# Supplementary material for: Selfish mutations dysregulating RAS-MAPK signaling are pervasive in aged human testes
Source: Genome Res. 2018 Dec;28(12):1779–90. doi: 10.1101/gr.239186.118 (PMC6280762; doi:10.1101/gr.239186.118)
Supplement: Supplemental Material [file supp_gr.239186.118_Supplemental_Table_S2.xlsx]

## Sheet: Median coverage per amplicon
Amplicon ID	Gene	Target coordinates (hg19)	Exclusion criteria	Median coverage across all 288 samples	Number of samples <5000x	Lib9_1_1D13	Lib9_2_1D14	Lib9_3_1D15a	Lib9_4_1D15b	Lib9_5_1D16	Lib9_6_1D17a	Lib9_7_1D17b	Lib9_8_1D18	Lib9_9_1D19	Lib9_10_1D20	Lib9_11_1D21	Lib9_12_1D22	Lib9_13_1D23	Lib9_14_1D24	Lib9_15_1D25	Lib9_16_1D26	Lib9_17_1D27	Lib9_18_1D28	Lib10_19_1D29	Lib10_20_1D30	Lib10_21_2F1	Lib10_22_2F2	Lib10_23_2F3	Lib10_24_2F4	Lib10_25_2F24	Lib10_26_2F25	Lib10_27_2F26	Lib10_28_2F27	Lib10_29_2F28	Lib10_30_2F29	Lib10_31_2F30a	Lib10_32_2F30b	Lib10_33_3D1	Lib10_34_3D2	Lib10_35_3D3	Lib10_36_3D4	Lib11_37_3D5	Lib11_38_3D6	Lib11_39_3D7	Lib11_40_3D8	Lib11_41_3D9	Lib11_42_3D10	Lib11_43_3D11	Lib11_44_3D12
121	HMBS	chr11:118963866-118963995	Excessive number of variants	25119.4	11	32745.7	29438.9	26679.3	5526	24589.9	29792.6	23125.8	20757.4	19311	22045.8	23729	19452.4	1614.05	19779.7	5608	22751.8	18500.8	16953	27588.9	30904.7	24723.8	6658	22949.8	23873.7	18540	20908.5	22649	19042	18736.9	24750.8	2318	20582.8	6540	17649	19686	17202.4	27822.7	31422.9	26983.7	7505.94	21304.8	25768.9	20971	23993.9
186	FLT3	chr13:28592624-28592643	Excessive number of variants	1846.47	200	2032	407	177	222	134	782	197	831	714	1089	1671	420	938	1690	1043	732	1063	1220	1264	303	125	106	148	457	140	1457	738	1163	907	265	1489	2234	887	651	2142	1142	808	160	61	106	106	471	117	1119
468	MECP2	chrX:153296497-153296535	Excessive number of variants	455.5	246	106	53	73	136	21	241	30	20	12	26	40	9	3	21	14	55	11	12	36	24	47	54	16	127	29	19	7	23	15	9	16	30	5	47	11	13	32	17	29	79	18	109	16	14
469	MECP2	chrX:153296760-153296818	Excessive number of variants	3895	182	5643	6016	3831	3886	4947	6112	3249	2759	3369	3788	4422	3449	3240	4183.76	3619	3317	2638	3304	3620	4072	5234	3452	5475	5926.17	2660	2984	3524	3431	2955.98	3140	5829	4709	4969	2537	3628	2584	3019	2689	3575	4832	3693	6881	3099	2759
470	MECP2	chrX:153296872-153296903	Excessive number of variants	987.906	190	493	157	307	59	61	252	59	154	13	164	225	15	68	116	12	43	45	35	249	124	271	41	67	178	49	203	17	145	148	16	130	155	11	45	60	29	154	57	180	56	57	158	36	163
146	PTPN11	chr12:112856888-112856931	Excessive number of variants	623	215	163	299	265	55	63	348	65	33	30	50	102.977	40	3	136	60	48	52	13	77	149	220	21	54	212	28	20	29	25	36	28	14	99	23	59	57	10	48	84	111	32	35	225	33	18
219	TP53	chr17:7577014-7577045	Excessive number of variants	428.5	233	77	56	84	37	41	74	32	13	18.6875	52	73	34	9	19	17	9	27	6	35	54	80.8125	13	26.6875	64	28	16	20	61.6562	35	45	24	12	16	11	30	6	21	24	44	12	32	49	18	18
453	ABL1	chr9:133748238-133748356	Low coverage	4407.32	177	4400.65	3680.92	4036.99	3066.88	4304	5890.3	3431	2918	3936.93	3176	3038.94	3656.61	3170	3675	4286	3517.85	3285	4355	3918	4337	4523.03	3344	4651.82	5724	5531	3790	5363	6384.92	6266.84	7021	5006.83	7227.96	3278	4333	4910	4024	4679.02	6773	3694	5855	5277	5731.6	4414	5347.88
26	AKT3	chr1:243776990-243777014	Low coverage	2601	218	5059	4891	5420	5238	4145	5980	2221	1606	2424	2877	2957	2822	2733	3255	2930	2531	1925	2345	3866	3866	5882	3586	5271	5402	2093	2061	2572	3064	2320	2430	4316	3609	2407	2444	2788	1977	2362	2302	2810	2977	3436	4476	1698	1620
254	ALK	chr2:29436831-29436948	Low coverage	4775.97	159	8803	5854	7137	5427.25	8472	9844.9	3697	4241	4166	4836	4931	4431	1582	4292	4353	5673	4151.97	2970	6378	6094	7259.72	4757	7032.88	7091	3866.96	4520	6095	5205	4170	6587	2441	5028	5231	5163	5417	3540	9811	7912	8157.95	9087	9624.92	8406	4218	6277
366	APC	chr5:112175280-112175314	Low coverage	13	288	7	2	6	2	4	2	1	0	1	3	9	0	1	4	0	4	1	1	2	0	6	3	5	1	2	1	0	2	3	0	0	1	0	0	0	0	4	0	1	0	2	1	1	2
282	BFSP1	chr20:17511769-17511926	Low coverage	4396.38	163	6671.78	6147.75	4535.25	4916.06	6296.78	5244.14	2604.09	1997.99	3396.78	3563.58	2629.46	3028.01	3634.45	3216.97	4158.86	3521.12	3252.96	3263	5100.46	5565.71	5273.62	5243.94	6584.58	5892.3	3807.91	2711.96	3532.66	4167.65	3487.99	4665.18	6551.68	5268.87	4314.98	5082.65	4478.97	3894.89	7057.73	7109.85	5101.92	7262.83	8710.93	6010.91	3638.97	4465.74
398	BRAF	chr7:140481347-140481479	Low coverage	2323.06	280	4404	4476.81	3932.74	2845	3704.92	3688.73	3399.98	4519.95	2623.8	3474	3385.7	5032.73	3236.94	3846.88	4559.85	4217.84	3985.83	4512.98	4581.75	4497.79	3912.86	4088.97	4952.74	4842.91	2512.92	2338	1618.95	2495.65	2592.92	2409.97	2794.92	1742	2186.94	2573.86	1900.98	2879	2013	777	1381.93	1662.96	2109	2244.78	2589.96	1934.98
402	BRAF	chr7:140487291-140487411	Low coverage	3549.48	247	5263.69	6122.88	3279.93	2741.93	5096.81	3453.9	4674.89	6786	3975.95	5151.88	4512.82	4795.87	4188.45	4931	4180.9	5682.88	4812	4740.8	5575.68	5815	4649.97	5052.93	6925.97	6435.66	3696.74	4090.82	2886	3265	3910.93	3707	3798.93	3130.93	3628.98	2907.91	2850	3756.88	3429.74	2540.72	2465	3015.78	2953.87	3203	3837	3281.74
410	BRAF	chr7:140507717-140507862	Low coverage	1566.98	288	3319.85	4300.64	2704.95	2051.97	2685.92	2030.99	2801.71	4307.88	2131.97	3207.75	2555.99	4452.86	2486.98	3174.93	3901.8	3299.88	3708.95	4101.86	4466.11	4003.97	3209.88	3816.77	4176.85	4493.88	2244.92	1705.92	1025.98	1727.75	2299.81	1463.85	1739.99	1284.94	1409.98	1853.99	1239.98	1796.99	1337	510.911	871.993	1274	1427.94	1308.99	1783.89	1313
123	CBL	chr11:119148923-119149008	Low coverage	94.5	288	161	125	95	108	159	140	81	84	68	84	136	94	94	132.035	101	121	81	117	103.64	112	148	109	164	157	78	73	94	77	60	98	67	88	82	62	76	75	78	88	80	121	86	110	62	76
480	CHIC1	chrX:72804315-72804467	Low coverage	0	288	0	0	0	0	0	0	0	0	0	0	0	0	0	0	0	0	0	0	0	0	0	0	0	0	0	0	0	0	0	0	0	0	0	0	0	0	0	0	0	0	1	0	0	0
481	CHIC1	chrX:72899451-72899585	Low coverage	845.97	288	2532.8	3607	1501	1093	1899	1058	2110	3241.88	1373	2468	1721	2630.79	1618	2349.89	2617.93	2619	2470.75	2560	3224.87	3014.9	2114	2821.82	3438.87	2967	979.97	745	425	814	999	848	1081.89	806	1091	988	851	1305	948	223	475	766	789	778	1009	864
482	CHIC1	chrX:72900701-72900842	Low coverage	803.926	288	945	1828.88	541.972	407	781.979	471.007	846	1961.99	860	1325.86	720	847	592.93	1072	1098	1140.98	1151.73	1118	1733	1959.93	1609	1528.93	2170.99	2039	859	877.937	511.901	707	1133.97	827	826	986	780	749.93	615	1028.9	885.986	532.993	627.993	673	795	1071	907	862
252	DNMT3A	chr2:25457236-25457294	Low coverage	2777.5	221	4423	4485	2761	2949	4251	3870	1875	1313	2067	2166	2357	2215	2050	2722	2711	2011	1707	1783	3424	3176	4871	2783	4402	4682	1770	1478	2367	2171	1773	2047	4065	3278	2984	1895	2504	1637	2907	2348	2837	3870	3495	5331	2192	1655
427	FGFR1	chr8:38272060-38272158	Low coverage	4766.01	159	7941	7257	4309	4403	8593	7174	4437	3415	3919	4162	4856	3841.94	4253	4728	3813	4313	3535	3038	5589	6297	6404	4629	7475	6711	3158	3007	4554	3159	2951	4184	6020	4737	5817	3112	4472	2822	6351	5837	5611	7583	6382	7951	4365	3881
336	FGFR3	chr4:1803442-1803536	Low coverage	1133.38	284	1356.59	935.032	1078	774.442	1276	1552	630	415.042	613	474	714	547.674	677.926	721.526	546	544.568	452.589	503.726	696	811	834.474	583	818.516	705	588	432.568	756	795.589	601	631	984.589	860	649	619	752	461	1022	1010	1276	1312.57	1142	1573	811	712
337	FGFR3	chr4:1803555-1803665	Low coverage	4646.82	162	5918	6173.99	3809.36	4769.82	7517.59	5290	3415.82	2972.3	2353	2984	3451	2775.73	2990	3578	3141.83	3329.82	2741.65	2665.31	4105.79	5241	6202.71	5094.6	6172.92	5861.73	2928	2822	3148	2714	2600	4019.95	5180	4014	4848.73	2913.94	3886	2750	6738	6498	6234	11163	7673.82	7198.29	4436.82	3649
340	FGFR3	chr4:1804665-1804793	Low coverage	215	288	374.721	317.767	271.736	290	433	413.76	201	234.899	293.868	223.984	273.868	238.38	206	261.008	255	269	218	237.853	192.876	356.372	279	202	295.891	257	166	200.884	245	197	152.891	250.969	192.992	145	208.915	179	192	154	250	239	229	256	268.829	237.388	193	172
343	FGFR3	chr4:1806002-1806157	Low coverage	1042.24	288	2900.81	2623.99	2305.99	2214.99	3111.98	2574.89	1671.94	1730.99	1778.96	1847.94	1833.89	2017.99	2060.97	2150.91	2301.73	2257.94	1932.92	1873.96	2329.92	2891.71	2175.99	2061.99	2574	2324.92	1503	1203.99	1518.95	1553.92	1314.88	1907.99	1910.99	977.955	892	1010.99	878.994	908	1302.99	983.994	949	1279.99	1595.89	1092.99	839	933.923
347	FGFR3	chr4:1807049-1807195	Low coverage	1027.18	288	2447.7	1847.63	1818.92	1786.93	1982	1842.86	1236.96	993.966	1097.86	1480.9	1228.72	1243.99	1411.81	1376	1284.95	1644	1214.88	1182.84	1896.73	1924.9	1433.99	1491.87	1774.93	1624.55	903	976.986	1057.78	1101.99	899	1311.97	832	804.966	793	826.884	749	722.517	1171.97	1139	892	1158.86	1267.95	941.98	628.959	721.993
348	FGFR3	chr4:1807158-1807228	Low coverage	1911.17	269	4094.97	4168.32	3024.38	3103.99	4249.89	3353.66	1366.2	866.521	1410.93	1690.32	1908.66	1426.06	1821.28	1901.61	1938.7	1494.61	1196.61	1233.38	2962.79	3210.34	5034.62	3072.08	5051.44	4679.73	1169.52	1014.31	1958.89	1617.89	1285.31	1862	3268.89	2136.42	2170.8	1670.76	2159.68	1189	2824.89	2698	2794.77	4885.68	4640	4891.89	1678	1120
133	HRAS	chr11:534240-534346	Low coverage	3126.59	273	2994	3436	2487	1916	3759	3380	2309	2682	2286	2190	2637	2460	2250	2787	2250	2265	2010	2095	2225	2731	2566	2291	3035	3369	2514	2196	3989	2945	2809	3133	4015	3122	3403	2147	2616	2293	2886	3516	3158	4206	2990	3521	2625	2856
358	KIT	chr4:55593985-55594090	Low coverage	361	288	667	731.019	495	494	875	693	556	510	452	541	613	418	501	590	509.009	570	502.028	557.953	574.009	659	583	532	738.943	729	277	405	368	325	316	406	259	210	317.028	194.009	254	205	283	260	263.943	345	304	307	260	262
167	KRAS	chr12:25362712-25362856	Low coverage	3412.41	225	6746.72	7885.38	5049.82	4007.46	5392.63	3774.84	5449.61	7166.3	3949.88	6654.03	4765.06	6623.44	5072.88	5464.64	6358.26	6591.63	6117.72	6312.39	8097.48	7433.62	5024.76	6308.79	8441.22	7102.7	4191.91	3338.94	1811.95	3299.82	3358.88	3132.41	4309.66	3170.77	3234.92	3875.72	2812.87	4443.71	3103.88	1144.93	2046.83	2325.79	2972.54	2775.96	3559.67	3122.88
465	MECP2	chrX:153296340-153296386	Low coverage	1905.48	260	4575	3806.02	4297	4200	4029	5148	1312	917	1581	1732	2177	1451	1773	2485	1965	1756	1214	1451	2669	2700	4545.02	2551	4022.94	3734.43	1284	1130	2066	1927	1345	1615	2509	2503	1671	1744	2263	1251	2544	2193	2745	3905	3518	4591	1471	1281
466	MECP2	chrX:153296386-153296409	Low coverage	1458.5	216	2172	2132	2474	2045	1684	2792	1236	688	1187	1406	1453	1393	1086	1347	1063	1100	782	812	1684	1813	3183	1482	2186	2113	878	1085	1299	1422	1101	906	2809	2011	1631	1179	1546	919	1288	1014	1951	1474	1592	2477	1044	726
467	MECP2	chrX:153296407-153296476	Low coverage	1971.5	275	3816	4374	2938	2937	4369	4082.8	1773	1713	2031	2126	2613	2136	1972	2730	2599	2233	1651	1971	2264	2671	4181	2263	3958	4366	1553	1492	2173	1997	1372	1951	1850	1962	1887.01	1535	1966	1282	2164	2059	2366	3363	2954	4021	1940	1979
472	MECP2	chrX:153297775-153297848	Low coverage	2761.5	252	6191	5451	3834	3953	5938	6103	2340	2016	2583	2747	3431	2774	3039	3660	3401	2765	2264	2285	3506	3852	5263	3152	5336	6108	1977	1901	3077	2760	1992	2802	3060	2870	2917	2158	3070	1845	3316	2939	3221	4467	4334	5742.86	2670	2357
197	NF1	chr17:29541434-29541519	Low coverage	3312.5	248	4000	5154	2023	2333	5149	3506.33	3272	5013	3250	3594	4129	3169	2956	4112.87	3318	3845.67	3422	3538	3261	3925	4018	3171	4744	4682	2721	3005	3279	2294.65	3015	2920	3408	3298	3509	1771	2595	2407	2637	2702	2656	3636	2511	4099	3201.84	2819
201	NF1	chr17:29548842-29548990	Low coverage	2070.91	286	3039.73	4472.54	1672.91	1475.92	2168.96	1306.99	2742.73	4028.83	2115.44	3343.46	1954.92	3259.81	1839.93	2977.94	3249.67	3484.93	2915.62	3358.42	5125.45	4939.64	3730.6	4518.12	4615.85	4320.48	2293.87	1799.83	1074.97	1857.87	2403.97	1571.93	2437.88	1892.79	1904.87	2228.86	1471.96	2444.89	1755.95	745.987	1210.91	1714.9	1882.05	1919.93	2063.97	1366.88
207	NF1	chr17:29665680-29665771	Low coverage	4596.5	169	8426.99	10277	4709	4847.05	10518	7017	7977	10844	6574	7396.99	8108.01	7572	6534	8400	6705	8852	7553	7372	7409.99	8544.99	7733	7449.78	10500	9593	4375	5382	4676.48	3920	4389	4995	4740	3607	5947	3593	3961	4230	4222	3591	3630	4951	3774	5140	5260.2	4069
208	NF1	chr17:29665773-29665806	Low coverage	2973	224	5810	6173	4949	5171	5186	6102	2891	2253	3162	3683	4100	3432	3119	4629	4000	3182	2492	3208	4357	4335	6988	4259	6572	6772	2358	2369	2994	3189	2440	2565	4730	4337	3320	2619	3365	2527	2567	2495	3256	3732	3538	5757	2502	2156
209	NF1	chr17:29665802-29665942	Low coverage	4115.71	205	5819.75	7810.91	3632	3106	4822.88	2990.94	5383.87	7309.65	4240.69	6205.63	4544.7	5528.52	4175.7	5077.88	5562.77	5922.69	5728.88	5860.76	7614.58	7217.35	5469.84	6246.86	8052.41	7326.62	4796.78	4391.96	2845.93	3983	5335.91	3822	4662	4312.87	3562	3735.96	3114.85	4127.7	3786.9	2948	2887.91	3410.97	3461.72	3427	3952.8	4062.87
305	PIK3CA	chr3:178921505-178921645	Low coverage	4796.81	150	6071.84	9605.76	3296.85	2912.94	5374.72	3058.91	5425.94	9255.73	5112.99	7766.77	4820.62	6096.8	4113.96	6331.87	5995.87	6830.75	6212	6651.83	10201	9626.52	7513.56	7894.74	9882.35	8927.56	5404.84	5637.75	3200.92	4207.94	5843	4550	5225.94	4672.91	4665.92	4221	4021	5142	4382.91	3382.93	3496.92	4567.99	4501.89	4510.87	5170.91	4609
310	PIK3CA	chr3:178935927-178936041	Low coverage	3835.99	215	6941.98	10307.8	3607	3266.69	6888.91	3430.91	6780.97	9872.97	5223.87	6782.9	5910	7450.87	5168.83	7373.9	6309.7	8859.01	7286.82	6822.05	8636.86	8000.69	6715.02	8121.94	10353.8	9596.9	4038.93	4620	2998	3156	4142	3909.93	4512.98	3422	4406	2794.99	3173.87	3959.91	3778.91	2709	3084	3695	2820.01	3432.02	4059	3387
311	PIK3CA	chr3:178936028-178936140	Low coverage	3314.98	249	6041.91	7531.65	4037.92	3777	6268.74	4201.79	5599	6876.81	4161	5684.89	5168	6401.01	4729	5880.67	5802.83	6925.82	6198.76	5357.76	6816.73	6865.64	5783	6643.8	8638.26	7660.92	3768	3753.9	2775	3234	3954.91	3740	3744.97	2819.95	3714	3032.96	2786.9	3638	3347	1671	2166	2841	3145	3073	3443	2433
312	PIK3CA	chr3:178938736-178938878	Low coverage	1749.49	288	2264.8	3534.78	1450.86	1106	1558.61	1056	2522.75	3992.61	1649	2911.8	1766.62	2463.86	1404	2344.73	2503.89	2385.6	2535.64	2817.9	3993.57	3874	3415.57	2998.78	4159.4	4328.22	2233	2253.89	1251.99	1864.83	2697.91	1855	1856	2196.87	1736.99	1659.99	1490.77	2264.97	1668.94	1405.85	1301.73	1594.95	1921.59	1873	2068.9	1653
79	PTEN	chr10:89653771-89653896	Low coverage	4808.4	154	8287.83	9701.65	5116.93	4997.9	7435.9	5111.92	7322.94	10167.6	5745.9	8742.45	6201.87	8781.9	6394.92	7278.91	8071.99	9019.93	8013.71	7725.83	10207.7	10049.6	7108.83	8970.9	11147.6	9863.85	5165.94	5028	3498.9	4323.99	5638.94	4651	5281.94	3875	4644.94	4780.89	3859.9	5603.99	4301	2338	3374.93	3633.88	4028	4172	4875	4071
82	PTEN	chr10:89692767-89692810	Low coverage	3225.36	214	8258	9234.02	6090.09	6417	7877	8153	4178.36	3581	4030	4734	5200.55	4825	4533	6459	6116.09	4880	3744	4869	5188	5337	7212	5251	8263	8585.09	2314	2166	2882	2776	2157	2773	3925	3005	3580	2710	3365.09	2516	2769	1306	2424	3696	3265	5053	2861	2561
83	PTEN	chr10:89692814-89692933	Low coverage	187.217	288	247.233	263.067	177.133	161.167	300	221.033	191.033	320	208.033	208.067	258.1	238.067	219.1	252.067	205.033	264.067	190	223.1	311.067	317.033	253.175	269.033	327	325.033	194.067	275.083	179	204.033	188.1	263.033	150	171	172.042	137	163	148	203	170	131	190	161	178	148	191
84	PTEN	chr10:89692832-89692955	Low coverage	120.468	288	242	254.871	157.863	163.927	285	190.935	221	313	203	232	234	227	190	245	204.927	265	239	222	200.855	247.927	225	176	234	203.927	134	149	121	105	136	149	104	74	95	65	77	100	101	120	80	122	114	104	88	108
64	RET	chr10:43614940-43615035	Low coverage	4282.05	196	7666.93	6432	4647	4976	7905	7692	3618	3130	3853.89	3844.65	4498	3916	3952	4950	4124	4516	3244.93	3333	4542	5164	6028	4407.98	6319	6476	3181	3056	4755	3806	2976	4626	4393	3887	4010	3440	4179	2847	5138	4730	4846	8414	6030	7119	3870	3678.94
244	RPL13A	chr19:49994646-49994806	Low coverage	0.726708	288	0	1	1	0.726708	1	0	0	1	2	0.726708	0	1	1	0	1	0	0	0	1	0.658385	0	1	2.45342	1	2.45342	1.86957	1	1	2.72671	1	0.726708	1.45342	0.726708	1.45342	0.726708	0.726708	3.63354	3.90683	2.90683	3.81988	5.08696	5.81366	4.63354	2.45342
500	SETBP1	chr18:42531859-42531961	Low coverage	4169.27	193	10545	10399	6885	7273	12667	10629	6955	7399	5813	6653	7561	6804	5974	7929	7407	8801	6458	6752	7279	7444.47	7868	7295	10312	9559	3232	3730	4435	3529	2749	4927	3773	2992	5530	3484	4318	3491	4546	2873	3489	5228	4231	4810	4351	4166
23	SKI	chr1:2160278-2160347	Low coverage	754	281	1161	1242	913	786	1532	1129	349	344	530	496	605	487	552	839	579	449	372	471	497	678	720	446	757	931	371	228	874	575	450	380	2074	796	862	540	723	408	755	841	1073	1093	705	1174	554	444
256	SOS1	chr2:39234230-39234353	Low coverage	4645.49	181	5862	7299	3401	3228	6124	3966	5253	7774	4745	5999.81	5210	5561.9	4666.64	5491.4	4934	6063	5608.9	5216.77	6523.9	6826.94	5687.89	5466.99	8364.89	7519	4836	4449	3761.94	4073	5229.92	4642	5126.89	4547	4362	3445	3463	4534	4410.93	3607.89	3362	4056.99	3751.89	4091.99	4385.84	4351
258	SOS1	chr2:39239463-39239598	Low coverage	510.426	288	896.993	1634.97	385.993	231	424.007	202.022	937	1827.01	450.89	999	622	864	401	1088	831.794	706.985	1039	1075	1774	1770.88	1135	964	1509.95	1493	766.934	737	269	339.029	767	423	710.015	732	619	387.015	398.949	808	633.007	350	355	363	364	565	689	536
260	SOS1	chr2:39241006-39241121	Low coverage	1667.5	288	3991	4375.78	2586	2180	3444.9	2241.95	3175.91	4335.9	2049	3325.96	2846.99	3604.95	2956	3221.93	3707.91	3871.84	3708.91	3522.95	4198.93	3774.97	2963	3674.91	4698	4644.84	1768	1362	947	1592	1696	1720	2037	1349	2345	1827	1662.95	1952	1627	285.991	983	1225.99	1302.98	1409	1973	1375
261	SOS1	chr2:39241846-39241989	Low coverage	2113.91	282	3547.65	5719.74	1897.4	1713.87	2598.86	1415.92	3212.81	5032.6	2368.83	4189.4	2344.71	3463.26	2159.66	3713.12	3872.26	3948.5	3780.6	4011.95	5866.39	5379.27	4320.49	5259.89	5576.65	4612.37	2540.84	2250.77	1263	1958.9	2528.15	1834	2525	2054.81	2196.92	2323.91	1769.78	2728.84	1652.98	970.993	1271.89	1857	1875.78	2054.71	2331.71	1737.8
271	SOS1	chr2:39262345-39262479	Low coverage	1495.4	288	3238.84	4342.92	1971.84	1530.91	2463.81	1539	2900.85	3996.89	1805	3390.84	2426.95	3429	2079.9	2745.96	3351	3449.93	3139.99	3216.84	4458.84	4009.83	3004.85	3290.99	4273.67	4008.92	1739	1726	857	1234	1693	1528.84	1560.98	1222.99	1458.86	1485	1210	1813	1510	642	1046	1217	1280.9	1269.98	1643.99	1233.99
217	TP53	chr17:7576612-7576674	Low coverage	2535.37	264	3365	4705	1882	1696	3656	2512	2471.06	3158	2535.05	2652	2879	2624	1994	3420	2967.06	2666.06	2221	2859	2932	3001	3891.33	2635	4799	5262.05	2818	2257	2502.06	2706	3053	2245	2920	3319	2538	1853	2155	2078	2110	1753	2001	2914	2330	3640	2622	2405
229	TP53	chr17:7579573-7579729	Low coverage	113.137	288	178.624	158.115	135.497	102.879	161.86	149	144.866	150.338	116.357	154.076	147.115	119.573	125.242	152.904	117.401	121.274	114.414	123.032	182.401	183.962	118.892	106.86	161.293	125.153	124.325	104.166	77.5605	104.427	92.6369	121.096	85.1592	114.65	66.9809	77.6242	67.7643	107.994	102.414	90.3567	76.7134	87.0382	105.879	106.93	78.8599	119.624
230	TP53	chr17:7579793-7579918	Low coverage	3879.91	215	4389.43	3517.85	2697.72	2661.48	4290.69	3969.8	3215.67	3055.5	2683.17	2866.98	3047.44	2627.67	2817.37	3078.48	2361.9	3389.7	2473.53	2686.58	3539.25	3700.71	2987	2766.79	3769.69	3645.17	2637	2880	3652	3395.69	2757	3903.69	4092.85	3491.84	3644	2687	3139.97	2695	4403.89	4144.88	3910	4473	3835.93	4531.98	3795	3432.98
494	VHL	chr3:10183842-10183906	Low coverage	2307.5	230	7338	5300	4781	6677	6716	7123	2068	1176	2102	2403	3119	2236	3022	3182	2875	2555	1747	1845	3475	3666	5743	3763	5352	4912	1207	1350	2624	1836	1238	2051	3479	2310	2772	1903	2485	1267	2910	2912	3517	5863	4527	5520	1875	1326
478	CHIC1	chrX:72783091-72783243	Mapping error	NA	NA	NA	NA	NA	NA	NA	NA	NA	NA	NA	NA	NA	NA	NA	NA	NA	NA	NA	NA	NA	NA	NA	NA	NA	NA	NA	NA	NA	NA	NA	NA	NA	NA	NA	NA	NA	NA	NA	NA	NA	NA	NA	NA	NA	NA
428	FGFR1	chr8:38272278-38272413	Mapping error	NA	NA	NA	NA	NA	NA	NA	NA	NA	NA	NA	NA	NA	NA	NA	NA	NA	NA	NA	NA	NA	NA	NA	NA	NA	NA	NA	NA	NA	NA	NA	NA	NA	NA	NA	NA	NA	NA	NA	NA	NA	NA	NA	NA	NA	NA
143	LRP5	chr11:68157320-68157473	Mapping error	NA	NA	NA	NA	NA	NA	NA	NA	NA	NA	NA	NA	NA	NA	NA	NA	NA	NA	NA	NA	NA	NA	NA	NA	NA	NA	NA	NA	NA	NA	NA	NA	NA	NA	NA	NA	NA	NA	NA	NA	NA	NA	NA	NA	NA	NA
179	MIP	chr12:56848026-56848176	Mapping error	NA	NA	NA	NA	NA	NA	NA	NA	NA	NA	NA	NA	NA	NA	NA	NA	NA	NA	NA	NA	NA	NA	NA	NA	NA	NA	NA	NA	NA	NA	NA	NA	NA	NA	NA	NA	NA	NA	NA	NA	NA	NA	NA	NA	NA	NA
199	NF1	chr17:29545966-29546122	Mapping error	NA	NA	NA	NA	NA	NA	NA	NA	NA	NA	NA	NA	NA	NA	NA	NA	NA	NA	NA	NA	NA	NA	NA	NA	NA	NA	NA	NA	NA	NA	NA	NA	NA	NA	NA	NA	NA	NA	NA	NA	NA	NA	NA	NA	NA	NA
5	NRAS	chr1:115252240-115252384	Mapping error	NA	NA	NA	NA	NA	NA	NA	NA	NA	NA	NA	NA	NA	NA	NA	NA	NA	NA	NA	NA	NA	NA	NA	NA	NA	NA	NA	NA	NA	NA	NA	NA	NA	NA	NA	NA	NA	NA	NA	NA	NA	NA	NA	NA	NA	NA
307	PIK3CA	chr3:178922331-178922468	Mapping error	NA	NA	NA	NA	NA	NA	NA	NA	NA	NA	NA	NA	NA	NA	NA	NA	NA	NA	NA	NA	NA	NA	NA	NA	NA	NA	NA	NA	NA	NA	NA	NA	NA	NA	NA	NA	NA	NA	NA	NA	NA	NA	NA	NA	NA	NA
90	PTEN	chr10:89720636-89720755	Mapping error	NA	NA	NA	NA	NA	NA	NA	NA	NA	NA	NA	NA	NA	NA	NA	NA	NA	NA	NA	NA	NA	NA	NA	NA	NA	NA	NA	NA	NA	NA	NA	NA	NA	NA	NA	NA	NA	NA	NA	NA	NA	NA	NA	NA	NA	NA
216	TP53	chr17:7576497-7576592	Mapping error	NA	NA	NA	NA	NA	NA	NA	NA	NA	NA	NA	NA	NA	NA	NA	NA	NA	NA	NA	NA	NA	NA	NA	NA	NA	NA	NA	NA	NA	NA	NA	NA	NA	NA	NA	NA	NA	NA	NA	NA	NA	NA	NA	NA	NA	NA
447	ABL1	chr9:133730283-133730439	NA	29920.7	0	38661.5	30142.4	28977.6	26332.8	28123.9	29104.4	26442.5	24828.3	21916.9	33751.3	22571.6	25522.7	25487.8	24486.7	23712.7	29041.4	21897.6	25463.5	36738.6	37418.8	23512.6	30913.8	33663.5	29441.7	28139.6	25873.5	25405.7	34127.8	26938.6	32762.6	37908.6	33359.8	22808.4	31892.4	26179.2	28603.5	32968.6	36543.5	26068.6	33181.7	41790.6	33552.7	26646.6	36881.6
448	ABL1	chr9:133730385-133730537	NA	14403.9	5	17656.7	15147	12332.8	10953.6	13787.7	12610.8	11469.7	13510.6	11214	15242.9	11422.6	12892.3	11751.8	11984.7	11776.7	13151.7	11713.4	12447.8	18256.7	16875.4	13320	13735.7	17204.2	14797.9	13893.8	13294.8	11674.7	15130.5	14557.8	15250.9	16012.8	16628.6	11470.9	14077.9	12303.9	14187.8	16960.6	16198.8	12102.7	14213.9	18356.9	15145.5	12283.6	17668.7
449	ABL1	chr9:133738116-133738260	NA	31355.2	0	39803	33471.6	30893.3	29095.7	31195.3	32151.3	29844	27626.5	24242.6	34496.4	25716.8	30399.5	28216.8	27073.4	25842.5	31703.7	24909.6	25967.7	38778.5	37360.5	30315	31744.4	35230.6	33616.6	28476.8	29442.6	28008.6	32584.5	28142.6	34259.7	37657.4	33785.9	26715.9	29035.7	26727.7	28524.8	39052.6	40963.4	32517.6	35733.5	40704.9	35186.5	27668.2	37759.4
450	ABL1	chr9:133738247-133738376	NA	24598.7	0	37993	30158.9	28488.8	25877	35848.6	35544.7	24317.7	22766.9	20464	25683.7	24539.8	23322.7	24714.9	24531.9	19324.8	27455.7	21276.7	19628.2	33023.8	31768.9	26189.8	25460.9	32166.8	29058.6	19763	23645.9	23520.9	22763.9	19861.4	27325.9	27013.7	22712	20611.8	20553	22558.8	20464.7	32981	34234.8	27276.9	31149.9	33659.8	28621.9	21494.9	28428.9
451	ABL1	chr9:133738312-133738473	NA	29633	0	40438.4	30725.8	33243.3	28063.2	28872.6	31046.7	26961.7	22050.5	21990.1	32016.1	22595.3	27376.2	27028.3	24205.8	23172.6	28124.7	22641.3	23895.5	38938.5	36189.9	25092.1	29454.9	35417.8	30176.9	27019.2	24805.7	23662.8	31477.7	25255.6	31740.7	36269.4	33179.2	22976.5	31542.1	27603.5	28077.5	37434.4	37054.4	27336.2	31670.7	43980.4	33143.6	25362	36126.2
452	ABL1	chr9:133747488-133747602	NA	6363.95	69	8410	8869.97	5280	4967	10031	7721	6986.9	9090	7108	7839	7434	7413	6814	7696	6463	7807	6808	6795.93	7743	8133	7338.77	7077	10005.9	9358.65	5561	6511	6529	5527.92	5895	6358	6415	6090	6464	4399	5236	5584	6446	6020	5154	6622	6089	6899	5806	6498
454	ABL1	chr9:133748323-133748425	NA	16630.1	0	25142.1	21748.4	15705.8	16277.7	27583.9	25923.8	15545.8	13605	13548	15396.5	17444.7	13233.7	11535.7	16207	10398.4	15783.7	12201.4	12551.6	17462	19597.7	19687.6	15097.7	21344.5	21949.7	11022	13206	16916	13596	11596	16393.9	13668	14303	14696	11085	15600	10788	19388.8	17419	18797.9	26541	20386.9	23139	14973	14768.9
455	ABL1	chr9:133750218-133750363	NA	14581.7	1	14528.8	13490.5	11440.4	8511.9	12693.9	12099.6	11789.8	13804.6	10811.8	14280.8	11589.5	12347.9	10918.8	12550.6	10467.7	13491.8	11691.8	12089.5	15498.8	17107.3	12250.7	12011.8	15187.7	13845.6	14414.8	13462.9	12253.9	14059.5	15652.9	15788.9	15426.3	17216.5	11229.3	13343.9	11726.8	13494.6	14039.4	15669.9	12624.8	13034.8	14913.8	14678.8	12873.9	17739.5
456	ABL1	chr9:133750321-133750460	NA	25491.4	0	33143.9	28952.8	24170.2	20934.6	27026.9	27134.3	22870.6	27097.2	21882.3	26664.2	22372.4	24045.1	24614.9	25042.7	19319.2	27402.3	21365.1	23995.7	32100.6	30612.3	23671.8	25718.9	30542.1	27805	22836.8	25214.5	23397.2	25210.2	24294.5	32067.3	31605	28543.9	21704.3	23058.4	22808.3	26152	32024.5	32138.8	24824.1	28279.8	31238.5	27711.9	23328.4	32227
249	ACVR1	chr2:158617457-158617615	NA	14546.4	0	15433.7	15175.4	10911.7	9279.79	11621.8	9788.92	12746.5	14264.6	10069.9	17331.5	10316.4	12466.8	10939.9	11555.9	11500.7	12976.3	11996.9	12096.9	17996.8	17838.8	13578.7	13996.7	17585.8	14495.4	14370.8	12491.6	9976.8	14955.5	15571.7	14207.5	17090.6	17444.3	12394.7	12844.9	11529.2	14059.9	14455.7	14364.9	11331.8	11890.7	15946.3	14026.9	12506.8	17061.4
250	ACVR1	chr2:158622411-158622543	NA	10041.8	10	11061.8	13018.7	6344.88	5813.9	10146	6825.98	9594.74	13622	8728.92	11870.9	8581.81	9848.86	8274.62	10312.7	8961.69	11194.6	10156.6	10095.8	13546.5	13529.7	10558.8	10818.6	14538.9	13218.7	10008.9	10292	7191.8	7992.78	10246.8	8866.7	11521.9	10764.9	9020	7463.87	7484.89	9586	9476.66	8640.9	7395.89	8130.92	8340.92	9134	9380.94	10160
251	ACVR1	chr2:158630545-158630662	NA	12837.6	2	14997.8	16676.5	10505.7	9731.88	16377	13078	13321	16638.7	12434.8	14016.8	12685.9	13897.9	12482.4	13231.9	11766	14979	12451	12673	14990.4	15558.5	12779	13601.6	17277.9	17650.3	11057.9	12864.5	9975.86	10375	11829.5	12746.9	13712.7	12654.8	12675.9	9161.86	9686.46	10613.6	12043	11280	9634.87	11969.8	11390	12423.8	10945.7	13071.8
187	AKT1	chr14:105246372-105246531	NA	27193.5	0	31787.6	27997.2	22345.1	20986.5	23100.3	21521.3	22460.3	21831.3	18774.6	27320.3	18344.3	20866.5	21845.9	22292.4	20358.3	23824.2	19652.6	20685.6	33185.7	32164.5	24583.4	23590.4	27194.7	25031.4	25290.6	21806.8	21514.7	28086.6	24632.4	29361.9	31530.6	31493.3	22347.3	27656.2	25626.6	26412.3	32676.4	33048.9	24409.6	30953.7	36202.6	30437.5	24745.7	33741.1
188	AKT1	chr14:105246451-105246595	NA	5879.91	101	8031.9	6410.99	5883.9	5261.85	6582.91	7052.99	5210.91	5601.86	4793.77	6007	4593	5322.81	4943.81	5289.83	5131.92	6160.97	4812.98	5107.99	6775	6679.86	5085	5199.92	6888.89	6929.52	6010.99	5188.98	5951.88	5529.94	5246	6498.91	7337.81	7046.88	5181.99	5981.83	5787	6177	8295	7762	4725	7574.89	8845.86	6488.99	6011.96	9287
235	AKT2	chr19:40762821-40762980	NA	21244.9	0	21200.7	19608.7	14805.5	11317.8	15731.4	14835.7	17495.6	18105.8	13954.7	23109.4	13132.3	17575.3	14288.9	15311.5	12369.5	15191.8	15603.5	17091.6	22956.3	23926.6	17523.4	16394.8	21652.3	19422.4	20248.3	17550.2	15020.9	20582.1	20605.7	21037.2	27240.7	26400.4	14410	19835.5	17482.8	22159.5	23333.2	21716.5	17984.2	18521.7	26985.5	23154.4	18328.9	25392.8
24	AKT3	chr1:243668490-243668636	NA	24465.8	0	24066.2	24692.4	17077.3	15162.8	18913.6	17855.4	19589.4	24168.2	17020.7	24794.2	17464.9	20684.5	18993.2	19641.2	18759.6	21581.4	18631.5	19084.2	27129.6	27926.5	20193.7	21288.7	23287.1	21445.5	24867.2	23608.6	17466.6	23371.5	26071.3	24075.7	31561.4	30357.7	22988.7	20847.6	19401.8	23720.8	23377.7	25066.6	19398.8	23127.8	24991.5	23104.3	22342.5	28632.3
25	AKT3	chr1:243776950-243776991	NA	6290	89	10865	10544	8638	8943	9625	12051	6094	5385	6874	7269	7816	7852	6570	8778	8172	6328	5280	6747	8334	8640	11241	8099	11081	12572	6043	5383	5871	6767	5853	6132	7043	7778	5622	5173	6164	4687	4758	4729	5900	6954	6285	9257	4840	5065
253	ALK	chr2:29432648-29432783	NA	14677.9	0	15393.9	15571.9	11210.9	9513.71	14141.9	13019	13225.7	16494.7	12658.9	15884	12241.8	13713.3	12672.6	13655.9	11558	14537.8	13078.9	13090.8	17158.8	17624.8	14521.5	13626.9	17811.7	17079.9	12758	14073.8	12175.9	14349	13192.6	15846.7	17995.8	16182.7	13550.8	10965	12101.8	13243	16352.5	15264.6	13874.8	14077.9	15274.9	14981	13397	15717.8
255	ALK	chr2:29443606-29443763	NA	27364.1	0	28858.4	27242.2	21992.5	18306.2	21987.7	20577.4	23474.3	25724.6	19229.5	29247.3	19329.9	23232.9	20728.5	22296.6	22105.3	23991.5	20903.2	22301.6	34170	32780.1	24016.2	24308.4	30867.3	26457.7	26990.7	24477.4	19962.7	28029.5	26737.5	28323.8	33177.2	34643	22961.8	25605.3	23527.9	27247.7	27597.4	28111.9	21446.5	23247.6	32306.4	27155.2	23030.6	33920.4
363	APC	chr5:112174612-112174763	NA	16925.6	3	17605.3	17127.9	12509.7	9841.59	13734.5	11101.5	15428.4	19412.5	12274.7	20036	13267.2	15375.9	12471.2	14152.2	14798.3	15693.4	14220.5	16352.4	20986.5	18702.1	14243.5	14704.3	20600.2	18570.3	18379.5	16135.7	11057.6	17031.5	19785.6	14106.6	19865.2	22070.3	13695	15666.3	13817.7	17746.4	14471.6	13952.7	11209.5	11964.5	15526.1	13822.5	15641.4	20715.2
364	APC	chr5:112175016-112175165	NA	10327.4	45	11215.7	11734.7	7683.89	6427.84	10152.6	8300.52	9518.87	13875.1	8138.66	12544.5	9098.8	9929.59	8515.53	9945.73	8522.81	11057.8	9114.83	9546.63	13461.7	13070.5	9860.81	9843.75	13607.5	11337	11162.8	11867	7783.95	9660.86	10892.9	9579.29	11447.7	12686.7	8602.94	9036.8	8265.73	10187.8	10313.9	10469.9	8380.59	8306.76	10165.9	9716.73	9577.81	12901.7
365	APC	chr5:112175139-112175281	NA	13617	19	16400.3	16239.4	11181.6	10889.5	13954.5	11097.9	13357.5	17928.5	11845	16931.9	11861.1	14121.5	12380.6	13332.9	13348.3	15316	13782.5	14307.5	19317.3	19480.2	13655.1	15840.2	19656.7	16713	14078.6	13430.7	10437.8	12724.8	14717.4	13621.6	15510.4	16142.6	11483.8	13066.5	11077.5	14560.3	12790.5	13264.9	9536.9	11356.8	13546.6	12523.8	12524.6	16421.7
367	APC	chr5:112175292-112175449	NA	11650.7	31	15229.5	14164.5	9851.47	8618.7	11555.8	9593.58	11384.6	13177	9217.22	14918.8	8974.07	11531.7	10853.6	10839.4	11665.6	12700.5	11145.1	11649.3	17747.7	15526.8	11154.3	12297.6	17819.4	14445.9	12679.6	9401.43	7829.9	10478.4	11941.8	10364	13047.2	14720.2	8936.3	11362.5	9223.44	12357.5	11198.6	10435	7119.01	8630.68	11933.6	10009.5	10762.2	15087.9
368	APC	chr5:112175448-112175594	NA	19971.8	0	22078.5	21195.8	16318.5	15024.5	17327.5	17421.7	19059.4	21717.2	15858.7	22936.3	16276.7	17392.7	17383.7	17921.7	15905.6	20184.5	17202.8	17418.5	25661.9	25388.3	18535.6	20383.9	21835.7	22356.2	21338.6	21069.8	16749.5	20432.5	21228.7	21683.6	24595.1	24945.4	15530	18833.8	18196.7	20515.3	21318.5	21681.8	16209.6	19285.9	19873.6	20192.9	17241.9	26679.7
369	APC	chr5:112175524-112175686	NA	16813.6	11	15390.4	14946.4	11922	10136.7	10922.8	12378	13256.6	16872.4	10643.8	17801.6	11766	12923.8	11494.4	12214	12735.6	14459.4	12609.6	13388.8	19695	17546.5	12955.3	13827.2	15346.9	15721.5	18284.7	16422.1	11963.9	17650.2	18639.5	15881.2	16921.5	21428	11667.1	15782.5	13540.8	15919.7	16551.7	17280.3	12208.4	13508	15439.9	16626.5	15464.6	23124.9
370	APC	chr5:112175604-112175729	NA	11769.5	20	14885.8	14753.9	10097.8	9760.81	15569.8	13413.7	10967.7	13046.7	10942.7	12059.5	12658.1	11801.7	11218.3	12170.3	11095.6	14130.2	11216.2	10732.7	14188.5	15914.7	12951.7	13608.4	15082.7	14779.6	10953.8	10581.9	10693.7	10373.9	11200.7	12331.4	10456.6	10917.3	11373.5	8771.76	9285.58	9568.87	12629.8	11993.7	9784.85	12562.7	11272.7	11959.7	9743.77	11059.7
371	APC	chr5:112175709-112175790	NA	8039.96	21	11210	12022	6648	7101	13104	11103	8286.95	8222	7319	7822.96	9422.95	7854.96	7373	9556.98	8453	7767	6631	7286	8050	9194	10694	8083.95	12291	12392	6142	7213	8667	6932	6310	7585	8952	8186	9660	5281	7288	5642	7109	6974	7270	10092	7562	11199	7670	7213
372	APC	chr5:112175749-112175862	NA	13093.8	8	13911	14927.7	8402	8305	16131	12496	12400.7	17438	11248.9	13191.9	13538	12236	10988	13424.9	10676	13814.9	11971	12552	13474.9	15311	12994.9	12597	16767.9	15646	11661	13790	11735	11479	12832	13822	12799	13695	13152	9349	11146	11699	13381	13172	11320	13867	12796	14332	12296	15329
373	APC	chr5:112175849-112175983	NA	8871.77	34	10400	12377.8	7126.86	6807.13	9741.79	7138.7	9978.4	13448.5	8126.84	12559.7	8482.04	10522.3	9050.79	10188	10061	11306.8	10442.6	10279.6	13309.9	12731.7	9126.14	11089.6	14362.3	13018.7	8889.67	8118.87	6140.83	7335.91	8803.74	7671.91	8655.6	8149.32	7493.41	7767.05	6501.04	9250.76	7436.05	5429.81	5287.93	6251.92	7291.83	7169.89	7809.93	8275.99
374	APC	chr5:112175937-112176072	NA	16609	0	15771.8	17798.5	11073.8	9521.85	14754.9	11139.9	14259.9	19345.6	12703	17670.8	13498.6	14106.8	12940.9	13766	12474.6	15775.6	14349.8	14432.7	17160.6	17912.6	13623.9	14182.8	18585.7	16509.7	16186.9	15503.9	11545	14213	17607.8	14846.6	17534.3	19136.5	13726.9	11902.9	12573	15113.8	14075.9	14273.3	11172.8	12390.9	14281.8	14756.9	15944.6	18043.6
490	ATP1A3	chr19:42474349-42474468	NA	15109	0	20388	17975.1	13792	13733.8	21973.9	19664.9	13573	12163.9	12515.8	13536.2	14570	12599.8	13928.8	13897	11506.5	14444.3	11164.8	11161.9	14989.7	17913	16150.8	14651.1	19698.5	17807.9	9958	11264.6	14021	11906	10481	16766	17808	13526	17133	10838	13463	10687	17970	17364.9	16525	21604	18858	18413	12940.5	12882
491	ATP1A3	chr19:42474578-42474713	NA	29431	0	34264.9	27973.3	31272.7	23342.2	35949.7	36491.2	23998.1	23197.3	22191.7	29614.9	27235.6	24861.6	22242.8	23302.5	20676.2	25838.6	22168.8	21354	31943.6	32399.9	30977	24163.9	34319.7	29906.8	22271.7	26059	25467.6	29372.8	24752.8	31797.8	31144.5	25789.9	26997.6	21968.5	26482.3	22039.1	34171.7	30115.5	33468	34544.3	39560.9	33899.9	22203.9	28242.7
281	BFSP1	chr20:17489503-17489661	NA	15795	10	20536.5	16313.6	14947.4	13120.9	15962.3	16368.4	13083.7	13880.2	12697.2	16965.1	11866.5	12725.4	12989.4	13463.6	12950.3	14728.6	12431.5	13016.2	21772.7	21163.8	14795.9	13363.4	17506.6	15407.8	15717.7	14360.5	14536.7	17734.8	14611.1	17268.8	19516.6	19451	12169.2	18496.4	15390.6	17342.1	21264.4	21876.9	15077.8	17121.5	24436.2	17272.1	14198.3	21317
301	BFSP2	chr3:133118904-133119061	NA	17425.1	0	24653.2	19446.5	17422.5	15212.5	17923.6	18444.6	14365.6	14286.3	14271.4	18917.4	13521.5	15753.3	14825.9	14811.3	14024.7	16533.6	13725.7	14414.6	21376.3	22341.5	17024.1	17114.5	21501.4	16544.6	13932.8	13348.7	13490.2	16350.3	14120.8	18005.8	20469.6	18222.4	14821.6	16588.3	14628.4	14959.6	18993.8	20549.7	15940.4	18090.6	24083.9	19437.6	13849.5	17422.7
302	BFSP2	chr3:133167324-133167471	NA	9456.39	51	11618.8	12368.6	7788.8	7103.72	9470.75	7065.88	9365	12890.4	8194.95	12948.5	7778.72	10327.4	8869.69	9741.43	10098.7	10870.6	10068.1	10318.6	14435.2	13848.5	10498.4	10819.4	14725.6	12778.5	11194.7	8928.97	6597.73	8928.87	10926.8	8228.55	11047.8	10919.7	7745.77	9383.8	7253.77	10067.7	9235.91	8023.8	6399.9	6948.78	8820.69	7871.78	8859.68	10682.8
303	BFSP2	chr3:133191259-133191422	NA	24834.9	0	30945.3	24811.2	20711.6	20357.9	19248.8	20272.1	20048.1	14686.9	15209.3	24067.7	15894.5	18069	15808.8	17461.3	17163	21268.5	16269.7	15994	32146.4	28928.6	22198	22592.4	27279.1	23265.2	19336.6	16293.9	17516.7	22975.8	19194.4	23301.9	29646	28772.4	20840.6	24211.6	22214.4	19106.1	27418	28671.6	22297.7	26208.3	35593.2	26216	19793.3	21891.4
389	BRAF	chr7:140439596-140439721	NA	14592.5	0	15655	16553	11523	10560	17233	13906	14937	20224.5	13235.9	17061	13669	13544	13303	14476	12076.9	16644	13897	13940.9	17094	17555.8	14595	15695	18866.7	17719	12395	15342.9	11835.9	12237	13577	13391	15145.9	14482	13908.8	11174	11333	12944	12940	12797	10423	12816	12772	13695.9	13024	15632
390	BRAF	chr7:140439700-140439804	NA	7246.16	38	8642.02	10363.9	5231.98	5067.91	11020	7698.98	8630	11691.8	7282	8205	8290.01	7499	7421	8647	7043.77	8848.8	7672.75	7812.98	8035.01	8720.97	7997.8	7613	11278	10044	6344.89	7065.96	5897.95	5527	6414	5888	6133	5907.98	6757.98	4539	5233	5370.97	5435	4944.91	5058	6161.94	5263.02	6615	6119	6438.98
391	BRAF	chr7:140449068-140449206	NA	13727.1	11	15113.7	15478.9	9924.55	9198.79	14006.9	10359	13842.9	18473.7	11081.8	16339.5	11557.8	12760.8	12041.6	12905.6	11911	14024.5	12630.8	13010.6	17331.4	18143.7	13287.8	14195.9	20252.8	16259.8	15132.9	14299.7	10487.9	13432.9	15553.6	13251.9	15680.8	16446.9	11242.8	11605.7	10073	13549.9	12568	12934.9	9480	10311	12727.9	11464	13174.8	15788
392	BRAF	chr7:140449186-140449297	NA	5340	108	6002	6845.86	4073.97	3627	7363.98	5138.91	5938	9100.96	5256	6416.99	6093	5737	5355.98	6329	5343	6502.95	6034.96	6084.9	6724	6862	5822	6106	8654	7576	5018.98	5590	4579	4428	5376	4790	5251.83	4987	5357	3685	3853	4539	4551	4427	3907	4533	4164	4963	4915	5345
393	BRAF	chr7:140453042-140453194	NA	17654	3	18432.2	19535.4	11662.5	10055.6	14099.9	11479.8	16073.4	20988	13092.6	21284.6	13019.7	15641.8	13545.8	15573.3	14865.6	15698.3	15425.8	16624.4	22028.3	21617.8	15326.4	17226.5	22838.9	21110.5	20385.6	16774.6	11723.9	18613.6	20815.7	17325.7	20853.5	22491.5	14543.2	16281.7	14540.6	19088.6	16312.6	16277.7	12019.8	13182.6	16220.2	15353.6	16937.5	21791.5
394	BRAF	chr7:140453983-140454058	NA	11191.4	10	12792	13844	8362	7972	13454	13299	10112	9181	9353	10412	10736	10057	8202	11172	10179	8496.99	7032	9251.95	10330	9999	12532	8825	12852	14657	8782	9682	9841	10131	9746	9653	12960	12696	11903	7190	9203	7749	8519	7798	9224	13032	10579	15783	10362	9564
395	BRAF	chr7:140476658-140476813	NA	12780.3	24	13590.8	13702.7	9612.88	8606.6	11788.7	9547.76	11738.5	14469.4	9726.9	15688	10091.8	12124.6	11149.7	10998.8	11847.8	12656.8	10985.9	12717.9	16519.7	16284.7	11559.3	12443.8	15564.3	13519.7	13978.4	12623.6	9634.87	12520.7	14800	12397.9	14650.9	16451.7	9982.67	12137.4	10003.7	14375.9	11998.7	11716.8	9036.91	9664.85	12866.6	11721.7	11710.8	16469.6
396	BRAF	chr7:140476805-140476948	NA	17970.2	1	19989.4	19946.4	14018.3	11898.4	18063	14402.6	15396.9	21735.6	14642.5	22224	15205.4	15888.5	15484.4	15685.2	15063.4	17621.6	18669.7	16759.4	23193.9	22049.6	15913.7	17227.3	23551.7	19409.4	17916.5	18089.6	14054.7	18131.7	20216.8	18362.9	21161.5	22027	14774.9	15156.4	17292.7	18063.8	16556.9	18041.4	14026.5	14440	17940.8	16394.9	15806.8	21916.6
397	BRAF	chr7:140477750-140477890	NA	10559.6	24	15136.6	16625.8	10515.9	9092.88	13710.6	10248.7	13260.9	16989.8	10517.7	16086.8	11420.8	13329	12254.6	13213.7	12620.7	14528.8	12844.9	13135.8	17746.9	16239.8	13357.7	13956.5	17277.7	15829.9	11329	11727.9	8233.89	9287.87	11859.9	11007	11343.8	10405	9432.63	9743.89	8710.96	11631.9	10136.9	8166.78	7350.99	8456.8	10203	9067.87	9793.87	11074.9
399	BRAF	chr7:140481396-140481513	NA	21203.9	0	21186.9	23114.9	13759	13618.9	22666.8	20328.9	19573.8	23993.7	17775.9	21188.9	18594	18642	17451.9	18639	15062.6	20462.5	16671.8	17410.8	20859.9	22030.5	20666.9	18161.9	23987.9	23825	16580.9	19703	18685.8	17507.7	18272.9	21449.9	23409.8	21068	20381	13623	16351	16690.9	20155.9	20616.9	18210.6	21264.9	19644.9	21225	17836	21394
400	BRAF	chr7:140482773-140482929	NA	15308.9	11	12353.8	12951.3	10181.3	7209.92	10004.9	8306.16	10595.7	13595.7	9077.67	14261.9	9115.26	10191.5	9664.99	10567.1	10900.9	10853.2	9930.9	11370.6	15264.5	14349.6	11984	10674.3	14700.9	13435.4	17415.1	13424.5	9903.58	16380.2	19224.3	13378.6	17840.4	21800.2	10645	13797.5	11619.3	15200.7	13226.5	13473.6	11138.6	11692.5	14818.2	14108.2	14244.3	19021.6
401	BRAF	chr7:140482868-140483010	NA	21053.8	1	17867.3	18528.6	14096.3	10726.8	16271.2	13625.5	15759	17609.7	13809.5	19374	14061.6	13524.4	14827.7	15214.5	13828	17979	14957.4	16061.1	21653.6	20588.3	18917.2	17584.7	22608.1	22216.5	20163.4	19341.6	15713.8	18629.3	22840.6	21240.2	22946.7	24608.2	15508	17012.2	16900.6	19548.7	21609.3	22645.3	18165.4	18426	22100	19742.3	18199.3	24984.1
403	BRAF	chr7:140493995-140494132	NA	6390.55	87	9685.19	12753.8	6131.4	5111.41	9155.2	5961.3	8851.99	12925.8	7119.36	10449	7582.3	9418.2	7900.33	9034.05	8895.26	10303.2	9293.36	9228.09	12331.9	10775.2	8229.57	9924.22	13171.1	11541.1	7601.43	7519.33	4666.65	5959.62	7194.49	6344.58	7140.62	6102.31	6093.5	5353.54	5126.4	6968.26	5908.33	4726.49	4437.65	5202.75	4904.74	5118.58	6271.51	6095.54
404	BRAF	chr7:140494112-140494254	NA	18899.3	2	21713	20965.1	15056.5	14568.4	19561.8	15863.4	18641.5	22630.4	15133.6	22370.1	15630.1	19010.3	15886.5	17536.1	16679.6	20381.5	16949.9	16827	24711.6	23361.9	16896.8	20337.6	25428.2	20568.2	18603.7	18560.5	12857.7	17370.1	19093.9	17725.4	20567.3	18790.1	14484.2	16669	15150.8	16127.3	18137.7	18760.7	13685.2	16140.1	19838.5	16447.4	17555.6	22457.1
405	BRAF	chr7:140494156-140494269	NA	16329.1	0	20466.5	19543.1	14706.4	13110.6	23152.5	18729.3	15303.3	20202.7	15224.8	16826.5	19227.6	16482.6	15706.4	18134.4	15337.2	19300.2	15215.3	15954.4	19465.2	20268.5	16931.6	17577.4	23463.2	21018.4	13394	14683.9	14959.9	13826.7	15247	16508.2	16459.9	15289.4	16007.4	11848.9	12647	12797	16892	15586	14451.9	16459	16069.8	17237	14357	17908
406	BRAF	chr7:140500131-140500274	NA	30471.6	0	30752.5	29564.1	21951.4	20286.2	26523.1	24479.6	26538.9	27343.4	22441.4	30505.5	22334.6	25047.8	24057.7	23461.7	21090.7	27738.8	22048.3	23236.9	34233.6	32637.7	24194.5	27357	31117.8	27968.6	26754.6	28489.8	25947.5	28452.6	27863.6	32413.6	37847.3	33932.5	26787.2	24722.5	23578.4	27516.4	32958.2	32371.5	26588.6	30363.2	33222.1	31569.4	26721.6	35046.5
407	BRAF	chr7:140500206-140500306	NA	11139.6	0	12635.8	12928.8	8592	8815.88	14691.8	13328	10099	12122	9734	10835	12199	10675	8866	11200	9916	11125	9166	10041	10832	12473	11167	10380	13678	14025	9083	10030	10252	10032	9829	10460	10574	11544	11124	8280	9393	8836.91	9904	9762	9827	11711	10406.4	12735	9878	10760
408	BRAF	chr7:140501203-140501348	NA	6275.29	85	7836.71	8061.6	5259.64	4867.69	6819.61	5525.78	6761.56	9249.28	5665.79	8888.45	5319.82	7257.47	6233.5	6758.6	6782.79	7355.65	6631.55	7012.75	9029.62	8898.49	6864.55	7393.49	9217.35	8169.6	7011.42	6163.74	4431.75	5941.66	6670.63	5746.61	7364.47	7024.77	5404.64	5911.83	4995.55	6253.86	5305.86	4792.86	3890.75	4370.87	6215.79	5424.77	5730.77	7059.75
409	BRAF	chr7:140501270-140501375	NA	11443.6	5	13496.8	15517	8156.69	8053.78	16769	12477	12948.6	17890.8	11441	12493.9	13156	11749.1	11181	12816	9984.89	13684	11425.9	11575	12381.9	13930	11781.7	12258.9	16675.8	16064.9	9408	11752	10354	9058.88	10892	11405	11372	10988.9	12400	7218	9443	9110.97	10182	10163	8677	11143	9216	11438	10386	11763
411	BRAF	chr7:140508690-140508814	NA	17219.4	0	21925	23443.8	15821	14575	24162	19840	19819	23479	17060	21593.9	19703	20114	19522.9	20915.9	16884	22875	18284	18487.8	23736	23903	21579	20964	25304	23320	15910	18494	15620	15456	16552	18588	20059	16497	17946.9	13783.9	13821	15984	17946	17029	14731	17866	16895	18243	14862	19208
122	CBL	chr11:119148857-119149006	NA	5884.11	102	7778.93	9238	5197.65	4413.94	6364.29	4714.11	7061.2	9467.23	5580.8	9549.41	5948.9	7709.23	5819	7119.8	7361.89	7968.59	7402.39	8251.35	10025.6	9728.85	7674.52	8031.45	10765	9913.73	7094.97	6292.63	3947.17	5581.56	6745.18	5095.65	6633.69	5861.09	4511.49	5734.9	4093.06	6627.13	5390.43	4417.89	4014.29	4498.73	5130.85	5018.25	5608.81	5659.01
124	CBL	chr11:119149209-119149363	NA	18666.2	5	22301.9	19268.7	16777.8	13555.1	17287.7	15878.3	17691.9	20138.1	15028.3	22655.2	15474	17565.8	17343.7	17185.9	17155.3	19981.7	16658	18231.9	24720.8	23480.6	16875.2	19620.2	23108.8	19453.8	18596.2	17186.3	13698.4	18609.2	18592.3	18902.6	20469	20812.6	14151.5	16639.2	14459.4	18846.3	18123.2	19377.4	13999.3	15012.2	19451.4	17556.2	14920.1	23171.8
125	CBL	chr11:119149318-119149443	NA	23907.1	0	26179.2	21839.4	19276	18281.8	26101.6	26964.4	19987.1	20637.2	13644.9	23558.8	22533.8	15002.8	11866.5	19815.5	16990	22089.6	17971.7	18864.6	22201.8	23831.6	21939.9	20770.2	23665.5	25135.6	19357.9	22126.8	15170.8	22176.6	20081.8	18775.5	16126.8	24240.8	22020.8	17647.7	19860.8	18620.8	25928.6	23938.7	23422.8	27616.7	24505.5	26409.9	20240.9	23680.7
479	CHIC1	chrX:72783199-72783361	NA	14945.4	0	18528.3	12560.4	16374.8	13622.5	13708.5	15467.8	10638.3	7892.75	9522.26	15669.8	9461.4	8692.18	10770.5	10739.4	10835	13788.1	9142.07	9911.62	19401.2	15660.2	13053	14036.8	15914.5	14422.7	11019.9	10733.5	11752.2	17072.1	12460	15677.6	19378.2	16273.4	12281.9	15374.3	13529.5	13144.1	17869.9	16759.8	15393.9	15929	22764.2	16505	11315.7	16331.3
27	COX15	chr10:101474321-101474477	NA	15702.3	21	15676.6	14356.9	12583.9	10486	13092.4	13546.7	11537.7	13026.8	10510.9	15798.8	11677.8	11169.6	11818.8	12641.9	12767.8	12875.9	12058	13263.7	18009.2	17407.6	14532	13319.6	18107.4	15498.4	14634.9	10528.5	10533.6	14767.7	15310.6	14143.9	18174.7	20833.7	11600.8	18216.9	15297.7	16916.7	19145.5	19857.6	14180.9	15837.9	21669.6	18139.6	15961.4	22986.6
28	COX15	chr10:101476090-101476246	NA	12271.9	15	13653.9	14545.9	9638.41	8393.86	12518.9	9869.54	13550	15951.6	9421.87	14770.7	10681.9	11668.8	10585.8	11210.9	11261.7	11121.9	11544.8	12697.1	16590.8	15654.6	12339.5	12619.5	17569.6	13776.8	14622.9	13400.6	8258.99	11078.8	13947.7	11812.7	13792.6	14081.8	9678.87	10156.8	9850.92	12327.8	11376.7	11412	8915.98	9730.77	13569	10042.9	12155.8	15219.6
29	COX15	chr10:101478146-101478296	NA	10829.2	37	13655.7	14413.7	9402.17	7489.12	11556.9	8819.68	12274.3	14522.3	9652.19	14453.9	9560.36	12403.5	9419.11	12046.2	11047.2	12171.5	11420	12230.7	17171.4	16676.6	12400.5	12066.3	18020.4	16260.6	11281.5	10596.9	7821.41	10197.7	11587	11312.8	11596.3	12411.1	8861.99	9927.25	8628.34	10877.2	10318	8911.89	7537.41	7400.27	10758.9	9412.95	9979.69	12424
30	COX15	chr10:101486821-101486981	NA	18854.2	4	18813.2	18257.1	15315	11915.2	14281.4	13635.3	17507	19411.8	13556.1	22237.9	14372.3	17631.9	9451.61	15288.4	16130.7	17380.2	15345.4	17405.1	22859.5	21270.4	18221.4	15931.2	22044.2	20127.4	22100.9	19099.9	13308	20925.3	22413.7	19015.9	14011.3	23886.7	14983	18360.7	15459.2	19895.9	17794.4	16898.7	14112.1	13872.1	19608.1	18231.1	17039.8	23432.9
31	COX15	chr10:101489271-101489427	NA	24303.2	1	26850.7	24366.3	20266.3	18184.3	21443.6	19174.2	20374.5	22002.3	18280.1	27741.9	17798.3	21169.3	20842.1	20176	19726.3	22122.1	19530.1	20842.7	30525.2	29051.4	22814.1	23663.5	28722.3	24752.4	24214.6	20596.6	18862.5	24915.2	24704.5	24885.3	29748.5	29920.7	18476.2	23795.4	18611.7	23526.4	26699.1	27351.1	20928.7	22897.4	29215.6	23880.2	21159.6	30410.3
375	CSF1R	chr5:149433625-149433789	NA	25991.6	0	31016.4	24106.4	23146	21457	21500.7	23055	22468.1	16769.2	16847.1	25801.9	16367.5	19967.2	19503.2	19281.4	19445.3	21678.5	16860.4	17651.3	30053.7	28251.1	22586.1	22439.6	25980.1	22143.6	21226	19186.1	19001.1	24826.3	21387.8	25669.9	32849.6	29858.5	21542.2	24988	22143	22537.1	29992.9	29600	24255.6	28895.7	35855.7	27594	21964.1	27242.7
376	CSF1R	chr5:149434799-149434909	NA	15525.8	0	19940.5	19261.8	11681	11572	22885	18067	14953	13877.9	12697	13921	14811.8	12894	12172	15168	11649	15474	12079	10593	16067	17006	16195.8	14976.9	18946	17132	10369	11837	13435	11275	10426	13597	16958	14060	17567	9760	13148	10417	16489	16369	15356	19739.9	15562	17960.7	13566	13102.9
377	CSF1R	chr5:149435553-149435712	NA	5353.63	125	3149.99	2903.96	2350.92	2032	2597.96	2635.89	2304.9	2673.96	2191.96	2790.86	2132.98	2884.89	1940.96	2132.87	2044.49	2448.91	2064.9	1967.99	3158.78	3644.88	2689.96	2548.89	3450	3098	4476	3816	3851.8	4146.98	4349.67	4220.92	6140.77	7451.86	4400.99	5788.73	4657.96	5353.88	6822	7549.95	5287.98	6341.81	7938.91	6529.94	5020.96	7252.93
378	CSF1R	chr5:149435781-149435923	NA	12410.9	1	17405.7	14163.5	13723	11005.9	14240.5	15130.4	11339.7	10647.8	10540	12699.8	11838.7	11801.8	7963.94	12412.8	10993.6	12786.9	10576.6	10360.8	16602.9	17245.8	13479.9	12598.6	15150.9	14012.8	11401.9	10991.9	11156.7	11975.9	11221.9	14503.9	11369.7	13822.8	11861	11827.7	11663.8	10818	17089.8	18351.9	13757.9	14876.9	16352.6	14879.3	11072.8	14706
379	CSF1R	chr5:149436826-149436951	NA	20398.2	0	27160.9	23523	17762.6	17479.9	29200.8	27642.6	19903.2	18430.9	16304.9	19523.7	19559	16635	17094.9	18303	14014.9	20757.9	15777.9	14562	22069	24508.4	20168	18961.8	26825.2	25183.6	14486	17310.8	20308	17301	14699	21601.9	23267	18771.9	20688.9	14335	17573.9	14797	25818.8	23512.9	23787	27897	25322.9	26800.9	17836	18553.8
380	CSF1R	chr5:149440398-149440542	NA	22283.7	0	33673.3	27142.7	25285.6	23705.7	28815.7	26727.6	23393.7	21962.7	20238.9	25895.8	22485.3	22622.8	22421.8	22563.5	20043.9	25207.7	19758.7	18784.9	30665.5	32498.7	24097.6	24736.7	29648.4	25933.6	18514.8	21278.5	20627.8	20524.9	18340.5	26592.6	30651.7	22142.9	22223.8	20852.9	20148	19982.9	30002.8	30496.6	24355.9	28716.3	31257.6	25533.4	19715.8	25353.7
381	CSF1R	chr5:149441051-149441168	NA	14351.2	0	18487.4	14729	14901	12228	17517.9	19471	11547.2	11110.7	12587	13679	13364.9	12572	12080	12728	11987	13045	9833	10659	15573	15647	15367	12040	15488	17445	11602	13514.9	15536	14482	11921	16376	15861	14083	13826	10069	12422	10426	16771	15559	15760	18229	18044	19109	11439	14104
330	CTNNB1	chr3:41266061-41266208	NA	15660.9	16	21564.4	20132.8	14786.9	13519.7	17314.5	15569.5	16289.7	19338.6	13609.6	19743.1	14505.3	17050.5	15852.7	17365.5	17261.4	18493.6	16399.2	17328.3	22868.7	22867	16522.1	17972.6	22857	20363.6	15531.6	15482.8	12671.8	15702.7	15825.4	17260.6	18113.8	17054.6	13528.7	15684.6	12790.6	16396.5	16583.8	15897.9	11943.3	13631.5	16846.8	14986.9	14368.6	18367.8
416	EGFR	chr7:55241601-55241733	NA	17705.9	0	21094.6	21553.2	13623.5	13533.6	19620.8	18310	16641.8	19861.8	15667.8	18950	16394.8	15408.7	17454.8	17508.7	14529.9	19954.8	15224.8	15778.8	19440.7	20981.9	16302.9	17280.8	19091.9	19965.8	14223.7	16392.8	14777	14932.5	14791	18970.8	18990.8	16295.9	15780.7	12729	13135.9	15020.9	17863.7	17785	14345.9	17271.9	16523.8	17777.8	15535.9	17696.8
417	EGFR	chr7:55241646-55241802	NA	16917.7	0	17177.5	16138.2	12313.2	11052.4	14687.9	13081.8	14512.8	14930.5	12413.6	18275.5	11387.2	12844.2	13536.2	13809.6	13399.3	15832.5	13592.6	14451.7	20859.6	20597.4	14725.1	16166.7	20694.3	16414.8	16390.7	14655.4	12550.9	16501.7	16375.4	15550.1	20695.5	21157.4	14890.7	14820.8	13509.7	16831.3	17443.3	17809.6	13729.8	14692.5	18818.8	16336.6	15388.7	19834.2
418	EGFR	chr7:55242375-55242522	NA	25525.2	0	23591.1	23060.8	16388.8	15029.8	20352.6	18421.5	20630.8	23546.3	18389.7	25181.2	17320.6	19532.2	16990.4	19342.7	18128.6	21129.3	18586.7	19565.7	26481.5	26939.5	19402.9	21666.6	25524.7	23070.9	24776.7	23426.6	18958	24699.5	26348.8	25525.7	30371.3	31871.6	21821.9	21252.3	20482.9	24368.7	24311.9	22104.9	20227.6	23305.7	26303.7	25200.6	23535.8	30392.4
419	EGFR	chr7:55248976-55249101	NA	15362.1	0	28166.3	21380.8	22582.4	21816.2	27818.2	29475.4	16385.8	13411.7	15314.6	16425.7	17237	16320.8	17106.6	16569	14700.6	18430.8	14687.7	13676.5	21902	24326.3	20285.6	19596.5	24955.3	20899	11648.8	13565	15417.7	15136.6	11278.9	17676.7	18530.2	13685	13800.8	12889.9	13366.5	11175.9	23303.9	23214.8	19598.3	23798.7	24409.9	19701.8	12224	15129.9
420	EGFR	chr7:55249054-55249200	NA	25802.1	0	30651.6	26427	23702.5	22058.3	25134.4	25419.6	21772.1	20791	19296.8	24941.1	20014.5	21245.4	21659.8	20552.6	18991.4	22967.7	19445.9	19105.9	31160.5	31309	24462.4	24792.6	28529.1	24920.4	22818.7	23676.3	23048.5	24536.8	21423.6	30088.6	31132	26064.6	21901.7	22109.2	22773.3	22910.6	29521.6	28876.4	23387.5	28531	31379.2	25967.2	20571.7	28775.4
421	EGFR	chr7:55259388-55259545	NA	27780.2	0	36457.3	32526.5	29311.1	24670.2	25472.8	27151.7	26450.6	25061	21776.8	32594.9	22729.1	24741.8	23768.4	25664.1	22236.7	28374.6	21315.1	22717	42161	39266.9	29336.2	30106.2	33070.2	28826.4	28085.2	26699.3	24847.3	31823.4	30207.9	34105.2	37648.9	37791.4	23641.9	30921.3	22639.9	27711.3	34287.2	34176.4	25747.3	29945.7	35363	28312.7	25418.3	34266
422	EGFR	chr7:55259508-55259664	NA	20885.3	0	23682.3	20867.3	18291	14548.5	19556.4	18611.2	16310.7	18724.3	16001.5	23012.1	15536.5	19060.4	16726.3	19365.8	22007.1	18846.9	17878.5	19259.5	25966.2	24639	17373.4	17336.5	23826	20077.4	18783.7	17271.5	15311.5	21412.6	20198.7	22200.2	23004.5	25536.1	18548	20359.8	18180	20817.7	22931.3	21426.4	16782.5	17386.4	27053.6	20902.6	17596.6	25349.2
423	EGFR	chr7:55260417-55260547	NA	14881.1	2	17472.6	17185.7	11543	11696.6	17262.7	14117.7	14795.7	18633.6	12855.9	17013.7	13841.8	14434.9	14060.6	15161.7	13794.9	15822.7	14855.7	14916.8	19473.8	18826.5	13998.6	15505.7	19765.8	17058.8	14048	14348.9	12212.9	13583.8	15716.8	14939	18099.9	17184.8	14981.9	12937	13151.8	14632.9	15194	16198.9	12030	14496.9	15646	14965.8	14222.9	17100.9
424	EGFR	chr7:55268828-55268982	NA	14467.4	11	15892.8	15268.7	11161.4	10484	12774.7	12166.7	11962.6	13461.7	10986	15468.7	11005.9	12115.6	11770.5	12121.7	11220.7	13405.3	11469.9	12022.8	17481.7	18437.7	13931.8	14897.8	15465.7	15379.6	15763.8	13554.8	12410.4	14701.8	15199.7	14982.8	16443.8	17412.8	11099	14145.5	12155.9	13795.7	15389	15676.4	12074.9	14337.7	15850.4	14947.4	13477.9	17721.8
425	EGFR	chr7:55268977-55269070	NA	16031	1	20809	19853	14908	14791	22050	23650	14250.6	13063	13224	14783	16537	13959	12970	16037	13395	14128	10540	12167	15902	16681	18640	14766	19480	21395	10903	13698	16288	14132	11789	16025	16891	14286	18051	10172	13856	10515	15401	14244	15789	25364	18407	22929	14106	13568
210	ERBB2	chr17:37880214-37880341	NA	12857.9	0	14332.6	14102.7	8913	7984.62	14425.5	11911.8	12331.8	13573.8	10247	12339.8	10814	10991	10349.8	11994.9	9069.88	12472.9	10181.7	9795.88	14232.8	15117.6	11913.9	11591.9	15527.8	13159.9	10245.7	11450.9	10955	10056	10785.7	12790.8	14746.8	13439.9	13108	9538	10515	10746	14117	14517.6	11882	13621.9	12540.7	13340.8	10805.9	13557
211	ERBB2	chr17:37880968-37881068	NA	16385.7	1	29393	22151	21999	22029	31878	32085	16360	13233	15630	17274	19957	15715	17197	18040.9	16002	17521	12672	14321.6	18511.9	20176.9	22940	18593	25093	24299	10916	13174	18971	14843	10958	18954	18372	15543	19080	12429	15667	11155	20923	20429	19365	28155	24963	23978	13502	14657
212	ERBB2	chr17:37881048-37881199	NA	22918.8	0	25334.5	22545.3	17264.2	15295.9	20031.4	18384.7	20192.5	19696.7	15531.6	22082.7	17061.8	18082	16599.7	18427.3	15630.7	18949.7	15917.7	16529.6	25654.7	26120	19225.5	20561.6	23261.8	22055.5	19390.7	19208.7	17632.9	20220.3	19477.7	22958.9	26394.5	24767.4	17868.9	19437.6	18516.6	20150.5	25146.3	23927.1	18773.8	23371.2	26087.3	23101	19257.6	25985.8
213	ERBB2	chr17:37881291-37881426	NA	28658.5	0	37069.5	31782.7	24246	24424	31711.4	31051.3	27121.6	23897.6	23896.8	28700.3	25494	26628.6	20632.6	25665.2	20608.4	29961.3	21975.4	21291.6	34292.6	34278.9	27410	27245.9	31304.8	29786.7	22620.4	24250.8	27231.4	24949.5	21755.7	31514.9	31012.7	26599.3	27894.1	23995.6	25125	23290.3	34315.4	32810.5	26959.7	31842.6	31373.2	30626.2	24664.2	28507.2
412	EZH2	chr7:148506392-148506492	NA	18245	0	16773	18969.8	10121.9	10382.1	20619	17168	15820.9	19879	14330	15480.9	16518	15044	13465	16198	12613	15751.9	12653	13985	15338	16911	15730	14058	18905.5	19166	14567.9	15750	15115	14366	15944	16045	17124.6	16850	17594	10327	13900	12944	14144	14101	14117	17244	14326	18652	15250	16426
413	EZH2	chr7:148507422-148507537	NA	13565.5	0	13082	14665	8652	7962	15632	11719	13278	18038	11823	14027	13211	12476	11442	12877	10821	13632	11864	11575	13605	14839.9	12711.4	11759.9	16722	15706	11828	13563	11620	11082	13268	13231	13973	14874	14721	8510	10911	11929	13538	12970	12064	13678	12332	14731	12639	15499
414	EZH2	chr7:148508715-148508842	NA	9522.89	12	11212.7	11680.8	7076.98	6959	10689	8814.92	10226.9	13355.9	8727.8	11430.7	9863.91	10223.8	9076.9	10448.5	8644.97	11239.9	9798.87	9372.87	11140.9	12523.3	9784.81	10269	13162.9	11445	9349.98	10688.9	8317.95	8693.82	9989.91	10133	10548	10904.9	9417.91	7682.83	8135.91	9052.98	9505.92	9603.96	7757.89	8842.86	8527.51	9315.89	9107.92	11122
415	EZH2	chr7:148526805-148526923	NA	5014.45	143	5787.88	7170.92	3763.89	3691.82	6680.84	4950.03	6178	8483	5158	6154.68	5778	5954	5035.87	6003	4763	6634	5743	5735	6414.99	7057.94	5774.84	6207	7880	7113	4930.85	5404	4717	4358	5421.92	4917.97	4918.02	4889	5188	3723	3825	4411.92	4680	4535	3693	4635	4317	4855.78	4747.65	5285
484	FBN1	chr15:48752409-48752522	NA	8970.81	9	13206	13478.7	8724	8335	14501.7	11591.5	11257	13191	9954	10802	11060.7	11148	10053.9	11300	10055	11589	9805	10390	11514	12919.9	10408.9	11363	13717	12903	7985	9111	8550	7223	8136	9595	9227.96	7885	10092	6770	7704.9	8107	8691	9069	7223.89	9022	8031.9	8794	8416	9285.97
485	FBN1	chr15:48755223-48755381	NA	22357.1	0	20358.7	20453.2	13743.6	11738.6	15388.5	12362.7	16952.3	21251.5	13463.6	23148.8	14047.7	17160.4	15128.7	16230.2	15855.7	18537.5	16112.8	17840.4	24475	23898.5	16159.4	18334.5	23159.1	20253.1	23299.6	19409.7	14960.6	22013.1	24949.6	20591.6	26063.4	30343.5	16344.4	20076.3	17917.3	22760.5	20828.3	21160.5	15779.5	17395.5	22083.6	20800.6	20341.5	27703.3
486	FBN1	chr15:48755359-48755474	NA	22079.8	0	21849.9	21820.9	14363	13945	24437.9	21351	21035	22248	16951.9	21138	19422	20178	17554	19260.9	16363	20755.9	17390	17443	20705	22068.9	18764	18654	24592	23045.9	19758.9	20604	20735	20678.9	21414	21831	23312	23848	20728.7	14719.9	17967.9	18855.9	20853	20466	19865	23035	21514	23414	19945	23369.8
426	FGFR1	chr8:38271120-38271272	NA	31549.4	0	35864	28782.6	24165.9	20822.7	26560.2	25748.1	25242.1	20522.5	19919.3	28276.4	21580	21624.3	23728.3	21360.5	19269	24417.2	20421.8	18962.7	35294.5	32913.7	24699.4	25531.6	31662.4	27448.5	25002.1	22578.2	22578.8	28561.5	26312.1	29794.3	40308.1	32864.6	25729.9	26756.3	26211.6	24112	36927.9	34953.6	29607.5	34103.3	40153.6	34664.4	26721.3	30574.6
429	FGFR1	chr8:38272363-38272500	NA	12730.1	0	15693.7	13661.9	12218.9	11333.9	14866.8	15526.8	11538.9	11293.9	10081	13364.9	11874	11561	11275.7	11291	9903.9	13212	10392	9966.56	14535.9	15369	12062.8	11745.9	14819	13440.9	10789.7	11054.9	12039.9	11720.9	10463	13865	14321.9	12960.9	11384.8	10603.9	10528	10425	15792.9	14380.4	12702	14120.9	14236.7	14892.9	10384.9	13274.8
430	FGFR1	chr8:38273336-38273490	NA	9311.44	22	11002.5	11648	6416.68	6216.86	9199.62	6519.93	7023.74	6516.94	6270.83	8835.16	5574.84	7062.61	6910.65	7044.58	6772.97	7670.97	7009.63	5842	12709.3	12723.7	9603.4	10276.8	13672.2	10472.9	8096.79	5634.83	6482.79	7454.83	8434.91	8603.58	11451.8	11272.7	8008.72	7968.68	7471.93	7706.35	12268.7	12336.7	8296.87	10724.9	13618.9	10763.7	8580.75	8603.96
431	FGFR1	chr8:38273479-38273630	NA	15156.4	0	15690.5	13979	10433.3	9741.5	13065.1	11094.4	10927.1	10463.4	9791.5	12588.5	9221.6	9904.51	11122.2	10844.1	9297.55	12101.2	9340.59	9193.66	17239.8	16875.3	12764.3	14403.3	18630.8	14508.4	13314.3	10694.1	12252.3	13121.3	12938.2	14533.4	19693.1	17327.4	13698.5	12683.4	12587.5	12845.2	15665.4	16830.1	12254.4	15167.5	17633.2	14944.3	12788.4	14759.3
432	FGFR1	chr8:38274821-38274975	NA	25503.5	0	23338.6	21167.1	17502.1	14757.7	17934.9	19062.4	19546.1	18963.2	15440.9	23426.6	16873.5	18617.4	15073.2	17276	15747.3	18688.9	15523.8	16702.9	24074.7	24284.3	19786.7	18242	21931.6	21111.6	20847.9	19987.1	19020.8	22894.1	21828	26128.8	31737.6	28131.2	21408.8	22062.6	20222.8	22800.6	27569.2	24133.8	21710.9	25955.8	27591.1	26070.5	21824.7	28863.6
433	FGFR1	chr8:38275386-38275543	NA	20748.7	0	22777.1	19551.2	16379	12435.6	16434.2	15631.3	16897.6	18363.1	13770.8	21487	14064.3	16628.3	13942.3	16079.3	16531.1	17919.9	15690.6	16378.5	24551	23969.7	17764.3	18185.8	23057.9	18329.6	19927.7	17316.4	15556.8	21290.8	20372.1	22068	24446.7	27027.6	18277.4	20753.1	17354.3	20580.1	22875.1	21711.6	16952.4	19294.1	26471.9	21573.2	18522	26321.6
434	FGFR1	chr8:38275731-38275857	NA	10272.1	2	12291	11839.9	7602.83	7563.94	12551.4	10779.8	10598	11705.8	8588.89	10239.9	9470.9	9698.88	9861.99	10285.7	8028.97	11644.4	9228	9434.85	11425	12855.7	9625.84	10510.8	12868	11936.8	9284.7	10022.9	9673.88	9036.85	9639.38	10898.9	11451	10943.8	9722	7140.87	8475	9115.72	11425	11646	9131	11756.9	10103.8	11280	9372.83	11631.8
435	FGFR1	chr8:38275806-38275945	NA	19479.9	0	25367.5	24046.7	17636.2	14527.7	21274.7	19545.7	21024.8	17483.5	15385.3	20304.9	17607.8	16712.7	17505.5	17740.1	14832.2	20277.5	16403.8	14935.5	24054.1	25642.2	19474.3	18178.4	22630.6	20708.6	15842.8	17040.9	15690.9	17391.4	16451.3	19927	22492.9	20335.7	17793.8	16006.8	16870.9	16785.8	21551.3	24924.5	17825.8	18602.6	21653.8	20234.8	16825	20888
436	FGFR1	chr8:38277048-38277162	NA	22463.3	0	26833.9	23560.5	18035	17582	27857.5	27011	20051.3	20713	18238	20830	20908	19908	18368	20369.9	16310.8	21214	16631	16788	21928.9	24195	20217	19784	25516.4	24253	17173	20861	21747	20826	18727	23655	24515.8	21308.9	21241	15362	18586	17339.9	23100	22805	21888	28077	23075	25674	18823	21734
437	FGFR1	chr8:38277148-38277306	NA	17995.2	0	23617.8	18887.5	17260	15060.4	15539.2	16046.4	15961.1	14732.3	13003.7	19494.2	12765.1	16166	15364.7	14552.2	14660.5	16603.5	14302.1	14922.2	24361.1	22354.6	16854.8	18348.1	21125.1	18707.6	17031.1	14076.2	13533.5	18079.4	16940.1	19165.2	22206.1	21565.8	13550.5	19101.8	15942.4	17457.1	20939.3	21796.3	15305.5	18515.5	24446.4	19629.3	15704.5	21323.2
438	FGFR1	chr8:38279291-38279425	NA	21000.7	0	24762.1	21987.1	18276.7	16046.8	22511.8	23280.5	18783.6	21864.6	18057.4	21473.4	19455.3	19611.7	18363.7	18790.8	17681.2	21581.8	17083.5	18254.4	23748.1	25077.5	21713.3	20516.7	24657.5	23978.6	20106.6	21229.5	21528.8	21142.5	20828.2	24884.9	23853.5	22712.8	19761.7	16182.1	18140.4	19444.5	24983.8	23578.7	19400	24290.8	24397.7	23600.5	19054.7	24021.8
439	FGFR1	chr8:38279369-38279461	NA	12070.5	3	15325	15639	9869.05	9676.03	17928	16166	11318	12134	10759	10983	12844	11236	9802.99	13467	10359	11696	9351	10614	12061	12813.4	13605	10227	16224.9	15583	8300	10429	12298	9548.01	9210	11750.7	12471	11848	13745	7584.89	10868	8428	11359	10582	10934	14687.9	11617	16912	10765	11100
440	FGFR1	chr8:38282026-38282130	NA	18735.9	0	28803	22578.9	21163	20472	32957	32851.9	19764.6	19274	18321	19718	23005	19431	19689	20764	16793	22218	15710	17316	20467	21804	22588	20716	25335	25037	12807	16905	19950	15667.6	12868	20766	19175	15444	19112	12972	16695	13514	20697	20642	19709	26235	21878	23464	15733	17943
441	FGFR1	chr8:38282101-38282240	NA	27180.3	0	39925.4	31616.3	30655.4	27917.9	36007.8	35262.5	25630.5	24265.2	22998.8	31277.1	25155.5	26995.6	27608.6	26564.5	23516.2	30555.7	24036.5	24080.3	35099.2	36187.7	29905.5	29169	35767.1	31967.5	22122.9	24134.7	23968.7	27185.8	21254.9	31186.9	32361.5	26732.2	24868.6	23978.9	24642	23569	35228.4	34684.7	29674.1	32238.5	37097	30041.9	22713.7	30420.5
442	FGFR1	chr8:38283625-38283781	NA	6096.04	90	6310.97	5354.53	6085.32	4350.46	4508.95	7345.86	4533.86	4191.87	5337.79	5221.68	3903.69	5625.08	4222.06	4618.42	6168.5	4730.33	4532.41	6612.85	6369.66	6341.52	5943.57	5128.45	6308.92	8065.67	8521.8	5708.84	7312.75	9776.46	9903.68	10323.3	6942.56	11281.7	3771.97	6505.69	6319.82	5787.97	5724.78	9315.61	4091.89	6417.66	7193.43	7115.27	5661.55	7986.76
443	FGFR1	chr8:38285432-38285584	NA	16261.7	3	15305.4	14661.3	11002.9	9242.84	12653.6	11158.5	13054.6	14747.8	10939.8	16098.5	11831.6	12930.2	11878.8	12950	10770.8	13048.4	12203.2	12089.2	16741.7	16535.6	12433.7	11426.5	16872.7	14155.7	15931.9	13828.6	11295.4	15158.9	16271.5	13917.7	16578.8	19310.7	11073.8	13710.8	11827.7	14483.5	15834.6	15528.5	11915.7	13028.6	16407.5	15385.7	14204.7	20171.6
444	FGFR1	chr8:38285500-38285660	NA	29272.5	0	28585.1	22749.2	19573.1	14563.7	17769.4	19183.4	18870.5	19784.8	16656.6	24609.4	18113.8	19594.7	18340.5	17940.7	17749.4	21770.5	19013.7	18551.5	31944.4	26564.2	20355.8	17709.6	22938.6	23347	22691.6	21540.5	19178.5	24922.7	28808.6	27425.6	31808	31868.6	20776.6	26756.4	24086.7	23484	28773.4	25795.2	22099.9	22094.5	28064.3	27446.4	21071.6	32542.9
445	FGFR1	chr8:38285832-38285958	NA	25038.8	0	30182.3	27948.3	21420.9	19150.2	29990.9	28419.2	22968	22510.6	19092.9	23362.2	22608.6	21086.4	19672.6	21997.8	16290.5	24397.7	17450.9	17122.6	26724.3	28010.1	24273.2	22306.6	28026	26882.7	19281.8	21303.3	22374.2	21989.3	18870.4	25526.3	27608.8	23214.4	25237.1	17266.7	20704.9	18155.8	28904.3	26692.4	25631	30861.1	27080.8	28303.9	22731.4	24606.9
33	FGFR2	chr10:123239295-123239446	NA	19239	1	28390.9	23187.6	23672.4	16773.3	19847.6	20461.2	20003.4	20727	16483.9	23505.4	18458.5	20380.5	15008.5	18062.3	20722.8	21916.5	17776.5	18644.5	30256	26900.4	22099.4	20108.4	24987.3	24565.3	20289.2	19229.4	15551.9	18950.7	21139.4	21858.6	16405.8	18636.5	15949.7	19853.4	16483.9	18417.4	20821.8	20920.7	16676.4	15212.6	21302.8	20062.2	17022.7	23938.4
34	FGFR2	chr10:123239421-123239571	NA	27981.9	0	27566.6	28249.3	22112.2	18528.9	23550	22539.3	25273	26391.2	19469.3	30386	20914.3	23661.3	22267.2	23203.9	21355.8	25772.1	21797.9	23773.9	33481.1	32955.8	26255.2	25184.6	31921.2	27377.9	28374	26448.6	20170.5	27954.7	29711.1	27469.5	34273.1	34586	25402.5	24577.9	23600	27806.6	26403.8	27118.4	22658.9	23970.1	29830.6	27996.2	26510.9	33481.3
35	FGFR2	chr10:123246857-123246944	NA	9255.07	16	12386	14071	7573	8104	15535	11327	9758	11803	9152.8	9689	10385.9	10203	8833	11254	9606	10294	8463	8918	9672.99	10694	11930	9356	13707	13196	6362.86	7386	8452	6603	6723	7238	9335	7956	10731	5584.84	7289	6712	7344	6648.99	7336	9423	7473	10639.9	7755.99	7851.99
36	FGFR2	chr10:123247470-123247616	NA	20890.1	0	19321.5	20109.8	14485.9	11956.9	16511	14728.3	17332	22437.9	14582	20900.7	15198.8	16486.2	10984.7	17060.8	14525.6	16973.7	16414.2	17550.8	22757.3	21891.7	16068	17341.6	21611.3	19789.6	19936.7	19680.9	13613.9	20116.9	22620.8	18206	16837.9	26696.9	16893.8	17841.9	16339.8	21232.5	18540.9	20199.9	15592	16315	19405.9	19760.9	19541.9	25021.9
37	FGFR2	chr10:123256045-123256184	NA	11349.1	16	15855.7	14943.9	11888.9	10042	14174	12239.8	12032.8	13586.6	10980.7	13814.7	11200.9	12737.5	10802.7	12273.8	12272.7	14222.7	11968.5	12107.6	17442.6	16315.7	12816.8	13027.5	16645.7	14704.8	11322	11185.9	9645.73	10843	11166.9	11685	12147.9	11419	10476	10746	9546	11422	12421.9	11446.9	9648	10738	12866.9	11909.7	10370	12429.9
38	FGFR2	chr10:123256112-123256248	NA	16426.4	1	20747.7	22301.9	15668.9	14269.8	21237.8	18453.9	18883.6	21331.8	15937.9	20969.7	17066.7	16996.1	17483	19042	15596.8	20831.8	16873.9	16712.6	22655.9	22871.7	18707	18866.9	23153.6	20833.6	14987	18143	14652.9	15122.9	16461.9	18455	20403.6	16694	16149.7	14384	13238.9	16161.8	17307	17880.7	14049.8	16312.8	16909	16752.7	15503.9	19598.6
39	FGFR2	chr10:123257998-123258157	NA	25419.9	0	25354.1	24677.1	20550.6	14348.7	17943.5	18031.4	21149	25082.9	17307.7	29912.4	17381.7	22067.1	19178.8	20389.6	19776.7	21976.3	19312.4	21024.8	30313	26937.3	22439.3	19646.2	24034.1	22324.9	25969.2	22518.1	16698.3	26653.1	26179.9	24170.8	28481.1	30109.9	17799.8	23881.6	19110.6	25932.7	20824	21063.7	18714.8	17515.2	21935.3	22256.4	22028.9	29732.1
40	FGFR2	chr10:123260325-123260476	NA	34208.6	0	37232.3	30802	29004.8	23296.1	26468.6	30155.6	26722.3	25441.3	22304.4	31126.8	22641.2	25851.7	23419.6	22522.8	21579.8	26744	21091.6	22186.1	35978.9	35561.5	28973.2	27754	33507.8	31976.5	29553.1	29416.6	27376.7	36800	30647.6	34685.3	39875.9	39886.4	28619.6	33070.8	30113.3	29910.7	40674.4	39289.1	33798.1	39134	45682.8	39529.4	30239.1	40626.7
41	FGFR2	chr10:123263294-123263447	NA	23350.2	0	21703.5	20996.5	15447.6	12089.9	17672.7	15017.8	18253.1	21138.6	14990.7	22265.6	15292.5	16955.4	15973.5	17520.6	14210.3	19002.7	17141.5	17137.7	24675.2	23327.5	18891.6	17148.3	23503.4	20677.5	21355.5	20284.5	16685.9	22681.7	23343.9	22877.7	25648.7	28438.6	15825.9	19232.7	18988.5	20741.8	23633.7	22802.6	18161.9	18964.7	24280.6	20832.4	19606.4	26386.6
42	FGFR2	chr10:123263402-123263545	NA	24571.5	0	22285.1	21072.8	16092.2	13806.5	21612.7	17105.3	21212.3	24944.9	15940.6	24515.9	18202.2	19025.1	17555.3	19949.4	15142.3	21977	18966	19980.4	27331.8	24294	21582.5	19378.2	26429.5	24312.1	22712.1	23689.9	18347.5	22739.4	24448.2	24439.3	28871.2	28518.8	19027.3	19189.4	19835	23599.4	26391.9	25202.2	21802.4	22693	25477.4	24945.8	21586	29017.9
43	FGFR2	chr10:123274602-123274737	NA	11446.5	4	10546	11085	7521.92	6594.92	10627.7	8884.85	9536	12085	8839	10598.9	8977.87	8917.98	8781.93	9580	7866.82	10782.9	9214	8701.98	11280	12799.9	9411	9451	11827.9	10776.9	9601	11795.9	8825.9	10422.9	10433.9	10792.9	12486	12959	9273.86	7811.98	8659	9905.78	11230	11753	9999.88	11002	10824	11455	10087	13145
44	FGFR2	chr10:123274730-123274887	NA	28735.5	0	27163.1	25622.4	19996.5	16854.8	21575.3	18893.7	25365.5	25264.3	18804.6	28279	18516.3	22119.3	20716.5	20836.6	20449.2	22617.9	19903.4	22179.4	32414.2	30107	22513.4	24360.3	28382.1	25711.1	28852.6	25776.1	19966.3	27983.3	28571.3	29058.3	36439.1	35271.2	24387.5	26142.4	23391.3	29148.4	29168.3	28191.1	23242.6	27665.4	31709.1	27579	26827.5	36923.8
45	FGFR2	chr10:123276829-123276976	NA	17191.8	4	19719.2	21373.4	14497.7	12307.7	17546.9	14087.4	16850.8	21625	14740.5	21260.7	14768.4	17716	16379.9	16947.7	16011.2	20145.1	16434.5	17745.3	24519.7	22387.8	16676.6	19314.1	24919.6	21354.9	17900.8	16786.8	12029.7	15343.7	17259.8	16219.6	18577.5	18986.5	14321.2	15695.4	13877.3	17921.8	16832.6	16135.3	11791.5	13621.8	17030.4	14937.5	15686.7	19266.5
46	FGFR2	chr10:123276925-123276979	NA	6773	82	11035.5	11756	7824	7965	10783.7	10933	6126	4789	5988	6747	7853	6741	5601	8759	7568	6328	4547	5932	7021	7561	11297	7026	11263	12177	4381	4543	5975	5617	4651	5195	7600	7383	7257	5279	6712	4835	5511	4883	6782	8718	7637	11039	5302	5048
47	FGFR2	chr10:123278197-123278347	NA	11767	22	16518.9	15180.7	11836.5	9475.55	12998.6	11040.9	13209.7	15285.5	10028.3	16428.1	11719.7	12615.6	12576.6	13099.7	11878.4	14652.7	13488.5	12760.7	19371.7	18191.2	13752.7	12843.6	17460.4	13951.3	11807.5	11538.3	7692.89	11602.5	11774.7	10577.7	13508.8	12532	8587.87	11582.8	10129.8	11887.7	11866.8	10980.4	8219.58	8355.95	11629.5	9982.66	11246.6	13852.6
48	FGFR2	chr10:123279481-123279643	NA	19200.3	3	21866.1	20561.1	16515.8	13666.7	16275.7	15561.7	16941.8	17963.3	14157.6	22515	15215.7	18062.1	16123.2	16566.4	16782.4	19436	15969.5	17298.4	25595.4	23719.8	18726.3	17981.7	22159.3	19319.4	19490.6	17538.3	14908.3	18197.4	18608.5	18177.7	21974.7	21579.4	13470.1	18373.8	15477.3	19290.5	19148.5	20014.5	14470.7	15572.1	21326.3	17556.4	17666	22372.1
49	FGFR2	chr10:123279547-123279684	NA	18056.7	0	26083.8	21963.7	19923	19037.7	24572.7	22487.7	18897.7	18715.6	16622.9	20850	19063	16861.6	19482.2	18868.9	17727.9	23382.3	18016.8	18265.9	24789.4	23941.9	18718.8	20574.7	26350.8	22965.6	15354.9	16895.9	14987.9	15949.8	14708.8	19538.7	20203.2	17532.8	17482	15685.9	15129	16203.8	19981.9	21627.7	16407.2	18110.8	19662.8	18828	15612.7	19366.9
50	FGFR2	chr10:123279598-123279714	NA	12759.7	0	14641.9	13750	11206	10166	16079	15462	12295.9	12448.9	10473	11305	11440	11177	11697	11409	9786.98	12425	9189	10180	12080.9	14229	11780	11651	13421.9	13417	10884	10965	11300.6	10589	10300	12800	12865	12178	11391	9468	9930.97	9874	12784	13576	11810	14562	13064.8	13751	11218	12468
51	FGFR2	chr10:123298059-123298215	NA	22080.2	0	22898.2	20661.5	17734.2	15056.5	16939	17237.3	18618.7	20691.8	14294.6	22830.3	16999.5	17794.3	16504.6	17241.6	16743.3	18725.2	16216.3	18245.4	25645.5	26091.2	17876.6	18419.5	21984.2	18878.4	22476.3	20432.1	14757.1	22769.2	22793.6	19542.3	25339.5	26581.2	15468.7	18679.4	18400.2	20877.3	22081.2	22297.6	16951.2	17549.1	22660.4	19280.3	18889.7	28307.9
52	FGFR2	chr10:123298200-123298317	NA	18151	0	20111	19136	12751.6	11261.9	22464.9	17352	17317.8	22059.9	15136	19195.9	17292.6	16963	15774	17815	15704.9	18158	16157	15791.9	18697.8	18228	16430.8	14333.8	20579.9	18599	13894	16653	15758	15748	16500	17588	18774	18239	19745.8	11785.9	15687.9	14243.9	17118	16412	16194	18016	17388	18976	16024.8	18987.9
53	FGFR2	chr10:123310802-123310958	NA	18216.7	3	22182.5	19042.2	16806.1	14564.1	16476.2	15443.2	16497.2	17880.8	14840.6	22159	14163.1	17814.5	15655.2	16239.3	15847.4	18067	15655.4	17677	25764.7	24389.1	16779.5	18411	22045.2	19692.4	18169.8	16234.3	13162.4	17550.3	17980.3	17526.2	19903.5	20434.7	13318.9	19308.6	14587.5	18029.5	18161.9	17899.5	13199.4	14191.6	20304.8	17739.5	15719.8	21302.4
54	FGFR2	chr10:123310857-123311016	NA	25475.4	0	24313.4	25114.9	17671.6	16448.5	17857.4	17043.2	20453.1	22373.2	15966.5	26332.6	16754.4	19176.7	18205.7	18321.3	18270.4	21067.5	17461.7	18436.3	28055.8	27237.9	19785.3	21004.7	25743.8	21668.5	23558.2	20494.7	16680.7	24711.4	24840.1	23999.3	31384.3	32451.2	20148.8	23406.4	20819	24140.7	25819.8	25369.6	18734.5	21061.7	27340	24008.7	21912.6	31395
55	FGFR2	chr10:123323994-123324099	NA	12411	0	18682	17327	12018	10646	20594	17414	12969.9	14519	12065	13710	15100	12981	12863	15157	12252	14012	11337	11127	14627	15785	15632	12401	18510.8	17138	8894	11261	11161	10366	9338	12319	13883	11018	15874	7865	10932	8663	12989	12407	12284	13548	11923	14688	10909	11392
56	FGFR2	chr10:123324941-123325055	NA	19488.5	0	24663.8	23716.4	17275.4	17799	26796.7	23481.8	18287.8	17643.7	16447.6	19203.3	19586.9	17615	18065	18686.9	15559	20376	15372.8	14677	20437	22627.4	20963.1	19179.6	24306.7	21868.5	13399.7	16909.4	18160.8	15978.7	14621.8	21222.8	23253.6	17853.7	23735.7	13726.8	16494.7	14214.9	21337	20155.9	20131	25116	20431.9	21514	16782	17430.9
331	FGFR3	chr4:1801105-1801266	NA	20211	0	26791.2	20527.1	17167.6	18204.2	19339.1	18265.9	16074.4	11836.8	13143.5	18174.6	12623.6	15473.6	17000	13560.1	15463.1	16764	13645.6	12485.5	25999.7	23816.2	17264.6	20023.3	22383	18866.1	15740.5	11386.8	13623.8	16634.3	15088.6	18209.5	28428.3	21447.3	18031.1	18253.5	16872.5	15767.8	24772.1	24501.5	18495.5	24024.3	28380.8	21523.3	15835.7	16621.7
332	FGFR3	chr4:1801457-1801583	NA	22620.1	0	32087	23842.6	22918.9	22636.4	31888.7	31593.5	20136	16101.8	17608.8	20489.9	20491.8	18051.2	19799.8	19190	16332.8	22069.3	14979.8	14766	23932.8	23418.9	23175.8	21983.6	27215.8	24281.8	11834	16872	20619	17619.9	13630	22677.9	24357.8	18003.9	22862.9	15579.9	20135	15005.9	27715.7	26094.9	25122	34271.9	29640	26908.4	16245	17730
333	FGFR3	chr4:1803074-1803199	NA	17275	0	24083.7	20434.7	17376	16428.9	24281.2	23376	15429	14592.8	14447.8	15767.4	17078	15597.9	16946.9	16087.9	13247.6	16307.9	13577.1	12472	18304.9	19925	17819.9	16171.8	20281.5	18997.7	11556	14441.7	17102	15218.9	11552	18245	21200.2	14877.8	17887	12531	15416.3	12811	22484	20513	20673	24231	21034	21002.9	14500	16841
334	FGFR3	chr4:1803115-1803278	NA	8722.11	25	11754.7	9648.32	8470.34	7638.88	8972.43	8696.51	6391.26	5538.63	5518.64	7758.21	5852.52	6066.54	6393.4	6775.23	6720.51	6548.57	6023.44	5086.71	11482.4	11721.5	8896.76	7925.71	10534.5	8419.9	7576.35	5490.84	5919.58	7458.43	6648.49	7350.72	9971.32	9781.54	6530.6	8581.63	8001.6	7427.64	13009.1	12605.2	8612.28	10864.3	13648	10192.5	7483.68	9159.38
335	FGFR3	chr4:1803329-1803458	NA	11506.5	2	23054.9	17001.5	15510.4	16936.8	22370.6	19359	8979.95	8569.85	9864	9801.68	10271.8	9696.92	10838.9	11515	10556.6	12089.7	9558.98	7607.9	16908.7	17798.8	16686.5	15672.9	18824.9	15670.7	8385.86	7778.96	11273	8252.93	7286.93	13250	13487.9	11090	12828.9	10569.9	11611.9	8140	23039.9	18289.8	16632	25083	23885	17909	10318.9	9951.95
338	FGFR3	chr4:1803651-1803801	NA	15797.5	0	26973.3	22337.8	24145.6	21843.6	28260.7	26439.2	14533.7	13571.8	15552.2	15798.5	16687.7	16448.9	19720.3	16831.5	16554.8	18266.2	13890.7	14174.5	21116.6	24850.6	19056.6	19242.9	24096.9	19153.8	13153.9	13277.9	16714.9	15684.8	12299.7	18409.8	20786.6	14916.8	15284.8	17713.4	15612.9	14503.6	24059.8	26590.6	20816.7	25361.8	30763.5	20089	14168.7	17495.9
339	FGFR3	chr4:1804632-1804789	NA	15954.1	1	18909.5	16716.5	15931.7	13106.2	16751.4	16397.6	10366.6	13319.7	13431.4	13377.7	13002.7	15132.7	11068.6	14668.6	13919.5	11187.7	13257.4	13646.5	14367.8	21324.1	16063.8	11709.9	14792.1	13249.6	15110.7	13474.6	13366.7	16260.3	13873.7	18116.8	22061.8	18054.2	14065.7	17280.7	15227.8	15766.7	21748.1	21280.9	17144.4	19595.6	21610.3	18600.6	14306.8	20353.4
341	FGFR3	chr4:1805365-1805529	NA	14788.1	11	15210.7	14748.9	12351.1	9761.32	13293.5	12840.3	9143.39	12618.2	10658.4	12857.3	10847.1	12147	9226.43	11890.1	12590.9	10294.6	11029.4	12539.5	14079.2	17715.9	13649.8	10806.1	15082	13956.2	14354.3	11564.5	10726.2	14684.6	12929.6	14891.2	16791.6	18585.1	10953.4	15209.3	12326.2	14801.3	17836	15916.1	12105.6	14395.9	19460.7	15312.1	12832.3	17798.8
342	FGFR3	chr4:1805501-1805644	NA	17507.2	0	19150.5	18379.6	15292.5	12414.9	17804.7	17214.6	12079.6	16149.8	14253.6	14072.7	14319.6	15890.2	13207.8	14841.7	13822.7	13202.3	13549.8	14751.8	16693.5	21155.7	16789.4	14464.4	17671.3	17691.5	14950.6	14907.5	15728.7	15418.7	14901.5	20149.6	21989.5	18817.4	17423.7	15390.7	15638.6	16462.3	22392.6	21505.7	18341.7	22583.5	23504.3	19279.4	15230.6	20000.8
344	FGFR3	chr4:1806152-1806256	NA	14548.9	0	22059.1	19495.8	15328.5	13405.7	24543	23129.8	13487.8	13652	12807.8	12380	15564	13644.8	12650.9	15245	12117.8	13798	10763.8	11268	13475.8	17392.7	17651.7	12421	18628.8	19251	9445	12210	14502	11983	9501.75	14398	15409	12329	17001	10133.8	13099	9597.86	17356	16550	18017	21702	18631.8	19142	12144	13172
345	FGFR3	chr4:1806512-1806672	NA	24989.7	0	33993.5	25224.3	27955.8	24232.3	24954.2	26656.6	20102.1	18705.6	19258.4	23694.6	19617.4	21257.2	20623.2	20343.1	20753.4	21393.3	18059.2	19386.4	28686.1	30934.1	23671.6	22558.5	25531.9	23154.2	21318.5	19629.8	20593.3	26696.6	20440.3	26788.5	29941.3	28245.4	19252.3	26373.5	23470.7	22880.5	31613.5	30408.2	25584.5	29341.3	37327.1	29035.5	21068.6	30001.5
346	FGFR3	chr4:1806557-1806719	NA	19416.5	0	21869.8	17213.4	16990.7	15116.2	17163	16373.3	13128.6	11069.8	11568.1	15725.7	10997.8	13260.1	14815.6	12668.4	12597.2	13554.6	11443	11221.7	21187	20262.4	16099.2	16432.4	20396.4	15929	15494.4	11469.1	13120.4	17073	13712.5	16247.7	26900.4	21142.2	15678.8	18296	16588.8	14838.4	24681.4	23183.4	19070.8	24267.5	29476.9	21656.4	15536.1	18973.5
349	FGFR3	chr4:1807217-1807385	NA	22181.2	0	26274.6	20156	19445.9	17644.1	18443.7	19173.6	16574	14098.4	14480.5	20228.2	14336.9	15821.7	16893.1	16479.4	16169.7	17640.9	13896.3	14904.1	25158.2	23796.8	16738.7	17788.1	21831.5	18723.1	19637.4	16345.2	17745.7	23186.3	18440.6	22759.4	29025.5	27638.2	17757.1	25294.3	22122.4	21267.6	28536.3	27853.4	19785.1	25184.8	33022.3	25470.4	20581.7	24937.5
350	FGFR3	chr4:1807359-1807513	NA	9764.12	42	12792.5	9642.17	9154.2	8308.36	10277.3	9968.34	7985.53	8913.24	7844.54	10730.1	8093.51	8466.02	8572.59	8486.6	8793.15	9939.12	8020.29	8623.14	12600.3	12039.3	9592.08	9771.88	12181.2	9796.9	9204.22	8318.04	7406.66	9756.36	8794.43	9107.32	10227.5	10746.1	6912.57	10288.5	8330.2	8658.46	11324.8	10424.8	8164.95	9900.97	12404.7	9723.89	8361.79	12091.1
351	FGFR3	chr4:1807470-1807592	NA	18949.2	0	22605.7	21199.4	14586.7	14919.8	25336.7	20464.1	16082.4	14690.8	14645.6	15179.5	15451.7	13654.3	16519	15650.5	12760.8	17490.7	12855.6	11404.5	19066.9	19948.2	18293.5	17211.9	21414.4	19688.8	11351.9	13169.6	16285.3	13248	11253	17885.6	21317.4	16555.8	20818.5	12300.8	16198.8	12785.9	22477.6	20424.7	18677.6	26857.2	21275.3	21935.4	16104.8	15608.7
352	FGFR3	chr4:1807531-1807681	NA	6660.38	77	7794.43	7644.69	4760.34	5038.7	6794.66	5634.66	4433.61	4832.91	4465.62	5231.91	4383.36	5594.83	5681.25	4907.85	5390.52	5388.48	4985.32	4491.26	8029.36	8051.48	6742.09	6622.63	8152.5	6692.46	5330.7	3482.52	4500.99	4637.5	5136.51	5770.7	8124.34	6470.75	5249.71	5817.61	5374.87	5721.93	9023.84	6932.91	6486.88	8896.95	10207.8	8071.87	5951.83	5892.65
353	FGFR3	chr4:1807763-1807926	NA	7669.5	50	6493.73	6799.77	4200.04	4184.36	5537.04	4038.73	3815.17	3941.84	3911.82	5298.51	3891.6	4013.09	3664.43	4098.87	3991.84	4682.76	3802.24	3298.75	7614.01	8212.13	7752.52	6513.52	7691	7014.52	5587.57	4376.87	4099.82	5111.85	5569.8	5729.84	9851.99	8375.76	6199.09	6355.75	5726.62	5943.73	11294.6	10694.5	8602.23	10569.7	13658.5	10016.1	6678.61	6916.81
354	FGFR3	chr4:1807974-1808057	NA	9991.84	28	21243.6	16258.2	14672.2	16679	22469.8	22311.7	9759.32	6728	8946.18	9371.02	12122.7	8914.02	10160.3	12446	10380.7	9936.24	6843.57	8091	11938.7	12231.1	15965.5	12028.4	17289.9	15111.3	5302.14	6891.57	10769.6	8219.87	5281	9390.3	11573.6	8619	12468	7807	10115.1	6199	12122.1	10879.1	12895.6	21131.9	16504.6	19607.7	9087.3	7840
355	FGFR3	chr4:1808937-1809072	NA	11076.6	0	14826.7	12640.8	10561.8	9935.91	13557.5	12837.8	10447.8	9607.74	9157.85	10613.9	10223.9	9642.45	11017.8	10431.7	8742.87	11510.8	9374.76	7983.45	13880.4	14249.6	11940.8	10955.4	13285.8	11435.9	8670.52	8815.9	9546.9	9302.71	8307.89	11474.9	12662.7	10001.8	10416.8	8617.7	9539.94	8314.78	14125.9	13897.9	11601.8	13960.8	12987.5	12557.9	9149.88	10931.7
181	GAPDH	chr12:6645620-6645768	NA	24537.2	0	29745.6	24342.8	21158	18645.4	23176.3	22296.8	22506	22478.1	18089.2	25904.6	18578.4	20599.1	21146.3	20249.4	19484.2	22140.5	18467.3	18172.4	30121.7	30616	23522.2	21826.8	26055.2	26034.4	22327.3	21734.4	19375.2	24525.3	21414.1	25401.9	29872.6	27178.5	23223.3	22404.3	20482	22246.2	27529.8	28457.3	21963.5	24384.3	27436.4	25908.3	21863.5	29529.2
182	GAPDH	chr12:6645816-6645973	NA	21994	0	26506.9	24746.1	19097.3	16339.5	19701.2	19027.1	19575.3	21059.4	15809.6	25029.3	17057.9	18799.5	18317.5	19629.2	16841.4	20624.7	17854.1	19615.6	28872.7	27421	19994.5	20651.3	26585.2	23409.8	22711.2	20706.6	16487.6	23445.4	22388.4	22911.6	27302.9	27120.4	16813.8	22395.5	19839	22759.8	25613.7	23551.8	18863	20178.3	27753.4	23857.3	18886.6	27636
183	GAPDH	chr12:6646264-6646421	NA	37059	0	40527.6	35368.8	31912.3	26342.4	28979	31985	29417.3	25971.8	23838.1	37556.5	24694.1	25334.9	28751.2	26327.6	24224.1	32130.4	24673.8	26124	42469.9	41014.3	29289.7	31241.5	36614.8	32740.5	32453.4	30428.8	26244.3	36998.3	32787.9	36077.4	50118.8	43146.6	30186.3	35884.1	32701.6	32584.6	41664.8	39644.9	33165.2	38355.7	46482	40974.1	32602.7	41438.7
184	GAPDH	chr12:6646819-6646977	NA	23289.6	0	26700.4	20289.3	21529.2	20256.2	19168.6	19475.8	18325.8	16932.1	15736.1	23113.4	16062.6	17015.3	17092.2	17326.5	14918.9	20032.7	15393.1	17472	26488.2	26196.4	21233.7	19963.2	21975.1	20404.4	20287.1	19757.5	19332.3	24297	19401.6	24239.1	29608.7	25527	15813	23527.3	20028.1	21911.9	27659.7	26856.8	21619.9	24902.7	29875.9	23113.8	18349.1	27698.2
185	GAPDH	chr12:6647010-6647151	NA	12193.2	2	18730	15510.7	14920.7	10485.8	15458	15681.3	12291.6	13053.3	10814.1	14002.4	12188.7	12179.1	10347.5	12470.4	9295.39	15143.7	10965.6	10653.9	18040.6	18288.5	15035	12321.8	16447	16048.2	11057.4	12724.4	11603.9	12194.4	10883.2	15161.6	11415.8	12898.5	9914.68	12316.5	11122	11620.1	16981.4	16746.3	12753.5	12885.5	15586.2	13814.3	10762	14529.3
283	GNAS	chr20:57478718-57478863	NA	21738.8	0	25087.3	23298.6	18900.7	17811.4	20286	22065.6	19628.6	21405.7	16862.7	23280.6	17919.3	19920.7	18119.7	18643.4	17260.7	23058.8	16905.6	18443.7	26156.1	27285.5	21044.5	24363.3	23629.6	23730.6	20841.8	21303.7	18273.8	21848.8	21218	25084.1	24809.8	25258.7	19801.8	20712.6	18539.8	20206	27063.8	26809.5	21802.6	26249.6	28792.7	25363.9	19151	26122.9
284	GNAS	chr20:57480418-57480549	NA	24703.4	0	27433.6	26240.9	21399.8	19173.9	26750.9	25125.9	24446	22411.7	20739.9	25567.8	21871	20596	21503	22927.9	20010	26225.9	19781.8	20143.9	28070	30250.3	24067	23517.8	27705.8	26934	19882	24924.9	22799.9	23177.9	20190.9	27844.9	30051.9	24998.9	26408	19077.6	20540	19755	27376.9	27774	23580	24226.9	24646.9	25174.5	22810.9	25828
285	GNAS	chr20:57484211-57484327	NA	15387.2	0	20607	19492	14193	11430.9	23017.5	18496	15653	19122.8	13927	15894.2	17240.9	15512	14613	16671.9	12007.9	18096	14182	12968.9	18156	19262.7	18642.9	15344.6	22252.9	20381	11859	14400.5	13428	12595	12519	15965	15007	14542.5	14658	10171	12676	11303.9	17254	15023	15030	15325	16039	17200	13509	15082
286	GNAS	chr20:57484386-57484529	NA	18228.6	0	19479.3	20475.9	13008.8	12085	18639.7	14917.8	20345.8	21297.8	14496.6	20676.9	15232.6	16752.3	15725.7	16910.5	14855.5	18642.8	15441.8	15618.7	22424.8	23643	16743.7	17579.3	23419.7	19956.8	17668.9	18659.5	15633.7	16812.7	17919.9	19526.7	21762.8	21525.9	19262.7	14285	16232.9	16951.6	18570.8	19256.8	15399	16546.8	18125.3	18622.8	17489.8	21212.9
287	GNAS	chr20:57484569-57484650	NA	12256.6	11	25296.8	18962	18267	20266	26655	29284	12385	9477	11815	13045	16492	12316	13048	13940	12977	13179	9557	10629	14337	15286	20203.9	14753.8	20287	19097	7175	9360	13231	10112	7139	12303	14272	11086	14376	8763	12120	7424.01	14469	13830.8	16047	24215	18176	20787	10303	9489
117	HMBS	chr11:118960364-118960475	NA	10437.5	39	10330	9359	7908	7895	10924	8083	7125.88	7378	5777	12581	9095	6892	6674	6463	6294.99	8743	6397	5759	7932	8607.89	8865.99	8533	8719	6881	5055	6487	6056.94	9925	6317	7531	7467	5451	7429	5150	6749	5234	7246	7094	7657	9631	7432	6698	5402	6104
118	HMBS	chr11:118962122-118962274	NA	17905	0	24562.6	20002.8	18069.7	17080.6	18753.7	19361.5	17382.6	17110.8	15123.5	21287.5	15096.7	17613.8	17903.9	17199.1	15803.6	19526.9	15316.8	16010.8	24616.7	24508.7	17343.5	19423.6	21903.6	19694.5	16629.9	15891.8	15117.8	18849.8	16165.8	19467.7	24961.8	21230.9	15541	17911.9	15142.7	17812.7	20652.8	21606.9	16505.9	17799.8	22234.8	18364.8	15071.8	21694.8
119	HMBS	chr11:118963112-118963267	NA	24928.6	0	30631.5	26569.8	21859.3	19032.7	23626.3	23070.1	22462.5	21592.1	19754.6	28588.8	19007.5	22197.6	22336.8	21172.6	20511.5	24892.4	19644.8	21719.5	31957.1	31300.5	25139.4	25435.3	30748.4	25851.6	22790.5	21062.3	20057.5	24485.6	22602.7	25932.5	33569.4	28022.5	22231.6	23747.4	20095.7	23465.5	28886.5	27930.6	22203.6	24638.6	33348.4	27744.6	21441.7	28587.3
120	HMBS	chr11:118963805-118963936	NA	27868.7	0	32572	28954.3	25499	21787.6	30513.5	31012.7	25115.8	24675.8	21288.5	27898.3	25083	23842.1	20916.1	24491.5	18775.3	27324.2	21715.3	21530.8	29722.7	31612.6	27134.5	25455.9	29949.4	28810.8	22836.2	26675.5	25096.9	25922.8	23127.5	29148.6	27473	27108.7	21388.7	21708.8	25031.9	23017.7	32372.9	31816.9	28065.6	30285.6	30261.7	29017.6	22705.7	31325.4
126	HRAS	chr11:532631-532758	NA	23839	0	33902.7	28228.8	26677	23833.6	33607	33255.9	22034.4	20789.9	20145.9	24159.9	22606.9	21018.9	23829.9	22401	18852.8	25897.7	18057.9	17602.9	26207.8	28813.9	24469.5	22170.1	28994.7	27020.9	15697.8	19542.8	23333	20581	15463.9	25745.9	27825	20210	25194.8	18564.9	20258	18112	30278.8	27905.9	26232	31280.8	28954	28241.9	18840.7	21981.8
127	HRAS	chr11:533280-533366	NA	7278.37	62	9915	9855.16	5667	6250	10762	9750	5307.95	4488.93	5113	5495	6394	5293	5115	6386	5885.74	5467.74	4149	4567	6296	7167	7781	5697.94	8848.92	9205	4015	3823	6950.9	5332	4431	5878	7366	6224	8491.82	4688	6704	4551.94	7338	7164	7873.62	13343.9	8137	11433	6573	4893.99
128	HRAS	chr11:533443-533586	NA	25080.2	0	33859.7	26024.5	28755.8	24997.2	28963.4	30386.8	21726.3	20190	18777.2	25807.6	21808.9	23424.2	22284.6	21103.9	19997.9	24272.7	19412.9	19801.2	31103.3	30167.8	23864.6	24495.1	26707	26359.3	20412.9	20830.8	25018.2	26714.6	21281.2	32250.3	32809.8	24049.9	23997.3	25430.6	25159.9	23621.9	34248	34575.3	28280.9	31525.6	34398.3	27808.1	19862	27533.4
129	HRAS	chr11:533529-533623	NA	5470	120	9471	9591	5472	5305	11076	8081	4441	4299	4459	4529	5767	4343	4825	5803	5118	4453	4210	3902	6039	6846	8011	5745	8757	8692	2976	3518.82	5713	3664	3512	4977	6399.77	4808	6859	3323	5171	3336	6884	6542	6605	9384	8015	8755	4409	3994
130	HRAS	chr11:533765-533906	NA	17012.3	0	18332.7	17163.3	15688.7	13092.8	19303.5	18716.7	13418	14897.9	11755.8	14781.9	14244.8	14618.8	13982	13769.7	11181.9	14317.9	11665.9	12958	16242.7	18954.8	14578.8	12953.6	16273.4	17383.6	13531.9	14845.8	16990.9	16458.9	15488.7	18946.7	23270.4	17800.8	15307.8	15906.9	17307.9	16802.9	21510	23659	20133.8	20377.6	19450.7	18526.7	14698.9	20540.7
131	HRAS	chr11:533798-533948	NA	21309.5	0	23771.5	21326.4	19952.4	16058.2	21329.3	21471.6	15865.2	16611.7	14587.9	20090.9	15951.5	17160.2	16430	17514.4	16116.8	17541.9	15185.9	16495.6	22763.8	23639.3	16704.9	15986.4	20825.2	21050.8	17950.8	17282.7	21082.4	21728.9	20641.7	23047.5	28161.7	22704.6	18682.7	21059.6	20164.3	20573.5	26008.5	30073.7	22053.7	23820.2	25650.6	23218.5	18843.5	24862.8
132	HRAS	chr11:534162-534312	NA	15375.9	2	16699.8	16383.8	14816.7	12711.6	16774.7	14821.8	12014	13810.5	10067.9	13827.6	11820.9	13168.5	13333.7	12450	11907.9	13128.9	10992.5	11485	15964.9	17510	12083.7	13530.6	15594.7	16016.7	12546.9	11844.7	16466.8	16324.7	14281.9	17514.9	23683.9	16697.1	14432.9	16115.9	14083.9	14579	20422.8	24943.7	17294.2	18156.3	19741.5	16209.8	14198.7	17790.8
492	IDH1	chr2:209113045-209113142	NA	8526.81	13	8731.98	9641	5450	5166.95	10133.8	8221.98	7636.78	8470.7	6768.96	7298.74	7590	6973.76	6323	7843	6082.79	6925	6017	6508.97	7177	7625.99	8404.8	6413.96	9122.96	9293.97	6632.98	7906	7693.79	7478	7905.77	7686	9306	9170	9525	5062	7136	5960.36	6995.99	6658.97	7000	9644.99	7538	10833.8	7786.72	7725.99
499	IDH2	chr15:90631825-90631986	NA	14899.1	4	19092.4	17683.3	13094.1	11556.9	13670.2	13013	13798.6	14316.3	10410.6	17489.1	10611.1	12401.9	11741.4	12624	12797.2	13900	12214.8	12234	21780	20568.1	15619.7	16133.6	19633.6	16704.6	14720.2	12819.5	9865.38	15188.2	15167.8	13513.3	17566.5	19445.5	12698.8	15719	12946	13864.9	16739.9	17994.4	12677	14535	20823.3	16315.5	13466.8	18884.8
464	JAK2	chr9:5073732-5073793	NA	8404.02	48	12297	13372.7	9319	8710.02	12493.8	11680	7825.02	7416	7082	9036	9499.9	9139	7165	9799	9105	7844	6188	8118	9356.9	9413	12411.8	8446.02	12387.3	13814.8	6213	6245	7526	8604	7515	7042	10206	9330	9170	5251	7123	5655	6072	5334	7210	9574	8050	12583	7312	6450
74	KAT6B	chr10:76788203-76788356	NA	19733.7	1	17954	19009.5	11770.8	11141.5	14204.9	11841.8	15595.4	18611.4	12941.6	20368.6	12648.7	15785.3	14105.5	15279.6	13956.8	15731.6	15185.2	14825.7	20899.3	20527.6	15314.8	15641.4	20098.3	16833.5	19327.2	16033.6	12763.7	18116.7	20728.5	16771.8	21596.5	26095.5	14485.1	17321.3	14996.3	20367.5	16931.6	17556.7	13055.7	15056.7	19367.5	17701.9	17858.3	23250.5
75	KAT6B	chr10:76788335-76788486	NA	16886.5	6	16083.8	14385.9	11429.8	7862.9	12069.8	11571.9	13477.8	15974.8	9254.76	16415.3	11964.7	10616.5	9129.78	12916	10584.8	13608	12152.9	11481.7	18749.6	17412.4	13173.7	11984.7	16058.8	16256.3	17292.7	14840.8	10161.9	16171.7	18442.9	13254.8	14717.9	22173.7	10936.8	15409	13738.8	16024.7	16446.5	15649.7	13137.6	12126.9	16655.8	16666.5	13929.8	21600.4
76	KAT6B	chr10:76788433-76788573	NA	28556.6	0	27070.9	27368.6	21011.7	16942.9	24962.5	23993	26246.8	25061.7	18434.1	28806.7	22525.6	20170.6	14457.9	22447.7	17890	26764.7	20219.4	20968.7	30757.7	30463.5	25575.7	23852.7	28289.7	28568.9	24408.9	28991.7	20474.9	27151.6	28085.8	26405.7	24125.5	32459.8	24942.5	21481.8	24199	24512.8	31541.9	29604.7	27051.7	27423.8	31870.8	31001.6	28027.4	31296.6
77	KAT6B	chr10:76788843-76788989	NA	18491.8	0	23825.6	21344	15929.8	12903.9	18876.8	16093.6	19283.7	21765.1	15575.6	23115.2	15267.8	18805.3	16396.6	16572.7	15511.6	19043.7	16374.3	16458.8	27697.7	24033.9	18798.6	18685.7	23197.5	20950.4	16844.9	17476.6	13547.8	17791.7	17230.8	19080.8	20704.7	19389.9	18067.8	16195.6	15481.9	17687.5	19062.6	18668.8	14057.8	14600.7	17521.9	17190.8	16071.9	20761.7
194	KIF22	chr16:29809894-29810053	NA	12056.4	13	14307.9	14374.4	9149.6	8235.57	10525.7	8906.56	10762.5	12505.2	9710.66	13888.4	8841.49	10591.6	10498.4	10754.5	10122.7	12478.4	9876.66	10615.6	16016.4	16030.2	12017.3	11846.7	15215.2	13923.6	11368.7	10456.5	9246.69	11292.5	11314.5	13307.2	16263.5	13574.4	9666.59	12382.5	9827.7	12231.5	14268.2	13483.5	9552.76	11280.7	14580.3	11564.2	10604.6	14630.6
356	KIT	chr4:55593347-55593505	NA	23786.3	1	20498.2	22788.5	15168.6	13691.8	16612.6	14658.3	18486.2	23888.9	17374.6	26989.1	16315.5	19227.2	18894.5	17176.6	17574.4	20239.5	16916.6	17823	23953.6	26945.3	18676.4	21939.9	26209.5	22423.1	24840.2	21053.3	17052.7	22734.4	25267.3	21461.2	30714.7	31343.6	18829.5	22899.6	18201.4	23231.6	20331.6	24034.2	18450.7	19094.4	25227.1	22639.2	21938.5	29135.2
357	KIT	chr4:55593580-55593729	NA	11149.8	15	11729.7	12185.7	8004.75	7298	9896.71	8407.75	10136	13035.8	8485.93	12670.4	8825.63	10446.8	9308.96	10406.8	9860	10450.7	9706.81	10452.8	13552.6	13626.5	10517.6	11149.8	13918.3	11872.6	11820.9	10478.9	7725.56	10569.7	11966.7	10662.8	12721.8	13104.6	8998.79	10023	8793.67	10905.9	10479.7	10245.6	7724.95	8558.91	10470	9554.76	10078.8	12884.9
359	KIT	chr4:55593997-55594124	NA	17132.6	0	24168.9	22915.6	17976.7	11551.7	22625.9	21536.4	19077.4	19861.4	17116.3	18697.5	19305.9	19845	14088.8	18996.7	14259.7	22226.7	17096.8	15996.2	22726.8	24477.5	20511.6	15415.7	23523.9	22189.8	14368.8	16145	15708.6	14581.8	14497.8	19491.9	15360.7	15395	15422.8	13781.9	14404.6	14628.7	20109.7	19564.6	16612	14655.9	17431	18111.6	14490.9	17621.5
360	KIT	chr4:55594155-55594298	NA	20745	0	21580.4	20533.6	15711.5	13857.7	18429.3	16704.8	17925.9	21744.8	15943.5	22356.2	16230.8	17806.5	17136.7	18001.6	16650.3	19749.4	16883.7	17808.2	23626.4	25230.7	19058.8	19467.5	23936.4	21594.7	20668.9	20131.8	16608.8	19787.5	21708.8	21812.6	26019.7	25939.8	18922.7	17431.8	17113.6	20129.5	21674.6	21636.3	18112.6	19303.7	21792.6	20815.6	18230.7	24841.4
361	KIT	chr4:55595500-55595647	NA	9299.84	48	10909.5	11542.4	7265.26	6453.96	8878.45	6939.54	8583.47	10666.3	7471.82	11652.4	7201.54	7919.58	8587.7	8585.49	9933.36	10386.8	9596.18	10989.3	13637.6	11511.3	9092.82	10640.2	14775.8	13576.6	10330.8	8534.84	5864.91	8736.95	10762.8	8252	10518.7	10858.6	7579.51	9408.53	7381.8	10209.5	7859.74	7485.82	5639.86	6350.93	8280.3	7764.53	8729.88	9664.91
362	KIT	chr4:55599229-55599361	NA	18188.6	0	18698.3	19487.8	12277.6	12484.9	17977	14521.6	16822.9	23083.4	15599.7	21065.5	15302.8	16900	16970.7	17524.5	14168.8	19756.7	16533.8	16208.5	21785	21481.7	17959.8	17549.6	22935.7	19673.6	17258.9	17949.7	14974.7	17159	18040.7	18043.8	22124.7	20564.8	17977	14003.8	13733.8	16212.9	17715.8	18987.7	14061	16150.5	15968.8	16825.6	15361.9	20610.8
168	KRAS	chr12:25368322-25368477	NA	13312.7	14	12591.3	14603	8001.67	7182.85	9541.65	7202.97	10827.7	14852.3	8776.81	14557	9307.86	10829.5	9791.79	10521.3	10807.7	11073.7	10880.4	11586.6	14873.4	15536.7	10055.6	11173.7	15015.1	14076.3	13932.7	11740.8	7932.9	11272.9	15293.7	11031.9	14357.1	17044.6	9725.34	10621.8	9370.94	12578.4	11188.8	12067.8	9475.77	9466.44	11497.9	10734.8	11550.7	15309.2
169	KRAS	chr12:25368427-25368554	NA	12301.6	4	14500.4	16075	9268.91	8347	15035.8	11621	12893.9	19474.5	11854.9	14830	12321.8	13603	11846	13195.8	11195	15473.7	13083	12639.7	16103	16205.9	12442	13609.9	17542.9	15568.8	11512	13007.9	10130.8	10587	12895.9	12072.8	12609.8	12014	11719	9091.95	9391	11334.9	10777	10803	9169.92	10338	10478.9	11027.8	11229	12094.8
170	KRAS	chr12:25378546-25378664	NA	10172.2	19	13249.9	14391	8888.94	9029.97	13989	11170	12464.9	16005.9	10804	14173.9	11122	12618.9	10787.8	12311.9	10691.9	14176.9	12387.8	12337.9	14993.4	15435.8	12380.6	13329.8	17004.9	15070.5	9972	10232.9	9019	9231.86	9983.97	10649.9	11843.9	9421.97	10371	8625	7920	10373.9	10087	8946.97	8041.96	9646	9519	10079	9350.99	11454.9
171	KRAS	chr12:25378629-25378758	NA	10369	14	11195.9	13619.8	7272.91	6513.95	11743.6	8703.99	10585.9	15185.9	9355.86	12028.9	10240.6	9571.82	9658	11153	9905.99	12205.6	11134.3	10834.8	12426.9	13257.8	10893.8	10752.9	15652.9	13298	10330	11367	8479.89	9447.95	11569	10364.7	11667.8	11514	10306.9	8098.7	8058	9877.8	9758.89	9456.88	7810.95	8490.73	8940.95	10187	9790.85	11480
172	KRAS	chr12:25380155-25380297	NA	8124.24	64	11195.2	12981.8	7875.6	6917.76	10298.3	7724.68	9529.64	12423.5	8082.99	12358.3	8475.71	10348.5	9255.69	9965.53	10084.5	11750.5	10283.6	10116.7	14300.5	13340.3	10486.4	11807.5	14688.7	13117.7	8574.51	8132.92	5871.94	7366.49	8785.64	7422.79	8707.73	7175.62	7038.54	7807.26	6298.78	8474.42	7457.76	5799.61	5588.98	6084.93	7463.51	7399.87	7922.75	7578.84
173	KRAS	chr12:25380234-25380350	NA	17485.4	0	21132.9	20561	13722	13910.9	23237	19872	19384	19778	16202	18970.9	18595	16531.9	16006	17197	15106	18696	15152	15872	18653.8	20254	18022	17950.9	23928	21344	13945	16688	16668	14907	14936	18596	20326	17241	18668	11646	14408	14317	18216	18550.9	16015	18922	16670	19017.9	15258	17424
174	KRAS	chr12:25398189-25398313	NA	16748.7	0	19396.9	20651	13314.9	12246	20267	16744.7	17493	20232	14820.9	17742.7	15630.9	15660.9	16019	17280.9	14140	18017.9	15551.8	14379.9	19876	20834.9	16980.9	16576.9	20927.9	19522	15101.7	16462.8	15914.9	14393	15414	18294	21486.9	18151.8	17011	13140.8	14305.8	14241	19146.9	19686	16138	18929	17305.8	18010	16023.9	18669.8
175	KRAS	chr12:25398214-25398362	NA	6887.15	85	11160.4	13403.9	7168.98	6243.57	8431.34	6012.76	8872.99	12320.3	6635.74	12274.3	7602.74	9889.23	8363.33	8856.2	9636.76	10424	9788.78	9423.3	13529.6	11802.9	9691.86	10350.5	13783.4	13000.2	7437.53	7336.77	4606.98	6480.48	7837.81	6011.34	7879.42	6580.5	5826.6	7560.95	5648.23	7777.6	6259.41	4289.39	4067.58	5050.4	6151.15	5864.51	6588.45	6630.59
134	LRP5	chr11:68115509-68115627	NA	20409	0	32238.2	24343.9	24129.8	25645	33391.5	34111.9	19983	16715.8	18518.9	20342	21607.9	20006.4	21081	20775.8	17914.8	24031.5	17004	16149.9	24183.9	25510.8	24110	23889.7	27499	25698.9	14442	17043	21128	17637	13149	24565	22601.9	16754	20436	16027.8	19269	14592.9	28146	28144.9	24342.9	31746	29429.9	25964.7	16113	19010.8
135	LRP5	chr11:68115586-68115712	NA	23462.5	0	31644.9	28274.9	24198	24531	34020	32831	23934.8	22278	19636	23438	24349	22082	23224.9	23322	20205	25387.5	18377	18783	26354.8	28018	24747.9	25989.9	30851	28975.8	17464.9	20724	24187	20069.8	16752	28666.5	26387	21132.5	25266	18002	21418	18107	28954.9	28366	26495	33427	28885	26789	19172	22857
136	LRP5	chr11:68125096-68125240	NA	20201.7	0	30685.4	24083.5	21979.9	19096.8	24596.5	23928.1	20352.3	20598.5	17510.5	24781.3	18341.7	21014.2	19934.4	20222.6	17992.8	23391.5	18651	18725.7	28964.4	26998.9	21304.7	22536	28923.9	25253.1	19234.3	19498.8	19196.8	20655.9	18554.7	23357.9	26650.5	21867.3	17848.7	19811.4	18168.4	19610.9	26800.7	28134.9	20667.2	23680.9	28185.2	23837.6	18813.3	25135.4
137	LRP5	chr11:68125179-68125341	NA	22262.9	0	25363.5	20316.5	18642.2	16058.4	18238.3	19316.7	16718.6	15794.4	14738.4	20795.1	15902.8	17749.2	15095.6	15523.7	15833.5	18915.5	15003.7	15613.9	23247.3	22754.1	16783.4	16666.2	20865.3	18175.5	19541.4	17747.6	18291.3	23035.5	19771.6	22675.4	27474.4	25751.2	18454.8	20217.9	18799.6	20748.4	24554.6	24090.5	17928.4	22087.5	25182	22266	18513.4	24431.7
138	LRP5	chr11:68131196-68131345	NA	17103.7	0	26250.5	20606.5	20477.8	19800.5	23397.9	23047.5	16320.5	15261.6	15320.5	19211.6	15836.8	17076.4	16772.9	16071.8	16031.7	18739.7	14807.9	14659.8	23667.7	24209.7	19995.8	19573.1	23929.3	20714.5	14494.8	15798.6	15679.7	17970.7	14479.8	20543.9	23445	19593.6	18142.6	18576.9	16478	16279.7	25798.7	25022.8	20035.8	24576.5	28388.9	21535.6	15892.9	19661
139	LRP5	chr11:68153781-68153928	NA	15398.8	20	25365.6	19630.3	18832.8	19022.8	20323.5	20279.4	14200.2	13904.1	14256.4	17905.2	15111.7	15810.7	16736.2	15598.6	14999.2	17530.9	14489.6	15224.9	22947.9	23354.1	16238.5	18695.1	21642.9	18786.6	14469.1	14921.1	15139.5	15817.8	13495.1	18178.9	16373.9	15635.7	12470.6	16831	15377.8	15162.7	23460.5	22510	17061.9	21263.2	23884.5	18719.6	13390.5	19461.1
140	LRP5	chr11:68153845-68153996	NA	25337.8	0	34467.3	27148.5	30073	25604.9	26557.8	29780.4	21900.3	18374.8	18499.7	24342.3	19445.8	22124.8	23043.3	21664.6	20207	23629.5	18883.7	18270.4	31758	31295.3	22861.7	24444.8	26794	22936.3	18225.7	20288.8	19563.6	22243.9	17990.8	26316.7	30224	25307.4	23354	23015.6	22744.8	20512.5	29244.9	29796.7	24053.9	27725.5	31767.7	25070.7	19738	25962
141	LRP5	chr11:68153947-68154100	NA	17144.9	10	29919.5	20338.2	22881.3	22521.1	23220.1	23478.1	14538.4	12358.4	12997.8	17720	14505.4	15597.1	18117.9	15821.7	16157.6	18421.4	14638.1	13782.9	26153.1	24440.6	18890.7	21872	25037	19325.1	15620.3	13081.9	14791.9	17144	13838.9	19311.3	21175.4	19092.4	13884.5	19290.6	16333.3	15534.4	26523.5	25041.8	18689.9	24329.1	29908.3	21247.9	14137.8	18860.8
142	LRP5	chr11:68154039-68154194	NA	12393.6	23	17712.6	14107.4	14321.4	13373.6	16589.9	15277.5	11412.2	8422.74	9985.62	12448.1	10709.4	10766.4	12848.2	10396.3	9754.03	13032.7	9312.17	8776.08	16326.5	16567.4	13982.2	13606.6	16619	13095.2	10895.8	10197.9	12431.7	12520.8	10194.3	14660.9	16680.7	11315.7	11218.8	13684.5	12313.8	11491.8	20278.6	20076.4	17444.8	19379.7	23319.9	15473.6	12577	13057.9
144	LRP5	chr11:68157386-68157533	NA	26108.8	0	32007.5	27612.1	26766.8	20856.1	25634.3	25976.6	24822.3	22253.6	20053.4	26100.3	21060.6	23337.9	23352.2	23393.2	19556.1	24791.1	21342.6	22444.6	32856.5	34066.9	25342.9	24672.2	28052.3	25887.5	25145.4	25194.2	22795.5	26980.3	24614.7	28995.5	29527.3	28716.2	19521.5	23371.2	22927.2	25340.5	31063.4	32877.9	26638.5	27079.6	29595.8	26230.9	24639.5	31632.8
145	LRP5	chr11:68170947-68171106	NA	28711.4	0	36140.3	29164.3	27007.2	22687.4	26484.3	26197.2	23529.7	22455.6	20028.6	30417.3	20274.1	22491.2	21933	21811.3	21870.8	23899.2	20856	21685.2	36890.2	33179.7	25203.3	24899.8	33058.7	27267.5	26602.9	23470.2	22052.1	30341.6	25478.2	29757.5	35535.7	35064	22774.4	31171.3	25591.1	27794	33916.9	32958.1	26211	29843.1	42756	31769	25851.7	33588.8
189	MAP2K1	chr15:66727352-66727490	NA	28927.7	0	26851.6	25614.3	21473.3	18108.9	23301.6	23200.2	23524.1	24709.2	21640.3	26884.2	21263.1	24397.9	21950.6	22695.3	21126.7	26058.5	16883.3	21319.7	29472.7	28718.6	23800.3	23499.5	25679.3	25147.1	23636.9	27514.2	26578.1	26159.8	26621.6	32270.6	33650.8	31130.5	27670.8	21716.2	20758.8	24835.6	28600.9	28597.5	24753.8	30006	29747.3	28606.8	23899.6	31208.6
190	MAP2K1	chr15:66727419-66727569	NA	11153.9	21	14726.8	13531.2	11405.9	9695.89	12653.7	12120.3	11920.9	10772	10019.2	13464.4	10413.9	12102.2	11429.9	10659.9	10924.5	14127.5	9594.62	11648.8	14631.7	15922.9	11837.7	12390.8	15918.8	13462.6	11315	9954.88	9588.99	11446.8	10321.7	12292.8	11563.7	11327.7	8862.7	10521.8	7929.8	10881.5	12820.5	12434.5	9356.38	11018.4	13723.9	11598.7	10538.8	12837.9
191	MAP2K1	chr15:66729048-66729207	NA	12837.3	16	14234.4	13415.6	10678.5	9557.85	11259.5	10858.2	11415.9	13702.4	9928.54	15094.3	9178.39	10974.9	10967.7	11009.4	11184.8	12235.7	10441.3	12357.8	15924.7	15913.3	11772.9	12943.8	15763.3	13131.8	13467.6	12044.5	9165.61	13145.6	12822.8	12646.7	13492.9	14704.4	8351.84	12714.8	9802.91	12327.7	13081.7	12628.9	8747.85	10875.6	15262.3	12174.4	11185.7	16687.8
192	MAP2K1	chr15:66774072-66774227	NA	23336.3	1	29666.9	26766.5	21586.7	18989.2	21822.7	20644.7	22373.4	24537	19431.2	29838.9	19085.1	22832	21125.6	21210.3	20618.8	25098.1	19799.6	21458.7	32219.1	31437.1	23490.3	25148.3	29496	27283.4	24661.7	22133.3	17975.5	23576.4	23380.3	25394.4	27356.3	27283.2	17626.4	23002.3	19598.8	23520.5	25383.2	24950.1	18055.5	21029.4	27176.6	22368.2	20828.3	29246.3
193	MAP2K1	chr15:66777398-66777541	NA	23668.8	0	25998.6	22815.9	18524.6	16008.8	21115.6	20894.6	20993.6	20709	17166.4	22722.7	17941.4	20657.3	17447.7	19080.6	16318.8	20876.4	16897.2	17803.9	26420.3	26896.2	22347.6	21948.1	26651.8	22574.6	20267.5	20650.8	19921.7	21855.8	19646.7	24855.5	31431.5	25570.8	24919.8	18809.8	19519.9	20350.8	27891.6	26385.4	22810.5	25523.6	27583.4	25566.4	21045.6	25592.5
236	MAP2K2	chr19:4099186-4099313	NA	5693.44	114	8216.98	6704.86	6583.85	6994.99	10172	8671.98	4028.52	3175	3685.84	4166	4004	3877.88	4545.75	3786	3359	4731.83	3348	2473.61	6241.76	6352.98	7363	6403.99	8249.84	7292.09	2819	2944	4323.91	3931.83	2660	4960	6161	3960	5393	4087.85	4523.88	3051	8754	7688.74	6939.82	10833.9	11703.9	7747.84	3935.83	3697
237	MAP2K2	chr19:4099294-4099427	NA	8046.39	35	12765.4	9770.84	8171.5	8983.85	11209.9	12257.7	8014.19	4448.84	8206.72	8341.99	4733.6	7009.8	8772	8253.63	6007.88	10796	7109.85	6922.89	10027.9	9632.35	8580.56	10109.9	10464.7	10875.9	6558	4155	8790	6544.6	3110	8233	9064	6885	6259	7272	7123.6	6790	10484	8676.97	8063.86	10782	9257.87	10588	7176.66	3994.93
238	MAP2K2	chr19:4100973-4101124	NA	24559.2	0	25792.9	22559	18825.5	16766.5	19406.9	20102.4	20246.9	18199.5	16687.2	23640	16804.5	17967.3	17992.3	17576.4	15213.8	18981.8	15729.8	16645.8	27688.6	26110.3	19590.2	21647.7	25288.6	21586.2	19983	18904.2	18084.8	23152.9	19529.5	23718	31855.3	26500.8	24052.5	20977.1	19955.2	20937.5	27795.3	25673.5	22270.1	27008.1	27948.7	25628.1	20918.5	24561.3
239	MAP2K2	chr19:4110455-4110609	NA	17091.3	0	23123.8	19034.6	18447.1	16189.7	17660.5	18016.6	17019.5	14907.5	13765.6	18430.5	14785.6	15888.6	16205.9	15242.6	14569.7	16940.7	13588.5	15131.9	23122.5	22349.6	16874.9	18432.2	19669.5	17103.9	15909.5	15072.4	13602.5	16186.7	14697.6	18616.7	22357.7	19328.8	14358.6	15928.5	14560.5	16648.7	20937.5	20268.8	16716.9	18766.8	22932.4	18723.3	14954.9	20888.4
240	MAP2K2	chr19:4110588-4110740	NA	14921.5	7	22617.9	18040.8	17100.3	14379.3	17139.7	16388	15095.2	14781.1	13157.7	19154.6	13377.1	14843.1	15389.6	13978.5	14170	18011	13703.8	14678.1	21167.8	21795.7	16670.1	16916.1	18416.2	17412.4	14802.1	13670.2	12932.4	15397	13247.5	16318.3	17399.8	14538.3	12723.7	15663.4	13246.3	14507.9	19856.7	18549.4	14921.5	16595.8	19991.3	16440.9	14005.4	18316.4
241	MAP2K2	chr19:4117368-4117528	NA	16789.4	0	18858.6	15865.8	13571.6	11385.4	12495.9	13554.8	12601.1	12298.1	10117.3	15563.9	10086.9	12311.5	11449.8	11221.3	10928.2	12646.3	10302.6	11088.7	19284.1	17161.8	12479.9	12956.1	14971.1	12993.5	13154.1	12116.8	10319.6	15264	13486.7	14652.8	18404.5	18266.7	11415.1	14743.5	13569.5	13620.9	19096.7	17993.6	14726.4	15825	19381.9	16524.2	13453.4	19254.7
242	MAP2K2	chr19:4117500-4117648	NA	15889.3	0	16620	17008.8	12383.5	10846	14451.8	13155.8	13867.8	15070.9	11864	16432.8	11933	14087	13256.9	13012.4	12119	13617.7	12327	12271.9	18514.8	17791.6	14733.9	15034	18461.8	16146	14280	13702.9	12126.8	14622	13924	16670.8	18062.6	17600.9	14057	13252.8	13317.8	14075.9	17908.9	16345.9	14268.9	16776.9	17795	16360	13828	18180.8
276	MDH1	chr2:63816173-63816240	NA	6173.96	98	8078.01	9071	5298	5513	7365	8267	5307	4457.01	4986	5231	6398	5359.01	4666	6225	5634	4800	3875	4530	5862	6389	8251	5563.01	7424	8969	4103	3774	5752	4756	4581	4857	6686	5873	6666	3602	4953	3416	4478	4607	5284	8219	5022	9163	5251	3970
277	MDH1	chr2:63822551-63822700	NA	7893.62	71	11053.7	12274.9	8456.65	6356.74	8746.71	6817.61	8733.6	11035.3	7491.47	11386.6	7587.59	10716.4	7275.84	8757.69	10581.6	10198.7	9723.63	9805.75	13748.4	12143.3	10362.6	11624.6	14687.5	13539.1	8783.73	7378.83	5347.81	8119.86	8727.58	7289.83	8664.94	8199.84	6369.98	8512.96	5909.97	8042.8	6875.34	4769.75	5043.81	6299.79	7424.65	7275.77	7012.73	6951.8
278	MDH1	chr2:63831786-63831937	NA	14703.7	13	18459.8	20056.2	13304.5	11499.7	15212.4	12500.8	15741.3	20535.2	12511.5	19959.4	13691.4	15883.5	14664.2	15322.5	15705.7	16831.3	15194.8	16596.8	22986.3	21637.3	14639.6	15954.4	23109.8	18116.3	16011.8	15379.2	9939.7	14268	16690.5	14059.8	16944.3	18045.8	11751.7	13952.6	11813.9	16613.7	12998.3	12456.8	9520.82	11297.9	13551.8	12812.7	13848.8	17546.8
279	MDH1	chr2:63831925-63832074	NA	15373.1	5	15264.8	16290.2	9999.47	9138.04	12999.1	10465.7	13926.8	16621.4	10873	17190.3	11201.5	13221.3	11889	12546.8	12761.2	14221	12822.3	13272.9	18756.9	17626.7	13581.6	14884	18825.1	16184.1	17254.3	15266.9	11791.1	15137.9	18580.7	15234	19079.4	20518.4	13232.3	12905.8	12229.9	15034.3	14624.2	14828.3	11860.6	12853.5	14735.9	15122.7	14082.4	18406.5
280	MDH1	chr2:63834083-63834241	NA	9352.84	52	11147.4	12610.4	7055.36	6231.69	8758.65	6202.56	9088.43	12847.5	7438.68	13010.4	7957.77	9624.38	8137.16	9245.75	9584.8	10468.7	9460.65	10191.5	13844.6	12792.4	9380.18	10574.7	14198.5	12527.1	10466.8	9598.54	5875.68	8788.59	10864.4	8484.39	11054.6	10843.4	7131.75	8837.57	7022.65	10069.9	8676.53	7519.93	6154.71	6589.75	8624.57	7734.84	8557.92	10272.4
471	MECP2	chrX:153297595-153297759	NA	12048.2	19	12170.8	10403.6	8623.32	8179.08	9086.16	9853.21	7727.39	10115.3	8265.56	11741.2	7609.63	9162.86	9655.58	8690.15	8445.95	9653.95	8384.5	8902.41	13256.4	12852.9	8510.62	9493.31	11920	9522.47	11822.3	9660.78	8859.49	13080.3	12082.4	12618.2	12642	14602.1	7986.57	11601.3	9791.49	11552	12199.3	11294.5	8893.62	11075.7	13921.6	12192.4	9048.37	14379.4
473	MED12	chrX:70339211-70339347	NA	11532.1	1	14702.4	13805.6	9999.48	8570.77	13413.5	12171.7	12188.7	12666.6	10270.9	13687.8	10629.4	11152.1	11378.4	10931.5	9724.39	12393.8	10263.9	10023.9	15306.2	15023.1	10051.5	11571.6	14677.5	11884.8	10447.8	10168.8	9429.86	10260.6	10855.8	12152.8	15001.5	12886.6	12742.7	9330.94	10170.9	10889	11593.8	12043.8	9503.8	10521.8	11433.7	10949.8	10414.7	12920.9
474	MED12	chrX:70347136-70347293	NA	7039.89	53	7916.37	7595.65	5016.94	4562.99	6160.82	5128.85	5903.78	7922.94	5250.9	8245.84	5346.89	6298.97	5465.9	6010.89	5454.97	6413.99	5994.76	6130.73	8268.99	9006.89	6201.78	6664.86	7898.73	7130.77	7192.75	5629.99	5250.75	6646.97	7041.82	6741.83	7366.92	8760.87	5090.91	6136	5463.99	6859.88	7239.75	6850.99	4987.95	5416.85	7261.98	6387.89	6287.85	9062.92
475	MED12	chrX:70347690-70347851	NA	13510.9	7	13191.6	11677.6	11155.3	9305.62	10321.4	11218.7	11089.3	11565.8	9214.53	12918.8	9122.17	11092.8	9777.72	10434.6	10226.5	10437.7	9253.44	11008.7	15101.8	14264.7	11698.7	10962.5	12524.2	12661.5	14990.4	12959.6	10137.4	16127.3	14574.3	13435.5	14481.5	18110.3	9209.72	13330.6	12478.5	13762.5	13377.5	13257.3	11382.6	12198.6	16507	14594.6	12714.4	18320.3
476	MED12	chrX:70348433-70348564	NA	11565.9	6	12947	13374.8	9457.89	9389.82	12969.8	12351	10950	12406.8	9682.9	13517.8	10056.7	11020.7	11161.9	11198.8	10347	12991.9	10066	10247.9	14287.8	13459	9599.02	11438	14392.9	11748.8	10500	11224	9863.89	11352.9	10916	11611.8	12682	12272	12381	9138.87	10180	10798.8	12230	11898	10733	12901.5	11805	11749.8	11249	13607
477	MED12	chrX:70348950-70349095	NA	8486.93	21	11142.8	11321	8250.41	7130.95	9571.97	9416.82	9832.86	11053.9	8021	11393.3	7766.97	9535.73	7402.75	8427.66	7494	9152.9	8789.93	8757.95	11453.8	10988	9387.02	8513.84	12095	10318.8	8333.92	7865.84	6501.99	8304.97	8482	8476.95	8501	9107.98	7104.99	7781.76	6955.99	8460	8169.98	7849.97	6876.9	6869.24	8563.97	7952	7325	9974.96
382	MET	chr7:116339495-116339651	NA	23264.3	2	27508.7	23344.2	22100.8	19098.5	20998.1	21633.5	18577	20996.8	17595.5	26940.6	18049.4	19758.8	18397.8	19010.4	18674.4	21193.2	19124.3	20905.5	30290.5	28764.9	21382.4	21661	25979.3	25184.3	23569.7	21955.5	17768.7	24372.6	23840.4	25468.6	24232.5	27599.1	16955.9	24037.1	20679.5	23304	26015.3	26358.6	18796.1	22493.8	30480.2	24724.4	19462.4	29333.6
383	MET	chr7:116339671-116339811	NA	14506.8	11	16731.2	13699.8	11627.4	9056.89	14112.3	12770.8	12188.8	14788.6	10713.9	14310.2	11839.7	13439.6	11806.5	12568.8	10454.8	14733	12461.9	11394.7	18058.8	15871.4	14215.7	13180.7	17113.8	15537.7	13723.8	12689.8	10738.8	12928.9	14521.8	14048.5	15135.9	16043.7	10352.8	11994.9	11389	13220.9	15208.5	14110.7	12132.4	12246.9	14251.2	14310.7	12177.5	15685.8
384	MET	chr7:116340210-116340342	NA	23675.8	0	28001.4	27226.7	20261.9	18182.8	27315.7	23710.6	24798.8	27699.8	20196.7	26791.1	23679.8	23847.3	22036.9	23238.7	20365.7	24807.8	21639.8	22641.4	30236.6	31528.8	23274.6	24502.8	28578.7	25196.8	23275.8	25553.6	22278.8	23525.8	23632.5	26552.5	31497.6	27031.7	25360	20173.9	20471.8	23385.9	25157.8	25062.6	23143.5	25436.8	24673.5	23294.8	21818.9	28586.8
385	MET	chr7:116411900-116412051	NA	5444.88	126	8191.6	8857.42	5870.59	5019.52	6614.9	5105.83	6894.78	9108.58	5229.75	8345.74	5655.36	7325.65	6242.64	6530.7	7449.95	7836.26	7107.79	7623.3	9792.22	8888.55	6444.51	8194.56	10296.5	9519.08	6198.79	5089.98	3487.87	5060.49	5731.89	4631.77	5831.7	4626.74	4510.78	5556.6	4234.8	6022.82	4841.72	2739.91	3191.91	3628.84	4740.56	4343.86	5466.62	5015.87
386	MET	chr7:116418912-116419040	NA	10298.9	14	13412.9	13841.7	10207.8	8720.98	12115.4	11859.8	11143.6	13137	10227.9	11845.7	11121	11648.7	10992	10758.8	10199.8	12223.9	10603.6	11177.8	13668.4	14186	11906.9	10630.8	12923.6	13320.5	10336	10555	9940.84	9450	9900.88	11373.9	11519.8	9900.97	9682.79	8600.83	9077.71	8945	10589.8	10502.9	8851.99	9714.67	9044	9536.98	9679.75	11703.7
387	MET	chr7:116422020-116422153	NA	9880.74	28	12330.9	12491.8	7409.43	7316.63	11450.9	8530.71	10608.1	13775.4	8862.27	13163.9	9657.63	10549.4	9944.55	10367.7	9922.57	11254.6	10261.6	10248.4	13724.9	14440.4	10453.5	10752.3	15234.5	12541.5	9959.51	9693.53	7840.04	9078.53	10354.4	9239.99	11718.4	10743.1	9168.93	8510.28	7735.51	9848.71	9779.27	9074.42	7312.34	8327.98	9680.17	8827.33	9678.7	11044.3
388	MET	chr7:116423364-116423518	NA	18072.8	3	18126.6	17606.5	12301.6	10062.7	13378.7	11597.7	16104.9	19126.7	13046.5	20839.9	12769.7	15925.1	14767.5	15026.3	15515.6	15662.4	15101.2	16139.7	21063	20364.1	14827.7	15392.5	19706.5	18048.5	19525.6	16159.5	12274.3	17459.7	20107.4	16607.4	22211.6	24216.3	14487.6	17172.7	13793.6	18797.5	15976.8	16915.6	12479.8	13002.5	17400.6	16298.2	16135.7	22624.7
176	MIP	chr12:56845131-56845265	NA	15866.7	0	18168.8	18087.5	11226.9	10276.8	17355.3	13715.8	14344.7	19634.8	12915.9	16792.2	14279.7	14009.3	13391.7	15394.7	12365.6	16925.8	14470.9	13600.2	18224.1	19305.6	15643.8	15555.7	20680.4	18201.3	13459.8	15483.7	13798.8	13343.7	14762.9	17208.9	17397.9	16304.8	15184.5	11975.8	12179.9	14114.9	17564.9	17211.7	13571.6	15909.8	16264.3	16038.8	14236.8	17011.5
177	MIP	chr12:56847368-56847530	NA	22447.1	0	32047.4	24504.2	25140.8	22502.1	22361.6	23652.3	22227	20333.5	17634.6	27464.2	18703.6	21259.3	20923.3	20190.3	20824.1	22697.3	19047.8	21146.7	30830	30205.1	21744.6	21571	27191.8	22977.3	21705.7	20793.5	17864.7	24558.5	19841.7	23738.4	27658.4	25549.7	18370.4	21964.3	20029.8	21888.5	24806.6	25303.5	19284.5	19656.6	28284.5	22267.5	18755.5	27798
178	MIP	chr12:56847441-56847588	NA	23327.1	0	27986.9	25587.4	23481.6	20065.6	23319.5	23579.6	20988.8	20495.6	17987.9	25791.7	19897.8	20303.6	20944.8	18628.8	16952.9	22918.1	19084.7	19117.8	28657.2	28757.5	22161.8	22192.9	26857.5	24229.8	19934.8	20686.8	19573	22805.8	20200.9	24519.8	28223.4	22049.9	18141.7	18935.7	18883.9	20890.7	26022.8	26062.9	21308.6	23906.9	25984.8	23598.9	17898.9	25009
180	MIP	chr12:56848078-56848240	NA	24862.4	0	27221.5	22510.9	19472.2	17833.8	20108.7	20204.3	17886.4	15011.4	15236.7	22478.1	15898.3	15956.7	16391.6	16316.2	17210.2	20919.5	16172.4	15897.4	29375	27756.4	20948.4	20723.4	25146.1	21444.6	20275.5	19542.8	18972.9	24902.5	22383.8	24326.8	27228.7	29243.7	20482.6	22659.8	22813.4	21457.8	29083.6	26446.4	21202.7	25950.3	29192.2	24756.3	18862.6	25055.4
1	mTOR	chr1:11217201-11217269	NA	10996.5	26	21450	17970	15248	16059	18115.1	21946	9879	7289	9349	10806	14096	10877	10426	13723	11134	10302	8018	8888	13744	12300	17322	11917	14605	17270	5989	8119	11251	9130	6590	10225	12034	10514	11905	7906	11093	6200	10907	10305	12575	17162	12991	18011	8338	7867
195	NF1	chr17:29533252-29533378	NA	14435.4	1	22270	23047.8	17367	15748	23859.4	19967.9	19001.9	23155.8	16352.9	19809.9	18593.9	20843.9	18613	19869.8	16939	21971.9	19057	18568.9	23064.9	22063.9	16494.9	20924.8	24762.9	21998.9	12724	15660.9	12806	12607.9	12807	15952	16330	11810.9	14964	12422.9	11625	13875.9	14134.9	11147	10512	12632	12922.9	13680	13582	15620
196	NF1	chr17:29533310-29533452	NA	10942.3	18	10610.7	10572.7	7676.88	6389.9	9725.8	8510.88	9570.88	12822.7	7950.9	12191	8989	9276.79	8276.72	9632.66	7002.88	10204.9	9649.78	9726.82	12375.8	11559.9	9891.94	9967.92	12660.8	11407.8	11072	10772.9	7972	10775.9	12201.9	10122.8	11691.9	12882.6	7057.9	8933.87	8016.98	10647.8	10279	10566	8187.9	8445.84	10489.8	9862.71	9353.93	13590.9
198	NF1	chr17:29541503-29541636	NA	9949.49	30	11204.5	12671.7	6634.79	5985.62	9442.6	6533.51	9320.59	13781.6	7965.84	11985.2	8804.57	9914.77	8549.92	10045.9	9746.65	11363.3	10026.6	9821.46	13695.7	13028.5	9578.6	10459.3	14577.7	13290.6	10658	10257.8	6697	8710	11618.9	8952	11409	11532.3	7960.87	8481.84	7054.9	10284.8	9348.64	8991.9	6967.78	7957.97	8696	8327.86	9146.91	10976.7
200	NF1	chr17:29546119-29546194	NA	6758.58	64	14081	11950	9027	10391	14744	13117	6776	5343	6719	7003	8736	7596	7745	9050	8437	7806.78	6350	6561	9104	9972	11803	9388	12790	12696	5049	4764.78	6721	5340	5050	7132	8006	6415	7755	4894	6233	4377	7146	6538	7353	10568	8427	10981	6041	4885
202	NF1	chr17:29552166-29552300	NA	20459.6	0	20525.8	23246.7	15117.9	13358.9	19709.8	16655.8	21652.6	25344	17129.7	22045	18913.7	21003.8	18944	19983.6	17456.9	21489.8	18604.9	19852.8	24381.9	25538.9	18456.5	21325.8	23353.6	22312.9	19153.6	21099.8	15700.8	19176.6	20832.9	20683.8	24030.9	21602	18918.9	15101.9	15715.9	18908.8	16879.9	18264.2	14439.8	16553	16587.9	17386.8	18222.9	22908.8
203	NF1	chr17:29554234-29554315	NA	13589.1	3	22034	20093	14753	11742	24004	23645	13137	13229	13001	13681	16105	12191	10610	14431	10624	12548	10418	10964	14076	16042	17544	10716	18832	19866	9090	12052	13630	11444	9688	11275.7	11437	11589	12599	8829	11350	8236	12773	13156	13181	14720	15314	19846	11218	12115
204	NF1	chr17:29554518-29554645	NA	11362.5	15	16801.8	17465.7	10763.8	10241	16881	13497.9	13824.9	18383.8	12644	15801.7	13866.9	14397.6	13644.7	14593.4	12779.9	16576.8	13565.9	13502.8	17157.9	17821	13575.9	15869	18373.7	16530.9	11364	12166.8	9649.67	10106.7	11464.9	12744.7	12698.9	10627.8	11742.9	9179.87	9838.92	11611	11853.9	10440.9	8826.88	10435.6	10660	10782.6	11002.9	12884.9
205	NF1	chr17:29556083-29556194	NA	11982.5	0	15841.9	14253.9	10700	11115	18370	14613	11745	11977	11440	11268	13606	11272	10781	12629	10500	13731	9867	9913	13276	15236	14759	12310	17180	15536	8436.53	12377	13566	10660	9935	14361	12366.9	10550	11909	8809	10324	9331.53	14094	14808	13176	16426	15365	14851	10305	11456.5
206	NF1	chr17:29556207-29556346	NA	17287.8	7	25815.7	23128.9	17926.7	14123.1	20687.8	17855.2	18730	23471.3	12286.2	22998	16784.6	13862.8	18217	18969.9	7150.89	23864.4	19300.4	18885	26629.7	24088.7	21010.6	20016.8	27051.2	25033.6	15709.6	18203.7	10742.4	16628.5	17900.2	13809.6	18407.8	17901.5	6567.26	18000.4	14542.9	18500.2	20173.6	17633.3	14613.9	14709.5	18915.9	17733.5	16280.1	20576.8
457	NOTCH1	chr9:139390785-139390931	NA	21140.1	0	27695.9	22290.7	19074.9	18528.9	23943.5	20415.5	17654	12826.5	14642.9	18018.8	14741.3	15669.8	18104	15666.5	14545.9	18000.1	13681.8	12472.2	25447.7	24083.2	18796.6	21205.8	25121.5	19042.3	12654.7	12811.7	16807.7	14648.4	13039	21237.3	28485.6	17159.9	20940.9	15569	17391.6	14985.8	27064.7	24450.9	21028.6	28127.9	28508.8	22696.7	15990.4	15701.4
458	NOTCH1	chr9:139397615-139397766	NA	17912	0	20417.4	16985.6	17687.3	15700.4	22870.3	21974.6	15299.7	14985.3	15713.6	18534.7	11905.7	14576.3	16626.2	14010.9	12794.9	19173.4	12377.6	13949.8	18373.5	17755.9	14161.7	15268.7	25242.8	19721.6	13959.8	14809	18595.8	17239.9	11750.8	18059.7	20437.4	15192.9	13091.5	18301.9	13289.9	15451.2	17306.8	17079.7	13655.8	17407.8	28865.8	20983.7	13768.7	18642.8
459	NOTCH1	chr9:139397726-139397880	NA	23520.8	0	33076.5	26109.4	26599.9	22841.5	25692	26155.2	21628.3	20565.2	19509.9	26038.1	19981.8	21391.5	20812.8	21986.2	20215.1	23395.7	18456.9	20141.2	31211.7	31853.5	22982.3	24343	28775.3	25205.1	20451.1	21141.2	19986.1	25158.1	20505.3	26540.9	27660.1	25517.6	19930.4	24905.5	21470.7	22706	30448.2	29038.5	23009.9	27510.9	33495.8	26663.1	20134.2	27668.2
460	NOTCH1	chr9:139399123-139399285	NA	18050.9	0	25860.4	18304.9	20423.7	18827.4	18203	19637.1	12880.9	12658.1	12838.3	17761.3	12366.8	14612.6	15748.7	14361.9	14003.3	17054.6	12777.4	12973.5	25388.1	21976.3	16478	18313.8	21782.5	17627.8	14296.3	13690.3	15023.8	19137	13630.6	18052.6	21695.2	19259.8	13702.5	20899.1	16285.4	15726.3	25449.7	22420.8	17386.8	22457.5	30125.2	21887.1	14072	19177.7
461	NOTCH1	chr9:139399205-139399364	NA	7328.06	90	9267.9	6669.53	7631.74	6802.61	7615.48	7776.84	4903.88	4932.93	4830.61	6543.57	5011.92	5273.58	5916.69	5528.41	5898.7	6463.88	5224.84	4810.86	12563.6	11648.5	9758.66	10390.2	11152.6	9525.49	7875.54	7267.84	6237.62	8609.89	6327.7	8312.88	9279.77	8223.64	6146.8	10700.6	8193.79	7929.85	11272.8	10521.8	8018.82	9659.54	12791.4	9039.54	7086.82	9887.69
462	NOTCH1	chr9:139399307-139399447	NA	12201.5	26	24244.8	18319.5	20459.9	19780.9	22032.6	22908	13122	12212.7	12911.9	15767.9	13668.5	14183.1	17224.8	14191	13512.9	16370.6	12707	11543.7	20689.6	20743	16098.7	18099	21535.4	17708.7	11401	11177	12636.7	12684.9	10036.9	15928.8	14879.9	11977	11158.6	13307.8	11848.9	11065.8	20576	20116.7	14435.8	19429.9	20309.9	16167.4	10866.9	14782
463	NOTCH1	chr9:139399386-139399530	NA	17878.9	5	32249.6	23823.6	25345.1	22896.7	25259.6	27682.6	17135.6	16632.6	15712.7	21652.8	16779.8	18025.6	17915.2	18814.8	16964.6	21312.6	16202.7	16057.8	28061.4	26988.3	21500.5	19527.6	25309	22335.6	16123.8	16176	17313.8	18869.8	14560	22065.7	17972.9	18029.7	14190.8	20007.6	18258.4	16675.9	28166.9	28082.7	20111.9	22719.9	29235.1	22611.8	15998.7	21292.7
10	NOTCH2	chr1:120458034-120458168	NA	28525.6	0	35710.5	31130.7	25831	24200	32798.6	32487.6	26620.9	26983.7	22117.6	27561.7	26278.7	24091.1	23493.7	24913	21033.8	27873.3	21703.7	21711.6	32143	33336.5	26206.9	27073.6	32278.3	28372.4	23247.7	26593.9	24386.7	27432.8	26076.9	32017.7	30296.7	27037.8	23032.9	22364.7	24057.7	22726.7	35362.8	34069.9	28794.8	34265.5	33554.7	31648.6	24651.7	32488.3
11	NOTCH2	chr1:120458148-120458307	NA	25845.8	0	30506.6	26674.1	25648.8	19030.5	22118.5	22821	20134	20144.2	17870.6	26622.4	17936.4	22859.5	16769.2	20431.8	19970.7	22798.4	19227.5	19516.1	32369.3	30245.2	23107.1	21660.9	29156	24134.5	24408.9	21064.4	19234.9	27397.5	24737.6	28705.4	25269.7	29916.7	18105.3	25540.5	22424.4	23168.4	29063.2	28162.4	21656.4	23734	33729.2	27093.9	22067.5	30555.1
12	NOTCH2	chr1:120458253-120458410	NA	12753.7	7	15912.6	11538.2	11645.5	10878.4	12555.6	11580.3	10222.4	9676.68	9193.76	12564.5	8849.61	11007.4	9139.67	10017.5	9942.44	10887.5	10093.7	9675.51	16117	12363.7	11159.6	12680.3	15481.6	12390	11724.7	9622.84	8868.85	12025.6	11020.5	11950.7	12919.4	14448.3	9222.96	12741.6	10379.6	10623.7	13273.4	11986.7	10274.4	11864.8	16052.6	13789.8	10752	13266.6
13	NOTCH2	chr1:120458337-120458493	NA	24175	4	25568.7	22388.6	18886.7	17825.5	21440.1	19181.1	16841.5	18036.4	16314.4	21834.4	16092.8	18531.5	19395.9	18103.7	18027	20199.1	17833.6	17749.6	27112.5	27173.3	20332.6	21198.7	26743	21991.1	22084.8	18768.4	18905.6	22612.4	22301.2	25443.7	26242.1	27070.5	16191.6	23144	20390.8	22679.7	28383.3	26593.1	20107.7	26622	32278.7	26558.1	19744.4	28008.6
14	NOTCH2	chr1:120458438-120458580	NA	12385	9	13533.8	12907.9	9766.88	8906.82	13360.7	11821.6	11381.6	12243.8	9710.64	13583.5	11006.5	11285.7	11214.9	11674.8	10244.8	13326.7	10604.9	11087.5	14571.8	15274.9	11671.7	11540	14407.5	13228.8	11264.9	11811	10616.8	11495.9	11783.5	13047.8	13266.9	13309.8	10001	10788.8	9988	11291.8	13145.6	14333.5	10728.9	12168.9	12908.9	12586.7	10902.9	14470.8
15	NOTCH2	chr1:120458512-120458667	NA	25604.2	6	29724.8	25149.7	21588.3	20412.6	22553.4	24976.7	19450.6	21812.4	18769.7	26392.5	21136.7	20878.4	20753.7	20978.7	19750.1	23282.2	19337.5	21733.4	30343.2	30348.3	21817.1	22746.4	26480.1	24968.2	24818.3	22044.5	20772.4	25963.7	23622.6	27742.5	26796.9	28109.3	17085.8	24669.9	22399.4	25789.3	31929.5	29825.2	22219.8	27468.6	31151.4	26731	21852.6	31926.8
16	NOTCH2	chr1:120458665-120458807	NA	31238.1	0	37116.1	31778.4	28224.5	25919.7	32374.7	32312.3	25473.6	23738.8	23227.7	30366.7	23399	25176.9	27135.8	24939.4	22912.9	29163	22297.4	22867.8	34157.2	32373.4	25408.6	27927.5	33902.6	29192.9	24614.6	23863.8	26313.5	29572.7	23853	33216.9	34544.7	30740.6	24348.9	26140.7	26047.8	24351.7	35815.8	35756.8	26573.6	34140.8	37531.7	32276.7	25193.9	31405.8
17	NOTCH2	chr1:120458764-120458925	NA	18646	6	19052.1	17442.9	15648.2	12451.5	14672.1	13815.3	13492.1	15898.3	12399.7	19103.5	12816.3	14526.2	13206.3	14167.3	13079.4	15134	13075.6	14947.7	20562.3	20725.2	15629.2	14806.4	17993.3	15659.1	18450.5	17377.5	12563.5	19595.2	19279.3	16717.4	18663.2	22134.1	11834.5	17069.6	14183.7	17140.2	17680.3	18489.2	14129.4	15640.8	19078.1	18195.3	16242.3	23095.7
18	NOTCH2	chr1:120458861-120459004	NA	23764.6	0	25872.9	24869.4	18821.8	17038.8	24053.9	22670.8	22904.8	23649.8	18528.8	26508.5	20686.8	22157.6	20998	21042.6	18099.7	22707.7	18549.7	19342.5	28265.4	26901.9	19347.9	20560	27430.7	23948.8	21904.8	22805.9	19627.7	23424.8	23396.1	25069.8	29718.8	26858.5	24192.7	19097	20140.8	21920.7	25453.4	24968.9	20246.8	24331	25077	24722	22307.9	27100.7
19	NOTCH2	chr1:120510025-120510148	NA	26352.9	0	31961.6	28800.9	22533	20393.5	29140.9	28731.8	25842.8	24663.8	21431.5	24674	25920.9	22653.9	22678	23831.9	20532.7	26328	21519.9	20184.9	28741.6	29936.8	26187.7	23800.7	28357.6	28078.8	21518.8	26109	27136.9	23959	23358.8	29950.9	32814.8	26679.9	26819	19128.9	23120	22150	31891.9	28383	27252.8	33136.8	28298.7	31144.9	23974.9	27942
20	NOTCH2	chr1:120510141-120510276	NA	25124.4	0	34775.1	30328.2	24820.1	24237.5	31511.9	30967.4	25460.1	28197.4	22319.1	29340.9	26197.1	25141.2	25721.3	25296.3	23411.1	29240	24054	24983	34336.4	33593.9	24396	28596.3	34294.8	29826.9	23350.3	26927.8	23321	25134.6	24145.4	28981.4	28307.5	27005.5	24466.8	21042.5	21714.5	24403.2	30358.9	30001	23815.5	28028.1	29522.2	27838.2	22678.3	29186.4
21	NOTCH2	chr1:120510675-120510806	NA	18188.9	0	20231	20485	14369.7	14094.7	20754.8	17776.8	17328	18349.7	15243.9	18281.9	15786	16492.6	16021.9	16175.6	14624.9	18887.9	14943.8	15498.8	22467.7	22310.7	18219.9	18452.5	24171.2	20191	16304.8	16402.8	16398.8	17670.9	16510.9	20501.8	20933	19398.8	17436	14693.4	15643	16700	21486.8	20775.9	17394.9	21066.9	20202.9	20801.9	16085	20079
22	NOTCH2	chr1:120510787-120510901	NA	13772	0	18548.6	16918.9	11709.8	11569	19712.9	18044	14198	14632.9	12217	13293.8	15849.8	12451.9	11749	14639.9	10647	14672	12180	12050	15517.7	16665.9	13466	13215.9	19535.8	17048.9	10912.7	13188	13222.9	11737	11514.9	14125	14348	13191	13940	9051	12183.8	10734	14959	15227	13271	14842	14022	15157	11924	14222
487	NOTCH3	chr19:15302755-15302916	NA	13037.6	2	21614	15691.2	15893.9	14365.2	15883.3	15969	11125.1	9084.45	10045.1	13681.7	9863.51	11389.4	11602.5	11142.7	11413.7	13833.5	10245.4	9953.23	19668.7	19886.4	14903.3	15429.2	18423.5	15592.4	12005.8	9741.21	10726.7	13131.7	11036.7	13808.6	16182.5	15720.6	10397.9	15094.2	12073.3	11750.6	19186.4	17549.5	14156.8	17358.6	21795.3	15612.4	11633.6	14446.6
488	NOTCH3	chr19:15302841-15302999	NA	16431.4	2	31116.6	22297.5	22564.2	23458.2	25358.8	23793.2	14708.5	10477.8	12705.7	17517.4	12722.2	15061.8	18467.9	14755.7	14629.4	18010.8	12756.7	11927.5	26913.7	25362	19448.4	20907.6	25893.6	19984.4	12963.7	10960.5	13107.7	15093.6	11754.8	18979.6	24063.7	17413.7	14576.6	17940.7	15449.6	14022.9	26596.7	28298.6	19897.4	25756.8	31478.2	20881.5	13887.8	16885.5
489	NOTCH3	chr19:15303178-15303273	NA	8975.95	28	16268	13151.9	9198.95	10304	16852	15178	7813.96	6004	6918	7999.95	8666.96	7126	7723	8313.82	6732	8349	5738	5422	9984	10475	13992.9	9849	13780.9	13287.9	5269	6215	8425	6042	4802	8138	9869	7349	10125	5873	8220	5090	11844	10478	11816	17817	14131	15385	7721	7179.85
2	NRAS	chr1:115251153-115251261	NA	20908.6	0	22755.9	22697	16077	15285	25394	22945.9	18883.8	22471	17840	20334	20448	19220.9	18410.8	20550	16776.8	20908.9	16687	17908	20806	22281	20863	19167	23374	23737	16530	20889	20126	18544	18312	21964	25439	20315	23900	13238	16537	16182.9	20049	19842	18860	23054.9	19527	22503	19033.9	20142
3	NRAS	chr1:115251240-115251336	NA	5112.4	134	6670	7878	3629.07	3905.14	8209	5763.97	6018.07	8113.7	5479	5542	6740	5868.93	4949	6399.86	5615	6646.8	5527.97	5711.77	5393	6664.97	6276	5668	7829	7513	4594	5785	5113.8	4450.97	5267.97	4982	4958.7	4590	5702.67	3303	4205	4300	4290	4298.97	3928.97	5111	4147	5414	4875.97	5145
4	NRAS	chr1:115252175-115252292	NA	23082.6	0	27695.9	26098	19170	17894	28321.9	24959.5	22422	24706	19882.9	24284.9	22991	22014.9	21241.9	22040.4	19735.9	24703.8	19484	20126	23711	27757.9	23451	22042.9	29621.9	25824.8	19722.9	22626.9	22308	20828	21558	26315.8	27158.9	25106	24697	17789	20493	20839	25444	25049.9	22600.9	27522	25940	26427	19936.9	26100
6	NRAS	chr1:115256368-115256505	NA	15567.9	9	15309.9	15975.8	11232.8	10414.1	14144.9	13433.4	13448.2	17232.9	12404.2	15475.4	13261.5	13971.1	13275.9	14053.9	12089.2	14755.8	13137.9	13805.9	16954.8	17735.8	13152.2	13683.9	15741	16112.8	16108	15992.9	12808.9	14308	17148.8	16142.1	16421	18052	12684	12441	12668.9	14934.9	14959.8	15920.8	12739.9	14343.7	13975.8	14517.7	13874.9	18967.8
7	NRAS	chr1:115256484-115256561	NA	12208.9	5	20794	19923	13867	13901	23476	21978	12508	12168.7	11804	12806	15555	12249	11609	15921	13062	13317	10237	11582	13485	14355	17150	13470	19022	20293	8523	10872	13200	10494	8701	11433	13403	10820	14300	8553	11479	8180	11338	10477	11206	17359	13343	18155	10527	10752
8	NRAS	chr1:115256519-115256614	NA	13940.9	0	15266	14119	12078	11329	17579	17755	9836	9808	10753	9842	12183.5	12111	10960	11561	10726	10691	9103	9952	11684.6	12176	14070	10714	14920	15772	13242	11397.7	14864	15691	13887	15361.5	16293	17798	12697	11397	14039	10301	13580.5	13337	13737	22212.5	19231	20406	13634	13932.5
9	NRAS	chr1:115258639-115258793	NA	22261.2	0	24732.1	22867.3	18294.3	15955.4	19265.6	19048.6	21255.7	23500.8	17300.7	25656.3	16451.5	19906.6	18707.6	19688.6	18577.8	21209.7	18463.8	19503.4	27194.2	26311.3	18993.6	20303.4	25615.4	22970.4	22162.5	21433.7	18113.7	23208.8	23743.3	23660.5	28902.3	27974.1	18804.6	21984.7	18434.8	23007.6	23179.8	24514.5	17544.7	19817.6	25225.7	22198.7	20850.7	29438.6
483	PDGFRA	chr4:55151990-55152112	NA	19883.8	0	27603.9	25209.7	20633	20154.9	27789.8	26384.8	20977.9	22756.8	19554.7	23074.9	20605.9	22154.8	19494	21761.8	18880.7	23700.5	18015.9	19788	22491.9	25715.9	21013.8	21942.8	25076.6	22909.9	15944.8	20311.9	19743	17846.9	15475.9	24303.9	23057	18950.6	21102	15433.9	17413	17373.9	23134	22367.9	19691.7	23475	21338.9	21112.8	16513.9	20605
304	PIK3CA	chr3:178916790-178916910	NA	10394.7	1	11768.9	13428	6679.98	6365.93	12586.9	9128.98	11574	14306	9099.98	12472.8	9982	11136	9516.86	10906	9179	11895	10180.9	10460	12258.9	12664.9	10644	11106.9	14837.9	13759	9491	10964.9	9085	8926	10704	10559	11294	11337	10713	7428	7949.94	9216	9266	9341.95	8313.98	9414.79	9000	10087.9	9201.99	10117
306	PIK3CA	chr3:178922216-178922330	NA	7985.8	25	10105	11362.9	6379.97	5755.86	10730.6	7374	9340	12475.8	7966.97	9540.85	8890.89	8799.01	8113.93	9546.86	8411.99	10388	8981.8	8905.97	10398.9	11055.9	9102.97	9191.97	12567	11237.8	7834.89	8175	6560.96	6508	7826.97	7663	7902	7409.84	7328.92	5623	5887	7170	7038	6319	5856.96	6673	6440	6830	7087.99	7499.9
308	PIK3CA	chr3:178927942-178928085	NA	7367.18	69	11120.9	13320.4	7274.89	6342.92	9477.97	6726.76	9706.54	13490.4	7423.49	11947.4	8133.83	10072.6	8909.72	9904.78	10398.9	10950.6	10319.5	11095.3	13946.4	12061.8	9302.72	11051.9	14746.4	13691.1	8141	8193.91	5100.81	7013.76	8754.9	6917.95	7932.9	7568.81	5928.99	7424.49	5921.88	7671.89	6231.6	4835.89	4680.98	5235.84	5946.94	5746.74	7229.92	6831.85
309	PIK3CA	chr3:178928070-178928163	NA	5426.65	113	6452	7920	3195	3116	7299.02	4870	5929.01	7870	5195.96	5470	6386.01	5180.12	4567	6317	4973	5986.06	5428.97	5161	5481	6249	5986.82	4934	7728	6947	4472	5088	4944	4067	5141	4749	5852	6038	6416	3032	4632	4238	4610	4803	4601	6127	4386	6482	5336	5491
313	PIK3CA	chr3:178938844-178938990	NA	23387	0	23622.5	21954.6	16604.7	15046.9	19298.7	16646.6	20589.9	22295.4	15818	22964.7	17776.5	18599.8	17643.8	18604.8	16635.8	20814.5	17736.7	18915.8	26407.5	26454.2	19832.8	21052.9	24289.6	22714.7	23460.8	22635.8	19331	22131.5	23934.8	25324.5	27190.7	27367.6	17940	19597	19191.7	23535.8	23559.7	24218.7	17945.8	23359.6	25073.6	22766.7	21377.6	27283.7
314	PIK3CA	chr3:178941815-178941970	NA	13996.5	12	12737.3	14669.4	8976.92	7050.81	10361	7927.13	12250.8	15367.6	9468.22	16029.6	9354.43	11305.2	9535.9	10935.1	10554.3	12294.1	10891.6	11958.6	16301.5	15871.1	12109.5	12118.7	16378.1	14973.7	15602.9	12496.2	8614.65	13648.4	16127.3	11896.8	14536.8	17459.2	10028.6	12586.6	10208	13431.3	12140.1	12151.4	9955.13	10143.1	13005.5	11527.7	12789.4	15715.4
315	PIK3CA	chr3:178947746-178947898	NA	28712.3	0	30146.6	29662.7	21784.3	19547.6	23011.5	22561.4	24549.4	28708.8	19766.8	32795.7	20626.4	23939.6	22957.6	23357.8	22525.5	25707.5	23416.8	23493.6	34762.1	31723.8	22948.8	26871.1	32845.4	26128.1	26926.6	26435.8	20562.3	28501.8	29679.8	26857.7	34481.5	39040.2	24847.6	25576.2	23974.5	28718.6	25124.7	27483.8	19420.4	22162.6	29174.8	25770.6	26125.4	35743.6
316	PIK3CA	chr3:178947843-178947921	NA	9608.61	10	15206.2	15148	9654	9867	16662	14916	10173	11180	9903	11181	12540	11806	9436	12125	11910	11570	9077	10064	11048	11527.1	13075	10376	15483.1	15817	7654	8100	9247	7827	7279	8299	9190	8388	10382	6306	8157	6609	7984.05	7191	8107	11200	9388.05	11844.1	8346	8157
317	PIK3CA	chr3:178951877-178952032	NA	9734.66	54	11579.6	12034.8	7909.5	6849.65	9340.71	7383.69	9871.55	12819.5	8358.7	13395.8	8350.46	10023.9	8816.62	9788.76	9954.87	10648.7	10110.6	10590.1	13368.6	13476.7	9515.74	10666.2	14283.5	11549.6	10442.6	9613.72	6433.57	8444.84	10335.6	8861.7	10750.8	10648.8	7356.82	9009.9	7734.67	9683.62	8687.84	8289.89	6107.73	6837.87	8856.91	8132.91	9162.82	11210.6
318	PIK3CA	chr3:178951940-178952090	NA	21537.7	0	20373.4	21403.4	14546.8	12638.7	17211.2	15179.6	19608.5	22581.7	15858.8	23298.4	15405.7	18141.2	16853.9	17718.7	15780.6	20044.3	17850.8	17698.8	25095.3	24990.2	18884.7	19602.2	24104.8	21114.7	22930.2	20651.9	17631.6	21288.3	23366.2	21901.7	27451.5	29654.4	18274.3	18757.9	18505.4	21406	20026.3	20966.7	16171.5	18217.3	21238.7	20804.7	20143.6	26550.6
319	PIK3CA	chr3:178952061-178952218	NA	22250.3	3	23180.4	23396.4	16083.7	14280.7	17191.3	15517.6	20844.2	24681.5	15782.4	25402.2	16817.3	20281.7	17436.2	19366.3	18683.2	21248.4	18438.7	21170.9	27065.9	25865.9	17879.4	19645.2	24614.6	23159.3	24875.4	21921.3	16202.4	23127.3	24203	21312.3	26996	30036.4	17416.9	21620.5	18052.3	23929.3	20760.6	21382.3	15657.1	17994.3	21688.7	20123.9	20808.3	27590.7
234	PIK3R2	chr19:18273728-18273798	NA	8597.63	44	14697	14560	10663	9889	14908.8	15893	6779	6149	7743	7658	10291	8421	6201.97	10417	8566.97	6759	6176	7378	8161	9848	13686.9	8288	12378	13421	5943	6152	9384	7437	6199	8479	8034	8754	9574	6499	7917	5767	8279	8011	9193	12865	10164	14114	7072	6617
78	PTEN	chr10:89624217-89624318	NA	15921.4	0	19586	18499	14030	12502	20812	19228	14150.9	17601	13738	15563	17115	14601.6	12737	16378.9	13936	14993	12792	13940	15882	16852.6	16740	13563	18613	19415	12401	15666	14864	14995	14734	15575	16568	15682	18038	10135	13531	11382	14621	13972	14052	18559	15161	19397	14084	15818
80	PTEN	chr10:89685255-89685369	NA	9704.5	8	10988.7	13100.9	6164.01	5685.88	12000.9	7844	10648.9	15381.7	8766.88	10915.9	9812	10471.6	8691.52	10528	8724	10945.9	10092	10069.8	12157.6	12738.8	9724.88	10374.8	13521.6	12896.8	8756	9907.96	7434	7429.94	9600.94	8725.97	10433	9916	9605	6416	7045.9	8176	8981.85	8398	7524.88	7995	7648	8986.88	8678.82	9750.76
81	PTEN	chr10:89690773-89690877	NA	5700.97	96	10528	12603	6389.49	6293.98	12024.4	8470.94	10001	13700.9	8269.37	9308.4	9239.46	9490	8114.86	10284.3	8844.86	10915.9	9496.34	9148.49	10188.4	10540	9368.37	10106.9	13068.4	11951	5299	6856.98	5274	4801	5830	5742.94	5381	4420	7002	4472	4752	5449	5097	3440	4313	5586	4620	5718	6017	4984
85	PTEN	chr10:89692955-89693025	NA	5525.04	114	8045.04	9399.1	4950.03	4491	9262	7127.01	5874.04	7532.06	5669	6013.01	7507.06	6027	5454	7925	6647	6576.01	5860.03	6684	5729.04	6617	8941.13	5771	9497	9891	4702	4882	5342	4507	5014	4844	5085	5582	6002.01	3658.01	4794	4226	4252	3888	4788	5953	4752	7277	5782	5125
86	PTEN	chr10:89711839-89711986	NA	6240.79	94	9462.88	10435.8	5825.79	5180.86	7325.88	5369.89	7646.82	10584.7	5969.89	9449.77	6476.9	8335.69	6871.76	8017.89	8249.76	9342.4	8262.68	8828.73	11320.8	10551.8	7446.97	8982.55	10886.7	10597.9	7060.74	6444.83	4149.86	5764.86	7209.89	5423.54	6882.78	5713.93	4950.98	6213.86	4384.99	6989.8	5267.97	4024.99	3924.79	4529.96	5177.94	4674.84	5828.91	5805.97
87	PTEN	chr10:89711879-89712031	NA	17214.3	5	18856.5	19075.3	12217.7	10857.2	15601.3	12091.5	15831.4	22275.5	12798.7	22843	13794.8	16026	14893.7	15378.5	15008.4	17406.7	15747.5	16256.7	22133.8	20554.8	15636	16744.2	22017	18448.6	18199.7	17336.3	12094.7	19074.7	19384.6	15597.5	19896.4	21758.6	14771.8	15374.7	13532.7	17472.9	15177.4	16131.8	12230.7	12092.9	16773.5	16047.7	16253.6	22148.8
88	PTEN	chr10:89717562-89717709	NA	23381.5	0	21237.3	20821.2	15192.9	14300	19505.5	16909.8	18819.9	21394.7	16275	23731.4	16138.8	16704.9	18573.8	18389.8	17306.6	20298.8	17602.3	20070.5	26446.5	24549.5	18583.6	19475.7	25389.5	21979.3	23622.7	22550.7	18824.8	22815.3	25208.5	26154	31855.7	30883.7	19556.9	21514.4	20705.8	24061.9	23280.2	27535.4	19681.7	22742.5	24405.9	23581.7	21972.8	28967.7
89	PTEN	chr10:89717660-89717807	NA	6651.84	87	10160.8	11930.4	7668.91	6304.86	8709.45	6877.53	8839.63	11018.5	6435.95	10707.7	7541.81	9979.64	8013.61	8759.82	9586.79	9784.91	9103.94	9906.93	12171.4	11557.8	8059.83	9142.72	12889.4	11046.8	7063.76	5858.99	4260.89	6073.7	6937.95	6009.64	7327.8	5671.94	5776.61	6873.79	5203.76	7689.9	5921.89	3645.97	4090.83	4293.89	6140.97	5797.82	6772.95	6581.78
91	PTEN	chr10:89720706-89720859	NA	14158.1	15	17595.3	18696.4	11404.8	9932.73	13572.4	10837.6	14724.8	19925.9	11797.6	19030.2	12448.4	14735.5	12548.2	14776.4	14364.3	15908.2	14270.1	15222.2	20184.1	18266.4	12972	15738.9	20366.5	18010.8	15562.6	14213.6	9330.83	13753.6	15660.2	12152.4	15228.5	16207.7	10928.5	13431.4	10706.7	14551.3	11323.5	9703.88	9076.61	9491.64	12246.4	11775.8	12987.7	15306.6
92	PTEN	chr10:89720796-89720950	NA	12141	23	13110.4	14105.6	8626.86	7272.94	10149.3	7868.83	11908.3	15997.2	8757.39	15662.4	9375.72	11043.3	9801.86	10914.9	10997.1	12261.9	11589.6	11653.6	15828.5	14920.9	10862.7	11930.7	14861.5	14394.6	13587.7	11409.5	7650.98	10849.4	14277.1	9727.56	13059.6	13611.7	8751.58	10804.7	8862.73	11793.6	10266.9	9181.75	8084.72	7852.74	11076.7	9925.76	10770.9	12827.7
93	PTEN	chr10:89725037-89725153	NA	10019	13	12121	13874.8	7840.79	7545	14287	10535	11589	17438.8	10313.8	13583	10523	11404	10250	11701	9906	14057.9	10993.9	10582.9	13045.7	13171.9	11411.9	11220.9	15560	14814	9376	11637	8809.9	8528	9492.94	9355	10438	10002	9858.93	7806	7392	8415	9842	8688	8117.03	8712	8798	9970	9604	12208.9
94	PTEN	chr10:89725103-89725243	NA	11600.7	8	13536.8	14842	8375.86	7971.89	11888.8	8608.85	12865.8	16298	10379	14318.6	10752.8	12551	10663.9	12380.9	10761.6	13264.9	11828.9	12329.6	16102.6	15268.1	12188.9	13435.6	17395.9	14980	12272.5	12569.8	9416	10550.9	12619.8	11322.9	13524	12921.7	10539.9	9424.96	8930.89	11642.8	11030.9	10877	8603	9201.01	9977.89	9750.96	11068.7	12722.9
147	PTPN11	chr12:112884152-112884251	NA	14771.5	1	15212.5	17519	9496	9243	20146	14805	13278	17363	12842	13818	14984	13125	12046	15011	11899	14001	11787	12719	12938.8	14726.8	14035.6	12201.6	18348.6	17230	11153	13094.8	13225	11387.9	12805	13567	14536	14280	17020	8065	11009	10471	11631	11389	11356.9	14028.9	12196	16545	12661	13533
148	PTPN11	chr12:112888101-112888251	NA	22281.8	0	23447.7	23554.3	15880.7	15581.6	19552.5	16393.6	19813.7	23435.2	17715.8	25491.5	18395.8	20322.6	17793.1	18938.4	17987.5	20412.7	18802.2	20723.5	25392.6	25966.5	21387.1	21214.3	26819.8	22056.5	23628.6	21376.6	16971	22768.3	24961.5	22324.7	28744.3	28768.8	18588.2	21013.6	19055.3	24327.8	22218.2	22109.4	17525.6	18289.8	24041.3	20634.1	20675.7	29085
149	PTPN11	chr12:112888196-112888355	NA	23942.9	0	25139.2	22666.2	17748.5	16444.3	18898.6	19488.6	21200.2	23634.2	16393.3	28012.3	18113.7	20353.2	19490.4	19946.7	18435.4	21838.3	18281.9	21601.6	28817.2	26056.2	20354.5	21717.6	29088.8	25469.1	25317.5	21685.5	17075.5	25236.3	25506.3	23517.3	27078.4	30827.4	18402.2	22099.8	19090.1	24350.3	22422.8	22705.5	16856.6	18210.8	24249.6	24111.5	21366.8	29579.5
150	PTPN11	chr12:112890959-112891111	NA	10064.8	25	9160.79	12383.5	5499.69	4290.61	7485.54	4741.86	8534.88	11514.9	6570.71	10335.5	6505.92	7614.56	6161.86	7689.86	7487.95	8464.94	7972.69	8560.82	12181.6	12566.5	9232.97	9121.84	11821.8	11497.5	10501.9	8901.86	5888.92	8760.93	11601.7	8428.97	11668.8	13235.7	8020.76	7377.91	8095.82	9401.93	10148.1	10386.9	8167.83	8457.8	9300.42	9117.85	9367.73	12199.9
151	PTPN11	chr12:112891091-112891204	NA	16746.5	0	21010	20826	13467.9	12820.9	23792.5	20111.8	17079.9	18932.9	15631	16289.7	18134.9	16226.4	16623.6	17340.8	14357.7	17940.5	14814.7	14117.7	16774	19665.7	18003	16183	20735.8	19184	12482	14756	16761.9	13301.8	12889	17765.4	20657.9	16516	18883	11120	14788	12666	17177.9	17147.9	16156.9	19276	15448.8	19674.7	15284.8	17191.7
152	PTPN11	chr12:112892324-112892469	NA	16796.8	6	17707.4	19219.6	13804.9	11649.8	16005.5	13568.6	15588.8	19749.8	13595.5	20540.7	13440.6	15938.7	14612.2	15096.6	14704.8	17159.6	14459.5	16103.7	21138.7	20803.5	15506.8	17964.5	21238.6	19013.7	17393.7	17084.7	12125.3	15843.6	17809.7	16347.8	18951.6	20230.7	13089.8	15046.5	12996.8	16018.9	15678.8	15390.6	11886.8	13991.9	16383.8	15179.6	14931.8	20644.5
153	PTPN11	chr12:112893749-112893882	NA	12065.8	7	15093.8	15787.6	10454.3	9360.57	14502.7	11982.4	14010.8	17109.3	12295.7	15572.7	12381.7	13511.6	12321.4	13621.7	12104.4	14357.7	12958.6	13187.7	16547	16139.3	12432.5	14072.8	18696.5	15792.5	12029.7	13259.2	10065.8	11433.5	12830.6	12142.9	13730	13500.5	10506.9	10254.6	9532.93	11638.9	11039.8	10900.6	8697.9	10630.7	11457.5	11063.8	11261.9	13095.9
154	PTPN11	chr12:112910725-112910848	NA	5690.26	92	6657.76	7419.84	4409.96	4384.87	6806.86	4979.81	6172.86	8336.92	5617.92	6721.83	5613.92	6579.33	5685.67	6282.7	6054.78	7476.71	5984.81	6536.96	7542.6	7907.6	6392.65	6743.88	8220.38	7825.86	5624.94	5645	4293.94	4673.61	5719.92	5115	5822.93	5133	5013.03	4397	3964.92	5274.85	5324.99	4650.97	4050	4707	4613	5100.91	5239.88	5769.91
155	PTPN11	chr12:112915405-112915539	NA	14653.6	4	18327.8	20051.8	13935.7	12979.8	17906.7	15493.6	17417.8	20892.4	13879.9	19409.7	15183.6	16807.8	14811.8	16982.6	15741.8	19628.7	15571.9	16306.5	20904.7	20148.8	16122.5	18352.7	21845.6	19296.9	13773.7	15994	12554.8	13802.9	14823.5	15208.9	17647.7	14491.8	13282	13346.8	11249.8	14586	13539.9	12734	10466.9	12179	13747	13140.7	13428.9	16384
156	PTPN11	chr12:112915646-112915796	NA	12902.5	19	17168.7	17506.9	11953.4	10260.4	14616.4	11535.5	14718	17127.1	10905.8	17947.7	12217.8	14697.8	13261.5	13490.5	14626.7	15729.5	13649.5	15440.1	20131.9	18643.2	14265.1	16285.5	19714.7	17305.3	14450.2	12864.6	9139.46	12645.6	14809.5	12223.7	15515.3	14591.8	10436.3	13362.5	10335.2	14097.5	12311.6	10922.4	8387.64	9340.11	12985.5	10891.5	12271.5	14959.2
157	PTPN11	chr12:112915754-112915870	NA	13228.7	0	15477.8	17374.9	10641.9	10046.8	15869.6	13711.8	13166.6	16900.5	12700.8	14506	14074.7	13532.6	12106.8	13917.7	11461.9	14763.8	12585.8	12445.9	16045.6	18131.3	14251.7	14060.5	17585.8	16601.9	13039	13827.6	12578.9	12672.9	13515	14268.8	15555.8	14293	13563.5	9535.91	10758.8	11310	12582.6	13684.8	11248.9	13252.9	12272	13817.9	12068	14597.7
158	PTPN11	chr12:112919857-112920002	NA	9208.09	49	12320.4	13147.3	8476.4	8273.64	11245.4	8484.9	10859.9	14430.8	8566.5	12969.6	8936.9	11417.4	9554.58	10874.7	10691.3	12004.7	10869.7	11477.6	14522.6	14246.5	9996.84	11343.6	14960.6	13075.7	10120.9	8833.95	6585.97	8403.76	10116.9	8572.79	9911.91	8710	7302.71	9349.54	7292.97	10099.5	8389	6741.94	5722.92	6416.92	8699.79	8180.66	8510.86	10016.7
159	PTPN11	chr12:112924274-112924385	NA	10675.9	1	15785.7	14695	10793	10348.8	18548	16316	11548	12048.9	10508.9	10904.9	13177	11381.3	11652.8	12643	9698.92	13175.9	10353.9	10434	11910.2	13602.4	12436.9	11433.8	15613	14659.4	7855	10875	11203.4	8786.89	8686	11996	12111	9569	11404.4	7507	9699	8382	11743.8	12292.9	10212.9	13303	11534.9	12498.4	9308	11107
160	PTPN11	chr12:112924308-112924464	NA	27865.4	0	35358.9	27640.3	28999.5	25231.4	27546.9	28111.1	23643.8	19931	19936.8	29399.7	21376.6	22372.6	22024.3	21968	19846.4	25205.8	20586.8	20776.4	36294.1	32201	24329.5	26149.9	31297.3	27336.3	23829.5	22657.9	24407	28212.3	23305.8	32145	37808.9	31301	23585.6	28166.1	25690.3	24886	34325.3	34547.6	27209	30961.8	38952.5	30442.1	23721.9	31207
161	PTPN11	chr12:112926241-112926330	NA	9927.07	9	12247.9	11417	8091.87	7838	14852	12768	8031.01	8031.86	7941	8807	9875	8833	7507.92	9966	7916	9082	7132	7656	9430.7	9751	11230	8487	12409.9	12641	7191	7707	9868	8233	7503	9252	10447.9	9693	10865	6634.94	8604	6638	9946	8410	9834	14319	10675	13515	8667	8578
162	PTPN11	chr12:112926774-112926928	NA	19110.1	4	21998.3	19124.7	15742.5	13106.6	16281.9	14151.7	18118.2	19590.4	14966.4	21831.7	14776.6	17938.3	15700.8	15910.6	16033.8	17920.6	16071.2	17628.7	27313.6	23380.2	17878	19095.5	23817.5	21293.7	19404.5	17310.7	12926.5	19570.8	20587.4	17544.9	21344.6	24706.7	14193.8	18340.7	15187.5	19422.8	19587.3	18457.8	13021.8	14850.8	20308.6	17635.5	17236.8	23266.4
163	PTPN11	chr12:112926905-112927056	NA	17800.2	3	17677.3	16914.7	12746.9	10901.3	14952.8	12981.9	15072.8	17289.4	12169.9	19252.4	13530.8	14840.4	13904.7	14172.9	13044.6	16041.7	14997.6	14281.9	19842.6	21124.8	16121.9	14934.4	20469.4	17160.5	18175.8	18207.4	13768.8	18326.6	18273.3	17992.8	20653.8	22144.9	14540.9	14297.8	14458.5	17550.9	17803.6	18193.6	14758.7	15491.7	18622.6	17402.7	15978.9	22575.9
164	PTPN11	chr12:112939926-112940055	NA	16733.4	0	19869.3	19250.2	14046.5	12817.7	18837.2	16658	18080.3	20513.2	14839.5	18835.1	15969.4	16985.6	16061.1	16149.7	15243.6	18260.1	15792.5	16582.4	20246.8	21173.7	16796.1	16933.2	21570.3	19830.9	16365.8	18643	14826.4	16047	17837.9	18011.6	18569.8	17048.8	14681	14029.5	14559	15625.8	16446.8	17490.7	14837.9	15874.7	16532.7	15993.7	15229.8	20046.6
165	PTPN11	chr12:112940004-112940145	NA	17730.1	0	16871	17024.4	13009.4	10091.7	15486.8	13572.8	15670.6	18087.7	13137.8	17720.6	14113.9	15085.7	12582	14445.6	13514.8	16287.5	15066.7	16286.8	19235.8	17994.7	15310.6	13712.7	18623.3	18228.5	16937.9	16607.7	11962.8	16721.7	20271.7	16528.7	17208.6	19426.8	13843.6	14129.8	14409.9	15461.6	15396	14968.6	12113.7	11798.9	14367	16148.7	15617.8	21447.7
166	PTPN11	chr12:112942469-112942570	NA	11039.2	1	11764	14406	7211.95	7073	14590	11127	11193	13743	9940	10978	11606	10242.9	9582	11637	9618	11387	9145	9941	10415	11495.6	11498	9701	13768	13667.5	9127	10145	10201	8681	10088	10572	12237	11392	12688.5	6550	9102	8443	9438	9093	8922	12433	9218.52	12025	10219	10812
288	RAF1	chr3:12627226-12627383	NA	13704	9	13158.5	13375.2	8299.51	7354.58	10317.3	8101.66	11643.7	15191.4	9228.55	14747.2	9123.73	11525.3	9446.42	10685.8	10124.5	11797.7	10691.8	11626.3	16482.3	15087.8	10751.6	11419.7	15787.5	15383.6	14693.8	12566.4	8666.83	12865.9	16186.6	11598.8	15087.8	18221.6	10070	11813.8	10718.8	13385.6	12845.8	12641.7	9672.89	10139.9	12123.9	11501.8	12954.7	17522.4
289	RAF1	chr3:12629088-12629198	NA	9094.19	8	11432.1	13729.2	7746	7000	13968.9	9490	11036.9	16794.9	9798.97	10891	11082.9	10908	9190.94	11054.9	9416.99	12152	10259	9823.95	10932	11714	10775	10841.9	14567.9	13803	8598	10067	7831.82	7156.95	8686	8442	8877.94	7785	9339	6007.95	6799	7936.96	8152	7004.93	6951.72	8559.99	7124	8765.99	8733	9434.98
290	RAF1	chr3:12632295-12632445	NA	22582.5	0	27755.4	23544.3	19382.1	17426.7	21535.6	21304.3	18825.2	18980.6	16622.5	24186.4	16937.6	18666.3	19810.6	18995.5	17616.8	21722.4	17022.4	17390.8	28435.7	28111.7	21010.3	20851.6	26355.3	22195.1	19592	18513.5	17331.8	21485.6	19336.4	23468.6	30672.6	25098.5	19344	20220.8	19042.9	20621.8	24544.7	26520.8	20752.6	22089.9	27804.9	23237.5	18606.7	25358.5
291	RAF1	chr3:12641208-12641366	NA	20356.1	0	19738	20258.3	12970.9	11379.9	14880.4	12726.1	16681.5	18167.9	13892.6	22003	12585.7	15296.1	14930.7	14991.5	14444.5	16919.3	15580.6	15453.2	24517.9	22447.1	16039.2	18221.4	22107.8	19092.1	20444.7	17614.4	14022.3	19776.5	22328	19917.9	26244	28222.9	17143.2	19338.5	16894.8	20225.6	19956.1	20874.9	15084	17213.2	21484.3	20353.5	18962.1	24173.2
292	RAF1	chr3:12641880-12641934	NA	9657.14	41	16062	15848	12733	12989	15873	18375	9246	6630	8322	9555	12091	10377	8732	11665	9772	8825	6216	8745	10271	10693	16785	10346	14764	16181	6872	7694	9588	9631	7419	7881	12004	10602	10563	6851	9344	6708	8170	7659	10158	13364	11822.4	16614	8185	7341
293	RAF1	chr3:12645623-12645743	NA	22139.4	0	34654.3	26327.7	25297.6	23981.8	34325	33437.2	22062	20501.4	20538.8	23940.8	24126.8	21351.6	23334.2	22226.7	17685.8	24422.7	19099.3	18498.7	26196	27452.5	24353.7	23347.7	28697.2	27920.6	15634.9	19990.5	21950.5	19802.8	16266.9	24956.6	27191.9	19595.9	21565.5	16197.6	19125.4	15672.9	28035.6	27938.4	24689.4	30459.9	26378.2	26110.6	17705.7	21601.7
294	RAF1	chr3:12645726-12645877	NA	23835.7	0	24269.7	23848.3	17777.1	14254.1	19015.9	17585	20707.5	23507.3	15767.5	27105.7	17524.7	17996.7	16359.2	18642.5	16443.6	21342.5	18788.4	17617.3	29061.6	27139	19508.4	20018.8	26110.8	24327.9	26184.6	21887	16320.8	25491.3	27340.7	20411.4	24034.3	28650.1	16769.8	20374.7	19078.6	21088	24187	23931	17518.4	20681	23494.3	24214.5	21803.3	29132.6
295	RAF1	chr3:12647667-12647799	NA	13689.5	3	14866.9	17151	10174	8626	13992.9	10950	12931.6	18653.9	12070.8	15938	12510.6	13412	11102.8	12995.9	11644.9	14539.9	13175	12955	16871.8	17345	13826.8	14449.9	17669.7	16734.8	13322	13941.9	10783	12280	14929.9	13047	15479	16288.9	12390	10174	10991	13105	13681.9	13370	10944.9	12096	12048.9	12377	12399	15591
248	RALB	chr2:121036214-121036344	NA	16692.9	0	26724.2	21753.8	19885.5	16915.5	24885.2	23077.3	16403.5	16350	15508.1	18762.3	17540.1	17715.4	18341.3	17883.6	16030.8	18880.7	15214	13872.6	24041.8	24314.2	20448.8	17787.3	25736	21158.7	14387.5	15148.6	17506.6	16666.5	13925.5	20077.5	22193.5	17340.5	18557.3	15474.9	15753.7	15065.7	23195.8	22506.5	19118.3	20794.5	23264.2	19442.6	15005.5	17892.4
57	RET	chr10:43608997-43609159	NA	26321.8	0	27133.7	23335.5	19735.2	16529.9	19515.7	19086.2	20644.4	18660.8	16086.1	24844.8	15852	18347.3	17826.5	18053.9	17271.3	21616.5	17447	17641.5	31532.3	28932.6	22232.1	22434.6	27947.3	24294.4	20658.3	18668.7	18406.2	24388.5	21359.3	24884.9	34644.1	29603.6	22187.3	23468.2	21687.3	22800.6	29103.4	27864.2	23211.3	26483.8	32312.2	26350.5	22695.7	26815.3
58	RET	chr10:43609918-43610066	NA	23542.2	0	25031	20073.5	24536.7	23455.9	23039.8	26847.9	16685.8	13886.7	16855.9	19522.7	17171.7	19180.7	17862.9	16101.7	15844.6	18723.8	14172	14764.3	25249.9	24440.2	22187.5	21692.8	22943.8	21606.2	19029.9	19021.9	21256.8	23662.9	18906.8	26495.8	29378.7	23346.5	17965.8	23799.9	20094.8	19564.9	31835.7	31336.8	25724.9	36335.8	41298.4	28976.8	19805	24153.8
59	RET	chr10:43610037-43610197	NA	18704.6	0	25636	21053.7	19966.8	16086.5	20166.7	19747.6	16783.4	15343.4	14621.1	20980.5	15218.2	16086.3	17407.1	16378.8	16478.8	18615.2	15632.8	15751.1	25819	25490.6	20018.6	19236	23462.4	20750.3	16562.2	15406.8	13921.7	18935.1	16610.1	18372.2	21663.2	19425	15447.9	19059.1	16743	16754.4	21844.5	22413.5	15877	18952.5	26912.6	19052.9	17365.8	19921.6
60	RET	chr10:43612000-43612160	NA	24512.7	0	22669.7	22120.4	15658.3	13702.7	16096.3	14985.9	20239.7	20356.5	14885	23881.5	14669.7	17437.9	16420.9	16822.9	16251.8	20475.4	15464.7	17352	26535.8	24448.9	18505	18415.7	23232.2	19879.9	22918.6	20818.7	16996	23324.5	24132.1	22538.3	31368.3	33059.4	19805.6	22095.6	21203.6	24207.8	23527	22123.3	16817.6	22188.8	26677.7	24229.3	22963.6	28758.8
61	RET	chr10:43612111-43612253	NA	12211.8	0	15622.3	13514.5	11521.3	8968.51	13829.6	12125.7	11998.6	10859.8	10740.7	12029.9	10605.9	11378.4	11104.8	10665.8	9327.95	12364.2	10597.8	9784.85	14752.6	15178	12841.1	12489.3	17325.6	13818.6	11218.7	11073.7	11638.8	12175.9	11014.9	13555.8	15761.9	13802.7	11936.9	11256.9	11574.8	11328.7	15785.4	16350.8	12063.7	14048.8	16919.9	14106.9	11347.6	13896.7
62	RET	chr10:43613776-43613920	NA	17604.4	0	22489.7	19089.6	16042.7	14182.8	18064.8	17604.7	17427.9	15655.6	13582.7	19880.8	14388.8	15796.7	16765.6	14863.8	14971.6	17903.3	14095.8	13821.8	22090.8	21059.4	15879.8	17174.7	21757.5	17580.9	15000.9	14203.9	13834.7	16290.8	14422.9	17926.8	24588.6	19601.8	17817	14674.7	14885.9	15151.9	20590.5	19409	15192	18759.8	20891.7	17779.9	15238	19005
63	RET	chr10:43613866-43614009	NA	9115.2	25	11821.7	9931.78	8151.91	8020.87	10801.9	9722.76	7656.88	7503	7455.66	9155.79	7552.74	8068.78	8512.93	8506.71	7404.34	8916.88	7906.54	7289.69	11394.6	12483.2	9197.75	9097.69	11703.5	10410.5	8337.97	7581	7943	8945.99	8159.96	9422.92	11352.9	10039	7182.9	8305.95	8104.76	7633.99	11548.9	10884.5	8478.56	10693.9	12210.9	9673.5	7694.97	10023.9
65	RET	chr10:43615020-43615133	NA	8192.34	12	11754	10051	7234	6763.92	12696	10757	7337	7045.98	6839.91	7373.86	8510.02	6744.68	5373.83	8028.87	6514.02	8467	6754	5803.83	8029.93	9077	9349.9	7801.69	10630.8	10345	5583.93	6334	8244	5975	5474.95	8077.93	5987.93	6685	8452	5584	7357	5335.97	9666	9328.97	9054	11695	9537.86	10565	6948	6965
66	RET	chr10:43615051-43615203	NA	9478.18	62	16693.8	13548.7	12643.8	12322.8	14665.8	14298.2	10613.8	10263	9573.99	12029.6	10320	11621.7	11959.5	10673.4	11181	13304.7	9729.91	10151.8	15292.9	14733.9	11495.8	12627	15621.8	11970	8830.96	7945	8443	8359.81	7001	10788	10494.9	8591	8122.79	9332.95	9224.97	8998	13920	11871.8	9206.16	10877.9	13441.9	9857.91	8709.97	10942.8
67	RET	chr10:43615480-43615633	NA	14384.4	4	17395.7	14529.2	13696.4	11207.4	14085.9	12990.4	12454	13201.7	10923.4	15542	10646.7	13180.5	12516	12424.3	12415.3	14584.9	11570.6	12274.5	16852.8	17596	13388.3	14260.9	16464.3	15487.1	14072.5	12261.4	11635.2	14527.6	13409.3	15722.1	15344	16446.3	11824.3	13949.7	12922.2	13691.7	15445.4	14726.6	11988.3	14583.1	17849.4	15078	12579	17440.3
68	RET	chr10:43615610-43615739	NA	9969.23	1	11770.8	11570.5	7259.49	6766.59	11374.8	9047.55	8591.84	9656.58	8029.99	9676.89	8759.89	8713.98	8477.98	8817.85	7389.82	10088.8	8292.91	7535.87	10021.7	11250.7	9841.99	9948.78	12098.6	9992.57	8444.98	8801.89	9000.81	7990.93	8501.98	11368.7	11115.6	9940	9494.85	6920.89	8739.88	8119.62	11579.8	11410.8	9437.96	12250.9	11347.9	9983.99	8588.56	10017.7
69	RET	chr10:43617376-43617468	NA	12309.7	1	17117	16940	10136	11096	20153	17465	12550	14966	12196.8	12902.8	14661	13511	11795.9	15154	12255	14017	11132	12374	12874	13878	13987	11832	16875	17154	9372	10934	11833	9722	10104	11607	12366	11084	14577	8169	10733	8980	11135	10031	11011	14791	11610	15673	11036	11677
70	RET	chr10:43619115-43619239	NA	14016.4	0	16553	16426	10460.8	9529	16903	14541	13069.9	14855	12128	12938	12936	13133	9807	13424	11187.9	13225	11328.8	11215.8	14727.9	15700	14572	11996.8	17519	15876	10317	12714.4	12700	10730	11054	13995.7	12231	12609	13656	9427.94	11342.8	10352	14646.9	14360	12370.9	14352.8	13208	14088	11940	13887
71	RET	chr10:43619138-43619292	NA	27103.2	0	25943.6	23309.5	18295.1	15721.9	19532.9	19015.3	21760	21701.9	17044.7	25532.9	17932.5	18803.5	18266.7	19892.9	16306	22539.3	18643.5	19725.9	29743	28641.6	20777.7	19788.9	25306	22001.3	22480.8	22255.7	19020.9	24981.7	24231.4	27298.9	32592.6	31148.1	19948.3	23166.2	22733.6	24834.4	29549.6	27542.8	22882.3	23010.9	29880.5	27003.9	22752.5	30695.7
72	RET	chr10:43620317-43620438	NA	16816.6	2	19326	16896.9	13395	11968.9	19117.6	18171.9	15575.8	16377.9	9932	15877.9	16220.7	11323	11537.9	15455	5131.9	16394	12967	12182	17670.3	16849.9	15834	14368	18364	15838	11805	14282.9	10754.8	13748	12809	12797.9	16083	15663	8107	11618	13354.8	12381	18071	15988	16454	19796.7	16344	17396	14053	16559
73	RET	chr10:43622020-43622177	NA	13555.3	4	14123.9	13611.9	10039.5	8415.38	11264.5	9294.54	11692.2	13643.7	9565.92	15618.5	8639.61	11193	10266	11090.8	10347.6	12696.6	10966.6	10982.5	16826.5	15725.1	12035	12618.3	15694.3	13054.9	13277.6	11581.7	8401.19	12538.2	12962.3	11581.4	14526.7	16684.1	10134.4	12281.1	10360.5	12348.5	12544.4	13210.4	9555.55	9990.72	13692.3	12720.3	11003.6	15339.3
296	RHO	chr3:129247686-129247787	NA	6664.49	89	13976	12065	8853	9778	15847.6	12715.7	5755.03	4644	5364.94	5728	7047	5609	2095	7075	4484.92	7471.76	5340	4623.68	9253.3	10230	11515.1	9628	13301.9	11748.7	4248.99	4209	6444	4864	4169	6949	2012.68	5072	4741	4993	6425	4007	11552	10247	9051	15586	12145	12269	5472	5016
297	RHO	chr3:129247806-129247954	NA	21490.4	0	27935.6	23610.8	18756.8	19708.9	23925.6	22416.8	16540	15988	16966.5	19395.6	15898.7	14471.9	19692.8	18719.7	18071.8	21537.7	17072.7	16583	26604.6	27810.7	20177.9	21937.6	26446.6	22305.2	19474.7	16955.9	20906.4	20128.9	18697.8	24263.7	25896	22147.8	17222.8	20212.9	19809.8	19622.8	29981.8	27405.7	21108.9	28817	32733.8	26005.8	18491.9	23596.6
298	RHO	chr3:129249717-129249882	NA	11586.6	41	18618.1	14184.3	15331.3	13429	12715.4	14800.7	10995.8	10491.9	10631.3	13211.7	10285.2	11839.3	12146.4	11950.9	12404.1	13571.3	10900.2	12764.4	19104.9	16631.7	12604	13039.8	15846.6	14877.5	12951.6	10378.1	10067.1	13843.7	11408.5	12856.2	12654.1	12459.7	7754.49	14283.7	10202.3	11776.1	14087.1	13135.4	9184.3	12134.9	16747.5	12526.9	10708.2	13392.6
299	RHO	chr3:129251067-129251232	NA	24275.3	0	28715.4	22955.2	24074.3	19516.6	21439.9	22534.3	19455.7	18893.1	16737.5	24885.7	17587.9	19381.6	17669.6	18066.7	18912.6	21730.5	17285.5	18517.6	28368.7	28126	22022.5	20739.1	24985.8	24249.1	23351.4	22440.4	18605.7	26248.8	21803.9	26028.6	28553.2	27154.7	17933.5	26551.3	21216.5	23844.6	32015.1	27777.1	22407.6	27476	35094.7	27667.2	21642.3	29580.5
300	RHO	chr3:129251347-129251486	NA	19290.2	0	30821.6	24027	22061.8	19965	26255	26957.7	19830.8	19522.6	16734.8	22905.7	20757.9	18824.9	19896.7	18554.9	15851.7	23456.5	17463.9	16259.6	27512.8	26879.7	22193.5	22633.8	25677.7	23921.9	16024	19230.9	16295.9	18245.8	14522	20332.7	22854.8	18558.9	18864.7	17710.6	17501.8	17510.9	25266.8	26615.8	22633.7	23415.4	24849.8	22532.9	17336.9	23268
243	RPL13A	chr19:49993683-49993848	NA	25302	0	28145.8	25328.1	19980.7	17680.3	19979.9	19083.6	20412	19232.9	16119.4	25818.5	16501	17933.7	5926.96	17788	17097.3	19449.6	16691	18411.4	28415.4	29288.4	21360.6	22728.2	25020.2	22986.1	22823.1	19688.1	18885.6	24948.1	22339.1	25239.8	12346.4	29437.6	20915.9	23179	21050.8	23605.5	27308.6	28729.4	23320.2	24789.8	30521.5	27693.5	22569.1	30649.6
245	RPL13A	chr19:49995145-49995306	NA	15269.3	1	19895.2	16485.3	13387.7	10746.4	14342.6	12954.8	12863.6	12426.4	10187.8	16385	10565.3	12291.4	12204.4	12296.6	10175.5	14280.3	11543.5	10655	21457.4	19325.9	16128	14552.5	19484.7	16461.1	14798.5	11922.8	10669.4	15122.6	14344.6	15168.3	18569.3	19199.3	10827.4	14676.5	13324.1	14094.8	19812.1	18071.7	14527.6	14797.4	21533.9	16239.4	12790.5	18793.4
246	RPL13A	chr19:49995315-49995404	NA	9688.36	8	14842.8	14940.4	9466.42	9565	17665.8	15397.4	10479	10738.4	10250.8	10780	12995.4	10375.4	9553	12071.4	10536	11640.4	8833	10319.8	11568	11866	13537.4	9929.42	14285.4	15341.4	7865	8988	10505	8797	7952	10286.4	10290	9363	10167	7046	9140	7163	9934	8345	9639	13096	10592	13130	8903	9488
247	RPL13A	chr19:49995427-49995587	NA	17543.9	0	15670.6	17797.4	10828.6	8487.69	13409.9	11080.8	14360.7	15764.8	11196.5	17706.9	12063.9	12227.8	11996.9	12646.8	11304.2	13649.9	11969.8	12097.8	18390.9	18916.6	13601.8	12652.8	17435.8	15346.8	16707.8	14909.8	11775.7	16273.5	17473.6	15486.7	20934.5	23062.6	15200.9	13935.9	13620.8	16119.4	16811.6	17618	12505.7	13464.7	17166.9	16440.9	16426.9	21175.8
32	SHOC2	chr10:112724092-112724245	NA	14280.1	9	16236.8	17319.6	10949.2	9251.4	13890.5	10697.2	13695.1	18631.6	11009.7	18754.4	11659.1	13873.4	12186.5	12969	13773.8	15481.3	13072.5	14169	20857.7	17558.6	13615.8	15287.9	20879.3	18005	14596.5	13166	8555.68	12322.4	14361.3	11292.3	13679.7	14569.8	9716.83	12790.5	9571.63	13593.4	11600.1	10194.2	9059.62	8987.57	11914.6	11247.1	12179.6	14119.2
231	SMAD4	chr18:48591789-48591946	NA	19211.1	6	19131.8	18956.2	14453.2	12306.8	15213.3	14054.7	15748.9	18907.4	13821.3	21257.4	13798.2	16884.3	15276.5	15008.1	16119.7	16965	15198.7	17228.5	22747.3	22378.4	16498.9	18102.9	21345.9	19094.8	20426.1	18701.5	14552.6	18810.3	20673.2	18560.4	22636.5	23261.2	14368.8	19018.2	15777.8	20275	18297.3	18999.6	14381.3	16154.9	20114.1	18266.4	17367.4	24927.1
232	SMAD4	chr18:48591879-48592022	NA	11610.3	22	14843.6	15285.6	11061.9	9391.81	11930.9	10397	12879.8	14506.8	10713.8	16164.6	10852.5	14325.6	11911.4	12225.7	13166.8	15046.4	12699.1	13577.7	17710.4	16974.7	12373.3	14445.6	16815.8	15039	12524.8	11420.9	8282.73	11080.6	13029.7	11021	12180	11254.8	9395.88	10401.8	8023.97	11583.9	9993.92	8323.92	7957.6	9090.89	10200.9	10081.8	10173.9	10546.9
233	SMAD4	chr18:48604612-48604754	NA	10991.6	13	10924.9	10935.9	7705.97	6839.92	10141.8	8711.85	9596.83	11541.8	7804.78	11324.8	8574.94	9040.83	9016	9334.88	8613.98	10835.8	8927.8	9025.95	12497.8	12716.9	8459.9	9988.87	12309	11103	10372	10212.8	8407.8	9669.94	10750.9	10883.9	12000.7	12290.9	9043	8290.81	8372.94	9675	11096	11320.8	8386.94	9968.87	10878	10152.8	9748	12735.9
257	SOS1	chr2:39239345-39239473	NA	8122.49	23	10386.9	11054.9	6566.98	5954.93	11265.9	7889.76	9504.95	11822.8	8120.98	10087.9	8455.88	9355	8711.88	9394	8142.84	10757.6	9185.74	8642	10739.8	10782.8	8852.81	9710.85	13589.9	11832.8	7289.95	7616	6114	6421	7296	7359.94	8677.72	7320.98	7135	5992.86	5573.95	6897.97	7086	5903.98	5539	6259.85	6639.93	6791.89	7245.83	7330
259	SOS1	chr2:39240561-39240715	NA	8098.87	50	8952.48	10414.7	5912.62	5432.79	6850.9	5467.77	8431.7	10393.3	6215.88	10151.4	5993.68	7708.34	7017.78	7839.17	7910.86	8786.72	8102.73	8735.75	11395.6	10541.2	7313.72	8715.85	10271.6	9706.47	8778.73	7830.88	5043.7	7426.72	8809.75	7190.88	8740.35	9433.43	6261.52	7783.85	6117.52	8613.74	6850.72	6440.86	5042.66	5946.63	7224.7	6753.57	7908.65	8933.75
262	SOS1	chr2:39249709-39249863	NA	17631.5	14	16425.7	18701.7	12045.9	11015.7	14166.8	11548.6	13809.7	19292.7	13391.6	18891.6	12993.9	15379.4	13671.4	14070.8	13942.8	16310.8	15114.8	15930.4	20986.4	20343.3	15377.4	15934.5	20045.3	18626.6	18791.8	16557.6	12622	16695.6	19914.6	16900.5	18877.9	22287.8	12916.7	16022.8	13458.9	17765.6	16949.9	17585.9	13188.8	14234.7	17204.9	16478.5	16084.8	22028.6
263	SOS1	chr2:39249791-39249948	NA	18668.5	0	17040.2	17442.3	12151.4	10749.9	13869.6	12343.4	15819.4	18809.7	12682.8	19867.6	13927.3	15585.7	13623.6	15534.6	13689.6	16233.1	14223.2	15493.6	21558.5	20717.7	14745.7	15427.6	18794.6	18439.6	18394.5	17397.7	13112.5	18110.7	19743.7	16324.8	21333.4	23012.3	14984.7	16103.3	14259.6	18058.4	16462.5	17504.7	13200.8	14124.8	16696.4	17478.4	16543.8	22631.2
264	SOS1	chr2:39249884-39250032	NA	9158.81	47	9639.66	10649.9	6188.94	5780.96	8587.85	6433.78	7838.76	11443.7	7246.95	11087.7	7419.91	8482.88	7390.88	8307.86	8315.62	9379	8715.91	9046.75	12052.7	11798.5	7892.63	9202.88	12453.9	10845.7	9999.57	9160	6525.97	7789.94	9791.93	8099.8	9252.8	10302	6841.73	7589.97	6503.96	8710.97	8158.75	8379	6041.98	6783.91	8297.59	7578.96	7973.87	9973.86
265	SOS1	chr2:39249988-39250136	NA	11006.8	14	9161.34	10727.9	5549.93	5110.08	7667.95	5694.45	7911.37	11911.7	6799.27	10504.4	7443.03	7652.81	6889.29	7893.17	7001.24	8415.11	7984.13	8110.97	11489.2	10957.4	7870.38	8335.8	10581.8	10379.1	11387	9808.66	6968.01	9951.4	12191.6	9044.02	11194.4	14740.5	8096.31	8425.88	8402.09	10400.7	9578.89	10086.4	8097.65	8614.97	9718.01	9209.07	9621.95	12763.8
266	SOS1	chr2:39250084-39250236	NA	13844.9	18	17057.4	19128.9	12304.4	10791.8	14228.5	11204.6	14247.6	19434.2	11601.3	19563.2	12427.6	15134.3	13976.9	13892.7	14740.4	15877.4	14802.6	16113.7	21452.3	19509.7	14368.1	16949.2	20946.3	18158.2	14548.7	13301.3	8267.94	12576.6	14680.7	11932	14290.9	14904.7	10311.7	13818.8	10327.7	13887.5	11880.5	9519.75	8068.81	9122.81	12608.4	11262.9	13081.7	14219.9
267	SOS1	chr2:39250190-39250339	NA	15175.4	14	18867.6	19314.2	13646.3	12107.4	16191.4	13402.8	16739.7	18651.6	12298.6	19360.5	13720.5	16172.4	15026.7	15211.5	15760.3	17267.4	15242.5	15593.9	22899.1	20946.6	15454.3	17051.8	22459.3	18511.5	16220.6	14549.8	9895.61	13820.7	15374.2	12415.5	16699.2	15483.7	11645.9	13993.4	11143.5	14633	13087.6	11328.4	9596.75	9867.96	13944.6	12472.4	13515.7	16108.9
268	SOS1	chr2:39250286-39250402	NA	12615.2	5	15354.7	17721	10864	10170.5	17110.8	13684	16107	20011.8	12625.2	16170	14245.8	14070.9	12795	15648.8	12859	16553.9	13590	13333	16389.9	16728	14393	14202.9	18823.9	17456	11582.9	12971.9	10292.9	10525	12302.9	12547	11818	12466	13135	9620	10096	11565	11588.9	10132	9598.85	11085	10440.9	11615.9	11483.5	13241
269	SOS1	chr2:39251109-39251264	NA	7059.22	78	10824.5	13051.6	6838.45	5954.6	8867.63	5698.84	9162.84	12815.5	6789.65	12122.3	7403.86	9397.66	7717.4	9211.32	10053.7	10665.7	9465.53	10198.7	13690.7	11791.9	8878.48	10159.7	13639.6	11926.7	8237.71	7450.64	4757.77	6453.79	8248.8	6204.78	7509.57	6859.97	5967.83	6700.63	5680.92	7821.73	6582.8	4804.86	4491.97	5084.99	5919.83	5379.97	7008.87	6455.88
270	SOS1	chr2:39251167-39251304	NA	11783.6	14	14063.8	15362.4	9771.83	8448.83	12646	9640.91	13056.9	16324.4	10733.8	15189.8	10912.6	12969.6	11474.8	12576.6	11762.8	13729.6	12606.9	12419.8	15996.8	15825.8	11679	14052.8	16655.4	14369.9	11698.8	11248.7	7718.87	9819.88	11915	9855.83	11814.8	11175	9666.68	9642.8	8071	10946.9	8979	8329	6989	7431	9258.8	8651	10579.7	11233
272	SOS1	chr2:39262517-39262631	NA	9902.28	9	13151	15731	8630	7735.95	15149.9	10175.9	13987.9	16916.8	10776	13255.9	11717.9	13562.8	11066.7	13035	12429.8	14488.9	12635.6	12201.7	14394	14926.9	11547	13320.6	16464	15264.9	9740.72	10966	7747.95	8019.93	9334.94	10569.9	10034.7	8302	10809.9	7782.57	8062.97	9814	9671.89	7281.99	7046.95	8153.96	7896.94	8966	10287	10095.8
273	SOS1	chr2:39262602-39262701	NA	6228.5	55	6067.99	6861	3609.95	3390	7098.96	5283	6008.81	8058.9	5013	5743	6134	5599.96	4861	6446.95	4919	5739	5071	5277	5292	5944.96	5479.91	4836	6819.87	6787.86	6008	6234	5262	5364	6750	5635	6354	6569	6056	4025.95	4844	4921	5209	5085	4905	6178.92	4805	6959.92	6113	6511.87
274	SOS1	chr2:39278279-39278421	NA	12837.3	23	14319.1	15084.2	11395	8424.86	12609.9	9892.43	12856.9	16225	10606.4	15513.5	10687	12667.9	11102.5	12280.2	12358.8	13595.7	12798.9	13482.8	17648	16817.5	14760.8	13703.2	18566.7	17198	13630.7	12592.7	8435.92	11240.7	14280.6	11781.6	14528.7	14433.8	10945.5	10875.7	9372.85	12901.7	11479.6	11334	10225.8	9694.98	12491.7	11299.8	11693.7	14733
275	SOS1	chr2:39285797-39285932	NA	11718.4	11	15632.5	16958.9	9934	9591.92	15401.8	11565.9	14166	18948.8	12209.9	16452	12923	14370	12992	14240.8	12186.9	16788	14243.9	14267.7	17693.9	17216	12556	15146.7	18524.9	17645.9	11439	12267.9	9281	10033	12750.9	11875.2	13122.8	11795.9	11472	9801	8766	11049.9	10764.8	10244	8125.64	9286.85	10217.9	10307	11355.9	12865.9
446	TGFBR1	chr9:101900217-101900344	NA	8945.69	8	7622.68	7697.88	5315.96	4476.98	7471.96	6559.97	7417.95	9233.91	6348.74	8250.98	7316.91	7348.98	6116.95	7284.96	5886.97	7408.95	6484.64	6034.83	5945.97	6139.96	4848.96	4242.98	5844.96	5478.98	4971.98	5640.99	4536.98	5334.95	5883.93	5761.99	5724.98	6167.98	5786.95	4003.97	4079.98	4291.98	6864.98	6728.99	5988.97	6081.98	6223.95	6757.95	6065.95	8250.96
326	TGFBR2	chr3:30715591-30715750	NA	22306	0	23422.4	20832.7	17557.1	15660	17428.5	16673.6	17455.8	19994.4	15998.6	25105.1	15731.4	18765.9	18012.7	18102.1	17821.6	19479.3	16946.1	18116.9	25473	25255.8	17202.2	19594.8	22794.5	19923.2	20906.2	18499.5	15982.6	22588.2	22308.5	21844.4	28076.5	27286.4	17648.7	21784	18295.3	21500.1	21204.8	20990.5	16971.4	18743.6	25127.1	20945.4	18562.5	25210.5
327	TGFBR2	chr3:30729913-30730033	NA	11385.8	4	18365.2	16275.9	12237.6	10316.5	17705.7	16218.7	12495.7	15416.9	10836.5	14251.4	13512.6	12351.9	11296.9	13573.8	8025.67	15495.8	11971.7	12569.8	15874.5	16321.6	15354.4	13900.7	18736.9	18219.2	9763.99	12345.7	10716	10909.9	10686.2	12512	12338.9	11065.7	8251.91	10175.5	9720	10628.8	14215.3	13304.8	12268.9	13170.8	13439.7	14385	9885	12352.9
328	TGFBR2	chr3:30732901-30733050	NA	16396.3	0	20121.2	16730.8	14559.4	12147.8	15495.8	14008.7	13302.8	14896.5	13131.8	17841.4	12492.4	14838.8	14021.7	14270.4	13264.8	15368.5	12486.9	12494.9	20710.5	18071.3	15797.9	15961.5	19291.8	14971.7	13345.8	12921.9	12959.7	15268.8	14332.8	17644.7	19330.5	17211.9	13271	13938.6	12212.7	13572.9	17494.9	16237.8	14234.8	14311.7	18664.7	15391.6	13323	17020.8
329	TGFBR2	chr3:30732957-30733111	NA	14627.1	2	14713.8	14118.6	10331.6	9766.86	13014.6	11106.7	11508.7	13027	10439	13392.2	10420.6	11678.7	11138.3	11790.4	11225.4	12555.2	10577.7	11206.5	16322.6	16254.3	13051.8	12959.8	16075.6	14098.5	13881.9	12857	11351.7	13790.5	13891.6	15201.6	18978.9	19247.5	13116.7	13466.7	11694.7	13477.9	16840.6	16080.7	12746.9	15547.9	19218	15411.9	13393.6	17420.8
214	TP53	chr17:7572914-7573011	NA	15235	0	17624	16733.5	13064	11224	19486	18766	13060	13361	12746	12842	14934	13439	11215	14287	12481	13081	10200	11843	13902.7	14876	17120	12345	16963	17800	13191	13762	16420	15169	13132	15946	15779	14373	15805	9256	12881	9982	13500	13198	13861	20732	16134	18940.5	14528	14242
215	TP53	chr17:7573893-7574043	NA	23162.3	0	30723.8	25001.6	22266.1	21180.3	24260.2	25240.6	19184.3	16774.9	17296.5	23032.4	18081	19025.6	20781.3	18529.5	18018.9	20125.6	17789.6	16687.3	29249.8	29501.7	22090.1	23523.4	28137.7	23628.4	20097.6	18511.9	20305.5	24135.4	19865.5	26517.6	33794.5	26593.5	21149.2	22809.6	20545.2	21129.7	30319.7	31507.7	24347.8	29006.5	34088.5	25444.4	20387.3	25414.2
218	TP53	chr17:7576815-7576949	NA	18880.1	1	22125.7	19270.8	15235.6	12224.4	20813.7	17723.8	17557.5	21947.3	15369.9	19790	17004	18239.6	17013.7	17509.8	15146.7	19470.4	15953.9	16132.9	25610.3	22104.9	20800.8	18440.7	24437.5	22370.9	17933.7	17681	14621	16650.7	20221.6	18468.7	19601.8	20216.5	15424.7	14595.7	14048.8	16936.7	21478.6	17295.9	16341.7	15830.7	18812.6	18216.9	16965.8	21882.6
220	TP53	chr17:7577057-7577194	NA	20201	4	28683.7	25829.4	20985.6	19118.8	29628.4	26498.6	21418.4	24897.5	19224.6	23102.6	20706.8	19914.4	20920.7	23810.5	19105.3	23992.5	20002.8	20024.6	26290.2	28576.5	23052.7	22796.4	28541.1	25821.6	18630.9	23092	21501.6	21672.6	18902.9	24477.9	20918	22267.8	18627.7	17628	19336.8	19660.8	26110.6	26097.9	20721.9	24952.5	24959.8	23978.8	18562.9	27028.9
221	TP53	chr17:7577480-7577613	NA	18769.2	0	26558.7	21572.7	20038.8	19100.8	24082.8	25326.8	20224	18177.9	15947	20884	18725.7	19883.6	16868.6	17202.9	16836.9	20187.7	15082.9	15980.7	23376.9	24352.7	21387.6	20877	24399.5	22433.9	16042.8	17450	17183.8	16877.8	15563	22921.8	23211.9	18217.9	22606	14763.9	15872.9	16211	23196	24670	20700	23964.9	22960	21030.8	17019.9	20132.9
222	TP53	chr17:7578102-7578259	NA	14741.3	2	13181.5	12596.4	9876.22	7560.61	9971.71	9101.68	11355.4	11340.7	9066.43	12725.5	8572.77	10185.9	9899.54	9876.37	9595.85	10747.8	9160.85	10069.8	15784.5	13848.6	11072.5	11195.5	13428.4	13262.6	13759.8	12525.8	9951.83	15286.8	14861.6	13771.4	16540.8	18754	11176.7	13097.8	12201.8	13322.8	14715.7	13568.8	11630.4	13151.6	15643.6	15479.6	13312.4	17976.7
223	TP53	chr17:7578259-7578312	NA	6150	91	12379	11869	12774	10735	10847	14296	5976.37	3835	5985.98	6795	7738	6617.98	5029	7700.96	6756	5550	4423.96	5572.96	8153.96	8425	12756	7779	11867	13453	5141	5431	7113	7860	5555	6259	7334	8442	6157	5432	6536	4855	5984	5417	7411	10169	9116	12793	5025	4728
224	TP53	chr17:7578342-7578483	NA	21308.8	0	33732.2	27395.4	27369.8	25893.4	32090.1	31185.8	21635	17840.7	19081.4	22661.2	21330.9	21019.5	24088.5	21086.4	18754.5	25960.7	18436.5	16900.6	29363	28560.2	23773.1	25324.6	30639	25033.2	16109.9	18592.5	20503.7	19248.4	15470.3	25243.6	26452.4	19245.7	20416.4	18810.7	19453.7	17315.5	31605.6	30001.5	25857.8	30270	30729.5	26221.4	18017.5	22316.8
225	TP53	chr17:7578437-7578577	NA	25306.8	0	31997	25905.9	25906.5	21912.7	28804.1	27449.4	22584.3	21403.6	20208.5	26470.6	23235.8	23380.2	23019.4	22833.8	20195.4	26069.6	19785	19555.5	31604.8	30677.7	25023.2	25998.9	31539.3	26013.7	21769.6	23207	22612.3	24561.2	19955.7	27997.4	30487.7	26762.6	22763.6	21963.9	21839.1	21942.6	32087.7	30379.9	25711.4	29614.4	34056.6	29149.5	21514.7	28328.5
226	TP53	chr17:7579289-7579440	NA	16923.7	1	20016.3	18363.2	13867.6	13740.5	17205.3	15960.6	14958.9	13903.5	13686.6	16924	12616.8	13769.4	11513.5	13907.5	12945.5	16094.4	13112.8	13123.8	21375.6	21296.2	16737.3	16751.2	22032.4	17555.6	15568.7	13139.7	13346.6	15984.3	15420.6	17627.5	15052.7	18463	12995.9	15485.5	14269.7	15536.3	21146.9	21497.7	14378.7	18405.7	22811.9	17931.9	14773.7	19445.6
227	TP53	chr17:7579410-7579514	NA	7886.42	19	10317.6	9334.38	5954	6431.92	11936	9706.38	6719.51	6077.54	6618.1	6404.16	7500.16	6427.62	6966.49	7115.21	6338	7492.58	5922.9	5854	7599	8168.04	7896.02	7226.88	9909.87	9417.78	5052	5477	6857	5091	5133.48	6675	8665	6505	8385.74	4572.68	6057	5003.58	8158.58	7890.68	7547.71	10461.1	8244	9633.33	6604	6201.7
228	TP53	chr17:7579459-7579598	NA	17108.2	3	20519.5	16062.5	14507.8	12063	17142.2	16023.7	13590.7	16568.2	13513.4	16066.4	13940.3	14627.2	13812.8	15201.5	12536.6	16663.4	13530.7	14056.4	20945.6	19602.2	16563.5	14725.7	18363.7	17812.8	15363.9	16033.1	15821.9	16269.8	16435	19072.9	17043.3	17483	12245.9	14363.7	14357.8	15451	22493.9	18949.9	15855.6	18346.5	19015.8	18716.6	13760.7	21388.8
320	TP63	chr3:189582118-189582278	NA	18646.8	1	23465.6	20981.6	16941.5	13426.6	17270.3	15799.6	17775.1	20164.3	12527.5	24248.7	14557.7	15788.7	15749.1	16774	11812.8	18755.5	16629.5	18546.5	27759.2	23999.5	18748.5	18128.6	22736.2	20071.7	19798.5	17959.7	10934.7	19605.8	21775.8	16397.7	24236.3	24715.1	12419.6	19707.4	16778.4	20293	20504.4	20051.5	14706.9	14826.2	21712.4	19319.6	17823.8	24633.5
321	TP63	chr3:189584415-189584570	NA	10997.7	38	13369.4	15307.2	8844.83	7913.92	10894.8	7855.58	11678.9	15421.8	9791.87	15203.5	9924.81	11748.6	10664.5	11502.7	12066.4	12535.6	11461.5	12550.5	16551.5	16137.6	10838.3	13066.7	16370.5	14605.6	12113.8	10976.7	7059.83	10540.8	12256.9	10267.6	11823.7	12169.6	8132.73	10087.7	8199.72	12161.8	9695.81	8937.97	7299.75	8021.71	9612.83	8998.61	10612.8	11667.4
322	TP63	chr3:189584536-189584655	NA	18417.9	7	20602.9	21000.5	13867.4	7379.86	19854.8	17325.8	16568.9	20790.9	12851.9	17951	17506.6	15562.2	14448.9	15938	3347	17631.7	15157	13658.4	20349.9	20276.9	17713	10474	20628.7	19651.6	14711.8	16386.9	13367.9	14558.9	16135.6	16566	17610	18419	4251.91	11945.9	15094	12914.9	17811	18416.8	15849.9	10654	16299.9	18288.8	15866.8	17949.9
323	TP63	chr3:189585621-189585776	NA	20370.6	0	21141	21737.2	14224.1	12651.5	15663.8	13917.4	16863.9	21715.1	14394.8	24874.6	14328.5	16980.6	15820.2	16511.7	16592.2	18424.3	16606.8	17823	26975.6	24360	17083.8	18418.8	22949.4	20705.8	22315.2	18396.9	13188.4	21037.2	23711.1	18682.2	25865.1	28656.1	15432.2	19987.1	15965.3	21207.2	17862	19421.9	13560.2	15010.6	20443.5	18731.5	18049.6	25493.3
324	TP63	chr3:189586352-189586479	NA	15121.8	0	20272.9	20816.9	13520	11842.8	20422.7	16817.7	16796	18335.5	14786.8	17699.8	15235.5	15675.5	13528.8	16816	13973.8	19183.5	15375	15035.8	20320.3	19804.2	17292.8	16147	22201.8	19498.8	12400	14058.9	12281.9	12113.9	12760.9	15112	13359.9	13690.9	14096.7	11829.8	11532.6	12689.7	14670.8	14727.7	11903.8	12673	14136.9	14384.8	12660	15385
325	TP63	chr3:189586378-189586528	NA	25725.6	0	28744.2	25063.5	21585.4	16212.7	21856.2	21144.3	23682.1	21709.3	16607.4	28569.4	18339.4	21425.6	20020.6	20271.5	18754.3	22921.3	19809.5	17845.2	32831.5	28267.5	22539.2	19743.1	28277.6	22655.8	21067.5	20449.7	17025.5	23094.8	21966.8	22511.8	28788.6	29293.3	21015.6	21118.5	19964.6	19947.4	25013.3	26755.5	20876.4	19121.5	27565.7	24256	20810.5	27207.7
493	VHL	chr3:10183524-10183685	NA	10174.1	9	11182.1	8748.64	7471.9	5052.34	8545.86	7205.65	8004.2	6553.26	7390.85	10782.8	6048.02	9228.09	8900.31	8391.54	8560.75	9624.38	7606.98	7862.33	12301.1	11120.7	8061.27	7294.31	11477	8737.6	8843.72	6656.9	7762.38	9931.35	8231.63	11853.4	13192.9	12048.7	9608.83	10880.2	8604.37	9070.4	11738	10245.3	7965.07	8151.1	14060.5	9924.5	8407.15	9864.38
495	VHL	chr3:10188182-10188286	NA	12995.5	4	18086	16639	11590	10933	20401	17122	12812	16358	12819	13741	14978	13164	12773	15097	12500	15267	12115	12537	13852.9	15559	15123.2	13145	18428.4	17885	10858	12628	14179	11828	11860	15296	12342	11868	13248	9106	12045	11117	15040	14426	12574	17160	14344	16817	11433	14971.9
496	VHL	chr3:10188304-10188375	NA	8459.56	24	10067	11243.2	7933.08	6779	11285	10672	6316.1	6929.04	6939.04	7233.1	8443.12	7296.04	6568.04	8977	7791	6829	5570	7008.04	7730.96	8477.01	9956.96	6832.04	10484	11679	8476	7306	8553	9320	9076	8154	8338	9848	7718	6746	8016.04	6180	7766	6833	7741	11740	9495	13229	7883	8711
497	VHL	chr3:10191460-10191609	NA	20612.6	0	23529.8	23695.7	17800.6	15535.7	20268.7	18691.7	20106.7	21921.7	17126.7	24128.6	17283.8	19075.7	16410.8	20091.9	15245.6	20803.7	18454.7	17649.8	24816	26372.9	20214.8	20893.7	24422.4	23171.4	19543.9	19647.7	18648.6	20463.8	20860.8	23879.6	23038.9	24263.7	18159.7	17992.8	17357	21281.5	23468.8	23220.8	17472.9	19726.5	22835.3	21057.7	19457.7	25996.6
498	VHL	chr3:10191528-10191679	NA	14118.4	14	16227	15760.7	12338.8	10503.6	13860.8	12935	14135.7	15566	11090.8	16784.8	12236.5	13479.9	11888.6	13278	12827.8	14702.7	12513.9	13726.9	19234.7	19163.7	13361.7	14104.9	17839.9	15766.5	14215.8	13750.8	11169	13310	14567.9	13627.8	14598.8	16395.9	10787.8	14044.8	12365.7	14883	15151.8	15853	11314.9	12017.9	15908.6	15352.8	12529	17445.7
95	ZBTB16	chr11:113934000-113934127	NA	16493.6	0	23348.9	18872.7	15809.9	15193.6	22073.9	20134.9	16331	16283	14639.9	17495	16246	15675.9	15973	17130.8	13883	18399.9	14637.9	14280	20290.8	19759.5	17471	18739	21569.2	20956.7	13288.9	15182	15390	15153.8	13822.6	17094.9	19745.6	15746.9	15598.9	13154	14198.9	13427.8	19986.7	18903	16043.9	20167.9	19041.9	18401	13720.9	16996.8
96	ZBTB16	chr11:113934098-113934250	NA	27462.5	0	33878.4	29087.2	26309.9	23343.7	27002.4	26350.5	25586.7	24005.6	20639.6	30571.3	22607.8	24467.1	23538.5	24568.7	22107.7	27539.8	22669.6	23466.1	34477.6	33789	24786.6	27142.5	32896.2	30240.6	26101.5	25057.6	23657.7	29039.6	24973.9	29368.1	33087.4	31436.9	23042.5	26480.3	24778.7	27407.5	31873.1	32741.2	25473.8	30062.5	35247.6	30559.4	24756.8	34345.6
97	ZBTB16	chr11:113934204-113934350	NA	22054	6	29708.7	26470.4	21938.5	19964.7	25695.9	23154.4	22851.4	24882.7	20186.8	25817.7	21135.9	21952.4	21937.7	22387.5	19925.8	25387.6	22013.5	22049.2	29167.3	30978.5	22978.9	24546.8	30583.5	24283.8	23956.9	21852.7	19034.7	22194.7	22867.5	24285.9	23630.8	23882.9	17564.7	21925.9	20268	23406.9	27070.7	26472.7	19853.9	23884	27502.6	23531.7	21330.4	27196.8
98	ZBTB16	chr11:113934308-113934469	NA	23955.7	5	32084.4	27074.6	26166.3	24107.5	23964.7	25724.3	21158.6	19738.5	18458.5	26021.3	19693.2	22095.6	21219.6	22127	19999.2	24591.3	19826	20522.6	31399.6	31448.9	21597.3	24164.3	28537.4	24797	25081.5	21425.6	20547.7	25292.3	22804.4	25983.4	25026.5	27063.4	16084.8	26717.5	22092.7	23232.9	27692.6	28843.4	20246.5	24792.2	31276.6	25835.6	22060.7	29400.3
99	ZBTB16	chr11:113934364-113934522	NA	24654.4	2	31194	26192.4	24698.2	21484.5	24198.6	25819.2	22445.3	23109.3	19317.2	27798.1	19920.8	22081.5	21457.1	21854.5	21071.7	25396.5	21050.3	22368.7	31747.2	31429.4	25118.9	23536.3	30976.2	25608.2	26341.4	23820.5	21406.2	26289	24115.1	26061.7	27482.4	29691.5	17740.7	26636.9	21306.5	25427.7	29591.8	28551.6	21343.8	24840.4	32092.5	27373.1	23110.4	32576.4
100	ZBTB16	chr11:113934489-113934626	NA	17854.1	8	23319.3	20889.6	16760.3	16324.9	22980.2	20688.4	16541.2	18458.3	15986.4	18844.6	16974.9	16860.7	14695.8	18403.4	15935.5	19147.5	16479.8	16343.1	21811.4	23796.1	18899.5	19511.3	23969	20441.4	17100.6	17683.8	18105.3	18533.6	17252.4	21448.4	16473.6	19047.8	14933.7	15963.4	16340.7	16334.6	21537.6	23187.8	17756.7	23026.4	23332.7	21253.7	15846.6	22338.6
101	ZBTB16	chr11:113934613-113934752	NA	16787.5	0	21002.8	19383.7	16135	13015.4	19120.8	18204.8	15345.3	14052.2	13405.8	16319	14302	14975.9	16189.7	15273.5	12780.7	16310	13774.6	12935.6	20358.6	20220.7	14832.3	14859.3	20671.9	17241.8	14366.9	13907.9	13641.5	14786.9	14298	15776.3	18298.9	17265.9	13622.9	13804.8	14046.8	13355.9	20139.7	18210.8	14902.9	16782	19889	18227.9	14397.5	17538.8
102	ZBTB16	chr11:113934684-113934832	NA	20636.9	0	23742.6	19014.7	17275.6	15737.6	18874.3	17964.8	15838.5	12301.2	12620.3	18213.1	12876.8	14828.5	16039.7	14477.3	14635.4	16540.9	13532.5	12670.6	24153.1	21580.8	15815.1	17150.7	21604.8	17399	16080.8	12823.9	14298.7	17814.9	15080.9	17642.3	23436.2	21031.3	14987.6	16434.5	15645.9	14953.9	21855.6	21962.7	17810.6	20443.3	25463.6	20849.9	16008.5	17993.8
103	ZBTB16	chr11:113934775-113934930	NA	23713	0	29381.1	25061.1	24934	21929.4	26420.8	24230.8	20981.3	20716.1	19256.3	23764.9	19931.3	21302.4	22216.1	21337.1	18599.2	23715.5	19484	19876	27085.2	29459.4	23594.9	23685.2	29581.5	24522.7	22747.4	20706.6	22415.5	23431	21763.1	29239.2	26378.2	24999.2	17188.1	21956	20306.2	23541	30114.9	30707.2	23776.8	29293.4	34240.3	25885.7	20002.5	28693.3
104	ZBTB16	chr11:113934905-113935053	NA	18359.2	10	27465.5	21344.2	21955.5	18191.9	21854.4	22063.4	16661.2	17445.3	15202.3	21080.4	16710.8	16782.3	16640	18189	14871.8	19573.5	16067.6	16248.4	26201.3	25303.4	18553.5	17028.1	22903.9	19708.7	17840.9	17363.4	15994.5	18883.5	17018.4	20701.7	18324.5	20082.9	12924.8	18788.3	17358.3	17929.4	25337.3	23853.3	17890.5	20104.3	26408.2	21374.6	16096	23064.1
105	ZBTB16	chr11:113935022-113935156	NA	13538.5	0	19132.7	16567.5	13697.6	12658.6	18162.8	16908.9	13057.8	13232.7	10959.9	14424.5	12952.7	12062	12610	14335.8	11850.7	15041.3	12249.8	11507.8	17352.6	17520.5	15248.9	13920	20241.4	15699.3	10938.5	12011.7	10236.9	12528.8	10999.9	13452.5	14120.9	14153.8	12022.9	10993.9	11478.9	11126.5	16182.6	15646.7	12797.4	14957.8	16809.7	14808.8	11093.7	14789.5
106	ZBTB16	chr11:113935073-113935225	NA	22253.4	4	27901.1	22847.7	20016.9	18836.2	22081.6	22750.7	18545.1	20299.9	17849.2	23472.4	17547.2	18759.7	19619.1	19572.8	19116.7	22810.2	18012.4	19677.3	28410.5	27025.6	17728.5	20909.9	24294.5	23819	22093.9	19446.1	18901.1	21785.2	20509.5	23135.2	22139.1	23766.3	15834.9	21648.4	18229.6	19660.2	27298.2	27295.7	20448.8	23127.1	27667.2	25102.5	19593.4	28151.7
107	ZBTB16	chr11:113935178-113935312	NA	15721.7	1	22122.4	17589.7	16981.7	15039	21312.6	20715.4	15802.5	17155.5	16080	16420.9	16351.5	16210.6	16792.4	15467.5	13530.6	19283.7	13853.7	14442.7	20343.4	19531.4	15185.8	16837.3	20242.5	20445.1	14336	17113.5	17043.6	14862.5	14107.8	18421.8	17406.7	15104.8	13363.7	13964	13994.7	13853	21532.9	19822.5	15893.8	20765.6	21535.7	18604.9	14048	19518.7
108	ZBTB16	chr11:114027050-114027175	NA	25669.3	0	33169.4	30944.3	22367.2	21900.6	31080.2	29446.6	27571.7	27797.8	21408.9	27647.6	26569	23933.4	22084	25248.7	20541.9	27517.8	21054.9	21827.8	28613.1	30078.6	26325.7	25117	30091.1	27646.9	18357.9	25056.8	22802.9	20458.8	20077.9	28922	28659	25154.7	28915	17310.9	21742	20371.8	27213.9	28427	26173.9	31152.9	26937.9	27245.8	21201.9	25772.9
109	ZBTB16	chr11:114057665-114057768	NA	12630.4	0	19005	16601	13331	11104	18536	18865	12591	13439.9	12603	13098	14886	13755	11762	14323	12890	14226	11443	12315	14590	15680	14397	11827	15540	16662	9646	11622	13088	11141	10076	13676	12711	11433	12942	9199.01	10814	9502.98	13531	12491	11668	14344	12544	14877	10427	11536
110	ZBTB16	chr11:114112861-114113022	NA	9334.19	22	13132.5	10874.5	10501.8	9180.88	10436.5	10244.5	7445.88	6967.82	6489.72	9496.7	7070.72	8045.65	8937.73	7583.54	8253.78	8579.71	7638.81	7040.44	14147.7	11809.7	9265.62	9729.78	12317.4	9837.71	8353.79	6802.67	6080.54	9033.84	7669.75	8231.78	10093.6	9409.67	6077.63	8697.9	7094.51	6721.91	10743.8	10578.7	7801.87	9436.76	13273.8	9729.67	7244.77	9124.73
111	ZBTB16	chr11:114112927-114113062	NA	23959.3	0	34463.5	26942.9	27205.6	27096.9	31300.6	33388.7	22040.3	18108.8	19211.7	24536.9	23741.7	20927.3	23843.9	20655	18030.9	24765.9	19192.4	18147.8	28704	28554.8	24483.6	25570.9	29277.9	26315.9	17419.9	19981.8	21641.9	22520.6	16937.9	25698	29849	20846.9	21935	19256.9	20738	19005.9	30901	29500.9	26020.9	32392	30312.9	26817	19223.8	21882
112	ZBTB16	chr11:114117900-114118039	NA	18772.9	0	25489.7	20339.7	18667.8	16358	23319.9	21770.8	18837.8	17960.4	16589	20438.9	18048.8	17707	16746.7	17216.9	15033	20147.8	15690.9	16378.9	23393.7	24082.5	18762.8	19071	24824.6	20453.7	15389.9	17530.7	17795	16879	15566.7	21290	20601.7	17886.7	16192.9	14896.2	15825.5	17494	23224	21731.9	19625	20652	22844.7	19814.8	15305	20271
113	ZBTB16	chr11:114118013-114118167	NA	23545	0	32057.8	28048.7	23923.9	19424.9	27270.5	24181.6	23659.5	23149.8	19697.8	28710.5	20747.8	23154	21224.7	22532.1	20297.5	27099.7	21415.5	21858.7	34473.6	31603.7	24268.7	25513.5	33264	26347.8	22749.8	22159.6	20351.5	23998.5	22466.8	28158.6	26351.8	27440.8	19928.6	24909.8	21019.9	23488.1	30568.2	31589.8	22096.4	22832.8	32680.8	26246.5	21406.7	30632.5
114	ZBTB16	chr11:114121026-114121149	NA	12694.7	0	19796.2	16677	14937.9	11964.8	19474.1	18833.9	12673.7	12944.9	11946.8	12486.9	15114.6	12898.9	10362	13509.9	11367.9	15568.8	11952.9	11149.6	15842.5	17164.9	14777	12941.7	17161.8	15765	10168.9	12367.2	13386	11248.9	9750	15728	10830	12373	13123.9	11053.9	11794	10796	17386.9	18340.9	14367	15776.9	16479	15941.6	11400	14108.9
115	ZBTB16	chr11:114121129-114121255	NA	19110	0	31041.7	25136.9	22599.9	16635	28676.8	27959.8	15466	18924.7	18326.9	18626.9	21316.9	19037.9	14739.8	19137.9	15685.9	21261.9	15416	14848	25926.9	26021.9	22592.8	18666.9	25154.7	24194.9	12062	18182	20872	16379	14997	24189.9	16845	16536.9	17722	14465	15878	14339	26100	27031.9	21727	22462	25109	23572.9	13100.9	19099.9
116	ZBTB16	chr11:114121246-114121408	NA	11283.8	20	10535.7	10569.6	7752.61	5787.36	8215.1	6459.66	8316.62	10695.6	6844.31	12188.8	6954.63	8051.17	7136.39	7722.82	8057.56	8877.7	7807.48	8145.5	13285.7	11608	9097.23	7982.17	12241	10827.1	11484.3	9251.18	6694.39	10835.3	12232.1	9233.45	10919.1	15227.7	7725.55	9304.86	8293.61	11037.4	10687.9	9958.68	8404.71	7943.45	11434.5	10384.4	9971.94	13066.5
[truncated: 244 more columns]
