# Supplementary material for: Selfish mutations dysregulating RAS-MAPK signaling are pervasive in aged human testes
Source: Genome Res. 2018 Dec;28(12):1779–90. doi: 10.1101/gr.239186.118 (PMC6280762; doi:10.1101/gr.239186.118)
Supplement: Supplemental Material [file supp_gr.239186.118_Supplemental_Table_S3.xlsx]

## Sheet: Legend
Supplemental Table S3. Table of prioritized calls (Tiers 1, 2, 3, 4)
115 genomic variants at 105 genomic positions, with unique row for each biopsy positive for the variant (totalling 298 rows)
Legend
Column	Description	Annotation	Description
A	Variant tier	1	Replicated call (called in >1 amplicon or in biopsy replicate)
		1^	Same variant was replicated in another biopsy, but not this specific biopsy
		2	Called in a single amplicon, VAF ≧0.2%
		3	Called in a single amplicon, VAF 0.1-0.19%
		4	Called in a single amplicon, VAF <0.1%
B	Variant number (validated variants only)
C	Validation result	Positive	Validated
		Negative	Not validated
		NA	Not screened
D-J	Variant location and annotation
K-P	Variant annotation (gnomAD, dbSNP138, COSMICv82, ClinVAR, CADD)
Q	Library and biopsy ID	Library number_sample number_biopsy ID
R	Biopsy ID	R = second replicate
S	Details if position covered by >1 amplicon
T-W	Amplicon number, variant coverage, VAF and calling status for first amplicon
X-AA	Amplicon number, variant coverage, VAF and calling status for second amplicon (if relevant)
AB-AE	Amplicon number, variant coverage, VAF and calling status for third amplicon (if relevant)
AF	Details if variant was called in >1 amplicon
AG	Details if variant was called in both sample replicates
AH	Validation method	PCR	Validated by PCR
		Amplicon	Called in two amplicons (Tier1 variant)
		Inferred-same event	Same variant validated in same testis
		Replicate	Called in sample replicates (Tier1 variant)
		Inferred-same variant	Same variant validated in different testis
		smMIP	Validated by smMIP
		Amplicon/Inferred-same event	Called in two amplicons (Tier1 variant); variant validated by PCR/smMIPs in another biopsy in same testis
		Amplicon/Inferred-same mutation	Called in two amplicons (Tier1 variant); variant validated by PCR/smMIPs in another biopsy in different testis
		PCR & smMIP	Validated by PCR and smMIP
		not resequenced	Variant was not resequenced
AI-AL	Resequencing method, coverage and VAF (Q30 base quality, UMI = unique molecular index)

## Sheet: Table of prioritized calls
Inclusion tier (1^ = not replicated in that specific biopsy, but the same variant was replicated in others)	Variant number (validated variants only)	Validation result	Gene	Chromosome	Position (hg19)	Ref	Alt	Variant	Exonic Function	gnomAD_exome_ALL	gnomAD_genome_ALL	snp138	COSMIC v82	clinvar_20150629	CADD/Phred score	Library & Sample ID	Biopsy ID (R = 2nd replicate)	Overlapping amplicons?	1st amplicon ID	Coverage (1st amplicon)	VAF (%) (1st amplicon)	Called? (1st amplicon)	2nd amplicon ID	Coverage (2nd amplicon)	VAF (%) (2nd amplicon)	Called? (2nd amplicon)	3rd amplicon ID	Coverage (3rd amplicon)	VAF (%) (3rd amplicon)	Called? (3rd amplicon)	Replicated in another amplicon?	Called in sample replicate?	Validation method	PCR avg Q30 Freq (%)	PCR avg Q30 cvge	smMIP avg UMI Q30 Freq (%)	smMIP avg UMI Q30 cvge
1	1	Positive	AKT3	chr1	243668575	G	C	c.1416C>G (p.S472S)	synonymous SNV	0.0009	0.0033	rs148332912	0	0	5.575	Lib16_136_4D28R	4D28R	No	24	25165	0.1	Yes	-	-	-	-	-	-	-	-	-	Yes	PCR	0.11	100918	-	-
1	1	Positive	AKT3	chr1	243668575	G	C	c.1416C>G (p.S472S)	synonymous SNV	0.0009	0.0033	rs148332912	0	0	5.575	Lib3_188_4D28	4D28	No	24	26320	0.08	Yes	-	-	-	-	-	-	-	-	-	Yes	PCR	0.11	100918	-	-
1	2	Positive	APC	chr5	112175762	T	G	c.4471T>G (p.F1491V)	nonsynonymous SNV	0	0	0	0	0	26.2	Lib1_159_4C21	4C21	Yes	371	7345	0.163376	Yes	372	10379	0.770787	Yes	-	-	-	-	Yes	-	PCR & smMIP	0.55	155427	0.458979	6938
1	3	Positive	BRAF	chr7	140482928	G	C	c.1207C>G (p.P403A)	nonsynonymous SNV	1.219e-05	0	0	0	0	25.2	Lib2_174_4D10	4D10	Yes	400	6096	0.049213	No	401	8868	0.135318	Yes	-	-	-	-	No	Yes	Replicate	-	-	-	-
1	3	Positive	BRAF	chr7	140482928	G	C	c.1207C>G (p.P403A)	nonsynonymous SNV	1.219e-05	0	0	0	0	25.2	Lib16_134_4D10R	4D10R	Yes	400	14163	0.134152	No	401	21485	0.107051	Yes	-	-	-	-	No	Yes	Replicate	-	-	-	-
1	4	Positive	BRAF	chr7	140481402	C	G	c.1406G>C (p.G469A)	nonsynonymous SNV	4.062e-06	0	rs121913355	ID=COSM460;OCCURENCE=2(small_intestine),2(urinary_tract),11(haematopoietic_and_lymphoid_tissue),4(skin),2(eye),3(prostate),23(lung),5(large_intestine)	CLINSIG=pathogenic,pathogenic|pathogenic,pathogenic|pathogenic;CLNDBN=Non-small_cell_lung_cancer,Malignant_lymphoma\x2c_non-Hodgkin|Non-small_cell_lung_cancer,Cardio-facio-cutaneous_syndrome|Rasopathy;CLNREVSTAT=criteria_provided\x2c_single_submitter,no_assertion_criteria_provided|criteria_provided\x2c_single_submitter,criteria_provided\x2c_multiple_submitters\x2c_no_conflicts|criteria_provided\x…	27.5	Lib2_169_4D4	4D4	Yes	398	828	0.040877	No	399	16447	0.145923	Yes	-	-	-	-	NA - low coverage	Yes	PCR & smMIP	0.334783	66909	0.103066	3881
1	4	Positive	BRAF	chr7	140481402	C	G	c.1406G>C (p.G469A)	nonsynonymous SNV	4.062e-06	0	rs121913355	ID=COSM460;OCCURENCE=2(small_intestine),2(urinary_tract),11(haematopoietic_and_lymphoid_tissue),4(skin),2(eye),3(prostate),23(lung),5(large_intestine)	CLINSIG=pathogenic,pathogenic|pathogenic,pathogenic|pathogenic;CLNDBN=Non-small_cell_lung_cancer,Malignant_lymphoma\x2c_non-Hodgkin|Non-small_cell_lung_cancer,Cardio-facio-cutaneous_syndrome|Rasopathy;CLNREVSTAT=criteria_provided\x2c_single_submitter,no_assertion_criteria_provided|criteria_provided\x2c_single_submitter,criteria_provided\x2c_multiple_submitters\x2c_no_conflicts|criteria_provided\x…	27.5	Lib16_133_4D4R	4D4R	Yes	398	3221	0.031046	No	399	18578	0.19916	Yes	-	-	-	-	NA - low coverage	Yes	PCR & smMIP	0.334783	66909	0.103066	3881
1^	4	Positive	BRAF	chr7	140481402	C	G	c.1406G>C (p.G469A)	nonsynonymous SNV	4.062e-06	0	rs121913355	ID=COSM460;OCCURENCE=2(small_intestine),2(urinary_tract),11(haematopoietic_and_lymphoid_tissue),4(skin),2(eye),3(prostate),23(lung),5(large_intestine)	CLINSIG=pathogenic,pathogenic|pathogenic,pathogenic|pathogenic;CLNDBN=Non-small_cell_lung_cancer,Malignant_lymphoma\x2c_non-Hodgkin|Non-small_cell_lung_cancer,Cardio-facio-cutaneous_syndrome|Rasopathy;CLNREVSTAT=criteria_provided\x2c_single_submitter,no_assertion_criteria_provided|criteria_provided\x2c_single_submitter,criteria_provided\x2c_multiple_submitters\x2c_no_conflicts|criteria_provided\x…	27.5	Lib1_147_4C7	4C7	Yes	398	1582	0.252845	No	399	34460	0.319211	Yes	-	-	-	-	NA - low coverage	-	PCR & smMIP	0.398675	51922	-	-
1^	4	Positive	BRAF	chr7	140481402	C	G	c.1406G>C (p.G469A)	nonsynonymous SNV	4.062e-06	0	rs121913355	ID=COSM460;OCCURENCE=2(small_intestine),2(urinary_tract),11(haematopoietic_and_lymphoid_tissue),4(skin),2(eye),3(prostate),23(lung),5(large_intestine)	CLINSIG=pathogenic,pathogenic|pathogenic,pathogenic|pathogenic;CLNDBN=Non-small_cell_lung_cancer,Malignant_lymphoma\x2c_non-Hodgkin|Non-small_cell_lung_cancer,Cardio-facio-cutaneous_syndrome|Rasopathy;CLNREVSTAT=criteria_provided\x2c_single_submitter,no_assertion_criteria_provided|criteria_provided\x2c_single_submitter,criteria_provided\x2c_multiple_submitters\x2c_no_conflicts|criteria_provided\x…	27.5	Lib6_250_4G10	4G10	Yes	398	3081	0.129828	No	399	24099	0.240674	Yes	-	-	-	-	NA - low coverage	-	PCR & smMIP	0.338376	114961	0.499081	3807
1^	4	Positive	BRAF	chr7	140481402	C	G	c.1406G>C (p.G469A)	nonsynonymous SNV	4.062e-06	0	rs121913355	ID=COSM460;OCCURENCE=2(small_intestine),2(urinary_tract),11(haematopoietic_and_lymphoid_tissue),4(skin),2(eye),3(prostate),23(lung),5(large_intestine)	CLINSIG=pathogenic,pathogenic|pathogenic,pathogenic|pathogenic;CLNDBN=Non-small_cell_lung_cancer,Malignant_lymphoma\x2c_non-Hodgkin|Non-small_cell_lung_cancer,Cardio-facio-cutaneous_syndrome|Rasopathy;CLNREVSTAT=criteria_provided\x2c_single_submitter,no_assertion_criteria_provided|criteria_provided\x2c_single_submitter,criteria_provided\x2c_multiple_submitters\x2c_no_conflicts|criteria_provided\x…	27.5	Lib7_264_1D7	1D7	Yes	398	3578	0.111794	No	399	20442	0.161432	Yes	-	-	-	-	NA - low coverage	-	PCR & smMIP	0.224748	85874	0.118977	3362
1	5	Positive	BRAF	chr7	140449196	T	G	c.1883A>C (p.Q628P)	nonsynonymous SNV	0	0	0	0	0	23.7	Lib7_267_1D10A	1D10A	Yes	391	11772	0.118926	Yes	392	4189	0.262593	Yes	-	-	-	-	Yes	-	Amplicon	-	-	-	-
1	6	Positive	BRAF	chr7	140439614	G	T	c.2125C>A (p.Q709K)	nonsynonymous SNV	0	0	0	0	0	28.2	Lib16_136_4D28R	4D28R	No	389	13567	0.18	Yes	-	-	-	-	-	-	-	-	-	Yes	Replicate	-	-	-	-
1	6	Positive	BRAF	chr7	140439614	G	T	c.2125C>A (p.Q709K)	nonsynonymous SNV	0	0	0	0	0	28.2	Lib3_188_4D28	4D28	No	389	16269	0.34	Yes	-	-	-	-	-	-	-	-	-	Yes	Replicate	-	-	-	-
1^	7	Positive	FGFR2	chr10	123279677	G	C	c.755C>G (p.S252W)	nonsynonymous SNV	4.086e-06	0	rs79184941	ID=COSM4174758,COSM1152153,COSM36903,COSM915507,COSM915506;OCCURENCE=1(testis),48(endometrium),1(skin),2(ovary),2(breast)	CLINSIG=pathogenic|pathogenic;CLNDBN=Acrocephalosyndactyly_type_I|Endometrial_carcinoma;CLNREVSTAT=no_assertion_criteria_provided|no_assertion_criteria_provided;CLNACC=RCV000014191.22|RCV000014192.3;CLNDSDB=GeneReviews:MedGen:OMIM:Orphanet:SNOMED_CT|MedGen:OMIM:SNOMED_CT;CLNDSDBID=NBK1455:C0001193:101200:ORPHA87:205258009|C0476089:608089:254878006	33	Lib3_194_4D34	4D34	Yes	49	13999	0.007143	No	50	12282	0.138414	Yes	-	-	-	-	No	-	Inferred-same event	-	-	-	-
1^	7	Positive	FGFR2	chr10	123279677	G	C	c.755C>G (p.S252W)	nonsynonymous SNV	4.086e-06	0	rs79184941	ID=COSM4174758,COSM1152153,COSM36903,COSM915507,COSM915506;OCCURENCE=1(testis),48(endometrium),1(skin),2(ovary),2(breast)	CLINSIG=pathogenic|pathogenic;CLNDBN=Acrocephalosyndactyly_type_I|Endometrial_carcinoma;CLNREVSTAT=no_assertion_criteria_provided|no_assertion_criteria_provided;CLNACC=RCV000014191.22|RCV000014192.3;CLNDSDB=GeneReviews:MedGen:OMIM:Orphanet:SNOMED_CT|MedGen:OMIM:SNOMED_CT;CLNDSDBID=NBK1455:C0001193:101200:ORPHA87:205258009|C0476089:608089:254878006	33	Lib10_28_2F27	2F27	Yes	49	15950	0.112853	No	50	10589	0.406082	Yes	-	-	-	-	No	-	Inferred-same event	-	-	-	-
1^	7	Positive	FGFR2	chr10	123279677	G	C	c.755C>G (p.S252W)	nonsynonymous SNV	4.086e-06	0	rs79184941	ID=COSM4174758,COSM1152153,COSM36903,COSM915507,COSM915506;OCCURENCE=1(testis),48(endometrium),1(skin),2(ovary),2(breast)	CLINSIG=pathogenic|pathogenic;CLNDBN=Acrocephalosyndactyly_type_I|Endometrial_carcinoma;CLNREVSTAT=no_assertion_criteria_provided|no_assertion_criteria_provided;CLNACC=RCV000014191.22|RCV000014192.3;CLNDSDB=GeneReviews:MedGen:OMIM:Orphanet:SNOMED_CT|MedGen:OMIM:SNOMED_CT;CLNDSDBID=NBK1455:C0001193:101200:ORPHA87:205258009|C0476089:608089:254878006	33	Lib3_196_4D36	4D36	Yes	49	16904	0.011832	No	50	17162	0.419532	Yes	-	-	-	-	No	-	Inferred-same event	-	-	-	-
1^	7	Positive	FGFR2	chr10	123279677	G	C	c.755C>G (p.S252W)	nonsynonymous SNV	4.086e-06	0	rs79184941	ID=COSM4174758,COSM1152153,COSM36903,COSM915507,COSM915506;OCCURENCE=1(testis),48(endometrium),1(skin),2(ovary),2(breast)	CLINSIG=pathogenic|pathogenic;CLNDBN=Acrocephalosyndactyly_type_I|Endometrial_carcinoma;CLNREVSTAT=no_assertion_criteria_provided|no_assertion_criteria_provided;CLNACC=RCV000014191.22|RCV000014192.3;CLNDSDB=GeneReviews:MedGen:OMIM:Orphanet:SNOMED_CT|MedGen:OMIM:SNOMED_CT;CLNDSDBID=NBK1455:C0001193:101200:ORPHA87:205258009|C0476089:608089:254878006	33	Lib1_155_4C17	4C17	Yes	49	17064	0	No	50	14134	0.155653	Yes	-	-	-	-	No	-	Inferred-same event	-	-	-	-
1^	7	Positive	FGFR2	chr10	123279677	G	C	c.755C>G (p.S252W)	nonsynonymous SNV	4.086e-06	0	rs79184941	ID=COSM4174758,COSM1152153,COSM36903,COSM915507,COSM915506;OCCURENCE=1(testis),48(endometrium),1(skin),2(ovary),2(breast)	CLINSIG=pathogenic|pathogenic;CLNDBN=Acrocephalosyndactyly_type_I|Endometrial_carcinoma;CLNREVSTAT=no_assertion_criteria_provided|no_assertion_criteria_provided;CLNACC=RCV000014191.22|RCV000014192.3;CLNDSDB=GeneReviews:MedGen:OMIM:Orphanet:SNOMED_CT|MedGen:OMIM:SNOMED_CT;CLNDSDBID=NBK1455:C0001193:101200:ORPHA87:205258009|C0476089:608089:254878006	33	Lib2_169_4D4	4D4	Yes	49	17355	0.097954	No	50	12002	0.191635	Yes	-	-	-	-	No	No	Inferred-same event	-	-	-	-
1^	7	Positive	FGFR2	chr10	123279677	G	C	c.755C>G (p.S252W)	nonsynonymous SNV	4.086e-06	0	rs79184941	ID=COSM4174758,COSM1152153,COSM36903,COSM915507,COSM915506;OCCURENCE=1(testis),48(endometrium),1(skin),2(ovary),2(breast)	CLINSIG=pathogenic|pathogenic;CLNDBN=Acrocephalosyndactyly_type_I|Endometrial_carcinoma;CLNREVSTAT=no_assertion_criteria_provided|no_assertion_criteria_provided;CLNACC=RCV000014191.22|RCV000014192.3;CLNDSDB=GeneReviews:MedGen:OMIM:Orphanet:SNOMED_CT|MedGen:OMIM:SNOMED_CT;CLNDSDBID=NBK1455:C0001193:101200:ORPHA87:205258009|C0476089:608089:254878006	33	Lib5_217_4EE22	4EE22	Yes	49	20863	0.10545	No	50	21561	0.176244	Yes	-	-	-	-	No	-	Inferred-same event	-	-	-	-
1^	7	Positive	FGFR2	chr10	123279677	G	C	c.755C>G (p.S252W)	nonsynonymous SNV	4.086e-06	0	rs79184941	ID=COSM4174758,COSM1152153,COSM36903,COSM915507,COSM915506;OCCURENCE=1(testis),48(endometrium),1(skin),2(ovary),2(breast)	CLINSIG=pathogenic|pathogenic;CLNDBN=Acrocephalosyndactyly_type_I|Endometrial_carcinoma;CLNREVSTAT=no_assertion_criteria_provided|no_assertion_criteria_provided;CLNACC=RCV000014191.22|RCV000014192.3;CLNDSDB=GeneReviews:MedGen:OMIM:Orphanet:SNOMED_CT|MedGen:OMIM:SNOMED_CT;CLNDSDBID=NBK1455:C0001193:101200:ORPHA87:205258009|C0476089:608089:254878006	33	Lib3_193_4D33	4D33	Yes	49	15764	0.310835	Yes	50	14214	0.091459	No	-	-	-	-	No	-	Inferred-same event	-	-	-	-
1^	7	Positive	FGFR2	chr10	123279677	G	C	c.755C>G (p.S252W)	nonsynonymous SNV	4.086e-06	0	rs79184941	ID=COSM4174758,COSM1152153,COSM36903,COSM915507,COSM915506;OCCURENCE=1(testis),48(endometrium),1(skin),2(ovary),2(breast)	CLINSIG=pathogenic|pathogenic;CLNDBN=Acrocephalosyndactyly_type_I|Endometrial_carcinoma;CLNREVSTAT=no_assertion_criteria_provided|no_assertion_criteria_provided;CLNACC=RCV000014191.22|RCV000014192.3;CLNDSDB=GeneReviews:MedGen:OMIM:Orphanet:SNOMED_CT|MedGen:OMIM:SNOMED_CT;CLNDSDBID=NBK1455:C0001193:101200:ORPHA87:205258009|C0476089:608089:254878006	33	Lib1_149_4C10	4C10	Yes	49	17787	0.337325	Yes	50	30474	0.121415	No	-	-	-	-	No	-	Inferred-same event	-	-	-	-
1^	7	Positive	FGFR2	chr10	123279677	G	C	c.755C>G (p.S252W)	nonsynonymous SNV	4.086e-06	0	rs79184941	ID=COSM4174758,COSM1152153,COSM36903,COSM915507,COSM915506;OCCURENCE=1(testis),48(endometrium),1(skin),2(ovary),2(breast)	CLINSIG=pathogenic|pathogenic;CLNDBN=Acrocephalosyndactyly_type_I|Endometrial_carcinoma;CLNREVSTAT=no_assertion_criteria_provided|no_assertion_criteria_provided;CLNACC=RCV000014191.22|RCV000014192.3;CLNDSDB=GeneReviews:MedGen:OMIM:Orphanet:SNOMED_CT|MedGen:OMIM:SNOMED_CT;CLNDSDBID=NBK1455:C0001193:101200:ORPHA87:205258009|C0476089:608089:254878006	33	Lib4_214_4EE19	4EE19	Yes	49	20748	0.212069	Yes	50	15648	0.025562	No	-	-	-	-	No	-	Inferred-same event	-	-	-	-
1	7	Positive	FGFR2	chr10	123279677	G	C	c.755C>G (p.S252W)	nonsynonymous SNV	4.086e-06	0	rs79184941	ID=COSM4174758,COSM1152153,COSM36903,COSM915507,COSM915506;OCCURENCE=1(testis),48(endometrium),1(skin),2(ovary),2(breast)	CLINSIG=pathogenic|pathogenic;CLNDBN=Acrocephalosyndactyly_type_I|Endometrial_carcinoma;CLNREVSTAT=no_assertion_criteria_provided|no_assertion_criteria_provided;CLNACC=RCV000014191.22|RCV000014192.3;CLNDSDB=GeneReviews:MedGen:OMIM:Orphanet:SNOMED_CT|MedGen:OMIM:SNOMED_CT;CLNDSDBID=NBK1455:C0001193:101200:ORPHA87:205258009|C0476089:608089:254878006	33	Lib1_145_4C4	4C4	Yes	49	14802	0.479665	Yes	50	19042	1.93782	Yes	-	-	-	-	Yes	-	Amplicon	-	-	-	-
1	7	Positive	FGFR2	chr10	123279677	G	C	c.755C>G (p.S252W)	nonsynonymous SNV	4.086e-06	0	rs79184941	ID=COSM4174758,COSM1152153,COSM36903,COSM915507,COSM915506;OCCURENCE=1(testis),48(endometrium),1(skin),2(ovary),2(breast)	CLINSIG=pathogenic|pathogenic;CLNDBN=Acrocephalosyndactyly_type_I|Endometrial_carcinoma;CLNREVSTAT=no_assertion_criteria_provided|no_assertion_criteria_provided;CLNACC=RCV000014191.22|RCV000014192.3;CLNDSDB=GeneReviews:MedGen:OMIM:Orphanet:SNOMED_CT|MedGen:OMIM:SNOMED_CT;CLNDSDBID=NBK1455:C0001193:101200:ORPHA87:205258009|C0476089:608089:254878006	33	Lib6_252_4G12	4G12	Yes	49	18187	0.610326	Yes	50	12378	0.444337	Yes	-	-	-	-	Yes	-	Amplicon	-	-	-	-
1	7	Positive	FGFR2	chr10	123279677	G	C	c.755C>G (p.S252W)	nonsynonymous SNV	4.086e-06	0	rs79184941	ID=COSM4174758,COSM1152153,COSM36903,COSM915507,COSM915506;OCCURENCE=1(testis),48(endometrium),1(skin),2(ovary),2(breast)	CLINSIG=pathogenic|pathogenic;CLNDBN=Acrocephalosyndactyly_type_I|Endometrial_carcinoma;CLNREVSTAT=no_assertion_criteria_provided|no_assertion_criteria_provided;CLNACC=RCV000014191.22|RCV000014192.3;CLNDSDB=GeneReviews:MedGen:OMIM:Orphanet:SNOMED_CT|MedGen:OMIM:SNOMED_CT;CLNDSDBID=NBK1455:C0001193:101200:ORPHA87:205258009|C0476089:608089:254878006	33	Lib1_154_4C16	4C16	Yes	49	19185	0.750586	Yes	50	15247	0.518135	Yes	-	-	-	-	Yes	-	Amplicon	-	-	-	-
1	7	Positive	FGFR2	chr10	123279677	G	C	c.755C>G (p.S252W)	nonsynonymous SNV	4.086e-06	0	rs79184941	ID=COSM4174758,COSM1152153,COSM36903,COSM915507,COSM915506;OCCURENCE=1(testis),48(endometrium),1(skin),2(ovary),2(breast)	CLINSIG=pathogenic|pathogenic;CLNDBN=Acrocephalosyndactyly_type_I|Endometrial_carcinoma;CLNREVSTAT=no_assertion_criteria_provided|no_assertion_criteria_provided;CLNACC=RCV000014191.22|RCV000014192.3;CLNDSDB=GeneReviews:MedGen:OMIM:Orphanet:SNOMED_CT|MedGen:OMIM:SNOMED_CT;CLNDSDBID=NBK1455:C0001193:101200:ORPHA87:205258009|C0476089:608089:254878006	33	Lib15_122_4D3	4D3	Yes	49	19385	0.75316	Yes	50	10316	0.688251	Yes	-	-	-	-	Yes	-	Amplicon	-	-	-	-
1	7	Positive	FGFR2	chr10	123279677	G	C	c.755C>G (p.S252W)	nonsynonymous SNV	4.086e-06	0	rs79184941	ID=COSM4174758,COSM1152153,COSM36903,COSM915507,COSM915506;OCCURENCE=1(testis),48(endometrium),1(skin),2(ovary),2(breast)	CLINSIG=pathogenic|pathogenic;CLNDBN=Acrocephalosyndactyly_type_I|Endometrial_carcinoma;CLNREVSTAT=no_assertion_criteria_provided|no_assertion_criteria_provided;CLNACC=RCV000014191.22|RCV000014192.3;CLNDSDB=GeneReviews:MedGen:OMIM:Orphanet:SNOMED_CT|MedGen:OMIM:SNOMED_CT;CLNDSDBID=NBK1455:C0001193:101200:ORPHA87:205258009|C0476089:608089:254878006	33	Lib8_282_2F10	2F10	Yes	49	19902	1.26118	Yes	50	13384	1.83054	Yes	-	-	-	-	Yes	-	Amplicon	-	-	-	-
1	7	Positive	FGFR2	chr10	123279677	G	C	c.755C>G (p.S252W)	nonsynonymous SNV	4.086e-06	0	rs79184941	ID=COSM4174758,COSM1152153,COSM36903,COSM915507,COSM915506;OCCURENCE=1(testis),48(endometrium),1(skin),2(ovary),2(breast)	CLINSIG=pathogenic|pathogenic;CLNDBN=Acrocephalosyndactyly_type_I|Endometrial_carcinoma;CLNREVSTAT=no_assertion_criteria_provided|no_assertion_criteria_provided;CLNACC=RCV000014191.22|RCV000014192.3;CLNDSDB=GeneReviews:MedGen:OMIM:Orphanet:SNOMED_CT|MedGen:OMIM:SNOMED_CT;CLNDSDBID=NBK1455:C0001193:101200:ORPHA87:205258009|C0476089:608089:254878006	33	Lib9_3_1D15a	1D15a	Yes	49	19923	1.24479	Yes	50	11206	0.803141	Yes	-	-	-	-	Yes	-	Amplicon	-	-	-	-
1	7	Positive	FGFR2	chr10	123279677	G	C	c.755C>G (p.S252W)	nonsynonymous SNV	4.086e-06	0	rs79184941	ID=COSM4174758,COSM1152153,COSM36903,COSM915507,COSM915506;OCCURENCE=1(testis),48(endometrium),1(skin),2(ovary),2(breast)	CLINSIG=pathogenic|pathogenic;CLNDBN=Acrocephalosyndactyly_type_I|Endometrial_carcinoma;CLNREVSTAT=no_assertion_criteria_provided|no_assertion_criteria_provided;CLNACC=RCV000014191.22|RCV000014192.3;CLNDSDB=GeneReviews:MedGen:OMIM:Orphanet:SNOMED_CT|MedGen:OMIM:SNOMED_CT;CLNDSDBID=NBK1455:C0001193:101200:ORPHA87:205258009|C0476089:608089:254878006	33	Lib8_280_2F8	2F8	Yes	49	19946	0.391056	Yes	50	12252	0.46523	Yes	-	-	-	-	Yes	-	Amplicon	-	-	-	-
1	7	Positive	FGFR2	chr10	123279677	G	C	c.755C>G (p.S252W)	nonsynonymous SNV	4.086e-06	0	rs79184941	ID=COSM4174758,COSM1152153,COSM36903,COSM915507,COSM915506;OCCURENCE=1(testis),48(endometrium),1(skin),2(ovary),2(breast)	CLINSIG=pathogenic|pathogenic;CLNDBN=Acrocephalosyndactyly_type_I|Endometrial_carcinoma;CLNREVSTAT=no_assertion_criteria_provided|no_assertion_criteria_provided;CLNACC=RCV000014191.22|RCV000014192.3;CLNDSDB=GeneReviews:MedGen:OMIM:Orphanet:SNOMED_CT|MedGen:OMIM:SNOMED_CT;CLNDSDBID=NBK1455:C0001193:101200:ORPHA87:205258009|C0476089:608089:254878006	33	Lib8_276_2F23	2F23	Yes	49	20004	0.334933	Yes	50	13740	0.458515	Yes	-	-	-	-	Yes	-	Amplicon	-	-	-	-
1	7	Positive	FGFR2	chr10	123279677	G	C	c.755C>G (p.S252W)	nonsynonymous SNV	4.086e-06	0	rs79184941	ID=COSM4174758,COSM1152153,COSM36903,COSM915507,COSM915506;OCCURENCE=1(testis),48(endometrium),1(skin),2(ovary),2(breast)	CLINSIG=pathogenic|pathogenic;CLNDBN=Acrocephalosyndactyly_type_I|Endometrial_carcinoma;CLNREVSTAT=no_assertion_criteria_provided|no_assertion_criteria_provided;CLNACC=RCV000014191.22|RCV000014192.3;CLNDSDB=GeneReviews:MedGen:OMIM:Orphanet:SNOMED_CT|MedGen:OMIM:SNOMED_CT;CLNDSDBID=NBK1455:C0001193:101200:ORPHA87:205258009|C0476089:608089:254878006	33	Lib14_94_4B18	4B18	Yes	49	20221	0.969289	Yes	50	13486	1.18642	Yes	-	-	-	-	Yes	-	Amplicon	-	-	-	-
1	7	Positive	FGFR2	chr10	123279677	G	C	c.755C>G (p.S252W)	nonsynonymous SNV	4.086e-06	0	rs79184941	ID=COSM4174758,COSM1152153,COSM36903,COSM915507,COSM915506;OCCURENCE=1(testis),48(endometrium),1(skin),2(ovary),2(breast)	CLINSIG=pathogenic|pathogenic;CLNDBN=Acrocephalosyndactyly_type_I|Endometrial_carcinoma;CLNREVSTAT=no_assertion_criteria_provided|no_assertion_criteria_provided;CLNACC=RCV000014191.22|RCV000014192.3;CLNDSDB=GeneReviews:MedGen:OMIM:Orphanet:SNOMED_CT|MedGen:OMIM:SNOMED_CT;CLNDSDBID=NBK1455:C0001193:101200:ORPHA87:205258009|C0476089:608089:254878006	33	Lib8_287_2F15	2F15	Yes	49	21658	0.572537	Yes	50	15109	0.456681	Yes	-	-	-	-	Yes	-	Amplicon	-	-	-	-
1	7	Positive	FGFR2	chr10	123279677	G	C	c.755C>G (p.S252W)	nonsynonymous SNV	4.086e-06	0	rs79184941	ID=COSM4174758,COSM1152153,COSM36903,COSM915507,COSM915506;OCCURENCE=1(testis),48(endometrium),1(skin),2(ovary),2(breast)	CLINSIG=pathogenic|pathogenic;CLNDBN=Acrocephalosyndactyly_type_I|Endometrial_carcinoma;CLNREVSTAT=no_assertion_criteria_provided|no_assertion_criteria_provided;CLNACC=RCV000014191.22|RCV000014192.3;CLNDSDB=GeneReviews:MedGen:OMIM:Orphanet:SNOMED_CT|MedGen:OMIM:SNOMED_CT;CLNDSDBID=NBK1455:C0001193:101200:ORPHA87:205258009|C0476089:608089:254878006	33	Lib8_272_2F18	2F18	Yes	49	23664	0.245098	Yes	50	15482	0.187314	Yes	-	-	-	-	Yes	-	Amplicon	-	-	-	-
1	7	Positive	FGFR2	chr10	123279677	G	C	c.755C>G (p.S252W)	nonsynonymous SNV	4.086e-06	0	rs79184941	ID=COSM4174758,COSM1152153,COSM36903,COSM915507,COSM915506;OCCURENCE=1(testis),48(endometrium),1(skin),2(ovary),2(breast)	CLINSIG=pathogenic|pathogenic;CLNDBN=Acrocephalosyndactyly_type_I|Endometrial_carcinoma;CLNREVSTAT=no_assertion_criteria_provided|no_assertion_criteria_provided;CLNACC=RCV000014191.22|RCV000014192.3;CLNDSDB=GeneReviews:MedGen:OMIM:Orphanet:SNOMED_CT|MedGen:OMIM:SNOMED_CT;CLNDSDBID=NBK1455:C0001193:101200:ORPHA87:205258009|C0476089:608089:254878006	33	Lib4_216_4EE21	4EE21	Yes	49	24187	0.735933	Yes	50	12850	1.43969	Yes	-	-	-	-	Yes	-	Amplicon	-	-	-	-
1	7	Positive	FGFR2	chr10	123279677	G	C	c.755C>G (p.S252W)	nonsynonymous SNV	4.086e-06	0	rs79184941	ID=COSM4174758,COSM1152153,COSM36903,COSM915507,COSM915506;OCCURENCE=1(testis),48(endometrium),1(skin),2(ovary),2(breast)	CLINSIG=pathogenic|pathogenic;CLNDBN=Acrocephalosyndactyly_type_I|Endometrial_carcinoma;CLNREVSTAT=no_assertion_criteria_provided|no_assertion_criteria_provided;CLNACC=RCV000014191.22|RCV000014192.3;CLNDSDB=GeneReviews:MedGen:OMIM:Orphanet:SNOMED_CT|MedGen:OMIM:SNOMED_CT;CLNDSDBID=NBK1455:C0001193:101200:ORPHA87:205258009|C0476089:608089:254878006	33	Lib9_5_1D16	1D16	Yes	49	24573	0.712164	Yes	50	16079	0.429131	Yes	-	-	-	-	Yes	-	Amplicon	-	-	-	-
1	7	Positive	FGFR2	chr10	123279677	G	C	c.755C>G (p.S252W)	nonsynonymous SNV	4.086e-06	0	rs79184941	ID=COSM4174758,COSM1152153,COSM36903,COSM915507,COSM915506;OCCURENCE=1(testis),48(endometrium),1(skin),2(ovary),2(breast)	CLINSIG=pathogenic|pathogenic;CLNDBN=Acrocephalosyndactyly_type_I|Endometrial_carcinoma;CLNREVSTAT=no_assertion_criteria_provided|no_assertion_criteria_provided;CLNACC=RCV000014191.22|RCV000014192.3;CLNDSDB=GeneReviews:MedGen:OMIM:Orphanet:SNOMED_CT|MedGen:OMIM:SNOMED_CT;CLNDSDBID=NBK1455:C0001193:101200:ORPHA87:205258009|C0476089:608089:254878006	33	Lib10_23_2F3	2F3	Yes	49	26351	1.15745	Yes	50	13422	1.74341	Yes	-	-	-	-	Yes	-	Amplicon	-	-	-	-
1^	8	Positive	FGFR2	chr10	123279674	G	C	c.758C>G (p.P253R)	nonsynonymous SNV	0	0	rs77543610	ID=COSM1152152,COSM5575603,COSM915505,COSM49170,COSM915504;OCCURENCE=1(ovary),1(upper_aerodigestive_tract),1(stomach),5(endometrium),1(lung)	CLINSIG=pathogenic;CLNDBN=Acrocephalosyndactyly_type_I;CLNREVSTAT=no_assertion_criteria_provided;CLNACC=RCV000014193.23;CLNDSDB=GeneReviews:MedGen:OMIM:Orphanet:SNOMED_CT;CLNDSDBID=NBK1455:C0001193:101200:ORPHA87:205258009	27.6	Lib4_214_4EE19	4EE19	Yes	49	20748	0.00482	No	50	15648	0.102249	Yes	-	-	-	-	No	-	Inferred-same event	-	-	-	-
1^	8	Positive	FGFR2	chr10	123279674	G	C	c.758C>G (p.P253R)	nonsynonymous SNV	0	0	rs77543610	ID=COSM1152152,COSM5575603,COSM915505,COSM49170,COSM915504;OCCURENCE=1(ovary),1(upper_aerodigestive_tract),1(stomach),5(endometrium),1(lung)	CLINSIG=pathogenic;CLNDBN=Acrocephalosyndactyly_type_I;CLNREVSTAT=no_assertion_criteria_provided;CLNACC=RCV000014193.23;CLNDSDB=GeneReviews:MedGen:OMIM:Orphanet:SNOMED_CT;CLNDSDBID=NBK1455:C0001193:101200:ORPHA87:205258009	27.6	Lib9_7_1D17b	1D17b	Yes	49	18898	0.179913	Yes	50	12296	0.073195	No	-	-	-	-	No	-	Inferred-same event	-	-	-	-
1^	8	Positive	FGFR2	chr10	123279674	G	C	c.758C>G (p.P253R)	nonsynonymous SNV	0	0	rs77543610	ID=COSM1152152,COSM5575603,COSM915505,COSM49170,COSM915504;OCCURENCE=1(ovary),1(upper_aerodigestive_tract),1(stomach),5(endometrium),1(lung)	CLINSIG=pathogenic;CLNDBN=Acrocephalosyndactyly_type_I;CLNREVSTAT=no_assertion_criteria_provided;CLNACC=RCV000014193.23;CLNDSDB=GeneReviews:MedGen:OMIM:Orphanet:SNOMED_CT;CLNDSDBID=NBK1455:C0001193:101200:ORPHA87:205258009	27.6	Lib9_1_1D13	1D13	Yes	49	26084	0.06134	Yes	50	14642	0.00683	No	-	-	-	-	No	-	Inferred-same event	-	-	-	-
1	8	Positive	FGFR2	chr10	123279674	G	C	c.758C>G (p.P253R)	nonsynonymous SNV	0	0	rs77543610	ID=COSM1152152,COSM5575603,COSM915505,COSM49170,COSM915504;OCCURENCE=1(ovary),1(upper_aerodigestive_tract),1(stomach),5(endometrium),1(lung)	CLINSIG=pathogenic;CLNDBN=Acrocephalosyndactyly_type_I;CLNREVSTAT=no_assertion_criteria_provided;CLNACC=RCV000014193.23;CLNDSDB=GeneReviews:MedGen:OMIM:Orphanet:SNOMED_CT;CLNDSDBID=NBK1455:C0001193:101200:ORPHA87:205258009	27.6	Lib14_102_4F7	4F7	Yes	49	16012	0.549588	Yes	50	12102	0.570154	Yes	-	-	-	-	Yes	-	Amplicon	-	-	-	-
1	8	Positive	FGFR2	chr10	123279674	G	C	c.758C>G (p.P253R)	nonsynonymous SNV	0	0	rs77543610	ID=COSM1152152,COSM5575603,COSM915505,COSM49170,COSM915504;OCCURENCE=1(ovary),1(upper_aerodigestive_tract),1(stomach),5(endometrium),1(lung)	CLINSIG=pathogenic;CLNDBN=Acrocephalosyndactyly_type_I;CLNREVSTAT=no_assertion_criteria_provided;CLNACC=RCV000014193.23;CLNDSDB=GeneReviews:MedGen:OMIM:Orphanet:SNOMED_CT;CLNDSDBID=NBK1455:C0001193:101200:ORPHA87:205258009	27.6	Lib6_250_4G10	4G10	Yes	49	17795	0.095532	Yes	50	13351	0.277133	Yes	-	-	-	-	Yes	-	Amplicon	-	-	-	-
1	8	Positive	FGFR2	chr10	123279674	G	C	c.758C>G (p.P253R)	nonsynonymous SNV	0	0	rs77543610	ID=COSM1152152,COSM5575603,COSM915505,COSM49170,COSM915504;OCCURENCE=1(ovary),1(upper_aerodigestive_tract),1(stomach),5(endometrium),1(lung)	CLINSIG=pathogenic;CLNDBN=Acrocephalosyndactyly_type_I;CLNREVSTAT=no_assertion_criteria_provided;CLNACC=RCV000014193.23;CLNDSDB=GeneReviews:MedGen:OMIM:Orphanet:SNOMED_CT;CLNDSDBID=NBK1455:C0001193:101200:ORPHA87:205258009	27.6	Lib7_264_1D7	1D7	Yes	49	19593	0.214362	Yes	50	12735	0.478995	Yes	-	-	-	-	Yes	-	Amplicon	-	-	-	-
1	8	Positive	FGFR2	chr10	123279674	G	C	c.758C>G (p.P253R)	nonsynonymous SNV	0	0	rs77543610	ID=COSM1152152,COSM5575603,COSM915505,COSM49170,COSM915504;OCCURENCE=1(ovary),1(upper_aerodigestive_tract),1(stomach),5(endometrium),1(lung)	CLINSIG=pathogenic;CLNDBN=Acrocephalosyndactyly_type_I;CLNREVSTAT=no_assertion_criteria_provided;CLNACC=RCV000014193.23;CLNDSDB=GeneReviews:MedGen:OMIM:Orphanet:SNOMED_CT;CLNDSDBID=NBK1455:C0001193:101200:ORPHA87:205258009	27.6	Lib6_246_4G5	4G5	Yes	49	20823	0.273736	Yes	50	16179	0.346128	Yes	-	-	-	-	Yes	-	Amplicon	-	-	-	-
1	8	Positive	FGFR2	chr10	123279674	G	C	c.758C>G (p.P253R)	nonsynonymous SNV	0	0	rs77543610	ID=COSM1152152,COSM5575603,COSM915505,COSM49170,COSM915504;OCCURENCE=1(ovary),1(upper_aerodigestive_tract),1(stomach),5(endometrium),1(lung)	CLINSIG=pathogenic;CLNDBN=Acrocephalosyndactyly_type_I;CLNREVSTAT=no_assertion_criteria_provided;CLNACC=RCV000014193.23;CLNDSDB=GeneReviews:MedGen:OMIM:Orphanet:SNOMED_CT;CLNDSDBID=NBK1455:C0001193:101200:ORPHA87:205258009	27.6	Lib16_132_4F12	4F12	Yes	49	21496	0.34425	Yes	50	12691	0.472776	Yes	-	-	-	-	Yes	-	Amplicon	-	-	-	-
1	8	Positive	FGFR2	chr10	123279674	G	C	c.758C>G (p.P253R)	nonsynonymous SNV	0	0	rs77543610	ID=COSM1152152,COSM5575603,COSM915505,COSM49170,COSM915504;OCCURENCE=1(ovary),1(upper_aerodigestive_tract),1(stomach),5(endometrium),1(lung)	CLINSIG=pathogenic;CLNDBN=Acrocephalosyndactyly_type_I;CLNREVSTAT=no_assertion_criteria_provided;CLNACC=RCV000014193.23;CLNDSDB=GeneReviews:MedGen:OMIM:Orphanet:SNOMED_CT;CLNDSDBID=NBK1455:C0001193:101200:ORPHA87:205258009	27.6	Lib7_270_1D12B	1D12B	Yes	49	21933	0.113983	Yes	50	15300	0.183007	Yes	-	-	-	-	Yes	-	Amplicon	-	-	-	-
1	8	Positive	FGFR2	chr10	123279674	G	C	c.758C>G (p.P253R)	nonsynonymous SNV	0	0	rs77543610	ID=COSM1152152,COSM5575603,COSM915505,COSM49170,COSM915504;OCCURENCE=1(ovary),1(upper_aerodigestive_tract),1(stomach),5(endometrium),1(lung)	CLINSIG=pathogenic;CLNDBN=Acrocephalosyndactyly_type_I;CLNREVSTAT=no_assertion_criteria_provided;CLNACC=RCV000014193.23;CLNDSDB=GeneReviews:MedGen:OMIM:Orphanet:SNOMED_CT;CLNDSDBID=NBK1455:C0001193:101200:ORPHA87:205258009	27.6	Lib7_260_1D3	1D3	Yes	49	22519	0.106577	Yes	50	15021	0.233007	Yes	-	-	-	-	Yes	-	Amplicon	-	-	-	-
1	9	Positive	FGFR2	chr10	123279605	A	C	c.827T>G (p.F276C)	nonsynonymous SNV	0	0	0	ID=COSM1743352,COSM1743351,COSM1743353,COSM1743350;OCCURENCE=1(biliary_tract)	0	28.4	Lib1_147_4C7	4C7	Yes	48	22282	0.332107	Yes	49	26285	0.315769	Yes	50	20310	0.310192	Yes	Yes	-	Amplicon	-	-	-	-
1	10	Positive	FGFR2	chr10	123279566	T	G	c.866A>C (p.Q289P)	nonsynonymous SNV	0	0	rs121918497	0	CLINSIG=pathogenic|pathogenic;CLNDBN=Crouzon_syndrome|Jackson-Weiss_syndrome;CLNREVSTAT=no_assertion_criteria_provided|no_assertion_criteria_provided;CLNACC=RCV000014196.16|RCV000014197.23;CLNDSDB=GeneReviews:MedGen:OMIM:Orphanet:SNOMED_CT|GeneReviews:MedGen:OMIM:Orphanet;CLNDSDBID=NBK1455:C0010273:123500:ORPHA207:28861008|NBK1455:C0795998:123150:ORPHA1540	27.6	Lib16_127_4D27	4D27	Yes	48	24309	0.11107	Yes	49	21176	0.122781	Yes	-	-	-	-	Yes	-	Amplicon	-	-	-	-
1	11	Positive	FGFR2	chr10	123279562	C	A	c.870G>T (p.W290C)	nonsynonymous SNV	0	0	rs121918499	0	CLINSIG=pathogenic|pathogenic,pathogenic;CLNDBN=Pfeiffer_syndrome|Craniofacial-skeletal-dermatologic_dysplasia,Pfeiffer_syndrome;CLNREVSTAT=no_assertion_criteria_provided|no_assertion_criteria_provided,no_assertion_criteria_provided;CLNACC=RCV000014217.23|RCV000014218.23,RCV000014203.24;CLNDSDB=GeneReviews:MedGen:OMIM:Orphanet|MedGen,GeneReviews:MedGen:OMIM:Orphanet;CLNDSDBID=NBK1455:C1863356:101…	34	Lib1_153_4C15	4C15	Yes	48	9880	0.678138	Yes	49	17168	0.7048	Yes	-	-	-	-	Yes	-	Amplicon	-	-	-	-
1	11	Positive	FGFR2	chr10	123279562	C	A	c.870G>T (p.W290C)	nonsynonymous SNV	0	0	rs121918499	0	CLINSIG=pathogenic|pathogenic,pathogenic;CLNDBN=Pfeiffer_syndrome|Craniofacial-skeletal-dermatologic_dysplasia,Pfeiffer_syndrome;CLNREVSTAT=no_assertion_criteria_provided|no_assertion_criteria_provided,no_assertion_criteria_provided;CLNACC=RCV000014217.23|RCV000014218.23,RCV000014203.24;CLNDSDB=GeneReviews:MedGen:OMIM:Orphanet|MedGen,GeneReviews:MedGen:OMIM:Orphanet;CLNDSDBID=NBK1455:C1863356:101…	34	Lib4_205_4EE10	4EE10	Yes	48	14599	0.335639	Yes	49	21495	0.507095	Yes	-	-	-	-	Yes	-	Amplicon	-	-	-	-
1	11	Positive	FGFR2	chr10	123279562	C	A	c.870G>T (p.W290C)	nonsynonymous SNV	0	0	rs121918499	0	CLINSIG=pathogenic|pathogenic,pathogenic;CLNDBN=Pfeiffer_syndrome|Craniofacial-skeletal-dermatologic_dysplasia,Pfeiffer_syndrome;CLNREVSTAT=no_assertion_criteria_provided|no_assertion_criteria_provided,no_assertion_criteria_provided;CLNACC=RCV000014217.23|RCV000014218.23,RCV000014203.24;CLNDSDB=GeneReviews:MedGen:OMIM:Orphanet|MedGen,GeneReviews:MedGen:OMIM:Orphanet;CLNDSDBID=NBK1455:C1863356:101…	34	Lib7_259_1D2	1D2	Yes	48	24288	0.201746	Yes	49	19637	0.152773	Yes	-	-	-	-	Yes	-	Amplicon	-	-	-	-
1^	12	Positive	FGFR2	chr10	123279562	C	G	c.870G>C (p.W290C)	nonsynonymous SNV	0	0	rs121918499	ID=COSM4861712,COSM1146411,COSM41286,COSM683045,COSM683046;OCCURENCE=1(thymus),3(oesophagus),3(lung)	CLINSIG=pathogenic|pathogenic,pathogenic;CLNDBN=Pfeiffer_syndrome|Craniofacial-skeletal-dermatologic_dysplasia,Pfeiffer_syndrome;CLNREVSTAT=no_assertion_criteria_provided|no_assertion_criteria_provided,no_assertion_criteria_provided;CLNACC=RCV000014217.23|RCV000014218.23,RCV000014203.24;CLNDSDB=GeneReviews:MedGen:OMIM:Orphanet|MedGen,GeneReviews:MedGen:OMIM:Orphanet;CLNDSDBID=NBK1455:C1863356:101…	34	Lib1_160_4C22	4C22	Yes	48	13788	0.029011	No	49	19902	0.115566	Yes	-	-	-	-	No	-	Inferred-same event	-	-	-	-
1	12	Positive	FGFR2	chr10	123279562	C	G	c.870G>C (p.W290C)	nonsynonymous SNV	0	0	rs121918499	ID=COSM4861712,COSM1146411,COSM41286,COSM683045,COSM683046;OCCURENCE=1(thymus),3(oesophagus),3(lung)	CLINSIG=pathogenic|pathogenic,pathogenic;CLNDBN=Pfeiffer_syndrome|Craniofacial-skeletal-dermatologic_dysplasia,Pfeiffer_syndrome;CLNREVSTAT=no_assertion_criteria_provided|no_assertion_criteria_provided,no_assertion_criteria_provided;CLNACC=RCV000014217.23|RCV000014218.23,RCV000014203.24;CLNDSDB=GeneReviews:MedGen:OMIM:Orphanet|MedGen,GeneReviews:MedGen:OMIM:Orphanet;CLNDSDBID=NBK1455:C1863356:101…	34	Lib9_9_1D19	1D19	Yes	48	14155	0.374426	Yes	49	16623	0.300788	Yes	-	-	-	-	Yes	-	Amplicon	-	-	-	-
1	12	Positive	FGFR2	chr10	123279562	C	G	c.870G>C (p.W290C)	nonsynonymous SNV	0	0	rs121918499	ID=COSM4861712,COSM1146411,COSM41286,COSM683045,COSM683046;OCCURENCE=1(thymus),3(oesophagus),3(lung)	CLINSIG=pathogenic|pathogenic,pathogenic;CLNDBN=Pfeiffer_syndrome|Craniofacial-skeletal-dermatologic_dysplasia,Pfeiffer_syndrome;CLNREVSTAT=no_assertion_criteria_provided|no_assertion_criteria_provided,no_assertion_criteria_provided;CLNACC=RCV000014217.23|RCV000014218.23,RCV000014203.24;CLNDSDB=GeneReviews:MedGen:OMIM:Orphanet|MedGen,GeneReviews:MedGen:OMIM:Orphanet;CLNDSDBID=NBK1455:C1863356:101…	34	Lib9_2_1D14	1D14	Yes	48	20558	0.267536	Yes	49	21964	0.277727	Yes	-	-	-	-	Yes	-	Amplicon	-	-	-	-
1	13	Positive	FGFR2	chr10	123274803	G	C	c.1115C>G (p.S372C)	nonsynonymous SNV	0	0	rs121913477	ID=COSM36905;OCCURENCE=1(endometrium)	CLINSIG=pathogenic;CLNDBN=Cutis_Gyrata_syndrome_of_Beare_and_Stevenson;CLNREVSTAT=no_assertion_criteria_provided;CLNACC=RCV000014200.23;CLNDSDB=GeneReviews:MedGen:OMIM:Orphanet;CLNDSDBID=NBK1455:C1852406:123790:ORPHA1555	25.5	Lib16_135_4D13R	4D13R	No	44	28557	0.25	Yes	-	-	-	-	-	-	-	-	-	Yes	Replicate	-	-	-	-
1	13	Positive	FGFR2	chr10	123274803	G	C	c.1115C>G (p.S372C)	nonsynonymous SNV	0	0	rs121913477	ID=COSM36905;OCCURENCE=1(endometrium)	CLINSIG=pathogenic;CLNDBN=Cutis_Gyrata_syndrome_of_Beare_and_Stevenson;CLNREVSTAT=no_assertion_criteria_provided;CLNACC=RCV000014200.23;CLNDSDB=GeneReviews:MedGen:OMIM:Orphanet;CLNDSDBID=NBK1455:C1852406:123790:ORPHA1555	25.5	Lib2_177_4D13	4D13	No	44	33864	0.41	Yes	-	-	-	-	-	-	-	-	-	Yes	Replicate	-	-	-	-
1^	13	Positive	FGFR2	chr10	123274803	G	C	c.1115C>G (p.S372C)	nonsynonymous SNV	0	0	rs121913477	ID=COSM36905;OCCURENCE=1(endometrium)	CLINSIG=pathogenic;CLNDBN=Cutis_Gyrata_syndrome_of_Beare_and_Stevenson;CLNREVSTAT=no_assertion_criteria_provided;CLNACC=RCV000014200.23;CLNDSDB=GeneReviews:MedGen:OMIM:Orphanet;CLNDSDBID=NBK1455:C1852406:123790:ORPHA1555	25.5	Lib5_225_4F14	4F14	No	44	11129	0.11	Yes	-	-	-	-	-	-	-	-	-	-	Inferred-same event	-	-	-	-
1^	13	Positive	FGFR2	chr10	123274803	G	C	c.1115C>G (p.S372C)	nonsynonymous SNV	0	0	rs121913477	ID=COSM36905;OCCURENCE=1(endometrium)	CLINSIG=pathogenic;CLNDBN=Cutis_Gyrata_syndrome_of_Beare_and_Stevenson;CLNREVSTAT=no_assertion_criteria_provided;CLNACC=RCV000014200.23;CLNDSDB=GeneReviews:MedGen:OMIM:Orphanet;CLNDSDBID=NBK1455:C1852406:123790:ORPHA1555	25.5	Lib2_170_4D5	4D5	No	44	28761	0.22	Yes	-	-	-	-	-	-	-	-	-	-	Inferred-same event	-	-	-	-
1^	13	Positive	FGFR2	chr10	123274803	G	C	c.1115C>G (p.S372C)	nonsynonymous SNV	0	0	rs121913477	ID=COSM36905;OCCURENCE=1(endometrium)	CLINSIG=pathogenic;CLNDBN=Cutis_Gyrata_syndrome_of_Beare_and_Stevenson;CLNREVSTAT=no_assertion_criteria_provided;CLNACC=RCV000014200.23;CLNDSDB=GeneReviews:MedGen:OMIM:Orphanet;CLNDSDBID=NBK1455:C1852406:123790:ORPHA1555	25.5	Lib2_167_4D1	4D1	No	44	30063	0.2	Yes	-	-	-	-	-	-	-	-	-	-	Inferred-same event	-	-	-	-
1^	13	Positive	FGFR2	chr10	123274803	G	C	c.1115C>G (p.S372C)	nonsynonymous SNV	0	0	rs121913477	ID=COSM36905;OCCURENCE=1(endometrium)	CLINSIG=pathogenic;CLNDBN=Cutis_Gyrata_syndrome_of_Beare_and_Stevenson;CLNREVSTAT=no_assertion_criteria_provided;CLNACC=RCV000014200.23;CLNDSDB=GeneReviews:MedGen:OMIM:Orphanet;CLNDSDBID=NBK1455:C1852406:123790:ORPHA1555	25.5	Lib2_171_4D7	4D7	No	44	31883	0.18	Yes	-	-	-	-	-	-	-	-	-	-	Inferred-same event	-	-	-	-
1	14	Positive	FGFR3	chr4	1805519	C	T	c.1031C>T (p.S344F)	nonsynonymous SNV	4.065e-06	3.231e-05	rs199702395	ID=COSM5576122;OCCURENCE=1(stomach)	CLINSIG=untested;CLNDBN=not_specified;CLNREVSTAT=no_assertion_provided;CLNACC=RCV000121077.1;CLNDSDB=MedGen;CLNDSDBID=CN169374	17.97	Lib6_243_4G2	4G2	Yes	341	18803	0.234005	Yes	342	19614	0.188641	Yes	-	-	-	-	Yes	-	Amplicon	-	-	-	-
1^	15	Positive	FGFR3	chr4	1807371	C	A	c.1620C>A (p.N540K)	nonsynonymous SNV	0	0	rs28933068	0	CLINSIG=pathogenic|pathogenic,pathogenic;CLNDBN=Hypochondroplasia|Thanatophoric_dysplasia_type_1,Hypochondroplasia;CLNREVSTAT=no_assertion_criteria_provided|no_assertion_criteria_provided,no_assertion_criteria_provided;CLNACC=RCV000017740.27|RCV000017771.22,RCV000017741.27;CLNDSDB=GeneReviews:MedGen:OMIM:Orphanet:SNOMED_CT|GeneReviews:MedGen:OMIM:Orphanet:Orphanet,GeneReviews:MedGen:OMIM:Orphanet…	27.8	Lib10_28_2F27	2F27	Yes	349	23189	0.068998	Yes	350	9757	0.061494	No	-	-	-	-	No	-	Inferred-same event	-	-	-	-
1	15	Positive	FGFR3	chr4	1807371	C	A	c.1620C>A (p.N540K)	nonsynonymous SNV	0	0	rs28933068	0	CLINSIG=pathogenic|pathogenic,pathogenic;CLNDBN=Hypochondroplasia|Thanatophoric_dysplasia_type_1,Hypochondroplasia;CLNREVSTAT=no_assertion_criteria_provided|no_assertion_criteria_provided,no_assertion_criteria_provided;CLNACC=RCV000017740.27|RCV000017771.22,RCV000017741.27;CLNDSDB=GeneReviews:MedGen:OMIM:Orphanet:SNOMED_CT|GeneReviews:MedGen:OMIM:Orphanet:Orphanet,GeneReviews:MedGen:OMIM:Orphanet…	27.8	Lib14_104_4C6	4C6	Yes	349	34770	0.201323	Yes	350	15017	0.15316	Yes	-	-	-	-	Yes	-	Amplicon	-	-	-	-
1	16	Positive	FGFR3	chr4	1807371	C	G	c.1620C>G (p.N540K)	nonsynonymous SNV	0	0	rs28933068	0	CLINSIG=pathogenic|pathogenic,pathogenic;CLNDBN=Hypochondroplasia|Thanatophoric_dysplasia_type_1,Hypochondroplasia;CLNREVSTAT=no_assertion_criteria_provided|no_assertion_criteria_provided,no_assertion_criteria_provided;CLNACC=RCV000017740.27|RCV000017771.22,RCV000017741.27;CLNDSDB=GeneReviews:MedGen:OMIM:Orphanet:SNOMED_CT|GeneReviews:MedGen:OMIM:Orphanet:Orphanet,GeneReviews:MedGen:OMIM:Orphanet…	26.3	Lib8_273_2F20	2F20	Yes	349	31416	0.04138	Yes	350	15748	0.0889	Yes	-	-	-	-	Yes	-	Amplicon	-	-	-	-
1	17	Positive	FGFR3	chr4	1807488	G	A	c.1657G>A (p.V553M)	nonsynonymous SNV	0.0001	0.0004	rs199544087	0	0	28.5	Lib7_269_1D12A	1D12A	Yes	350	14469	0.41468	Yes	351	21604	0.319385	Yes	-	-	-	-	Yes	-	PCR	0.297974	5034	-	-
1^	18	Positive	KRAS	chr12	25398284	C	G	c.35G>C (p.G12A)	nonsynonymous SNV	0	0	rs121913529	ID=COSM1140134,COSM522;OCCURENCE=26(stomach),16(small_intestine),6(thyroid),3(upper_aerodigestive_tract),7(urinary_tract),68(endometrium),2(testis),52(haematopoietic_and_lymphoid_tissue),45(ovary),2(breast),5(soft_tissue),1(skin),33(biliary_tract),1(peritoneum),2(thymus),1(bone),2(NS),4(gastrointestinal_tract_(site_indeterminate)),1(liver),4(cervix),83(pancreas),5(central_nervous_system),2(prosta…	CLINSIG=pathogenic|pathogenic|pathogenic|pathogenic|pathogenic,pathogenic,pathogenic|pathogenic|pathogenic|pathogenic|pathogenic|pathogenic|pathogenic|pathogenic|pathogenic;CLNDBN=Carcinoma_of_pancreas|Nevus_sebaceous|Juvenile_myelomonocytic_leukemia|Non-small_cell_lung_cancer|Rasopathy,Non-small_cell_lung_cancer,Carcinoma_of_pancreas|Neoplasm_of_stomach|Epidermal_nevus|Nevus_sebaceous|Epidermal_…	27.2	Lib10_22_2F2	2F2	Yes	174	16577	0	No	175	10338	0.116077	Yes	-	-	-	-	No	-	Inferred-same variant	-	-	-	-
1^	18	Positive	KRAS	chr12	25398284	C	G	c.35G>C (p.G12A)	nonsynonymous SNV	0	0	rs121913529	ID=COSM1140134,COSM522;OCCURENCE=26(stomach),16(small_intestine),6(thyroid),3(upper_aerodigestive_tract),7(urinary_tract),68(endometrium),2(testis),52(haematopoietic_and_lymphoid_tissue),45(ovary),2(breast),5(soft_tissue),1(skin),33(biliary_tract),1(peritoneum),2(thymus),1(bone),2(NS),4(gastrointestinal_tract_(site_indeterminate)),1(liver),4(cervix),83(pancreas),5(central_nervous_system),2(prosta…	CLINSIG=pathogenic|pathogenic|pathogenic|pathogenic|pathogenic,pathogenic,pathogenic|pathogenic|pathogenic|pathogenic|pathogenic|pathogenic|pathogenic|pathogenic|pathogenic;CLNDBN=Carcinoma_of_pancreas|Nevus_sebaceous|Juvenile_myelomonocytic_leukemia|Non-small_cell_lung_cancer|Rasopathy,Non-small_cell_lung_cancer,Carcinoma_of_pancreas|Neoplasm_of_stomach|Epidermal_nevus|Nevus_sebaceous|Epidermal_…	27.2	Lib1_162_4C24	4C24	Yes	174	10454	0.181749	Yes	175	4056	0	No	-	-	-	-	No	-	Inferred-same variant	-	-	-	-
1	18	Positive	KRAS	chr12	25398284	C	G	c.35G>C (p.G12A)	nonsynonymous SNV	0	0	rs121913529	ID=COSM1140134,COSM522;OCCURENCE=26(stomach),16(small_intestine),6(thyroid),3(upper_aerodigestive_tract),7(urinary_tract),68(endometrium),2(testis),52(haematopoietic_and_lymphoid_tissue),45(ovary),2(breast),5(soft_tissue),1(skin),33(biliary_tract),1(peritoneum),2(thymus),1(bone),2(NS),4(gastrointestinal_tract_(site_indeterminate)),1(liver),4(cervix),83(pancreas),5(central_nervous_system),2(prosta…	CLINSIG=pathogenic|pathogenic|pathogenic|pathogenic|pathogenic,pathogenic,pathogenic|pathogenic|pathogenic|pathogenic|pathogenic|pathogenic|pathogenic|pathogenic|pathogenic;CLNDBN=Carcinoma_of_pancreas|Nevus_sebaceous|Juvenile_myelomonocytic_leukemia|Non-small_cell_lung_cancer|Rasopathy,Non-small_cell_lung_cancer,Carcinoma_of_pancreas|Neoplasm_of_stomach|Epidermal_nevus|Nevus_sebaceous|Epidermal_…	27.2	Lib9_15_1D25	1D25	Yes	174	14140	0.424328	Yes	175	9626	0.311656	Yes	-	-	-	-	Yes	-	smMIP	-	-	0.375	800
1^	19	Positive	KRAS	chr12	25398284	C	T	c.35G>A (p.G12D)	nonsynonymous SNV	4.094e-06	0	rs121913529	ID=COSM521,COSM1135366;OCCURENCE=1257(lung),8210(large_intestine),1(genital_tract),15(oesophagus),2974(pancreas),6(central_nervous_system),3(eye),22(prostate),20(gastrointestinal_tract_(site_indeterminate)),18(liver),23(cervix),1(salivary_gland),31(skin),350(biliary_tract),95(peritoneum),17(NS),215(haematopoietic_and_lymphoid_tissue),313(ovary),23(breast),23(soft_tissue),23(urinary_tract),3(kidne…	CLINSIG=pathogenic|pathogenic|pathogenic|pathogenic|pathogenic,pathogenic,pathogenic|pathogenic|pathogenic|pathogenic|pathogenic|pathogenic|pathogenic|pathogenic|pathogenic;CLNDBN=Carcinoma_of_pancreas|Nevus_sebaceous|Juvenile_myelomonocytic_leukemia|Non-small_cell_lung_cancer|Rasopathy,Non-small_cell_lung_cancer,Carcinoma_of_pancreas|Neoplasm_of_stomach|Epidermal_nevus|Nevus_sebaceous|Epidermal_…	25.3	Lib3_196_4D36	4D36	Yes	174	15653	0.268319	Yes	175	3178	0.031466	No	-	-	-	-	No	-	Inferred-same event	-	-	-	-
1^	19	Positive	KRAS	chr12	25398284	C	T	c.35G>A (p.G12D)	nonsynonymous SNV	4.094e-06	0	rs121913529	ID=COSM521,COSM1135366;OCCURENCE=1257(lung),8210(large_intestine),1(genital_tract),15(oesophagus),2974(pancreas),6(central_nervous_system),3(eye),22(prostate),20(gastrointestinal_tract_(site_indeterminate)),18(liver),23(cervix),1(salivary_gland),31(skin),350(biliary_tract),95(peritoneum),17(NS),215(haematopoietic_and_lymphoid_tissue),313(ovary),23(breast),23(soft_tissue),23(urinary_tract),3(kidne…	CLINSIG=pathogenic|pathogenic|pathogenic|pathogenic|pathogenic,pathogenic,pathogenic|pathogenic|pathogenic|pathogenic|pathogenic|pathogenic|pathogenic|pathogenic|pathogenic;CLNDBN=Carcinoma_of_pancreas|Nevus_sebaceous|Juvenile_myelomonocytic_leukemia|Non-small_cell_lung_cancer|Rasopathy,Non-small_cell_lung_cancer,Carcinoma_of_pancreas|Neoplasm_of_stomach|Epidermal_nevus|Nevus_sebaceous|Epidermal_…	25.3	Lib13_86_4B6	4B6	Yes	174	17626	0.255305	Yes	175	11084	0.27066	No	-	-	-	-	No	-	Inferred-same event	-	-	-	-
1^	19	Positive	KRAS	chr12	25398284	C	T	c.35G>A (p.G12D)	nonsynonymous SNV	4.094e-06	0	rs121913529	ID=COSM521,COSM1135366;OCCURENCE=1257(lung),8210(large_intestine),1(genital_tract),15(oesophagus),2974(pancreas),6(central_nervous_system),3(eye),22(prostate),20(gastrointestinal_tract_(site_indeterminate)),18(liver),23(cervix),1(salivary_gland),31(skin),350(biliary_tract),95(peritoneum),17(NS),215(haematopoietic_and_lymphoid_tissue),313(ovary),23(breast),23(soft_tissue),23(urinary_tract),3(kidne…	CLINSIG=pathogenic|pathogenic|pathogenic|pathogenic|pathogenic,pathogenic,pathogenic|pathogenic|pathogenic|pathogenic|pathogenic|pathogenic|pathogenic|pathogenic|pathogenic;CLNDBN=Carcinoma_of_pancreas|Nevus_sebaceous|Juvenile_myelomonocytic_leukemia|Non-small_cell_lung_cancer|Rasopathy,Non-small_cell_lung_cancer,Carcinoma_of_pancreas|Neoplasm_of_stomach|Epidermal_nevus|Nevus_sebaceous|Epidermal_…	25.3	Lib5_220_4EE25	4EE25	Yes	174	19962	0.285543	Yes	175	3080	0.292208	No	-	-	-	-	No	-	Inferred-same event	-	-	-	-
1	19	Positive	KRAS	chr12	25398284	C	T	c.35G>A (p.G12D)	nonsynonymous SNV	4.094e-06	0	rs121913529	ID=COSM521,COSM1135366;OCCURENCE=1257(lung),8210(large_intestine),1(genital_tract),15(oesophagus),2974(pancreas),6(central_nervous_system),3(eye),22(prostate),20(gastrointestinal_tract_(site_indeterminate)),18(liver),23(cervix),1(salivary_gland),31(skin),350(biliary_tract),95(peritoneum),17(NS),215(haematopoietic_and_lymphoid_tissue),313(ovary),23(breast),23(soft_tissue),23(urinary_tract),3(kidne…	CLINSIG=pathogenic|pathogenic|pathogenic|pathogenic|pathogenic,pathogenic,pathogenic|pathogenic|pathogenic|pathogenic|pathogenic|pathogenic|pathogenic|pathogenic|pathogenic;CLNDBN=Carcinoma_of_pancreas|Nevus_sebaceous|Juvenile_myelomonocytic_leukemia|Non-small_cell_lung_cancer|Rasopathy,Non-small_cell_lung_cancer,Carcinoma_of_pancreas|Neoplasm_of_stomach|Epidermal_nevus|Nevus_sebaceous|Epidermal_…	25.3	Lib13_87_4B7	4B7	Yes	174	13740	2.21252	Yes	175	6860	1.42857	Yes	-	-	-	-	Yes	-	Amplicon/Inferred-same event	-	-	-	-
1	19	Positive	KRAS	chr12	25398284	C	T	c.35G>A (p.G12D)	nonsynonymous SNV	4.094e-06	0	rs121913529	ID=COSM521,COSM1135366;OCCURENCE=1257(lung),8210(large_intestine),1(genital_tract),15(oesophagus),2974(pancreas),6(central_nervous_system),3(eye),22(prostate),20(gastrointestinal_tract_(site_indeterminate)),18(liver),23(cervix),1(salivary_gland),31(skin),350(biliary_tract),95(peritoneum),17(NS),215(haematopoietic_and_lymphoid_tissue),313(ovary),23(breast),23(soft_tissue),23(urinary_tract),3(kidne…	CLINSIG=pathogenic|pathogenic|pathogenic|pathogenic|pathogenic,pathogenic,pathogenic|pathogenic|pathogenic|pathogenic|pathogenic|pathogenic|pathogenic|pathogenic|pathogenic;CLNDBN=Carcinoma_of_pancreas|Nevus_sebaceous|Juvenile_myelomonocytic_leukemia|Non-small_cell_lung_cancer|Rasopathy,Non-small_cell_lung_cancer,Carcinoma_of_pancreas|Neoplasm_of_stomach|Epidermal_nevus|Nevus_sebaceous|Epidermal_…	25.3	Lib14_99_4B4	4B4	Yes	174	14717	0.74064	Yes	175	7120	1.15169	Yes	-	-	-	-	Yes	-	smMIP	-	-	0.664137	1054
1	19	Positive	KRAS	chr12	25398284	C	T	c.35G>A (p.G12D)	nonsynonymous SNV	4.094e-06	0	rs121913529	ID=COSM521,COSM1135366;OCCURENCE=1257(lung),8210(large_intestine),1(genital_tract),15(oesophagus),2974(pancreas),6(central_nervous_system),3(eye),22(prostate),20(gastrointestinal_tract_(site_indeterminate)),18(liver),23(cervix),1(salivary_gland),31(skin),350(biliary_tract),95(peritoneum),17(NS),215(haematopoietic_and_lymphoid_tissue),313(ovary),23(breast),23(soft_tissue),23(urinary_tract),3(kidne…	CLINSIG=pathogenic|pathogenic|pathogenic|pathogenic|pathogenic,pathogenic,pathogenic|pathogenic|pathogenic|pathogenic|pathogenic|pathogenic|pathogenic|pathogenic|pathogenic;CLNDBN=Carcinoma_of_pancreas|Nevus_sebaceous|Juvenile_myelomonocytic_leukemia|Non-small_cell_lung_cancer|Rasopathy,Non-small_cell_lung_cancer,Carcinoma_of_pancreas|Neoplasm_of_stomach|Epidermal_nevus|Nevus_sebaceous|Epidermal_…	25.3	Lib14_101_4B12	4B12	Yes	174	17847	0.526699	Yes	175	9966	0.782661	Yes	-	-	-	-	Yes	-	Amplicon/Inferred-same event	-	-	-	-
1	20	Positive	KRAS	chr12	25380282	G	C	c.176C>G (p.A59G)	nonsynonymous SNV	0	0	0	ID=COSM1135365,COSM28518;OCCURENCE=1(kidney),3(haematopoietic_and_lymphoid_tissue),1(ovary),1(breast),2(large_intestine)	0	24.2	Lib14_99_4B4	4B4	Yes	172	7590	0.30303	Yes	173	14073	0.277126	Yes	-	-	-	-	Yes	-	smMIP	-	-	0.342466	1168
1^	21	Positive	KRAS	chr12	25380282	G	T	c.176C>A (p.A59E)	nonsynonymous SNV	0	0	0	ID=COSM1318029,COSM547;OCCURENCE=1(endometrium),2(haematopoietic_and_lymphoid_tissue),3(large_intestine)	0	29.6	Lib15_124_4D14	4D14	Yes	172	8886	0.112537	No	173	12900	0.139535	Yes	-	-	-	-	No	-	Inferred-same event	-	-	-	-
1	21	Positive	KRAS	chr12	25380282	G	T	c.176C>A (p.A59E)	nonsynonymous SNV	0	0	0	ID=COSM1318029,COSM547;OCCURENCE=1(endometrium),2(haematopoietic_and_lymphoid_tissue),3(large_intestine)	0	29.6	Lib4_210_4EE15	4EE15	Yes	172	10699	0.67296	Yes	173	27850	0.319569	Yes	-	-	-	-	Yes	-	smMIP	-	-	0.452489	1768
1^	22	Positive	KRAS	chr12	25380276	T	C	c.182A>G (p.Q61R)	nonsynonymous SNV	0	0	rs121913240	ID=COSM1158660,COSM552;OCCURENCE=8(haematopoietic_and_lymphoid_tissue),2(biliary_tract),3(skin),3(stomach),27(thyroid),1(upper_aerodigestive_tract),3(genital_tract),29(large_intestine),10(lung),1(cervix),1(prostate),26(pancreas),1(central_nervous_system)	CLINSIG=pathogenic,pathogenic;CLNDBN=Non-small_cell_lung_cancer,Noonan_syndrome_3;CLNREVSTAT=criteria_provided\x2c_single_submitter,criteria_provided\x2c_single_submitter;CLNACC=RCV000038258.2,RCV000038257.2;CLNDSDB=MedGen:SNOMED_CT,GeneReviews:MedGen:OMIM:Orphanet;CLNDSDBID=C0007131:254637007,NBK1124:C1860991:609942:ORPHA648	23.2	Lib3_191_4D31	4D31	Yes	172	1555	0.450161	No	173	22428	1.07901	Yes	-	-	-	-	NA - low coverage	-	Inferred-same variant	-	-	-	-
1^	22	Positive	KRAS	chr12	25380276	T	C	c.182A>G (p.Q61R)	nonsynonymous SNV	0	0	rs121913240	ID=COSM1158660,COSM552;OCCURENCE=8(haematopoietic_and_lymphoid_tissue),2(biliary_tract),3(skin),3(stomach),27(thyroid),1(upper_aerodigestive_tract),3(genital_tract),29(large_intestine),10(lung),1(cervix),1(prostate),26(pancreas),1(central_nervous_system)	CLINSIG=pathogenic,pathogenic;CLNDBN=Non-small_cell_lung_cancer,Noonan_syndrome_3;CLNREVSTAT=criteria_provided\x2c_single_submitter,criteria_provided\x2c_single_submitter;CLNACC=RCV000038258.2,RCV000038257.2;CLNDSDB=MedGen:SNOMED_CT,GeneReviews:MedGen:OMIM:Orphanet;CLNDSDBID=C0007131:254637007,NBK1124:C1860991:609942:ORPHA648	23.2	Lib3_196_4D36	4D36	Yes	172	3946	0.633553	No	173	22733	0.703823	Yes	-	-	-	-	NA - low coverage	-	PCR	0.1735	18227.5	-	-
1^	22	Positive	KRAS	chr12	25380276	T	C	c.182A>G (p.Q61R)	nonsynonymous SNV	0	0	rs121913240	ID=COSM1158660,COSM552;OCCURENCE=8(haematopoietic_and_lymphoid_tissue),2(biliary_tract),3(skin),3(stomach),27(thyroid),1(upper_aerodigestive_tract),3(genital_tract),29(large_intestine),10(lung),1(cervix),1(prostate),26(pancreas),1(central_nervous_system)	CLINSIG=pathogenic,pathogenic;CLNDBN=Non-small_cell_lung_cancer,Noonan_syndrome_3;CLNREVSTAT=criteria_provided\x2c_single_submitter,criteria_provided\x2c_single_submitter;CLNACC=RCV000038258.2,RCV000038257.2;CLNDSDB=MedGen:SNOMED_CT,GeneReviews:MedGen:OMIM:Orphanet;CLNDSDBID=C0007131:254637007,NBK1124:C1860991:609942:ORPHA648	23.2	Lib5_220_4EE25	4EE25	Yes	172	4291	0.466092	No	173	28346	0.804346	Yes	-	-	-	-	NA - low coverage	-	Inferred-same variant	-	-	-	-
1^	22	Positive	KRAS	chr12	25380276	T	C	c.182A>G (p.Q61R)	nonsynonymous SNV	0	0	rs121913240	ID=COSM1158660,COSM552;OCCURENCE=8(haematopoietic_and_lymphoid_tissue),2(biliary_tract),3(skin),3(stomach),27(thyroid),1(upper_aerodigestive_tract),3(genital_tract),29(large_intestine),10(lung),1(cervix),1(prostate),26(pancreas),1(central_nervous_system)	CLINSIG=pathogenic,pathogenic;CLNDBN=Non-small_cell_lung_cancer,Noonan_syndrome_3;CLNREVSTAT=criteria_provided\x2c_single_submitter,criteria_provided\x2c_single_submitter;CLNACC=RCV000038258.2,RCV000038257.2;CLNDSDB=MedGen:SNOMED_CT,GeneReviews:MedGen:OMIM:Orphanet;CLNDSDBID=C0007131:254637007,NBK1124:C1860991:609942:ORPHA648	23.2	Lib1_161_4C23	4C23	Yes	172	4322	0.485886	No	173	17401	0.775817	Yes	-	-	-	-	NA - low coverage	-	PCR	0.689	19882.5	-	-
1^	22	Positive	KRAS	chr12	25380276	T	C	c.182A>G (p.Q61R)	nonsynonymous SNV	0	0	rs121913240	ID=COSM1158660,COSM552;OCCURENCE=8(haematopoietic_and_lymphoid_tissue),2(biliary_tract),3(skin),3(stomach),27(thyroid),1(upper_aerodigestive_tract),3(genital_tract),29(large_intestine),10(lung),1(cervix),1(prostate),26(pancreas),1(central_nervous_system)	CLINSIG=pathogenic,pathogenic;CLNDBN=Non-small_cell_lung_cancer,Noonan_syndrome_3;CLNREVSTAT=criteria_provided\x2c_single_submitter,criteria_provided\x2c_single_submitter;CLNACC=RCV000038258.2,RCV000038257.2;CLNDSDB=MedGen:SNOMED_CT,GeneReviews:MedGen:OMIM:Orphanet;CLNDSDBID=C0007131:254637007,NBK1124:C1860991:609942:ORPHA648	23.2	Lib5_217_4EE22	4EE22	Yes	172	4900	0.44898	No	173	24275	0.622039	Yes	-	-	-	-	NA - low coverage	-	Inferred-same variant	-	-	-	-
1^	22	Positive	KRAS	chr12	25380276	T	C	c.182A>G (p.Q61R)	nonsynonymous SNV	0	0	rs121913240	ID=COSM1158660,COSM552;OCCURENCE=8(haematopoietic_and_lymphoid_tissue),2(biliary_tract),3(skin),3(stomach),27(thyroid),1(upper_aerodigestive_tract),3(genital_tract),29(large_intestine),10(lung),1(cervix),1(prostate),26(pancreas),1(central_nervous_system)	CLINSIG=pathogenic,pathogenic;CLNDBN=Non-small_cell_lung_cancer,Noonan_syndrome_3;CLNREVSTAT=criteria_provided\x2c_single_submitter,criteria_provided\x2c_single_submitter;CLNACC=RCV000038258.2,RCV000038257.2;CLNDSDB=MedGen:SNOMED_CT,GeneReviews:MedGen:OMIM:Orphanet;CLNDSDBID=C0007131:254637007,NBK1124:C1860991:609942:ORPHA648	23.2	Lib4_213_4EE18	4EE18	Yes	172	7337	0.381627	No	173	19473	0.631644	Yes	-	-	-	-	No	-	Inferred-same variant	-	-	-	-
1	22	Positive	KRAS	chr12	25380276	T	C	c.182A>G (p.Q61R)	nonsynonymous SNV	0	0	rs121913240	ID=COSM1158660,COSM552;OCCURENCE=8(haematopoietic_and_lymphoid_tissue),2(biliary_tract),3(skin),3(stomach),27(thyroid),1(upper_aerodigestive_tract),3(genital_tract),29(large_intestine),10(lung),1(cervix),1(prostate),26(pancreas),1(central_nervous_system)	CLINSIG=pathogenic,pathogenic;CLNDBN=Non-small_cell_lung_cancer,Noonan_syndrome_3;CLNREVSTAT=criteria_provided\x2c_single_submitter,criteria_provided\x2c_single_submitter;CLNACC=RCV000038258.2,RCV000038257.2;CLNDSDB=MedGen:SNOMED_CT,GeneReviews:MedGen:OMIM:Orphanet;CLNDSDBID=C0007131:254637007,NBK1124:C1860991:609942:ORPHA648	23.2	Lib6_236_4F23	4F23	Yes	172	9498	1.0318	Yes	173	14238	0.653182	Yes	-	-	-	-	Yes	-	Inferred-same event	-	-	-	-
1	22	Positive	KRAS	chr12	25380276	T	C	c.182A>G (p.Q61R)	nonsynonymous SNV	0	0	rs121913240	ID=COSM1158660,COSM552;OCCURENCE=8(haematopoietic_and_lymphoid_tissue),2(biliary_tract),3(skin),3(stomach),27(thyroid),1(upper_aerodigestive_tract),3(genital_tract),29(large_intestine),10(lung),1(cervix),1(prostate),26(pancreas),1(central_nervous_system)	CLINSIG=pathogenic,pathogenic;CLNDBN=Non-small_cell_lung_cancer,Noonan_syndrome_3;CLNREVSTAT=criteria_provided\x2c_single_submitter,criteria_provided\x2c_single_submitter;CLNACC=RCV000038258.2,RCV000038257.2;CLNDSDB=MedGen:SNOMED_CT,GeneReviews:MedGen:OMIM:Orphanet;CLNDSDBID=C0007131:254637007,NBK1124:C1860991:609942:ORPHA648	23.2	Lib6_242_4G1	4G1	Yes	172	10051	2.51716	Yes	173	15856	2.74975	Yes	-	-	-	-	Yes	-	PCR	2.995	18861.5	-	-
1	22	Positive	KRAS	chr12	25380276	T	C	c.182A>G (p.Q61R)	nonsynonymous SNV	0	0	rs121913240	ID=COSM1158660,COSM552;OCCURENCE=8(haematopoietic_and_lymphoid_tissue),2(biliary_tract),3(skin),3(stomach),27(thyroid),1(upper_aerodigestive_tract),3(genital_tract),29(large_intestine),10(lung),1(cervix),1(prostate),26(pancreas),1(central_nervous_system)	CLINSIG=pathogenic,pathogenic;CLNDBN=Non-small_cell_lung_cancer,Noonan_syndrome_3;CLNREVSTAT=criteria_provided\x2c_single_submitter,criteria_provided\x2c_single_submitter;CLNACC=RCV000038258.2,RCV000038257.2;CLNDSDB=MedGen:SNOMED_CT,GeneReviews:MedGen:OMIM:Orphanet;CLNDSDBID=C0007131:254637007,NBK1124:C1860991:609942:ORPHA648	23.2	Lib6_240_4F27	4F27	Yes	172	11191	2.30542	Yes	173	18778	2.85973	Yes	-	-	-	-	Yes	-	Amplicon	-	-	-	-
1	23	Positive	MAP2K1	chr15	66727455	G	C	c.171G>C (p.K57N)	nonsynonymous SNV	0	0	0	ID=COSM5520914;OCCURENCE=1(biliary_tract)	0	26.5	Lib14_99_4B4	4B4	Yes	189	25713	0.159452	Yes	190	11088	0.117244	Yes	-	-	-	-	Yes	-	PCR	0.0364929	106870	-	-
1	24	Positive	PTPN11	chr12	112888197	T	G	c.213T>G (p.F71L)	nonsynonymous SNV	0	0	0	ID=COSM13024;OCCURENCE=1(haematopoietic_and_lymphoid_tissue)	0	26.5	Lib3_188_4D28	4D28	Yes	148	19464	0.313399	Yes	149	21543	0.241378	No	-	-	-	-	No	Yes	Replicate	-	-	-	-
1	24	Positive	PTPN11	chr12	112888197	T	G	c.213T>G (p.F71L)	nonsynonymous SNV	0	0	0	ID=COSM13024;OCCURENCE=1(haematopoietic_and_lymphoid_tissue)	0	26.5	Lib16_136_4D28R	4D28R	Yes	148	26058	0.652391	Yes	149	26931	0.315621	No	-	-	-	-	No	Yes	Replicate	-	-	-	-
1	25	Positive	PTPN11	chr12	112888198	G	C	c.214G>C (p.A72P)	nonsynonymous SNV	0	0	0	0	CLINSIG=unknown,pathogenic|probable-pathogenic,pathogenic|pathogenic|pathogenic;CLNDBN=not_specified,Rasopathy|Noonan_syndrome_1,Noonan_syndrome_1|Rasopathy|Noonan's_syndrome;CLNREVSTAT=criteria_provided\x2c_single_submitter,criteria_provided\x2c_single_submitter|criteria_provided\x2c_single_submitter,criteria_provided\x2c_single_submitter|criteria_provided\x2c_single_submitter|no_assertion_crite…	27.3	Lib10_27_2F26	2F26	Yes	148	16971	0.135525	Yes	149	17076	0.421644	Yes	-	-	-	-	Yes	-	PCR	0.245173	124782	-	-
1	26	Positive	PTPN11	chr12	112888199	C	A	c.215C>A (p.A72D)	nonsynonymous SNV	0	0	0	ID=COSM13035;OCCURENCE=1(autonomic_ganglia),8(haematopoietic_and_lymphoid_tissue),2(central_nervous_system)	0	32	Lib8_283_2F11	2F11	Yes	148	24374	0.110774	Yes	149	25123	0.139315	Yes	-	-	-	-	Yes	-	Amplicon	-	-	-	-
1	26	Positive	PTPN11	chr12	112888199	C	A	c.215C>A (p.A72D)	nonsynonymous SNV	0	0	0	ID=COSM13035;OCCURENCE=1(autonomic_ganglia),8(haematopoietic_and_lymphoid_tissue),2(central_nervous_system)	0	32	Lib8_274_2F21	2F21	Yes	148	27296	0.150205	Yes	149	26821	0.111853	Yes	-	-	-	-	Yes	-	Amplicon	-	-	-	-
1	26	Positive	PTPN11	chr12	112888199	C	A	c.215C>A (p.A72D)	nonsynonymous SNV	0	0	0	ID=COSM13035;OCCURENCE=1(autonomic_ganglia),8(haematopoietic_and_lymphoid_tissue),2(central_nervous_system)	0	32	Lib8_288_2F16	2F16	Yes	148	34249	0.239423	Yes	149	33338	0.269962	Yes	-	-	-	-	Yes	-	Amplicon	-	-	-	-
1	27	Positive	PTPN11	chr12	112888199	C	G	c.215C>G (p.A72G)	nonsynonymous SNV	0	0	rs121918454	ID=COSM5945277;OCCURENCE=2(haematopoietic_and_lymphoid_tissue)	CLINSIG=pathogenic|pathogenic|pathogenic|pathogenic|pathogenic|pathogenic,unknown;CLNDBN=Noonan_syndrome_1|Rasopathy|Juvenile_myelomonocytic_leukemia|Noonan_syndrome_1|Noonan's_syndrome|not_provided,not_provided;CLNREVSTAT=no_assertion_criteria_provided|criteria_provided\x2c_single_submitter|criteria_provided\x2c_single_submitter|criteria_provided\x2c_single_submitter|no_assertion_criteria_provid…	28.2	Lib9_13_1D23	1D23	Yes	148	17791	0.101175	Yes	149	19491	0.112873	Yes	-	-	-	-	Yes	-	smMIP	-	-	0.162514	1846
1	28	Positive	PTPN11	chr12	112888199	C	T	c.215C>T (p.A72V)	nonsynonymous SNV	0	0	0	ID=COSM13015;OCCURENCE=68(haematopoietic_and_lymphoid_tissue),1(thyroid),1(stomach),2(large_intestine)	CLINSIG=pathogenic|pathogenic|pathogenic|pathogenic|pathogenic|pathogenic,unknown;CLNDBN=Noonan_syndrome_1|Rasopathy|Juvenile_myelomonocytic_leukemia|Noonan_syndrome_1|Noonan's_syndrome|not_provided,not_provided;CLNREVSTAT=no_assertion_criteria_provided|criteria_provided\x2c_single_submitter|criteria_provided\x2c_single_submitter|criteria_provided\x2c_single_submitter|no_assertion_criteria_provid…	32	Lib10_24_2F4	2F4	Yes	148	22056	0.843308	Yes	149	25470	0.914802	Yes	-	-	-	-	Yes	-	Amplicon	-	-	-	-
1	29	Positive	PTPN11	chr12	112888202	C	T	c.218C>T (p.T73I)	nonsynonymous SNV	0	0	rs121918462	ID=COSM13019;OCCURENCE=19(haematopoietic_and_lymphoid_tissue)	CLINSIG=pathogenic|pathogenic|pathogenic|pathogenic|pathogenic|pathogenic|pathogenic;CLNDBN=Noonan_syndrome_1|Juvenile_myelomonocytic_leukemia|Noonan's_syndrome|Rasopathy|Juvenile_myelomonocytic_leukemia|Noonan_syndrome_1|Noonan's_syndrome;CLNREVSTAT=no_assertion_criteria_provided|criteria_provided\x2c_single_submitter|criteria_provided\x2c_single_submitter|criteria_provided\x2c_single_submitter|…	32	Lib8_279_2F7	2F7	Yes	148	24731	0.574178	Yes	149	24769	0.597521	Yes	-	-	-	-	Yes	-	Amplicon	-	-	-	-
1	29	Positive	PTPN11	chr12	112888202	C	T	c.218C>T (p.T73I)	nonsynonymous SNV	0	0	rs121918462	ID=COSM13019;OCCURENCE=19(haematopoietic_and_lymphoid_tissue)	CLINSIG=pathogenic|pathogenic|pathogenic|pathogenic|pathogenic|pathogenic|pathogenic;CLNDBN=Noonan_syndrome_1|Juvenile_myelomonocytic_leukemia|Noonan's_syndrome|Rasopathy|Juvenile_myelomonocytic_leukemia|Noonan_syndrome_1|Noonan's_syndrome;CLNREVSTAT=no_assertion_criteria_provided|criteria_provided\x2c_single_submitter|criteria_provided\x2c_single_submitter|criteria_provided\x2c_single_submitter|…	32	Lib8_286_2F13	2F13	Yes	148	29196	0.308261	Yes	149	30732	0.481583	Yes	-	-	-	-	Yes	-	Amplicon	-	-	-	-
1	30	Positive - double nucleotide mutation	PTPN11	chr12	112888210	G	C	c.226G>C (p.E76Q)	nonsynonymous SNV	0	0	0	ID=COSM13016;OCCURENCE=15(haematopoietic_and_lymphoid_tissue),1(soft_tissue)	CLINSIG=pathogenic|pathogenic|pathogenic,pathogenic;CLNDBN=Juvenile_myelomonocytic_leukemia|Rasopathy|Noonan's_syndrome,Rasopathy;CLNREVSTAT=no_assertion_criteria_provided|criteria_provided\x2c_single_submitter|no_assertion_criteria_provided,criteria_provided\x2c_single_submitter;CLNACC=RCV000014264.3|RCV000033476.5|RCV000156974.1,RCV000159045.1;CLNDSDB=MedGen:OMIM:Orphanet|MedGen|GeneReviews:Med…	27.6	Lib7_260_1D3	1D3	Yes	148	26078	0.245418	Yes	149	27163	0.128852	Yes	-	-	-	-	Yes	-	PCR	0.12	8165	-	-
1	31	Positive	PTPN11	chr12	112888211	A	C	c.227A>C (p.E76A)	nonsynonymous SNV	0	0	rs121918465	ID=COSM13026;OCCURENCE=1(skin),16(haematopoietic_and_lymphoid_tissue),2(autonomic_ganglia),1(central_nervous_system)	CLINSIG=pathogenic|pathogenic,probable-pathogenic|pathogenic,pathogenic;CLNDBN=Juvenile_myelomonocytic_leukemia|Rasopathy,Noonan_syndrome_1|Rasopathy,Juvenile_myelomonocytic_leukemia;CLNREVSTAT=no_assertion_criteria_provided|criteria_provided\x2c_single_submitter,criteria_provided\x2c_single_submitter|criteria_provided\x2c_single_submitter,no_assertion_criteria_provided;CLNACC=RCV000014267.3|RCV0…	27.9	Lib9_5_1D16	1D16	Yes	148	19553	0.444945	Yes	149	18899	0.449759	Yes	-	-	-	-	Yes	-	Amplicon/Inferred-same variant	-	-	0	302
1	31	Positive	PTPN11	chr12	112888211	A	C	c.227A>C (p.E76A)	nonsynonymous SNV	0	0	rs121918465	ID=COSM13026;OCCURENCE=1(skin),16(haematopoietic_and_lymphoid_tissue),2(autonomic_ganglia),1(central_nervous_system)	CLINSIG=pathogenic|pathogenic,probable-pathogenic|pathogenic,pathogenic;CLNDBN=Juvenile_myelomonocytic_leukemia|Rasopathy,Noonan_syndrome_1|Rasopathy,Juvenile_myelomonocytic_leukemia;CLNREVSTAT=no_assertion_criteria_provided|criteria_provided\x2c_single_submitter,criteria_provided\x2c_single_submitter|criteria_provided\x2c_single_submitter,no_assertion_criteria_provided;CLNACC=RCV000014267.3|RCV0…	27.9	Lib8_272_2F18	2F18	Yes	148	29465	0.81792	Yes	149	29263	0.560435	Yes	-	-	-	-	Yes	-	smMIP	-	-	0.501139	2195
1^	32	Positive	PTPN11	chr12	112888211	A	T	c.227A>T (p.E76V)	nonsynonymous SNV	0	0	rs121918465	ID=COSM13025;OCCURENCE=11(haematopoietic_and_lymphoid_tissue)	CLINSIG=pathogenic|pathogenic,probable-pathogenic|pathogenic,pathogenic;CLNDBN=Juvenile_myelomonocytic_leukemia|Rasopathy,Noonan_syndrome_1|Rasopathy,Juvenile_myelomonocytic_leukemia;CLNREVSTAT=no_assertion_criteria_provided|criteria_provided\x2c_single_submitter,criteria_provided\x2c_single_submitter|criteria_provided\x2c_single_submitter,no_assertion_criteria_provided;CLNACC=RCV000014267.3|RCV0…	31	Lib5_220_4EE25	4EE25	Yes	148	18609	0.037616	No	149	20640	0.242248	Yes	-	-	-	-	No	-	Inferred-same variant	-	-	-	-
1^	32	Positive - double nucleotide mutation	PTPN11	chr12	112888211	A	T	c.227A>T (p.E76V)	nonsynonymous SNV	0	0	rs121918465	ID=COSM13025;OCCURENCE=11(haematopoietic_and_lymphoid_tissue)	CLINSIG=pathogenic|pathogenic,probable-pathogenic|pathogenic,pathogenic;CLNDBN=Juvenile_myelomonocytic_leukemia|Rasopathy,Noonan_syndrome_1|Rasopathy,Juvenile_myelomonocytic_leukemia;CLNREVSTAT=no_assertion_criteria_provided|criteria_provided\x2c_single_submitter,criteria_provided\x2c_single_submitter|criteria_provided\x2c_single_submitter,no_assertion_criteria_provided;CLNACC=RCV000014267.3|RCV0…	31	Lib7_260_1D3	1D3	Yes	148	26078	0.253087	Yes	149	27163	0.150941	No	-	-	-	-	No	-	PCR	0.12	8165	-	-
1	32	Positive	PTPN11	chr12	112888211	A	T	c.227A>T (p.E76V)	nonsynonymous SNV	0	0	rs121918465	ID=COSM13025;OCCURENCE=11(haematopoietic_and_lymphoid_tissue)	CLINSIG=pathogenic|pathogenic,probable-pathogenic|pathogenic,pathogenic;CLNDBN=Juvenile_myelomonocytic_leukemia|Rasopathy,Noonan_syndrome_1|Rasopathy,Juvenile_myelomonocytic_leukemia;CLNREVSTAT=no_assertion_criteria_provided|criteria_provided\x2c_single_submitter,criteria_provided\x2c_single_submitter|criteria_provided\x2c_single_submitter,no_assertion_criteria_provided;CLNACC=RCV000014267.3|RCV0…	31	Lib10_27_2F26	2F26	Yes	148	16971	1.03117	Yes	149	17076	0.831576	Yes	-	-	-	-	Yes	-	PCR	0.769027	124782	-	-
1	33	Positive	PTPN11	chr12	112924336	G	A	c.1282G>A (p.V428M)	nonsynonymous SNV	4.063e-06	3.229e-05	0	ID=COSM546362;OCCURENCE=1(stomach),1(large_intestine),1(pancreas)	CLINSIG=probable-pathogenic;CLNDBN=Rasopathy;CLNREVSTAT=criteria_provided\x2c_single_submitter;CLNACC=RCV000033528.4;CLNDSDB=MedGen;CLNDSDBID=CN166718	32	Lib4_201_4EE6	4EE6	Yes	159	12622	0.56251	Yes	160	31706	0.510944	Yes	-	-	-	-	Yes	-	Amplicon	-	-	-	-
1	34	Positive	PTPN11	chr12	112924336	G	T	c.1282G>T (p.V428L)	nonsynonymous SNV	0	0	0	0	0	32	Lib2_163_4C25	4C25	Yes	159	14141	0.572802	Yes	160	28386	0.468541	Yes	-	-	-	-	Yes	-	Amplicon	-	-	-	-
1^	35	Positive	PTPN11	chr12	112926908	C	A	c.1528C>A (p.Q510K)	nonsynonymous SNV	0	0	0	ID=COSM13031;OCCURENCE=2(haematopoietic_and_lymphoid_tissue),1(soft_tissue)	CLINSIG=pathogenic,pathogenic|pathogenic|pathogenic;CLNDBN=Rasopathy,Rasopathy|LEOPARD_syndrome_1|Noonan_syndrome_1;CLNREVSTAT=criteria_provided\x2c_single_submitter,criteria_provided\x2c_single_submitter|criteria_provided\x2c_single_submitter|criteria_provided\x2c_single_submitter;CLNACC=RCV000033552.2,RCV000033553.5|RCV000055888.1|RCV000154278.1;CLNDSDB=MedGen,MedGen|GeneReviews:MedGen:OMIM:Orp…	33	Lib6_236_4F23	4F23	Yes	162	25916	0.038586	No	163	21583	0.125098	Yes	-	-	-	-	No	-	Inferred-same event	-	-	-	-
1	35	Positive	PTPN11	chr12	112926908	C	A	c.1528C>A (p.Q510K)	nonsynonymous SNV	0	0	0	ID=COSM13031;OCCURENCE=2(haematopoietic_and_lymphoid_tissue),1(soft_tissue)	CLINSIG=pathogenic,pathogenic|pathogenic|pathogenic;CLNDBN=Rasopathy,Rasopathy|LEOPARD_syndrome_1|Noonan_syndrome_1;CLNREVSTAT=criteria_provided\x2c_single_submitter,criteria_provided\x2c_single_submitter|criteria_provided\x2c_single_submitter|criteria_provided\x2c_single_submitter;CLNACC=RCV000033552.2,RCV000033553.5|RCV000055888.1|RCV000154278.1;CLNDSDB=MedGen,MedGen|GeneReviews:MedGen:OMIM:Orp…	33	Lib5_234_4F19	4F19	Yes	162	24515	0.179482	Yes	163	20129	0.427244	Yes	-	-	-	-	Yes	-	smMIP	-	-	0.125392	1595
1	36	Positive	RET	chr10	43613906	G	C	c.2370G>C (p.L790F)	nonsynonymous SNV	4.063e-06	0	rs75030001	0	CLINSIG=pathogenic|pathogenic|pathogenic,pathogenic|pathogenic;CLNDBN=Multiple_endocrine_neoplasia\x2c_type_2a|Familial_medullary_thyroid_carcinoma|MEN2A_and_FMTC,MEN2A_and_FMTC|Hereditary_cancer-predisposing_syndrome;CLNREVSTAT=no_assertion_criteria_provided|no_assertion_criteria_provided|no_assertion_criteria_provided,no_assertion_criteria_provided|criteria_provided\x2c_single_submitter;CLNACC=…	25	Lib5_221_4F1	4F1	Yes	62	24013	0.183234	Yes	63	13630	0.124725	Yes	-	-	-	-	Yes	-	Amplicon	-	-	-	-
1^	37	Positive	RET	chr10	43613906	G	T	c.2370G>T (p.L790F)	nonsynonymous SNV	2.032e-05	0	rs75030001	0	CLINSIG=pathogenic|pathogenic|pathogenic,pathogenic|pathogenic;CLNDBN=Multiple_endocrine_neoplasia\x2c_type_2a|Familial_medullary_thyroid_carcinoma|MEN2A_and_FMTC,MEN2A_and_FMTC|Hereditary_cancer-predisposing_syndrome;CLNREVSTAT=no_assertion_criteria_provided|no_assertion_criteria_provided|no_assertion_criteria_provided,no_assertion_criteria_provided|criteria_provided\x2c_single_submitter;CLNACC=…	25.3	Lib4_205_4EE10	4EE10	Yes	62	18770	0.207778	Yes	63	10751	0	No	-	-	-	-	No	-	Inferred-same event	-	-	-	-
1^	37	Positive	RET	chr10	43613906	G	T	c.2370G>T (p.L790F)	nonsynonymous SNV	2.032e-05	0	rs75030001	0	CLINSIG=pathogenic|pathogenic|pathogenic,pathogenic|pathogenic;CLNDBN=Multiple_endocrine_neoplasia\x2c_type_2a|Familial_medullary_thyroid_carcinoma|MEN2A_and_FMTC,MEN2A_and_FMTC|Hereditary_cancer-predisposing_syndrome;CLNREVSTAT=no_assertion_criteria_provided|no_assertion_criteria_provided|no_assertion_criteria_provided,no_assertion_criteria_provided|criteria_provided\x2c_single_submitter;CLNACC=…	25.3	Lib16_128_4EE3	4EE3	Yes	62	19803	0.095945	Yes	63	11905	0.041999	No	-	-	-	-	No	-	Inferred-same event	-	-	-	-
1	37	Positive	RET	chr10	43613906	G	T	c.2370G>T (p.L790F)	nonsynonymous SNV	2.032e-05	0	rs75030001	0	CLINSIG=pathogenic|pathogenic|pathogenic,pathogenic|pathogenic;CLNDBN=Multiple_endocrine_neoplasia\x2c_type_2a|Familial_medullary_thyroid_carcinoma|MEN2A_and_FMTC,MEN2A_and_FMTC|Hereditary_cancer-predisposing_syndrome;CLNREVSTAT=no_assertion_criteria_provided|no_assertion_criteria_provided|no_assertion_criteria_provided,no_assertion_criteria_provided|criteria_provided\x2c_single_submitter;CLNACC=…	25.3	Lib14_93_4B17	4B17	Yes	62	21040	0.394487	Yes	63	12448	0.449871	Yes	-	-	-	-	Yes	-	Amplicon	-	-	-	-
1	38	Positive	RET	chr10	43615613	G	T	c.2692G>T (p.D898Y)	nonsynonymous SNV	4.072e-06	0	0	0	CLINSIG=unknown;CLNDBN=Multiple_endocrine_neoplasia\x2c_type_2;CLNREVSTAT=no_assertion_criteria_provided;CLNACC=RCV000123314.1;CLNDSDB=GeneReviews:MedGen:Orphanet:SNOMED_CT;CLNDSDBID=NBK1257:CN073359:ORPHA653:61808009	33	Lib8_280_2F8	2F8	Yes	67	16818	0.190272	Yes	68	11402	0.105245	Yes	-	-	-	-	Yes	-	Amplicon	-	-	-	-
1	39	Positive	SOS1	chr2	39250292	T	G	c.1277A>C (p.Q426P)	nonsynonymous SNV	0	0	0	0	0	24.5	Lib4_201_4EE6	4EE6	Yes	267	5616	0.302707	Yes	268	8368	0.43021	Yes	-	-	-	-	Yes	-	PCR	0.197069	47699	-	-
2	40	Positive	BRAF	chr7	140453155	C	G	c.1780G>C (p.D594H)	nonsynonymous SNV	0	0	0	ID=COSM144576;OCCURENCE=1(skin),1(large_intestine),1(lung)	0	29.8	Lib8_272_2F18	2F18	No	393	21020	0.23	Yes	-	-	-	-	-	-	-	-	-	-	PCR	0.115727	67400	-	-
2	40	Positive	BRAF	chr7	140453155	C	G	c.1780G>C (p.D594H)	nonsynonymous SNV	0	0	0	ID=COSM144576;OCCURENCE=1(skin),1(large_intestine),1(lung)	0	29.8	Lib8_286_2F13	2F13	No	393	23601	0.06	Yes	-	-	-	-	-	-	-	-	-	-	PCR	0.0541659	72001	-	-
2	41	Positive	BRAF	chr7	140453132	T	G	c.1803A>C (p.K601N)	nonsynonymous SNV	0	0	rs121913365	ID=COSM1132;OCCURENCE=1(large_intestine),1(skin),1(NS),2(haematopoietic_and_lymphoid_tissue),2(ovary)	0	24.1	Lib3_192_4D32	4D32	No	393	10737	0.22	Yes	-	-	-	-	-	-	-	-	-	-	PCR	0.1275	145097	-	-
2	41	Positive	BRAF	chr7	140453132	T	G	c.1803A>C (p.K601N)	nonsynonymous SNV	0	0	rs121913365	ID=COSM1132;OCCURENCE=1(large_intestine),1(skin),1(NS),2(haematopoietic_and_lymphoid_tissue),2(ovary)	0	24.1	Lib2_165_4C27	4C27	No	393	16749	0.42	Yes	-	-	-	-	-	-	-	-	-	-	PCR	0.951	109275	-	-
2	42	Positive	CBL	chr11	119148991	G	A	c.1211G>A (p.C404Y)	nonsynonymous SNV	8.126e-06	3.229e-05	rs192712314	ID=COSM34068;OCCURENCE=15(haematopoietic_and_lymphoid_tissue)	0	25	Lib16_141_5J17R	5J17R	Yes	122	5186	0.520632	Yes	123	59	0	No	-	-	-	-	No	No	smMIP	-	-	0.195052	9722
2	42	Positive	CBL	chr11	119148991	G	A	c.1211G>A (p.C404Y)	nonsynonymous SNV	8.126e-06	3.229e-05	rs192712314	ID=COSM34068;OCCURENCE=15(haematopoietic_and_lymphoid_tissue)	0	25	Lib13_73_5J11	5J11	Yes	122	6478	0.632911	Yes	123	85	0	No	-	-	-	-	No	-	smMIP	-	-	0.231725	9472
2	43	Positive	FGFR2	chr10	123276865	G	C	c.1052C>G (p.S351C)	nonsynonymous SNV	0	0	rs121918502	0	CLINSIG=pathogenic|pathogenic;CLNDBN=PFEIFFER_SYNDROME\x2c_TYPE_III|Antley-Bixler_syndrome_without_genital_anomalies_or_disordered_steroidogenesis;CLNREVSTAT=no_assertion_criteria_provided|no_assertion_criteria_provided;CLNACC=RCV000014208.23|RCV000014209.16;CLNDSDB=.|GeneReviews:MedGen:OMIM:Orphanet;CLNDSDBID=.|NBK1419:C2936791:207410:ORPHA83	14.42	Lib1_160_4C22	4C22	No	45	13849	0.13	Yes	-	-	-	-	-	-	-	-	-	-	smMIP	-	-	0.124743	13607
2	43	Positive	FGFR2	chr10	123276865	G	C	c.1052C>G (p.S351C)	nonsynonymous SNV	0	0	rs121918502	0	CLINSIG=pathogenic|pathogenic;CLNDBN=PFEIFFER_SYNDROME\x2c_TYPE_III|Antley-Bixler_syndrome_without_genital_anomalies_or_disordered_steroidogenesis;CLNREVSTAT=no_assertion_criteria_provided|no_assertion_criteria_provided;CLNACC=RCV000014208.23|RCV000014209.16;CLNDSDB=.|GeneReviews:MedGen:OMIM:Orphanet;CLNDSDBID=.|NBK1419:C2936791:207410:ORPHA83	14.42	Lib1_161_4C23	4C23	No	45	14292	0.24	Yes	-	-	-	-	-	-	-	-	-	-	smMIP	-	-	0.145012	13770
2	43	Positive	FGFR2	chr10	123276865	G	C	c.1052C>G (p.S351C)	nonsynonymous SNV	0	0	rs121918502	0	CLINSIG=pathogenic|pathogenic;CLNDBN=PFEIFFER_SYNDROME\x2c_TYPE_III|Antley-Bixler_syndrome_without_genital_anomalies_or_disordered_steroidogenesis;CLNREVSTAT=no_assertion_criteria_provided|no_assertion_criteria_provided;CLNACC=RCV000014208.23|RCV000014209.16;CLNDSDB=.|GeneReviews:MedGen:OMIM:Orphanet;CLNDSDBID=.|NBK1419:C2936791:207410:ORPHA83	14.42	Lib1_145_4C4	4C4	No	45	14346	0.26	Yes	-	-	-	-	-	-	-	-	-	-	Inferred-same event	-	-	-	-
2	43	Positive	FGFR2	chr10	123276865	G	C	c.1052C>G (p.S351C)	nonsynonymous SNV	0	0	rs121918502	0	CLINSIG=pathogenic|pathogenic;CLNDBN=PFEIFFER_SYNDROME\x2c_TYPE_III|Antley-Bixler_syndrome_without_genital_anomalies_or_disordered_steroidogenesis;CLNREVSTAT=no_assertion_criteria_provided|no_assertion_criteria_provided;CLNACC=RCV000014208.23|RCV000014209.16;CLNDSDB=.|GeneReviews:MedGen:OMIM:Orphanet;CLNDSDBID=.|NBK1419:C2936791:207410:ORPHA83	14.42	Lib5_231_4F16	4F16	No	45	20000	0.09	Yes	-	-	-	-	-	-	-	-	-	-	Inferred-same event	-	-	-	-
2	44	Positive	FGFR2	chr10	123276893	A	T	c.1024T>A (p.C342S)	nonsynonymous SNV	0	0	rs121918488	0	CLINSIG=pathogenic|pathogenic|pathogenic|pathogenic,pathogenic|pathogenic|pathogenic;CLNDBN=Crouzon_syndrome|Pfeiffer_syndrome|Jackson-Weiss_syndrome|Antley-Bixler_syndrome_without_genital_anomalies_or_disordered_steroidogenesis,Crouzon_syndrome|Jackson-Weiss_syndrome|Antley-Bixler_syndrome_without_genital_anomalies_or_disordered_steroidogenesis;CLNREVSTAT=no_assertion_criteria_provided|no_assert…	16.64	Lib9_6_1D17a	1D17a	No	45	14086	0.26	Yes	-	-	-	-	-	-	-	-	-	-	Inferred-same event	-	-	-	-
2	44	Positive	FGFR2	chr10	123276893	A	T	c.1024T>A (p.C342S)	nonsynonymous SNV	0	0	rs121918488	0	CLINSIG=pathogenic|pathogenic|pathogenic|pathogenic,pathogenic|pathogenic|pathogenic;CLNDBN=Crouzon_syndrome|Pfeiffer_syndrome|Jackson-Weiss_syndrome|Antley-Bixler_syndrome_without_genital_anomalies_or_disordered_steroidogenesis,Crouzon_syndrome|Jackson-Weiss_syndrome|Antley-Bixler_syndrome_without_genital_anomalies_or_disordered_steroidogenesis;CLNREVSTAT=no_assertion_criteria_provided|no_assert…	16.64	Lib9_13_1D23	1D23	No	45	16380	0.56	Yes	-	-	-	-	-	-	-	-	-	-	Inferred-same event	-	-	-	-
2	44	Positive	FGFR2	chr10	123276893	A	T	c.1024T>A (p.C342S)	nonsynonymous SNV	0	0	rs121918488	0	CLINSIG=pathogenic|pathogenic|pathogenic|pathogenic,pathogenic|pathogenic|pathogenic;CLNDBN=Crouzon_syndrome|Pfeiffer_syndrome|Jackson-Weiss_syndrome|Antley-Bixler_syndrome_without_genital_anomalies_or_disordered_steroidogenesis,Crouzon_syndrome|Jackson-Weiss_syndrome|Antley-Bixler_syndrome_without_genital_anomalies_or_disordered_steroidogenesis;CLNREVSTAT=no_assertion_criteria_provided|no_assert…	16.64	Lib9_17_1D27	1D27	No	45	16432	0.44	Yes	-	-	-	-	-	-	-	-	-	-	Inferred-same event	-	-	-	-
2	44	Positive	FGFR2	chr10	123276893	A	T	c.1024T>A (p.C342S)	nonsynonymous SNV	0	0	rs121918488	0	CLINSIG=pathogenic|pathogenic|pathogenic|pathogenic,pathogenic|pathogenic|pathogenic;CLNDBN=Crouzon_syndrome|Pfeiffer_syndrome|Jackson-Weiss_syndrome|Antley-Bixler_syndrome_without_genital_anomalies_or_disordered_steroidogenesis,Crouzon_syndrome|Jackson-Weiss_syndrome|Antley-Bixler_syndrome_without_genital_anomalies_or_disordered_steroidogenesis;CLNREVSTAT=no_assertion_criteria_provided|no_assert…	16.64	Lib9_12_1D22	1D22	No	45	17715	0.51	Yes	-	-	-	-	-	-	-	-	-	-	Inferred-same event	-	-	-	-
2	44	Positive	FGFR2	chr10	123276893	A	T	c.1024T>A (p.C342S)	nonsynonymous SNV	0	0	rs121918488	0	CLINSIG=pathogenic|pathogenic|pathogenic|pathogenic,pathogenic|pathogenic|pathogenic;CLNDBN=Crouzon_syndrome|Pfeiffer_syndrome|Jackson-Weiss_syndrome|Antley-Bixler_syndrome_without_genital_anomalies_or_disordered_steroidogenesis,Crouzon_syndrome|Jackson-Weiss_syndrome|Antley-Bixler_syndrome_without_genital_anomalies_or_disordered_steroidogenesis;CLNREVSTAT=no_assertion_criteria_provided|no_assert…	16.64	Lib9_18_1D28	1D28	No	45	17741	1.98	Yes	-	-	-	-	-	-	-	-	-	-	Inferred-same event	-	-	-	-
2	44	Positive	FGFR2	chr10	123276893	A	T	c.1024T>A (p.C342S)	nonsynonymous SNV	0	0	rs121918488	0	CLINSIG=pathogenic|pathogenic|pathogenic|pathogenic,pathogenic|pathogenic|pathogenic;CLNDBN=Crouzon_syndrome|Pfeiffer_syndrome|Jackson-Weiss_syndrome|Antley-Bixler_syndrome_without_genital_anomalies_or_disordered_steroidogenesis,Crouzon_syndrome|Jackson-Weiss_syndrome|Antley-Bixler_syndrome_without_genital_anomalies_or_disordered_steroidogenesis;CLNREVSTAT=no_assertion_criteria_provided|no_assert…	16.64	Lib7_264_1D7	1D7	No	45	20228	0.33	Yes	-	-	-	-	-	-	-	-	-	-	PCR & smMIP	0.346111	42183	-	-
2	44	Positive	FGFR2	chr10	123276893	A	T	c.1024T>A (p.C342S)	nonsynonymous SNV	0	0	rs121918488	0	CLINSIG=pathogenic|pathogenic|pathogenic|pathogenic,pathogenic|pathogenic|pathogenic;CLNDBN=Crouzon_syndrome|Pfeiffer_syndrome|Jackson-Weiss_syndrome|Antley-Bixler_syndrome_without_genital_anomalies_or_disordered_steroidogenesis,Crouzon_syndrome|Jackson-Weiss_syndrome|Antley-Bixler_syndrome_without_genital_anomalies_or_disordered_steroidogenesis;CLNREVSTAT=no_assertion_criteria_provided|no_assert…	16.64	Lib10_19_1D29	1D29	No	45	24519	2.95	Yes	-	-	-	-	-	-	-	-	-	-	PCR & smMIP	2.88122	45085	3.16311	14449
2	45	Positive	FGFR2	chr10	123258034	A	C	c.1647T>G (p.N549K)	nonsynonymous SNV	0	0	0	ID=COSM427161,COSM3930931,COSM36902,COSM427160,COSM1474414;OCCURENCE=2(upper_aerodigestive_tract),6(endometrium),1(urinary_tract),1(breast)	0	26.3	Lib3_181_4D18	4D18	No	39	21825	0.14	Yes	-	-	-	-	-	-	-	-	-	-	Inferred-same variant	-	-	-	-
2	45	Positive	FGFR2	chr10	123258034	A	C	c.1647T>G (p.N549K)	nonsynonymous SNV	0	0	0	ID=COSM427161,COSM3930931,COSM36902,COSM427160,COSM1474414;OCCURENCE=2(upper_aerodigestive_tract),6(endometrium),1(urinary_tract),1(breast)	0	26.3	Lib14_95_4B20	4B20	No	39	22883	0.34	Yes	-	-	-	-	-	-	-	-	-	-	PCR	0.0039	86631	-	-
2	46	Positive	FGFR3	chr4	1808029	C	G	c.2005C>G (p.R669G)	nonsynonymous SNV	4.105e-06	0	0	0	0	25.1	Lib7_267_1D10A	1D10A	No	354	13085	0.24	Yes	-	-	-	-	-	-	-	-	-	-	PCR	0.001	8219	-	-
2	46	Positive	FGFR3	chr4	1808029	C	G	c.2005C>G (p.R669G)	nonsynonymous SNV	4.105e-06	0	0	0	0	25.1	Lib9_3_1D15a	1D15a	No	354	14672	0.14	Yes	-	-	-	-	-	-	-	-	-	-	Inferred-same event	-	-	-	-
2	47	Positive	LRP5	chr11	68115514	C	T	c.291C>T (p.A97A)	synonymous SNV	0.0005	0.0005	rs146667935	0	0	11	Lib6_242_4G1	4G1	No	134	15626	0.543965	Yes	-	-	-	-	-	-	-	-	-	-	Inferred-same event	-	-	-	-
2	47	Positive	LRP5	chr11	68115514	C	T	c.291C>T (p.A97A)	synonymous SNV	0.0005	0.0005	rs146667935	0	0	11	Lib6_240_4F27	4F27	No	134	19229	1.19617	Yes	-	-	-	-	-	-	-	-	-	-	PCR	1.58	124836	-	-
2	47	Positive	LRP5	chr11	68115514	C	T	c.291C>T (p.A97A)	synonymous SNV	0.0005	0.0005	rs146667935	0	0	11	Lib4_213_4EE18	4EE18	No	134	20153	0.699648	Yes	-	-	-	-	-	-	-	-	-	-	PCR	0.66	135039	-	-
2	47	Positive	LRP5	chr11	68115514	C	T	c.291C>T (p.A97A)	synonymous SNV	0.0005	0.0005	rs146667935	0	0	11	Lib5_220_4EE25	4EE25	No	134	52902	0.529281	Yes	-	-	-	-	-	-	-	-	-	-	Inferred-same event	-	-	-	-
2	48	Positive	MAP2K2	chr19	4110584	A	T	c.373T>A (p.C125S)	nonsynonymous SNV	0	0	0	ID=COSM5855815,COSM5855814;OCCURENCE=1(NS)	0	26	Lib8_283_2F11	2F11	No	239	20609	0.21	Yes	-	-	-	-	-	-	-	-	-	-	PCR	0.105285	146269	-	-
2	48	Positive	MAP2K2	chr19	4110584	A	T	c.373T>A (p.C125S)	nonsynonymous SNV	0	0	0	ID=COSM5855815,COSM5855814;OCCURENCE=1(NS)	0	26	Lib8_288_2F16	2F16	No	239	26022	0.14	Yes	-	-	-	-	-	-	-	-	-	-	PCR	0.189236	80323	-	-
2	49	Positive	NF1	chr17	29554264	G	A	c.2280G>A (p.M760I)	nonsynonymous SNV	0	0	0	0	0	24.6	Lib15_113_4G15	4G15	No	203	8212	0.95	Yes	-	-	-	-	-	-	-	-	-	-	PCR	1.39604	8739	-	-
2	49	Positive	NF1	chr17	29554264	G	A	c.2280G>A (p.M760I)	nonsynonymous SNV	0	0	0	0	0	24.6	Lib15_110_4F22	4F22	No	203	12257	1.12	Yes	-	-	-	-	-	-	-	-	-	-	PCR	1.49	80688	-	-
2	49	Positive	NF1	chr17	29554264	G	A	c.2280G>A (p.M760I)	nonsynonymous SNV	0	0	0	0	0	24.6	Lib6_236_4F23	4F23	No	203	13356	1.25	Yes	-	-	-	-	-	-	-	-	-	-	PCR	0.358923	10030	-	-
2	49	Positive	NF1	chr17	29554264	G	A	c.2280G>A (p.M760I)	nonsynonymous SNV	0	0	0	0	0	24.6	Lib6_246_4G5	4G5	No	203	16592	1.15	Yes	-	-	-	-	-	-	-	-	-	-	PCR	0.823072	15187	-	-
2	49	Positive	NF1	chr17	29554264	G	A	c.2280G>A (p.M760I)	nonsynonymous SNV	0	0	0	0	0	24.6	Lib15_109_4F21	4F21	No	203	19336	1.1	Yes	-	-	-	-	-	-	-	-	-	-	PCR	0.96402	13174	-	-
2	49	Positive	NF1	chr17	29554264	G	A	c.2280G>A (p.M760I)	nonsynonymous SNV	0	0	0	0	0	24.6	Lib6_239_4F26	4F26	No	203	20698	2.07	Yes	-	-	-	-	-	-	-	-	-	-	PCR	1.31	79000	-	-
2	49	Positive	NF1	chr17	29554264	G	A	c.2280G>A (p.M760I)	nonsynonymous SNV	0	0	0	0	0	24.6	Lib6_251_4G11	4G11	No	203	20808	1.38	Yes	-	-	-	-	-	-	-	-	-	-	Inferred-same event	-	-	-	-
2	49	Positive	NF1	chr17	29554264	G	A	c.2280G>A (p.M760I)	nonsynonymous SNV	0	0	0	0	0	24.6	Lib3_192_4D32	4D32	No	203	30586	0.96	Yes	-	-	-	-	-	-	-	-	-	-	PCR	0.882353	16660	-	-
2	49	Positive	NF1	chr17	29554264	G	A	c.2280G>A (p.M760I)	nonsynonymous SNV	0	0	0	0	0	24.6	Lib2_175_4D11	4D11	No	203	38890	0.87	Yes	-	-	-	-	-	-	-	-	-	-	PCR	0.511414	21509	-	-
2	50	Positive	PTPN11	chr12	112888166	A	C	c.182A>C (p.D61A)	nonsynonymous SNV	0	0	0	ID=COSM5945275;OCCURENCE=1(haematopoietic_and_lymphoid_tissue)	CLINSIG=probable-pathogenic,pathogenic|pathogenic|pathogenic|pathogenic|pathogenic,pathogenic;CLNDBN=Noonan_syndrome_1,Noonan_syndrome_1|Rasopathy|not_provided|Juvenile_myelomonocytic_leukemia|Noonan's_syndrome,Rasopathy;CLNREVSTAT=criteria_provided\x2c_single_submitter,criteria_provided\x2c_single_submitter|criteria_provided\x2c_single_submitter|criteria_provided\x2c_single_submitter|no_assertio…	27.8	Lib10_24_2F4	2F4	No	148	22056	0.26	Yes	-	-	-	-	-	-	-	-	-	-	PCR	0.46	1445	-	-
2	50	Positive	PTPN11	chr12	112888166	A	C	c.182A>C (p.D61A)	nonsynonymous SNV	0	0	0	ID=COSM5945275;OCCURENCE=1(haematopoietic_and_lymphoid_tissue)	CLINSIG=probable-pathogenic,pathogenic|pathogenic|pathogenic|pathogenic|pathogenic,pathogenic;CLNDBN=Noonan_syndrome_1,Noonan_syndrome_1|Rasopathy|not_provided|Juvenile_myelomonocytic_leukemia|Noonan's_syndrome,Rasopathy;CLNREVSTAT=criteria_provided\x2c_single_submitter,criteria_provided\x2c_single_submitter|criteria_provided\x2c_single_submitter|criteria_provided\x2c_single_submitter|no_assertio…	27.8	Lib8_277_2F5	2F5	No	148	22386	1.02	Yes	-	-	-	-	-	-	-	-	-	-	PCR	0.84	1427	-	-
2	51	Positive	PTPN11	chr12	112888166	A	G	c.182A>G (p.D61G)	nonsynonymous SNV	0	0	rs121918461	ID=COSM14269;OCCURENCE=6(haematopoietic_and_lymphoid_tissue)	CLINSIG=probable-pathogenic,pathogenic|pathogenic|pathogenic|pathogenic|pathogenic,pathogenic;CLNDBN=Noonan_syndrome_1,Noonan_syndrome_1|Rasopathy|not_provided|Juvenile_myelomonocytic_leukemia|Noonan's_syndrome,Rasopathy;CLNREVSTAT=criteria_provided\x2c_single_submitter,criteria_provided\x2c_single_submitter|criteria_provided\x2c_single_submitter|criteria_provided\x2c_single_submitter|no_assertio…	29.3	Lib4_200_4EE5	4EE5	No	148	10872	0.73	Yes	-	-	-	-	-	-	-	-	-	-	smMIP	-	-	0.451414	4209
2	51	Positive	PTPN11	chr12	112888166	A	G	c.182A>G (p.D61G)	nonsynonymous SNV	0	0	rs121918461	ID=COSM14269;OCCURENCE=6(haematopoietic_and_lymphoid_tissue)	CLINSIG=probable-pathogenic,pathogenic|pathogenic|pathogenic|pathogenic|pathogenic,pathogenic;CLNDBN=Noonan_syndrome_1,Noonan_syndrome_1|Rasopathy|not_provided|Juvenile_myelomonocytic_leukemia|Noonan's_syndrome,Rasopathy;CLNREVSTAT=criteria_provided\x2c_single_submitter,criteria_provided\x2c_single_submitter|criteria_provided\x2c_single_submitter|criteria_provided\x2c_single_submitter|no_assertio…	29.3	Lib15_122_4D3	4D3	No	148	24987	0.71	Yes	-	-	-	-	-	-	-	-	-	-	smMIP	-	-	0.371747	3228
2	52	Positive	PTPN11	chr12	112891083	G	T	c.417G>T (p.E139D)	nonsynonymous SNV	0	0	0	ID=COSM5428489;OCCURENCE=1(haematopoietic_and_lymphoid_tissue)	CLINSIG=pathogenic|pathogenic|pathogenic|pathogenic|pathogenic,pathogenic|pathogenic;CLNDBN=Rasopathy|not_provided|Juvenile_myelomonocytic_leukemia|Noonan_syndrome_1|Noonan's_syndrome,Rasopathy|Noonan_syndrome_1;CLNREVSTAT=criteria_provided\x2c_single_submitter|criteria_provided\x2c_single_submitter|no_assertion_criteria_provided|criteria_provided\x2c_single_submitter|no_assertion_criteria_provid…	28	Lib6_251_4G11	4G11	No	150	9944	0.56	Yes	-	-	-	-	-	-	-	-	-	-	PCR	0.6	12054	-	-
2	52	Positive	PTPN11	chr12	112891083	G	T	c.417G>T (p.E139D)	nonsynonymous SNV	0	0	0	ID=COSM5428489;OCCURENCE=1(haematopoietic_and_lymphoid_tissue)	CLINSIG=pathogenic|pathogenic|pathogenic|pathogenic|pathogenic,pathogenic|pathogenic;CLNDBN=Rasopathy|not_provided|Juvenile_myelomonocytic_leukemia|Noonan_syndrome_1|Noonan's_syndrome,Rasopathy|Noonan_syndrome_1;CLNREVSTAT=criteria_provided\x2c_single_submitter|criteria_provided\x2c_single_submitter|no_assertion_criteria_provided|criteria_provided\x2c_single_submitter|no_assertion_criteria_provid…	28	Lib6_252_4G12	4G12	No	150	11324	0.15	Yes	-	-	-	-	-	-	-	-	-	-	PCR	0.26	11715	-	-
2	53	Positive	PTPN11	chr12	112915455	T	G	c.854T>G (p.F285C)	nonsynonymous SNV	0	0	0	0	CLINSIG=pathogenic,pathogenic|pathogenic|pathogenic|pathogenic,pathogenic|pathogenic;CLNDBN=Rasopathy,Noonan_syndrome_1|Rasopathy|Noonan's_syndrome|not_provided,Rasopathy|Noonan_syndrome_1;CLNREVSTAT=criteria_provided\x2c_single_submitter,criteria_provided\x2c_single_submitter|criteria_provided\x2c_single_submitter|no_assertion_criteria_provided|criteria_provided\x2c_single_submitter,criteria_pro…	24.3	Lib10_21_2F1	2F1	No	155	16123	0.09	Yes	-	-	-	-	-	-	-	-	-	-	Inferred-same event	-	-	-	-
2	53	Positive	PTPN11	chr12	112915455	T	G	c.854T>G (p.F285C)	nonsynonymous SNV	0	0	0	0	CLINSIG=pathogenic,pathogenic|pathogenic|pathogenic|pathogenic,pathogenic|pathogenic;CLNDBN=Rasopathy,Noonan_syndrome_1|Rasopathy|Noonan's_syndrome|not_provided,Rasopathy|Noonan_syndrome_1;CLNREVSTAT=criteria_provided\x2c_single_submitter,criteria_provided\x2c_single_submitter|criteria_provided\x2c_single_submitter|no_assertion_criteria_provided|criteria_provided\x2c_single_submitter,criteria_pro…	24.3	Lib8_278_2F6	2F6	No	155	19272	0.24	Yes	-	-	-	-	-	-	-	-	-	-	smMIP	-	-	0.347222	1152
2	54	Positive	PTPN11	chr12	112915523	A	G	c.922A>G (p.N308D)	nonsynonymous SNV	1.219e-05	0	rs28933386	ID=COSM24612;OCCURENCE=3(haematopoietic_and_lymphoid_tissue),1(central_nervous_system)	CLINSIG=pathogenic|pathogenic|pathogenic|pathogenic|pathogenic|pathogenic;CLNDBN=Noonan_syndrome_1|Rasopathy|not_provided|Noonan's_syndrome|LEOPARD_syndrome|Noonan's_syndrome;CLNREVSTAT=criteria_provided\x2c_multiple_submitters\x2c_no_conflicts|criteria_provided\x2c_single_submitter|no_assertion_criteria_provided|no_assertion_criteria_provided|no_assertion_criteria_provided|no_assertion_criteria_…	22.3	Lib1_159_4C21	4C21	No	155	8356	0.68	Yes	-	-	-	-	-	-	-	-	-	-	PCR	0.278	20461	0.195174	5636
2	54	Positive	PTPN11	chr12	112915523	A	G	c.922A>G (p.N308D)	nonsynonymous SNV	1.219e-05	0	rs28933386	ID=COSM24612;OCCURENCE=3(haematopoietic_and_lymphoid_tissue),1(central_nervous_system)	CLINSIG=pathogenic|pathogenic|pathogenic|pathogenic|pathogenic|pathogenic;CLNDBN=Noonan_syndrome_1|Rasopathy|not_provided|Noonan's_syndrome|LEOPARD_syndrome|Noonan's_syndrome;CLNREVSTAT=criteria_provided\x2c_multiple_submitters\x2c_no_conflicts|criteria_provided\x2c_single_submitter|no_assertion_criteria_provided|no_assertion_criteria_provided|no_assertion_criteria_provided|no_assertion_criteria_…	22.3	Lib2_180_4D17	4D17	No	155	14329	0.69	Yes	-	-	-	-	-	-	-	-	-	-	PCR	0.375	17183	0.340993	6745
2	56	Positive	PTPN11	chr12	112926890	A	G	c.1510A>G (p.M504V)	nonsynonymous SNV	4.061e-06	0	0	ID=COSM4603683;OCCURENCE=1(haematopoietic_and_lymphoid_tissue)	CLINSIG=pathogenic|pathogenic|pathogenic|pathogenic;CLNDBN=Rasopathy|Noonan_syndrome_1|not_provided|Noonan's_syndrome;CLNREVSTAT=criteria_provided\x2c_single_submitter|criteria_provided\x2c_single_submitter|criteria_provided\x2c_single_submitter|no_assertion_criteria_provided;CLNACC=RCV000033549.6|RCV000037616.2|RCV000077853.4|RCV000156983.1;CLNDSDB=MedGen|GeneReviews:MedGen:OMIM:Orphanet|MedGen|…	26.4	Lib1_151_4C13	4C13	No	162	10493	0.67	Yes	-	-	-	-	-	-	-	-	-	-	smMIP	-	-	0.571491	9047
2	56	Positive	PTPN11	chr12	112926890	A	G	c.1510A>G (p.M504V)	nonsynonymous SNV	4.061e-06	0	0	ID=COSM4603683;OCCURENCE=1(haematopoietic_and_lymphoid_tissue)	CLINSIG=pathogenic|pathogenic|pathogenic|pathogenic;CLNDBN=Rasopathy|Noonan_syndrome_1|not_provided|Noonan's_syndrome;CLNREVSTAT=criteria_provided\x2c_single_submitter|criteria_provided\x2c_single_submitter|criteria_provided\x2c_single_submitter|no_assertion_criteria_provided;CLNACC=RCV000033549.6|RCV000037616.2|RCV000077853.4|RCV000156983.1;CLNDSDB=MedGen|GeneReviews:MedGen:OMIM:Orphanet|MedGen|…	26.4	Lib4_205_4EE10	4EE10	No	162	15493	0.82	Yes	-	-	-	-	-	-	-	-	-	-	smMIP	-	-	0.207792	7684
2	57	Positive	RAF1	chr3	12645699	G	A	c.770C>T (p.S257L)	nonsynonymous SNV	0	0	rs80338796	ID=COSM181063,COSM3586964;OCCURENCE=2(stomach),1(skin),10(large_intestine),1(lung)	CLINSIG=pathogenic|pathogenic|pathogenic|pathogenic|pathogenic|pathogenic;CLNDBN=Noonan_syndrome_5|LEOPARD_syndrome_2|LEOPARD_syndrome|Rasopathy|Noonan's_syndrome|not_provided;CLNREVSTAT=criteria_provided\x2c_single_submitter|no_assertion_criteria_provided|no_assertion_criteria_provided|criteria_provided\x2c_single_submitter|no_assertion_criteria_provided|no_assertion_criteria_provided;CLNACC=RCV…	24.8	Lib6_242_4G1	4G1	No	293	19492	0.56	Yes	-	-	-	-	-	-	-	-	-	-	smMIP	-	-	0.271278	8822
2	57	Positive	RAF1	chr3	12645699	G	A	c.770C>T (p.S257L)	nonsynonymous SNV	0	0	rs80338796	ID=COSM181063,COSM3586964;OCCURENCE=2(stomach),1(skin),10(large_intestine),1(lung)	CLINSIG=pathogenic|pathogenic|pathogenic|pathogenic|pathogenic|pathogenic;CLNDBN=Noonan_syndrome_5|LEOPARD_syndrome_2|LEOPARD_syndrome|Rasopathy|Noonan's_syndrome|not_provided;CLNREVSTAT=criteria_provided\x2c_single_submitter|no_assertion_criteria_provided|no_assertion_criteria_provided|criteria_provided\x2c_single_submitter|no_assertion_criteria_provided|no_assertion_criteria_provided;CLNACC=RCV…	24.8	Lib2_176_4D12	4D12	No	293	19533	0.44	Yes	-	-	-	-	-	-	-	-	-	-	smMIP	-	-	0.306993	8768
3	58	Negative	BRAF	chr7	140453096	C	G	c.1839G>C (p.L613F)	nonsynonymous SNV	0	0	0	0	0	26.4	Lib14_93_4B17	4B17	No	393	22715	0.07	Yes	-	-	-	-	-	-	-	-	-	-	PCR	0.00175199	57078	-	-
3	58	Positive	BRAF	chr7	140453096	C	G	c.1839G>C (p.L613F)	nonsynonymous SNV	0	0	0	0	0	26.4	Lib13_89_4B13	4B13	No	393	27422	0.1	Yes	-	-	-	-	-	-	-	-	-	-	PCR	0.0754063	62329	-	-
3	59	Positive	MAP2K1	chr15	66727451	A	C	c.167A>C (p.Q56P)	nonsynonymous SNV	0	0	0	ID=COSM1235481;OCCURENCE=2(large_intestine),1(lung),4(stomach),1(haematopoietic_and_lymphoid_tissue)	0	25.5	Lib14_101_4B12	4B12	Yes	189	21935	0.068384	Yes	190	10363	0.028949	No	-	-	-	-	No	-	Inferred-same event	-	-	-	-
3	59	Positive	MAP2K1	chr15	66727451	A	C	c.167A>C (p.Q56P)	nonsynonymous SNV	0	0	0	ID=COSM1235481;OCCURENCE=2(large_intestine),1(lung),4(stomach),1(haematopoietic_and_lymphoid_tissue)	0	25.5	Lib14_104_4C6	4C6	Yes	189	37254	0.07516	Yes	190	16261	0.043048	No	-	-	-	-	No	-	PCR	0.0327322	122204	-	-
3	59	Positive	MAP2K1	chr15	66727451	A	C	c.167A>C (p.Q56P)	nonsynonymous SNV	0	0	0	ID=COSM1235481;OCCURENCE=2(large_intestine),1(lung),4(stomach),1(haematopoietic_and_lymphoid_tissue)	0	25.5	Lib2_171_4D7	4D7	Yes	189	56645	0.112984	Yes	190	7322	0.027315	No	-	-	-	-	No	-	PCR	0.0869947	109202	-	-
3	60	Positive	PTPN11	chr12	112888162	G	C	c.178G>C (p.G60R)	nonsynonymous SNV	0	0	0	ID=COSM13010;OCCURENCE=6(haematopoietic_and_lymphoid_tissue)	0	29.8	Lib9_11_1D21	1D21	No	148	18396	0.09	Yes	-	-	-	-	-	-	-	-	-	-	PCR	0.174385	15483	-	-
3	60	Positive	PTPN11	chr12	112888162	G	C	c.178G>C (p.G60R)	nonsynonymous SNV	0	0	0	ID=COSM13010;OCCURENCE=6(haematopoietic_and_lymphoid_tissue)	0	29.8	Lib9_12_1D22	1D22	No	148	20322	0.17	Yes	-	-	-	-	-	-	-	-	-	-	PCR	0.107901	8341	-	-
3	61	Positive	RAF1	chr3	12645688	G	C	c.781C>G (p.P261A)	nonsynonymous SNV	0	0	0	0	CLINSIG=pathogenic|pathogenic,pathogenic,pathogenic|pathogenic;CLNDBN=Noonan_syndrome_5|Rasopathy,Noonan_syndrome_5,Noonan_syndrome_5|Rasopathy;CLNREVSTAT=criteria_provided\x2c_single_submitter|criteria_provided\x2c_single_submitter,criteria_provided\x2c_multiple_submitters\x2c_no_conflicts,criteria_provided\x2c_single_submitter|no_assertion_criteria_provided;CLNACC=RCV000014987.25|RCV000159076.1…	24.7	Lib15_124_4D14	4D14	No	293	15697	0.15	Yes	-	-	-	-	-	-	-	-	-	-	PCR	0.11256	124782	-	-
3	61	Negative	RAF1	chr3	12645688	G	C	c.781C>G (p.P261A)	nonsynonymous SNV	0	0	0	0	CLINSIG=pathogenic|pathogenic,pathogenic,pathogenic|pathogenic;CLNDBN=Noonan_syndrome_5|Rasopathy,Noonan_syndrome_5,Noonan_syndrome_5|Rasopathy;CLNREVSTAT=criteria_provided\x2c_single_submitter|criteria_provided\x2c_single_submitter,criteria_provided\x2c_multiple_submitters\x2c_no_conflicts,criteria_provided\x2c_single_submitter|no_assertion_criteria_provided;CLNACC=RCV000014987.25|RCV000159076.1…	24.7	Lib1_160_4C22	4C22	No	293	30401	0.2	Yes	-	-	-	-	-	-	-	-	-	-	PCR	0	124782	-	-
3	61	NA	RAF1	chr3	12645688	G	C	c.781C>G (p.P261A)	nonsynonymous SNV	0	0	0	0	CLINSIG=pathogenic|pathogenic,pathogenic,pathogenic|pathogenic;CLNDBN=Noonan_syndrome_5|Rasopathy,Noonan_syndrome_5,Noonan_syndrome_5|Rasopathy;CLNREVSTAT=criteria_provided\x2c_single_submitter|criteria_provided\x2c_single_submitter,criteria_provided\x2c_multiple_submitters\x2c_no_conflicts,criteria_provided\x2c_single_submitter|no_assertion_criteria_provided;CLNACC=RCV000014987.25|RCV000159076.1…	24.7	Lib1_162_4C24	4C24	No	293	14883	0.19	Yes	-	-	-	-	-	-	-	-	-	-	not resequenced	-	-	-	-
1	NA	Negative	MAP2K2	chr19	4117383	C	G	.	intronic	0	0	0	0	0	2.8	Lib_16_144_5J27R	5J27R	No	241	12456	0.128	Yes	-	-	-	-	-	-	-	-	-	Yes	PCR	0.002	15814	-	-
1	NA	Negative	MAP2K2	chr19	4117383	C	G	.	intronic	0	0	0	0	0	2.8	Lib_13_85_5J27	5J27	No	241	18488	0.059	Yes	-	-	-	-	-	-	-	-	-	Yes	PCR	0.002	15814	-	-
1^	NA	Negative	MAP2K2	chr19	4117383	C	G	.	intronic	0	0	0	0	0	2.8	Lib_14_93_4B17	4B17	No	241	22955	0.0785	Yes	-	-	-	-	-	-	-	-	-	-	Inferred-same variant			-	-
2	NA	Negative	TGFBR2	chr3	30729984	G	T	c.1505G>T (p.S502I)	nonsynonymous SNV	0	0	0	0	0	31	Lib13_87_4B7	4B7	No	327	5041	0.71	Yes	-	-	-	-	-	-	-	-	-	-	Inferred-same variant	-	-	-	-
2	NA	Negative	NOTCH3	chr19	15303217	A	C	c.311T>G (p.F104C)	nonsynonymous SNV	0	0	0	0	0	25	Lib12_56_3D24A	3D24A	No	489	5239	0.31	Yes	-	-	-	-	-	-	-	-	-	-	Inferred-same variant	-	-	-	-
2	NA	Negative	NOTCH3	chr19	15303217	A	C	c.311T>G (p.F104C)	nonsynonymous SNV	0	0	0	0	0	25	Lib12_55_3D23A	3D23A	No	489	6727	0.25	Yes	-	-	-	-	-	-	-	-	-	-	Inferred-same variant	-	-	-	-
2	NA	Negative	MED12	chrX	70349047	C	A	c.3559C>A (p.P1187T)	nonsynonymous SNV	0	0	0	0	0	20.9	Lib14_108_4C3	4C3	No	477	6824	0.21	Yes	-	-	-	-	-	-	-	-	-	-	PCR	0.00502538	79598	-	-
2	NA	Negative	NOTCH3	chr19	15303217	A	C	c.311T>G (p.F104C)	nonsynonymous SNV	0	0	0	0	0	25	Lib12_69_5J5	5J5	No	489	6984	0.3	Yes	-	-	-	-	-	-	-	-	-	-	PCR	0	173300	-	-
2	NA	Negative	APC	chr5	112175173	G	A	c.3882G>A (p.Q1294Q)	synonymous SNV	0	0	0	0	0	0.435	Lib1_150_4C12	4C12	No	365	9406	0.28	Yes	-	-	-	-	-	-	-	-	-	-	PCR	0.007	37667	-	-
2	NA	Negative	MED12	chrX	70349047	C	A	c.3559C>A (p.P1187T)	nonsynonymous SNV	0	0	0	0	0	20.9	Lib5_230_4F15	4F15	No	477	9551	0.17	Yes	-	-	-	-	-	-	-	-	-	-	PCR	0.00350324	142725	-	-
2	NA	Negative	TGFBR2	chr3	30729984	G	T	c.1505G>T (p.S502I)	nonsynonymous SNV	0	0	0	0	0	31	Lib14_96_4B21	4B21	No	327	10461	1.21	Yes	-	-	-	-	-	-	-	-	-	-	PCR	0.02	124782	-	-
2	NA	Negative	TGFBR2	chr3	30729984	G	T	c.1505G>T (p.S502I)	nonsynonymous SNV	0	0	0	0	0	31	Lib13_88_4B9	4B9	No	327	10871	0.63	Yes	-	-	-	-	-	-	-	-	-	-	Inferred-same variant	-	-	-	-
2	NA	Negative	BRAF	chr7	140439679	T	G	c.2060A>C (p.K687T)	nonsynonymous SNV	0	0	0	0	0	28.3	Lib3_181_4D18	4D18	No	389	11330	0.19	Yes	-	-	-	-	-	-	-	-	-	-	PCR	0.085	10621	-	-
2	NA	Negative	TGFBR2	chr3	30729984	G	T	c.1505G>T (p.S502I)	nonsynonymous SNV	0	0	0	0	0	31	Lib13_90_4B14	4B14	No	327	11481	1.18	Yes	-	-	-	-	-	-	-	-	-	-	Inferred-same variant	-	-	-	-
2	NA	Negative	TGFBR2	chr3	30729984	G	T	c.1505G>T (p.S502I)	nonsynonymous SNV	0	0	0	0	0	31	Lib14_93_4B17	4B17	No	327	11903	0.84	Yes	-	-	-	-	-	-	-	-	-	-	Inferred-same variant	-	-	-	-
2	NA	Negative	PTPN11	chr12	112926884	T	A	c.1504T>A (p.S502T)	nonsynonymous SNV	0	0	rs121918458	ID=COSM14258;OCCURENCE=1(haematopoietic_and_lymphoid_tissue)	CLINSIG=pathogenic|pathogenic|pathogenic|pathogenic,pathogenic|pathogenic|pathogenic;CLNDBN=Noonan_syndrome_1|Rasopathy|Juvenile_myelomonocytic_leukemia|Noonan's_syndrome,Rasopathy|Juvenile_myelomonocytic_leukemia|Noonan_syndrome_1;CLNREVSTAT=criteria_provided\x2c_single_submitter|criteria_provided\x2c_single_submitter|no_assertion_criteria_provided|no_assertion_criteria_provided,criteria_provide…	29.7	Lib3_193_4D33	4D33	No	162	12101	0.28	Yes	-	-	-	-	-	-	-	-	-	-	smMIP	-	-	0.0282646	7072
2	NA	Negative	NOTCH3	chr19	15303217	A	C	c.311T>G (p.F104C)	nonsynonymous SNV	0	0	0	0	0	25	Lib11_52_3D20	3D20	No	489	12470	0.3	Yes	-	-	-	-	-	-	-	-	-	-	PCR	0.00100113	99887	-	-
2	NA	Negative	BRAF	chr7	140439679	T	G	c.2060A>C (p.K687T)	nonsynonymous SNV	0	0	0	0	0	28.3	Lib2_164_4C26	4C26	No	389	13912	0.22	Yes	-	-	-	-	-	-	-	-	-	-	PCR	0.03	9654	-	-
2	NA	Negative	APC	chr5	112175173	G	A	c.3882G>A (p.Q1294Q)	synonymous SNV	0	0	0	0	0	0.435	Lib2_176_4D12	4D12	No	365	14082	0.25	Yes	-	-	-	-	-	-	-	-	-	-	PCR	0.003	42783	-	-
2	NA	Positive - double nucleotide mutation	PTPN11	chr12	112926884	T	A	c.1504T>A (p.S502T)	nonsynonymous SNV	0	0	rs121918458	ID=COSM14258;OCCURENCE=1(haematopoietic_and_lymphoid_tissue)	CLINSIG=pathogenic|pathogenic|pathogenic|pathogenic,pathogenic|pathogenic|pathogenic;CLNDBN=Noonan_syndrome_1|Rasopathy|Juvenile_myelomonocytic_leukemia|Noonan's_syndrome,Rasopathy|Juvenile_myelomonocytic_leukemia|Noonan_syndrome_1;CLNREVSTAT=criteria_provided\x2c_single_submitter|criteria_provided\x2c_single_submitter|no_assertion_criteria_provided|no_assertion_criteria_provided,criteria_provide…	29.7	Lib15_126_4D25	4D25	No	162	15446	0.25	Yes	-	-	-	-	-	-	-	-	-	-	smMIP	-	-	0.341802	8742
2	NA	Negative	RHO	chr3	129251230	T	C	c.667T>C (p.Y223H)	nonsynonymous SNV	0	0	0	0	0	24.5	Lib_2_166_4C28	4C28	No	299	16945	0.401	Yes	-	-	-	-	-	-	-	-	-	-	PCR	0.01158	15209	-	-
2	NA	Negative	TP53	chr17	7576897	G	C	c.949C>G (p.Q317E)	nonsynonymous SNV	0	0	0	0	0	0.686	Lib1_156_4C18	4C18	No	218	17183	0.06	Yes	-	-	-	-	-	-	-	-	-	-	PCR	0.000837402	119417	-	-
2	NA	Negative	TP53	chr17	7576897	G	C	c.949C>G (p.Q317E)	nonsynonymous SNV	0	0	0	0	0	0.686	Lib2_178_4D15	4D15	No	218	17241	0.31	Yes	-	-	-	-	-	-	-	-	-	-	PCR	0.002151	139470	-	-
2	NA	Negative	RHO	chr3	129251230	T	C	c.667T>C (p.Y223H)	nonsynonymous SNV	0	0	0	0	0	24.5	Lib_5_218_4E23	4EE23	No	299	18024	0.62	Yes	-	-	-	-	-	-	-	-	-	-	Inferred-same event	-	-	-	-
2	NA	Negative	GAPDH	chr12	6646840	A	G	c.616A>G (p.I206V)	nonsynonymous SNV	4.081e-06	0	0	0	0	22.7	Lib10_32_2F30b	2F30b	No	184	25554	0.47	Yes	-	-	-	-	-	-	-	-	-	-	PCR	0.005	6010	-	-
2	NA	Negative	GAPDH	chr12	6646840	A	G	c.616A>G (p.I206V)	nonsynonymous SNV	4.081e-06	0	0	0	0	22.7	Lib10_31_2F30a	2F30a	No	184	29646	1.52	Yes	-	-	-	-	-	-	-	-	-	-	PCR	0.01	5427	-	-
3	NA	Negative	TP63	chr3	189582237	A	C	.	intronic	0	0	0	0	0	1.769	Lib1_148_4C9	4C9	No	320	8523	0.15	Yes	-	-	-	-	-	-	-	-	-	-	PCR	0.007	38861	-	-
3	NA	NA	BRAF	chr7	140476802	G	C	c.1604C>G (p.S535C)	nonsynonymous SNV	0	0	0	0	0	27.9	Lib2_165_4C27	4C27	No	395	8665	0.16	Yes	-	-	-	-	-	-	-	-	-	-	not resequenced	-	-	-	-
3	NA	Negative	NF1	chr17	29533271	G	C	c.1274G>C (p.W425S)	nonsynonymous SNV	0	0	0	0	0	28.9	Lib14_108_4C3	4C3	No	195	8915	0.12	Yes	-	-	-	-	-	-	-	-	-	-	PCR	0	83698	-	-
3	NA	NA	SOS1	chr2	39250064	T	G	c.1505A>C (p.N502T)	nonsynonymous SNV	0	0	0	0	0	14.31	Lib11_41_3D9	3D9	No	265	9716	0.13	Yes	-	-	-	-	-	-	-	-	-	-	not resequenced	-	-	-	-
3	NA	Negative	KRAS	chr12	25368532	A	C	.	intronic	0	0	0	0	0	15.02	Lib1_154_4C16	4C16	No	169	9924	0.14	Yes	-	-	-	-	-	-	-	-	-	-	PCR	0	44764.5	-	-
3	NA	NA	SOS1	chr2	39250064	T	G	c.1505A>C (p.N502T)	nonsynonymous SNV	0	0	0	0	0	14.31	Lib11_51_3D19	3D19	No	265	9952	0.16	Yes	-	-	-	-	-	-	-	-	-	-	not resequenced	-	-	-	-
3	NA	Negative	FGFR2	chr10	123324043	A	C	c.427T>G (p.F143V)	nonsynonymous SNV	0	0	0	0	0	13.25	Lib15_114_4G19	4G19	No	55	10811	0.13	Yes	-	-	-	-	-	-	-	-	-	-	PCR	0.000565601	176803	-	-
3	NA	Negative	PTEN	chr10	89720716	A	T	c.867A>T (p.K289N)	nonsynonymous SNV	0	0	0	0	0	19.94	Lib1_162_4C24	4C24	No	91	10844	0.11	Yes	-	-	-	-	-	-	-	-	-	-	PCR	0.00319173	31331	-	-
3	NA	Negative	FGFR2	chr10	123324043	A	C	c.427T>G (p.F143V)	nonsynonymous SNV	0	0	0	0	0	13.25	Lib15_113_4G15	4G15	No	55	11019	0.12	Yes	-	-	-	-	-	-	-	-	-	-	PCR	0.000715369	139788	-	-
3	NA	Negative	KRAS	chr12	25368532	A	C	.	intronic	0	0	0	0	0	15.02	Lib2_178_4D15	4D15	No	169	11895	0.09	Yes	-	-	-	-	-	-	-	-	-	-	PCR	0	29812.5	-	-
3	NA	Negative	MDH1	chr2	63816228	T	G	.	intronic	0	0	0	0	0	6.224	Lib2_180_4D17	4D17	No	276	11898	0.1	Yes	-	-	-	-	-	-	-	-	-	-	PCR	0.002	94454	-	-
3	NA	Negative	SOS1	chr2	39285879	T	G	c.280A>C (p.I94L)	nonsynonymous SNV	0	0	0	0	0	17.56	Lib16_144_5J27R	5J27R	No	275	12746	0.13	Yes	-	-	-	-	-	-	-	-	-	No	PCR	0	29775	-	-
3	NA	NA	BRAF	chr7	140476802	G	C	c.1604C>G (p.S535C)	nonsynonymous SNV	0	0	0	0	0	27.9	Lib16_133_4D4R	4D4R	No	395	12935	0.09	Yes	-	-	-	-	-	-	-	-	-	No	not resequenced	-	-	-	-
3	NA	Negative	SOS1	chr2	39285879	T	G	c.280A>C (p.I94L)	nonsynonymous SNV	0	0	0	0	0	17.56	Lib15_111_4G6	4G6	No	275	13379	0.08	Yes	-	-	-	-	-	-	-	-	-	-	PCR	0.00367094	27241	-	-
3	NA	Negative	TP63	chr3	189582237	A	C	.	intronic	0	0	0	0	0	1.769	Lib2_171_4D7	4D7	No	320	13857	0.14	Yes	-	-	-	-	-	-	-	-	-	-	PCR	0.001	147659	-	-
3	NA	NA	SOS1	chr2	39262566	G	T	c.940C>A (p.Q314K)	nonsynonymous SNV	0	0	0	0	0	26.9	Lib16_134_4D10R	4D10R	No	272	13880	0.1	Yes	-	-	-	-	-	-	-	-	-	No	not resequenced	-	-	-	-
3	NA	Negative	ALK	chr2	29432719	A	C	c.3769T>G (p.L1257V)	nonsynonymous SNV	0	0	0	0	0	23.2	Lib3_196_4D36	4D36	No	253	14158	0.19	Yes	-	-	-	-	-	-	-	-	-	-	PCR	0.00411222	97271	-	-
3	NA	Negative	NOTCH1	chr9	139399372	G	C	c.4771C>G (p.H1591D)	nonsynonymous SNV	0	0	0	0	0	6.834	Lib9_12_1D22	1D22	No	462	14182	0.11	Yes	-	-	-	-	-	-	-	-	-	-	PCR	0	9354	-	-
3	NA	NA	SOS1	chr2	39262566	G	T	c.940C>A (p.Q314K)	nonsynonymous SNV	0	0	0	0	0	26.9	Lib6_240_4F27	4F27	No	272	14743	0.2	Yes	-	-	-	-	-	-	-	-	-	-	not resequenced	-	-	-	-
3	NA	Negative	CSF1R	chr5	149434815	A	C	c.2639T>G (p.F880C)	nonsynonymous SNV	0	0	0	0	0	27.1	Lib8_288_2F16	2F16	No	376	15264	0.1	Yes	-	-	-	-	-	-	-	-	-	-	PCR	0	52269	-	-
3	NA	Negative	PTEN	chr10	89720716	A	T	c.867A>T (p.K289N)	nonsynonymous SNV	0	0	0	0	0	19.94	Lib1_147_4C7	4C7	No	91	16413	0.18	Yes	-	-	-	-	-	-	-	-	-	-	PCR	0	52134	-	-
3	NA	NA	BFSP2	chr3	133118979	A	C	c.52A>C (p.M18L)	nonsynonymous SNV	0	0	0	0	0	21.8	Lib5_217_4EE22	4EE22	No	301	16624	0.08	Yes	-	-	-	-	-	-	-	-	-	-	not resequenced	-	-	-	-
3	NA	Negative	CSF1R	chr5	149434815	A	C	c.2639T>G (p.F880C)	nonsynonymous SNV	0	0	0	0	0	27.1	Lib10_31_2F30a	2F30a	No	376	16958	0.06	Yes	-	-	-	-	-	-	-	-	-	-	PCR	0	80689	-	-
3	NA	Negative	ZBTB16	chr11	113934757	G	C	c.735G>C (p.M245I)	nonsynonymous SNV	0	0	0	0	0	10.91	Lib13_83_5J25	5J25	No	102	17148	0.1	Yes	-	-	-	-	-	-	-	-	-	No	Inferred-same variant	-	-	-	-
3	NA	Negative	NF1	chr17	29533271	G	C	c.1274G>C (p.W425S)	nonsynonymous SNV	0	0	0	0	0	28.9	Lib3_182_4D19	4D19	No	195	18053	0.07	Yes	-	-	-	-	-	-	-	-	-	-	PCR	0	117772	-	-
3	NA	Negative	ALK	chr2	29432719	A	C	c.3769T>G (p.L1257V)	nonsynonymous SNV	0	0	0	0	0	23.2	Lib1_160_4C22	4C22	No	253	18563	0.1	Yes	-	-	-	-	-	-	-	-	-	-	PCR	0.00290685	68803	-	-
3	NA	NA	TP53	chr17	7577144	A	C	c.794T>G (p.L265R)	nonsynonymous SNV	0	0	0	ID=COSM437485,COSM3970345,COSM3970346,COSM44092;OCCURENCE=1(stomach),1(breast),1(central_nervous_system),1(oesophagus),1(large_intestine)	0	28.5	Lib16_138_3D13R	3D13R	No	220	19024	0.12	Yes	-	-	-	-	-	-	-	-	-	No	not resequenced	-	-	-	-
3	NA	Negative	MDH1	chr2	63816228	T	G	.	intronic	0	0	0	0	0	6.224	Lib3_186_4D24	4D24	No	276	19520	0.06	Yes	-	-	-	-	-	-	-	-	-	-	PCR	0.008	68809	-	-
3	NA	Negative	ZBTB16	chr11	113934757	G	C	c.735G>C (p.M245I)	nonsynonymous SNV	0	0	0	0	0	10.91	Lib13_74_5J12	5J12	No	102	19575	0.13	Yes	-	-	-	-	-	-	-	-	-	-	PCR	0.000703443	142158	-	-
3	NA	Negative	NOTCH1	chr9	139399372	G	C	c.4771C>G (p.H1591D)	nonsynonymous SNV	0	0	0	0	0	6.834	Lib9_4_1D15b	1D15b	No	462	19780	0.16	Yes	-	-	-	-	-	-	-	-	-	-	PCR	0	26705	-	-
3	NA	Negative	SOS1	chr2	39285879	T	G	c.280A>C (p.I94L)	nonsynonymous SNV	0	0	0	0	0	17.56	Lib1_147_4C7	4C7	No	275	20080	0.09	Yes	-	-	-	-	-	-	-	-	-	-	PCR	0	26182	-	-
3	NA	Negative	TP53	chr17	7577502	G	T	c.779C>A (p.S260Y)	nonsynonymous SNV	0	0	0	ID=COSM44401;OCCURENCE=1(oesophagus),1(cervix)	0	23.5	Lib8_280_2F8	2F8	No	221	20370	0.13	Yes	-	-	-	-	-	-	-	-	-	-	PCR	0.009887	30344	-	-
3	NA	Negative	TP53	chr17	7577502	G	T	c.779C>A (p.S260Y)	nonsynonymous SNV	0	0	0	ID=COSM44401;OCCURENCE=1(oesophagus),1(cervix)	0	23.5	Lib10_22_2F2	2F2	No	221	20877	0.11	Yes	-	-	-	-	-	-	-	-	-	-	PCR	0.00772439	25892	-	-
3	NA	NA	TP53	chr17	7577144	A	C	c.794T>G (p.L265R)	nonsynonymous SNV	0	0	0	ID=COSM437485,COSM3970345,COSM3970346,COSM44092;OCCURENCE=1(stomach),1(breast),1(central_nervous_system),1(oesophagus),1(large_intestine)	0	28.5	Lib11_54_3D22	3D22	No	220	21162	0.15	Yes	-	-	-	-	-	-	-	-	-	-	not resequenced	-	-	-	-
3	NA	NA	BFSP2	chr3	133118979	A	C	c.52A>C (p.M18L)	nonsynonymous SNV	0	0	0	0	0	21.8	Lib3_185_4D22	4D22	No	301	21534	0.12	Yes	-	-	-	-	-	-	-	-	-	-	not resequenced	-	-	-	-
3	NA	Negative	ZBTB16	chr11	113934757	G	C	c.735G>C (p.M245I)	nonsynonymous SNV	0	0	0	0	0	10.91	Lib13_75_5J16	5J16	No	102	21814	0.14	Yes	-	-	-	-	-	-	-	-	-	-	PCR	0	153630	-	-
3	NA	Negative	ZBTB16	chr11	113934757	G	C	c.735G>C (p.M245I)	nonsynonymous SNV	0	0	0	0	0	10.91	Lib13_78_5J19	5J19	No	102	21905	0.12	Yes	-	-	-	-	-	-	-	-	-	-	Inferred-same variant	-	-	-	-
3	NA	Negative	TP53	chr17	7576940	A	C	.	splicing	0	0	0	0	0	10.41	Lib5_219_4EE24	4EE24	No	218	21919	0.11	Yes	-	-	-	-	-	-	-	-	-	-	PCR	0.006	123829	-	-
3	NA	Negative	ZBTB16	chr11	113934757	G	C	c.735G>C (p.M245I)	nonsynonymous SNV	0	0	0	0	0	10.91	Lib15_111_4G6	4G6	No	102	22046	0.1	Yes	-	-	-	-	-	-	-	-	-	-	Inferred-same variant	-	-	-	-
3	NA	Negative	ZBTB16	chr11	113934759	T	G	c.737T>G (p.M246R)	nonsynonymous SNV	0	0	0	0	0	23.4	Lib15_111_4G6	4G6	No	102	22046	0.62	Yes	-	-	-	-	-	-	-	-	-	-	PCR	0.00132573	75430	-	-
3	NA	NA	TP53	chr17	7578490	A	C	c.440T>G (p.V147G)	nonsynonymous SNV	0	0	0	ID=COSM1644287,COSM1644285,COSM1644288,COSM1644284,COSM1644286,COSM44309;OCCURENCE=1(large_intestine),2(haematopoietic_and_lymphoid_tissue),1(breast),3(biliary_tract),1(stomach),1(urinary_tract)	0	25.5	Lib5_222_4F4	4F4	No	225	22532	0.15	Yes	-	-	-	-	-	-	-	-	-	-	not resequenced	-	-	-	-
3	NA	Negative	ABL1	chr9	133730317	A	T	c.440A>T (p.Y147F)	nonsynonymous SNV	0	0	0	0	0	24.8	Lib1_152_4C14	4C14	No	447	25545	0.1	Yes	-	-	-	-	-	-	-	-	-	-	PCR	0.000573868	174256	-	-
3	NA	Negative	ZBTB16	chr11	113934757	G	C	c.735G>C (p.M245I)	nonsynonymous SNV	0	0	0	0	0	10.91	Lib13_73_5J11	5J11	No	102	26544	0.09	Yes	-	-	-	-	-	-	-	-	-	-	Inferred-same variant	-	-	-	-
3	NA	Negative	TP53	chr17	7576940	A	C	.	splicing	0	0	0	0	0	10.41	Lib6_237_4F24	4F24	No	218	27326	0.12	Yes	-	-	-	-	-	-	-	-	-	-	PCR	0.004	135123	-	-
3	NA	Negative	ZBTB16	chr11	114027124	T	A	c.1334T>A (p.L445X)	stopgain	0	0	0	0	0	44	Lib3_196_4D36	4D36	No	108	29972	0.1	Yes	-	-	-	-	-	-	-	-	-	-	PCR	0.00789173	25343	-	-
3	NA	Negative	ZBTB16	chr11	113934759	T	G	c.737T>G (p.M246R)	nonsynonymous SNV	0	0	0	0	0	23.4	Lib2_165_4C27	4C27	No	102	31530	0.46	Yes	-	-	-	-	-	-	-	-	-	-	Inferred-same variant	-	-	-	-
3	NA	NA	TP53	chr17	7578490	A	C	c.440T>G (p.V147G)	nonsynonymous SNV	0	0	0	ID=COSM1644287,COSM1644285,COSM1644288,COSM1644284,COSM1644286,COSM44309;OCCURENCE=1(large_intestine),2(haematopoietic_and_lymphoid_tissue),1(breast),3(biliary_tract),1(stomach),1(urinary_tract)	0	25.5	Lib4_214_4EE19	4EE19	No	225	32307	0.11	Yes	-	-	-	-	-	-	-	-	-	-	not resequenced	-	-	-	-
3	NA	Negative	ZBTB16	chr11	114027124	T	A	c.1334T>A (p.L445X)	stopgain	0	0	0	0	0	44	Lib4_205_4EE10	4EE10	No	108	35567	0.08	Yes	-	-	-	-	-	-	-	-	-	-	PCR	0.00361899	27632	-	-
3	NA	Negative	ABL1	chr9	133730317	A	T	c.440A>T (p.Y147F)	nonsynonymous SNV	0	0	0	0	0	24.8	Lib3_186_4D24	4D24	No	447	37530	0.1	Yes	-	-	-	-	-	-	-	-	-	-	PCR	0.00471288	148529	-	-
3	NA	NA	ERBB2	chr17	37881422	A	C	c.2569A>C (p.I857L)	nonsynonymous SNV	0	0	0	0	0	24.3	Lib2_180_4D17	4D17	No	213	44130	0.07	Yes	-	-	-	-	-	-	-	-	-	-	not resequenced	-	-	-	-
3	NA	NA	ERBB2	chr17	37881422	A	C	c.2569A>C (p.I857L)	nonsynonymous SNV	0	0	0	0	0	24.3	Lib3_181_4D18	4D18	No	213	62775	0.17	Yes	-	-	-	-	-	-	-	-	-	-	not resequenced	-	-	-	-
4	NA	NA	PIK3CA	chr3	178941885	T	G	c.2204T>G (p.L735X)	stopgain	0	0	0	0	0	43	Lib16_144_5J27R	5J27R	No	314	12994	0.09	Yes	-	-	-	-	-	-	-	-	-	No	not resequenced	-	-	-	-
4	NA	NA	FGFR1	chr8	38275490	G	C	c.1444C>G (p.L482V)	nonsynonymous SNV	0	0	0	0	0	27.2	Lib3_193_4D33	4D33	No	433	13983	0.09	Yes	-	-	-	-	-	-	-	-	-	-	not resequenced	-	-	-	-
4	NA	NA	RET	chr10	43610089	C	G	c.2041C>G (p.Q681E)	nonsynonymous SNV	1.629e-05	0	0	0	0	23.1	Lib14_108_4C3	4C3	No	59	15031	0.09	Yes	-	-	-	-	-	-	-	-	-	-	not resequenced	-	-	-	-
4	NA	NA	NOTCH2	chr1	120510852	A	C	c.1112T>G (p.L371R)	nonsynonymous SNV	0	0	0	0	0	25.6	Lib4_208_4EE13	4EE13	No	22	15457	0.07	Yes	-	-	-	-	-	-	-	-	-	-	not resequenced	-	-	-	-
4	NA	NA	PIK3CA	chr3	178941885	T	G	c.2204T>G (p.L735X)	stopgain	0	0	0	0	0	43	Lib15_121_5J21	5J21	No	314	15486	0.08	Yes	-	-	-	-	-	-	-	-	-	-	not resequenced	-	-	-	-
4	NA	NA	BRAF	chr7	140482986	A	C	.	intronic	0	0	0	0	0	6.732	Lib5_217_4EE22	4EE22	No	401	16817	0.08	Yes	-	-	-	-	-	-	-	-	-	-	not resequenced	-	-	-	-
4	NA	NA	GAPDH	chr12	6645897	C	G	c.177C>G (p.T59T)	synonymous SNV	0	0	0	0	0	11.44	Lib2_179_4D16	4D16	No	182	17339	0.07	Yes	-	-	-	-	-	-	-	-	-	-	not resequenced	-	-	-	-
4	NA	NA	ATP1A3	chr19	42474682	A	C	c.2276T>G (p.F759C)	nonsynonymous SNV	0	0	0	0	0	27.5	Lib3_195_4D35	4D35	No	491	17764	0.09	Yes	-	-	-	-	-	-	-	-	-	-	not resequenced	-	-	-	-
4	NA	NA	RAF1	chr3	12645662	G	C	c.807C>G (p.T269T)	synonymous SNV	0	0	rs1063664	0	0	0.566	Lib8_286_2F13	2F13	No	293	17772	0.06	Yes	-	-	-	-	-	-	-	-	-	-	not resequenced	-	-	-	-
4	NA	NA	RET	chr10	43610089	C	G	c.2041C>G (p.Q681E)	nonsynonymous SNV	1.629e-05	0	0	0	0	23.1	Lib14_106_4C11	4C11	No	59	18586	0.07	Yes	-	-	-	-	-	-	-	-	-	-	not resequenced	-	-	-	-
4	NA	NA	CBL	chr11	119149260	T	A	c.1268T>A (p.I423N)	nonsynonymous SNV	0	0	0	0	0	26.1	Lib9_8_1D18	1D18	No	124	20139	0.07	Yes	-	-	-	-	-	-	-	-	-	-	not resequenced	-	-	-	-
4	NA	NA	AKT3	chr1	243668564	C	G	c.1427G>C (p.S476T)	nonsynonymous SNV	0	0	0	0	0	28.6	Lib6_241_4F28	4F28	No	24	20422	0.07	Yes	-	-	-	-	-	-	-	-	-	-	not resequenced	-	-	-	-
4	NA	NA	CBL	chr11	119149260	T	A	c.1268T>A (p.I423N)	nonsynonymous SNV	0	0	0	0	0	26.1	Lib7_262_1D5	1D5	No	124	20685	0.06	Yes	-	-	-	-	-	-	-	-	-	-	not resequenced	-	-	-	-
4	NA	NA	RPL13A	chr19	49993814	C	G	c.237C>G (p.I79M)	nonsynonymous SNV	0	0	rs11539130	0	0	23.3	Lib3_190_4D30	4D30	No	243	21206	0.08	Yes	-	-	-	-	-	-	-	-	-	-	not resequenced	-	-	-	-
4	NA	NA	GAPDH	chr12	6645897	C	G	c.177C>G (p.T59T)	synonymous SNV	0	0	0	0	0	11.44	Lib14_92_4B16	4B16	No	182	21561	0.06	Yes	-	-	-	-	-	-	-	-	-	-	not resequenced	-	-	-	-
4	NA	NA	FGFR1	chr8	38275490	G	C	c.1444C>G (p.L482V)	nonsynonymous SNV	0	0	0	0	0	27.2	Lib4_213_4EE18	4EE18	No	433	22267	0.05	Yes	-	-	-	-	-	-	-	-	-	-	not resequenced	-	-	-	-
4	NA	NA	CBL	chr11	119149260	T	A	c.1268T>A (p.I423N)	nonsynonymous SNV	0	0	0	0	0	26.1	Lib7_265_1D8	1D8	No	124	22663	0.07	Yes	-	-	-	-	-	-	-	-	-	-	not resequenced	-	-	-	-
4	NA	NA	RAF1	chr3	12645662	G	C	c.807C>G (p.T269T)	synonymous SNV	0	0	rs1063664	0	0	0.566	Lib10_22_2F2	2F2	No	293	23348	0.05	Yes	-	-	-	-	-	-	-	-	-	-	not resequenced	-	-	-	-
4	NA	NA	MET	chr7	116340333	A	C	c.1195A>C (p.N399H)	nonsynonymous SNV	0	0	0	0	0	24.3	Lib15_122_4D3	4D3	No	384	23443	0.06	Yes	-	-	-	-	-	-	-	-	-	-	not resequenced	-	-	-	-
4	NA	NA	NOTCH2	chr1	120510087	C	A	c.1422G>T (p.K474N)	nonsynonymous SNV	0	0	0	0	0	27	Lib15_114_4G19	4G19	No	19	24853	0.05	Yes	-	-	-	-	-	-	-	-	-	-	not resequenced	-	-	-	-
4	NA	NA	NOTCH2	chr1	120510197	C	G	c.1312G>C (p.G438R)	nonsynonymous SNV	0	0	0	0	0	27.6	Lib9_12_1D22	1D22	No	20	25114	0.05	Yes	-	-	-	-	-	-	-	-	-	-	not resequenced	-	-	-	-
4	NA	NA	MET	chr7	116340333	A	C	c.1195A>C (p.N399H)	nonsynonymous SNV	0	0	0	0	0	24.3	Lib10_33_3D1	3D1	No	384	25360	0.06	Yes	-	-	-	-	-	-	-	-	-	-	not resequenced	-	-	-	-
4	NA	NA	RPL13A	chr19	49993814	C	G	c.237C>G (p.I79M)	nonsynonymous SNV	0	0	rs11539130	0	0	23.3	Lib2_163_4C25	4C25	No	243	25756	0.05	Yes	-	-	-	-	-	-	-	-	-	-	not resequenced	-	-	-	-
4	NA	NA	NOTCH2	chr1	120510197	C	G	c.1312G>C (p.G438R)	nonsynonymous SNV	0	0	0	0	0	27.6	Lib3_196_4D36	4D36	No	20	25792	0.04	Yes	-	-	-	-	-	-	-	-	-	-	not resequenced	-	-	-	-
4	NA	NA	NOTCH2	chr1	120510852	A	C	c.1112T>G (p.L371R)	nonsynonymous SNV	0	0	0	0	0	25.6	Lib4_203_4EE8	4EE8	No	22	26406	0.08	Yes	-	-	-	-	-	-	-	-	-	-	not resequenced	-	-	-	-
4	NA	NA	EGFR	chr7	55249124	A	C	c.2422A>C (p.N808H)	nonsynonymous SNV	0	0	0	0	0	23.6	Lib13_74_5J12	5J12	No	420	26501	0.06	Yes	-	-	-	-	-	-	-	-	-	-	not resequenced	-	-	-	-
4	NA	NA	EZH2	chr7	148506475	C	G	c.2037G>C (p.V679V)	synonymous SNV	0	0	0	0	0	12.09	Lib3_187_4D26	4D26	No	412	27090	0.05	Yes	-	-	-	-	-	-	-	-	-	-	not resequenced	-	-	-	-
4	NA	NA	AKT3	chr1	243668564	C	G	c.1427G>C (p.S476T)	nonsynonymous SNV	0	0	0	0	0	28.6	Lib1_145_4C4	4C4	No	24	27521	0.06	Yes	-	-	-	-	-	-	-	-	-	-	not resequenced	-	-	-	-
4	NA	NA	ATP1A3	chr19	42474682	A	C	c.2276T>G (p.F759C)	nonsynonymous SNV	0	0	0	0	0	27.5	Lib16_127_4D27	4D27	No	491	27593	0.07	Yes	-	-	-	-	-	-	-	-	-	-	not resequenced	-	-	-	-
4	NA	NA	BRAF	chr7	140482986	A	C	.	intronic	0	0	0	0	0	6.732	Lib6_235_4F20	4F20	No	401	28883	0.07	Yes	-	-	-	-	-	-	-	-	-	-	not resequenced	-	-	-	-
4	NA	NA	NOTCH2	chr1	120510197	C	G	c.1312G>C (p.G438R)	nonsynonymous SNV	0	0	0	0	0	27.6	Lib16_127_4D27	4D27	No	20	29039	0.04	Yes	-	-	-	-	-	-	-	-	-	-	not resequenced	-	-	-	-
4	NA	NA	EGFR	chr7	55249124	A	C	c.2422A>C (p.N808H)	nonsynonymous SNV	0	0	0	0	0	23.6	Lib13_75_5J16	5J16	No	420	29643	0.08	Yes	-	-	-	-	-	-	-	-	-	-	not resequenced	-	-	-	-
4	NA	NA	NOTCH2	chr1	120458186	G	C	c.7159C>G (p.P2387A)	nonsynonymous SNV	4.065e-06	0	0	0	0	24.7	Lib5_220_4EE25	4EE25	No	11	30540	0.05	Yes	-	-	-	-	-	-	-	-	-	-	not resequenced	-	-	-	-
4	NA	NA	MET	chr7	116340333	A	C	c.1195A>C (p.N399H)	nonsynonymous SNV	0	0	0	0	0	24.3	Lib15_109_4F21	4F21	No	384	32538	0.06	Yes	-	-	-	-	-	-	-	-	-	-	not resequenced	-	-	-	-
4	NA	NA	NOTCH2	chr1	120458186	G	C	c.7159C>G (p.P2387A)	nonsynonymous SNV	4.065e-06	0	0	0	0	24.7	Lib14_91_4B15	4B15	No	11	32569	0.05	Yes	-	-	-	-	-	-	-	-	-	-	not resequenced	-	-	-	-
4	NA	NA	GAPDH	chr12	6646310	C	G	c.371C>G (p.P124R)	nonsynonymous SNV	0	0	0	0	0	24	Lib1_162_4C24	4C24	No	183	32651	0.04	Yes	-	-	-	-	-	-	-	-	-	-	not resequenced	-	-	-	-
4	NA	NA	NOTCH2	chr1	120458731	T	G	c.6614A>C (p.H2205P)	nonsynonymous SNV	0	0	0	0	0	7.685	Lib3_196_4D36	4D36	No	16	33003	0.08	Yes	-	-	-	-	-	-	-	-	-	-	not resequenced	-	-	-	-
4	NA	NA	EZH2	chr7	148506475	C	G	c.2037G>C (p.V679V)	synonymous SNV	0	0	0	0	0	12.09	Lib2_172_4D8	4D8	No	412	34086	0.06	Yes	-	-	-	-	-	-	-	-	-	-	not resequenced	-	-	-	-
4	NA	NA	RPL13A	chr19	49993814	C	G	c.237C>G (p.I79M)	nonsynonymous SNV	0	0	rs11539130	0	0	23.3	Lib4_200_4EE5	4EE5	No	243	36129	0.04	Yes	-	-	-	-	-	-	-	-	-	-	not resequenced	-	-	-	-
4	NA	NA	NOTCH2	chr1	120510087	C	A	c.1422G>T (p.K474N)	nonsynonymous SNV	0	0	0	0	0	27	Lib3_190_4D30	4D30	No	19	37042	0.05	Yes	-	-	-	-	-	-	-	-	-	-	not resequenced	-	-	-	-
4	NA	NA	NOTCH2	chr1	120458731	T	G	c.6614A>C (p.H2205P)	nonsynonymous SNV	0	0	0	0	0	7.685	Lib3_185_4D22	4D22	No	16	45492	0.09	Yes	-	-	-	-	-	-	-	-	-	-	not resequenced	-	-	-	-
4	NA	NA	GAPDH	chr12	6646310	C	G	c.371C>G (p.P124R)	nonsynonymous SNV	0	0	0	0	0	24	Lib5_221_4F1	4F1	No	183	51486	0.08	Yes	-	-	-	-	-	-	-	-	-	-	not resequenced	-	-	-	-
3	NA	Negative	ZBTB16	chr11	113935088	C	G	c.1066C>G (p.L356V)	nonsynonymous SNV	0	0	0	0	0	17.66	Lib3_198_4EE2	4EE2	Yes	105	10839	0.101485	Yes	106	18519	0.021599	No	-	-	-	-	No	-	PCR	0.00106547	93855	-	-
3	NA	Negative	ZBTB16	chr11	113935088	C	G	c.1066C>G (p.L356V)	nonsynonymous SNV	0	0	0	0	0	17.66	Lib3_196_4D36	4D36	Yes	105	13931	0.107674	Yes	106	22376	0.017876	No	-	-	-	-	No	-	PCR	0	87236	-	-
3	NA	Negative	FGFR1	chr8	38285567	A	C	c.487T>G (p.L163V)	nonsynonymous SNV	0	0	0	0	0	18.67	Lib15_124_4D14	4D14	Yes	443	17635	0.096399	Yes	444	30183	0.006626	No	-	-	-	-	No	-	PCR	0	56013	-	-
3	NA	Negative	FGFR1	chr8	38285567	A	C	c.487T>G (p.L163V)	nonsynonymous SNV	0	0	0	0	0	18.67	Lib2_170_4D5	4D5	Yes	443	19782	0.161763	Yes	444	32890	0.06689	No	-	-	-	-	No	-	PCR	0.00828683	72404	-	-
4	NA	NA	HRAS	chr11	534286	C	G	c.37G>C (p.G13R)	nonsynonymous SNV	0	0	rs104894228	ID=COSM486,COSM99938;OCCURENCE=2(lung),3(prostate),12(salivary_gland),269(skin),1(breast),7(soft_tissue),16(urinary_tract),20(thyroid),14(upper_aerodigestive_tract),1(vulva),1(autonomic_ganglia),5(adrenal_gland)	CLINSIG=pathogenic|pathogenic,pathogenic|pathogenic|pathogenic;CLNDBN=Costello_syndrome|Rasopathy,Nevus_sebaceous|Epidermal_nevus_syndrome|Epidermal_nevus;CLNREVSTAT=criteria_provided\x2c_single_submitter|criteria_provided\x2c_single_submitter,no_assertion_criteria_provided|no_assertion_criteria_provided|no_assertion_criteria_provided;CLNACC=RCV000013440.25|RCV000149831.2,RCV000029212.4|RCV000029…	26.6	Lib8_282_2F10	2F10	Yes	132	15311	0.091438	Yes	133	2792	0.071633	No	-	-	-	-	No	-	not resequenced	-	-	-	-
4	NA	NA	HRAS	chr11	534286	C	G	c.37G>C (p.G13R)	nonsynonymous SNV	0	0	rs104894228	ID=COSM486,COSM99938;OCCURENCE=2(lung),3(prostate),12(salivary_gland),269(skin),1(breast),7(soft_tissue),16(urinary_tract),20(thyroid),14(upper_aerodigestive_tract),1(vulva),1(autonomic_ganglia),5(adrenal_gland)	CLINSIG=pathogenic|pathogenic,pathogenic|pathogenic|pathogenic;CLNDBN=Costello_syndrome|Rasopathy,Nevus_sebaceous|Epidermal_nevus_syndrome|Epidermal_nevus;CLNREVSTAT=criteria_provided\x2c_single_submitter|criteria_provided\x2c_single_submitter,no_assertion_criteria_provided|no_assertion_criteria_provided|no_assertion_criteria_provided;CLNACC=RCV000013440.25|RCV000149831.2,RCV000029212.4|RCV000029…	26.6	Lib10_23_2F3	2F3	Yes	132	15595	0.08336	Yes	133	3035	0	No	-	-	-	-	No	-	not resequenced	-	-	-	-
