# Supplementary material for: Selfish mutations dysregulating RAS-MAPK signaling are pervasive in aged human testes
Source: Genome Res. 2018 Dec;28(12):1779–90. doi: 10.1101/gr.239186.118 (PMC6280762; doi:10.1101/gr.239186.118)
Supplement: Supplemental Material [file supp_gr.239186.118_Supplemental_Table_S4.xlsx]

## Sheet: Legend
Supplemental Table S4. Variant calls in replicate samples
Legend
Column	Description	Annotation	Description
A-G	Variant location and annotation
H	Library and biopsy ID	Library number_sample number_biopsy ID
I	Biopsy ID	R = second replicate
J	Details if position covered by >1 amplicon
K-M	Amplicon number, variant coverage, VAF and calling status for first amplicon
O-R	Amplicon number, variant coverage, VAF and calling status for second amplicon (if relevant)
S	Details if variant was called in >1 amplicon
T	Details if variant was called in both sample replicates
U	Variant tier	1	Replicated call (called in >1 amplicon or in biopsy replicate)
		1^	Same variant was replicated in another biopsy, but not this specific biopsy
		2	Called in a single amplicon, VAF ≧0.2%
		3	Called in a single amplicon, VAF 0.1-0.19%
		4	Called in a single amplicon, VAF <0.1%
V	Variant number (validated variants only)
W	Validation result
X	Validation method	PCR	Validated by PCR
		Inferred-same event	Same variant validated in same testis
		Replicate	Called in sample replicates (Tier1 variant)
		Inferred-same variant	Same variant validated in different testis
		smMIP	Validated by smMIP
		PCR & smMIP	Validated by PCR and smMIP
		not resequenced	Variant was not resequenced

## Sheet: Calls in replicated samples
Gene	Chromosome	Position (hg19)	Ref	Alt	Variant	ExonicFunc	Library & Sample ID	Biopsy ID (R = second replicate)	OverlappingAmplicons	1st amplicon ID	Coverage (1st amplicon)	VAF (%) (1st amplicon)	Called? (1st amplicon)	2nd amplicon ID	Coverage (2nd amplicon)	VAF (%) (2nd amplicon)	Called? (2nd amplicon)	Replicated in another amplicon?	Called in sample replicate?	Inclusion tier	Variant number (validated variants only)	Validation result	Validation method
Replicated calls
AKT3	chr1	243668575	G	C	c.1416C>G (p.S472S)	synonymous SNV	Lib_3_188_4D28	4D28	No	24	26319	0.0797903	Yes	-	-	-	-	-	Yes	1	1	Positive	PCR
AKT3	chr1	243668575	G	C	c.1416C>G (p.S472S)	synonymous SNV	Lib_16_136_4D28R	4D28R	No	24	25165	0.0993443	Yes	-	-	-	-	-	Yes	1	1	Positive	PCR
BRAF	chr7	140439614	G	T	c.2125C>A (p.Q709K)	nonsynonymous SNV	Lib_3_188_4D28	4D28	No	389	16269	0.34	Yes	-	-	-	-	-	Yes	1	6	Positive	Replicate
BRAF	chr7	140439614	G	T	c.2125C>A (p.Q709K)	nonsynonymous SNV	Lib_16_136_4D28R	4D28R	No	389	13567	0.18	Yes	-	-	-	-	-	Yes	1	6	Positive	Replicate
BRAF	chr7	140481402	C	G	c.1406G>C (p.G469A)	nonsynonymous SNV	Lib_2_169_4D4	4D4	Yes	398	828	0.040877	No	399	16447	0.145923	Yes	No	Yes	1	4	Positive	PCR & smMIP
BRAF	chr7	140481402	C	G	c.1406G>C (p.G469A)	nonsynonymous SNV	Lib_16_133_4D4R	4D4R	Yes	398	3221	0.031046	No	399	18578	0.19916	Yes	No	Yes	1	4	Positive	PCR & smMIP
BRAF	chr7	140482928	G	C	c.1207C>G (p.P403A)	nonsynonymous SNV	Lib_16_134_4D10R	4D10R	Yes	400	14163	0.134152	No	401	21485	0.107051	Yes	No	Yes	1	3	Positive	Replicate
BRAF	chr7	140482928	G	C	c.1207C>G (p.P403A)	nonsynonymous SNV	Lib_2_174_4D10	4D10	Yes	400	6096	0.049213	No	401	8868	0.135318	Yes	No	Yes	1	3	Positive	Replicate
FGFR2	chr10	123274803	G	C	c.1115C>G (p.S372C)	nonsynonymous SNV	Lib_2_177_4D13	4D13	No	44	33864	0.41	Yes	-	-	-	-	-	Yes	1	13	Positive	Replicate
FGFR2	chr10	123274803	G	C	c.1115C>G (p.S372C)	nonsynonymous SNV	Lib_16_135_4D13R	4D13R	No	44	28557	0.25	Yes	-	-	-	-	-	Yes	1	13	Positive	Replicate
PTPN11	chr12	112888197	T	G	c.213T>G (p.F71L)	nonsynonymous SNV	Lib_3_188_4D28	4D28	Yes	148	19464	0.313399	Yes	149	21543	0.241378	No	No	Yes	1	24	Positive	Replicate
PTPN11	chr12	112888197	T	G	c.213T>G (p.F71L)	nonsynonymous SNV	Lib_16_136_4D28R	4D28R	Yes	148	26058	0.652391	Yes	149	26931	0.315621	No	No	Yes	1	24	Positive	Replicate
MAP2K2	chr19	4117383	C	G	-	intronic	Lib_13_85_5J27	5J27	No	241	18488	0.059	Yes	-	-	-	-	-	Yes	1	NA	Negative	PCR
MAP2K2	chr19	4117383	C	G	-	intronic	Lib_16_144_5J27R	5J27R	No	241	12456	0.128	Yes	-	-	-	-	-	Yes	1	NA	Negative	PCR
Non-replicated calls
SOS1	chr2	39262566	G	T	c.940C>A (p.Q314K)	nonsynonymous SNV	Lib_16_134_4D10R	4D10R	No	272	13880	0.1	Yes	-	-	-	-	-	No	3	NA	NA	not resequenced
SOS1	chr2	39285879	T	G	c.280A>C (p.I94L)	nonsynonymous SNV	Lib_16_144_5J27R	5J27R	No	275	12746	0.13	Yes	-	-	-	-	-	No	3	NA	Negative	PCR
PIK3CA	chr3	178941885	T	G	c.2204T>G (p.L735X)	stopgain	Lib_16_144_5J27R	5J27R	No	314	12994	0.09	Yes	-	-	-	-	-	No	4	NA	NA	not resequenced
BRAF	chr7	140476802	G	C	c.1604C>G (p.S535C)	nonsynonymous SNV	Lib_16_133_4D4R	4D4R	No	395	12935	0.09	Yes	-	-	-	-	-	No	3	NA	NA	not resequenced
FGFR2	chr10	123279677	G	C	c.755C>G (p.S252W)	nonsynonymous SNV	Lib_2_169_4D4	4D4	Yes	50	17355	0.097954	No		12002	0.191635	Yes	No	No	1^	7	Positive	Inferred-same event
ZBTB16	chr11	113934757	G	C	c.735G>C (p.M245I)	nonsynonymous SNV	Lib_13_83_5J25	5J25	No	102	17148	0.1	Yes	-	-	-	-	-	No	3	NA	Negative	Inferred-same mutation
CBL	chr11	119148991	G	A	c.1211G>A (p.C404Y)	nonsynonymous SNV	Lib_16_141_5J17R	5J17R	Yes	122	5186	0.520632	Yes		59	low cvge	No	No	No	2	42	Positive	smMIP
TP53	chr17	7577144	A	C	c.794T>G (p.L265R)	nonsynonymous SNV	Lib_16_138_3D13R	3D13R	No	220	19024	0.12	Yes	-	-	-	-	-	No	3	NA	NA	not resequenced
