# Supplementary material for: Selfish mutations dysregulating RAS-MAPK signaling are pervasive in aged human testes
Source: Genome Res. 2018 Dec;28(12):1779–90. doi: 10.1101/gr.239186.118 (PMC6280762; doi:10.1101/gr.239186.118)
Supplement: Supplemental Material [file supp_gr.239186.118_Supplemental_Table_S5.xlsx]

## Sheet: Legend
Supplemental Table S5 – Sample information
(I) Details of testes collected for this study, dissected slices and number of biopsies.
(II) Details of biopsy and sequencing IDs (including reference to FastQ files)

## Sheet: (I) Testis information
Individual	Age (yrs)	Previously reported?	Source	Number of slices dissected	Number of slices used in this study	Number of biopsies per slice (individual slides A-J)	Individual biopsies further dissected (biopsy ID)	Number of biopsies that passed QC following DNA extraction	Adjacent FFPE slices
1	71	Sample 1 (Lim et al., 2012); Testis 1 (Maher et al., 2016)	Donated by anonymized patient; obtained from tissue bank of the Department of Cellular Pathology, John Radcliffe Hospital, Oxford, UK.	8	1	30(D)	4 (10a,b; 12a,b; 15a,b; 17a,b)	34	Yes (Block C)
2	83	-	Donated by anonymized patient; obtained from tissue bank of the Department of Cellular Pathology, John Radcliffe Hospital, Oxford, UK.	8	1	30(F)	1 (30a,b)	30	Yes (Block E)
3	87	-	Medical Solutions (Peterborough, UK)	9	1	32(D)	0	32	no - only frozen
4	90	-	Medical Solutions (Peterborough, UK)	7	6	21(B); 28(C); 36(D); 25(E); 28(F); 20(G)	0	153	no - only frozen
5	34	-	Medical Solutions (Peterborough, UK)	12	1	28(J)	0	27	no - only frozen

## Sheet: (II) Sequenced biopsies
Individual	Slice ID	Biopsy number	Biopsy ID	Flow cell (FC) number	Illumina lane #	Library # (Lib)	Barcode (BC) #	Sample number	Lib_Sample number_Biopsy ID	FASTQ read 1 file name	FASTQ read 2 file name	Comment
1	D	1	1D1	FC1	98550	7	BC6	258	Lib7_258_1D1	WTCHG_98550_06_1.fastq.gz	WTCHG_98550_06_2.fastq.gz
1	D	2	1D2	FC1	98550	7	BC7	259	Lib7_259_1D2	WTCHG_98550_07_1.fastq.gz	WTCHG_98550_07_2.fastq.gz
1	D	3	1D3	FC1	98550	7	BC8	260	Lib7_260_1D3	WTCHG_98550_08_1.fastq.gz	WTCHG_98550_08_2.fastq.gz
1	D	4	1D4	FC1	98550	7	BC9	261	Lib7_261_1D4	WTCHG_98550_09_1.fastq.gz	WTCHG_98550_09_2.fastq.gz
1	D	5	1D5	FC1	98550	7	BC10	262	Lib7_262_1D5	WTCHG_98550_10_1.fastq.gz	WTCHG_98550_10_2.fastq.gz
1	D	6	1D6	FC1	98550	7	BC11	263	Lib7_263_1D6	WTCHG_98550_11_1.fastq.gz	WTCHG_98550_11_2.fastq.gz
1	D	7	1D7	FC1	98550	7	BC12	264	Lib7_264_1D7	WTCHG_98550_12_1.fastq.gz	WTCHG_98550_12_2.fastq.gz
1	D	8	1D8	FC1	98550	7	BC13	265	Lib7_265_1D8	WTCHG_98550_13_1.fastq.gz	WTCHG_98550_13_2.fastq.gz
1	D	9	1D9	FC1	98550	7	BC14	266	Lib7_266_1D9	WTCHG_98550_14_1.fastq.gz	WTCHG_98550_14_2.fastq.gz
1	D	10a	1D10a	FC1	98550	7	BC15	267	Lib7_267_1D10a	WTCHG_98550_15_1.fastq.gz	WTCHG_98550_15_2.fastq.gz
1	D	10b	1D10b	FC2	107224	15	BC7	115	Lib15_115_1D10b	WTCHG_107224_07_1.fastq.gz	WTCHG_107224_07_2.fastq.gz
1	D	11	1D11	FC1	98550	7	BC16	268	Lib7_268_1D11	WTCHG_98550_16_1.fastq.gz	WTCHG_98550_16_2.fastq.gz
1	D	12a	1D12a	FC1	98550	7	BC17	269	Lib7_269_1D12a	WTCHG_98550_17_1.fastq.gz	WTCHG_98550_17_2.fastq.gz
1	D	12b	1D12b	FC1	98550	7	BC18	270	Lib7_270_1D12b	WTCHG_98550_18_1.fastq.gz	WTCHG_98550_18_2.fastq.gz
1	D	13	1D13	FC2	107218	9	BC1	1	Lib9_1_1D13	WTCHG_107218_01_1.fastq.gz	WTCHG_107218_01_2.fastq.gz
1	D	14	1D14	FC2	107218	9	BC2	2	Lib9_2_1D14	WTCHG_107218_02_1.fastq.gz	WTCHG_107218_02_2.fastq.gz
1	D	15a	1D15a	FC2	107218	9	BC3	3	Lib9_3_1D15a	WTCHG_107218_03_1.fastq.gz	WTCHG_107218_03_2.fastq.gz
1	D	15b	1D15b	FC2	107218	9	BC4	4	Lib9_4_1D15b	WTCHG_107218_04_1.fastq.gz	WTCHG_107218_04_2.fastq.gz
1	D	16	1D16	FC2	107218	9	BC5	5	Lib9_5_1D16	WTCHG_107218_05_1.fastq.gz	WTCHG_107218_05_2.fastq.gz
1	D	17a	1D17a	FC2	107218	9	BC6	6	Lib9_6_1D17a	WTCHG_107218_06_1.fastq.gz	WTCHG_107218_06_2.fastq.gz
1	D	17b	1D17b	FC2	107218	9	BC7	7	Lib9_7_1D17b	WTCHG_107218_07_1.fastq.gz	WTCHG_107218_07_2.fastq.gz
1	D	18	1D18	FC2	107218	9	BC8	8	Lib9_8_1D18	WTCHG_107218_08_1.fastq.gz	WTCHG_107218_08_2.fastq.gz
1	D	19	1D19	FC2	107218	9	BC9	9	Lib9_9_1D19	WTCHG_107218_09_1.fastq.gz	WTCHG_107218_09_2.fastq.gz
1	D	20	1D20	FC2	107218	9	BC10	10	Lib9_10_1D20	WTCHG_107218_10_1.fastq.gz	WTCHG_107218_10_2.fastq.gz
1	D	21	1D21	FC2	107218	9	BC11	11	Lib9_11_1D21	WTCHG_107218_11_1.fastq.gz	WTCHG_107218_11_2.fastq.gz
1	D	22	1D22	FC2	107218	9	BC12	12	Lib9_12_1D22	WTCHG_107218_12_1.fastq.gz	WTCHG_107218_12_2.fastq.gz
1	D	23	1D23	FC2	107218	9	BC13	13	Lib9_13_1D23	WTCHG_107218_13_1.fastq.gz	WTCHG_107218_13_2.fastq.gz
1	D	24	1D24	FC2	107218	9	BC14	14	Lib9_14_1D24	WTCHG_107218_14_1.fastq.gz	WTCHG_107218_14_2.fastq.gz
1	D	25	1D25	FC2	107218	9	BC15	15	Lib9_15_1D25	WTCHG_107218_15_1.fastq.gz	WTCHG_107218_15_2.fastq.gz
1	D	26	1D26	FC2	107218	9	BC16	16	Lib9_16_1D26	WTCHG_107218_16_1.fastq.gz	WTCHG_107218_16_2.fastq.gz
1	D	27	1D27	FC2	107218	9	BC17	17	Lib9_17_1D27	WTCHG_107218_17_1.fastq.gz	WTCHG_107218_17_2.fastq.gz
1	D	28	1D28	FC2	107218	9	BC18	18	Lib9_18_1D28	WTCHG_107218_18_1.fastq.gz	WTCHG_107218_18_2.fastq.gz
1	D	29	1D29	FC2	107219	10	BC1	19	Lib10_19_1D29	WTCHG_107219_01_1.fastq.gz	WTCHG_107219_01_2.fastq.gz
1	D	30	1D30	FC2	107219	10	BC2	20	Lib10_20_1D30	WTCHG_107219_02_1.fastq.gz	WTCHG_107219_02_2.fastq.gz
2	F	1	2F1	FC2	107219	10	BC3	21	Lib10_21_2F1	WTCHG_107219_03_1.fastq.gz	WTCHG_107219_03_2.fastq.gz
2	F	2	2F2	FC2	107219	10	BC4	22	Lib10_22_2F2	WTCHG_107219_04_1.fastq.gz	WTCHG_107219_04_2.fastq.gz
2	F	3	2F3	FC2	107219	10	BC5	23	Lib10_23_2F3	WTCHG_107219_05_1.fastq.gz	WTCHG_107219_05_2.fastq.gz
2	F	4	2F4	FC2	107219	10	BC6	24	Lib10_24_2F4	WTCHG_107219_06_1.fastq.gz	WTCHG_107219_06_2.fastq.gz
2	F	5	2F5	FC1	98551	8	BC7	277	Lib8_277_2F5	WTCHG_98551_07_1.fastq.gz	WTCHG_98551_07_2.fastq.gz
2	F	6	2F6	FC1	98551	8	BC8	278	Lib8_278_2F6	WTCHG_98551_08_1.fastq.gz	WTCHG_98551_08_2.fastq.gz
2	F	7	2F7	FC1	98551	8	BC9	279	Lib8_279_2F7	WTCHG_98551_09_1.fastq.gz	WTCHG_98551_09_2.fastq.gz
2	F	8	2F8	FC1	98551	8	BC10	280	Lib8_280_2F8	WTCHG_98551_10_1.fastq.gz	WTCHG_98551_10_2.fastq.gz
2	F	9	2F9	FC1	98551	8	BC11	281	Lib8_281_2F9	WTCHG_98551_11_1.fastq.gz	WTCHG_98551_11_2.fastq.gz
2	F	10	2F10	FC1	98551	8	BC12	282	Lib8_282_2F10	WTCHG_98551_12_1.fastq.gz	WTCHG_98551_12_2.fastq.gz
2	F	11	2F11	FC1	98551	8	BC13	283	Lib8_283_2F11	WTCHG_98551_13_1.fastq.gz	WTCHG_98551_13_2.fastq.gz
2	F	12	2F12	FC1	98551	8	BC14	284	Lib8_284_2F12	WTCHG_98551_14_1.fastq.gz	WTCHG_98551_14_2.fastq.gz
2	F	13	2F13	FC1	98551	8	BC16	286	Lib8_286_2F13	WTCHG_98551_16_1.fastq.gz	WTCHG_98551_16_2.fastq.gz
2	F	14	2F14	FC1	98551	8	BC15	285	Lib8_285_2F14	WTCHG_98551_15_1.fastq.gz	WTCHG_98551_15_2.fastq.gz
2	F	15	2F15	FC1	98551	8	BC17	287	Lib8_287_2F15	WTCHG_98551_17_1.fastq.gz	WTCHG_98551_17_2.fastq.gz
2	F	16	2F16	FC1	98551	8	BC18	288	Lib8_288_2F16	WTCHG_98551_18_1.fastq.gz	WTCHG_98551_18_2.fastq.gz
2	F	17	2F17	FC1	98551	8	BC1	271	Lib8_271_2F17	WTCHG_98551_01_1.fastq.gz	WTCHG_98551_01_2.fastq.gz
2	F	18	2F18	FC1	98551	8	BC2	272	Lib8_272_2F18	WTCHG_98551_02_1.fastq.gz	WTCHG_98551_02_2.fastq.gz
2	F	20	2F20	FC1	98551	8	BC3	273	Lib8_273_2F20	WTCHG_98551_03_1.fastq.gz	WTCHG_98551_03_2.fastq.gz
2	F	21	2F21	FC1	98551	8	BC4	274	Lib8_274_2F21	WTCHG_98551_04_1.fastq.gz	WTCHG_98551_04_2.fastq.gz
2	F	22	2F22	FC1	98551	8	BC5	275	Lib8_275_2F22	WTCHG_98551_05_1.fastq.gz	WTCHG_98551_05_2.fastq.gz
2	F	23	2F23	FC1	98551	8	BC6	276	Lib8_276_2F23	WTCHG_98551_06_1.fastq.gz	WTCHG_98551_06_2.fastq.gz
2	F	24	2F24	FC2	107219	10	BC7	25	Lib10_25_2F24	WTCHG_107219_07_1.fastq.gz	WTCHG_107219_07_2.fastq.gz
2	F	25	2F25	FC2	107219	10	BC8	26	Lib10_26_2F25	WTCHG_107219_08_1.fastq.gz	WTCHG_107219_08_2.fastq.gz
2	F	26	2F26	FC2	107219	10	BC9	27	Lib10_27_2F26	WTCHG_107219_09_1.fastq.gz	WTCHG_107219_09_2.fastq.gz
2	F	27	2F27	FC2	107219	10	BC10	28	Lib10_28_2F27	WTCHG_107219_10_1.fastq.gz	WTCHG_107219_10_2.fastq.gz
2	F	28	2F28	FC2	107219	10	BC11	29	Lib10_29_2F28	WTCHG_107219_11_1.fastq.gz	WTCHG_107219_11_2.fastq.gz
2	F	29	2F29	FC2	107219	10	BC12	30	Lib10_30_2F29	WTCHG_107219_12_1.fastq.gz	WTCHG_107219_12_2.fastq.gz
2	F	30a	2F30a	FC2	107219	10	BC13	31	Lib10_31_2F30a	WTCHG_107219_13_1.fastq.gz	WTCHG_107219_13_2.fastq.gz
2	F	30b	2F30b	FC2	107219	10	BC14	32	Lib10_32_2F30b	WTCHG_107219_14_1.fastq.gz	WTCHG_107219_14_2.fastq.gz
3	D	1	3D1	FC2	107219	10	BC15	33	Lib10_33_3D1	WTCHG_107219_15_1.fastq.gz	WTCHG_107219_15_2.fastq.gz
3	D	2	3D2	FC2	107219	10	BC16	34	Lib10_34_3D2	WTCHG_107219_16_1.fastq.gz	WTCHG_107219_16_2.fastq.gz
3	D	3	3D3	FC2	107219	10	BC17	35	Lib10_35_3D3	WTCHG_107219_17_1.fastq.gz	WTCHG_107219_17_2.fastq.gz
3	D	4	3D4	FC2	107219	10	BC18	36	Lib10_36_3D4	WTCHG_107219_18_1.fastq.gz	WTCHG_107219_18_2.fastq.gz
3	D	5	3D5	FC2	107220	11	BC1	37	Lib11_37_3D5	WTCHG_107220_01_1.fastq.gz	WTCHG_107220_01_2.fastq.gz
3	D	5	3D5R	FC2	107225	16	BC11	137	Lib16_137_3D5R	WTCHG_107225_11_1.fastq.gz	WTCHG_107225_11_2.fastq.gz	Replicated sample
3	D	6	3D6	FC2	107220	11	BC2	38	Lib11_38_3D6	WTCHG_107220_02_1.fastq.gz	WTCHG_107220_02_2.fastq.gz
3	D	7	3D7	FC2	107220	11	BC3	39	Lib11_39_3D7	WTCHG_107220_03_1.fastq.gz	WTCHG_107220_03_2.fastq.gz
3	D	8	3D8	FC2	107220	11	BC4	40	Lib11_40_3D8	WTCHG_107220_04_1.fastq.gz	WTCHG_107220_04_2.fastq.gz
3	D	9	3D9	FC2	107220	11	BC5	41	Lib11_41_3D9	WTCHG_107220_05_1.fastq.gz	WTCHG_107220_05_2.fastq.gz
3	D	10	3D10	FC2	107220	11	BC6	42	Lib11_42_3D10	WTCHG_107220_06_1.fastq.gz	WTCHG_107220_06_2.fastq.gz
3	D	11	3D11	FC2	107220	11	BC7	43	Lib11_43_3D11	WTCHG_107220_07_1.fastq.gz	WTCHG_107220_07_2.fastq.gz
3	D	12	3D12	FC2	107220	11	BC8	44	Lib11_44_3D12	WTCHG_107220_08_1.fastq.gz	WTCHG_107220_08_2.fastq.gz
3	D	13	3D13	FC2	107220	11	BC9	45	Lib11_45_3D13	WTCHG_107220_09_1.fastq.gz	WTCHG_107220_09_2.fastq.gz
3	D	13	3D13R	FC2	107225	16	BC12	138	Lib16_138_3D13R	WTCHG_107225_12_1.fastq.gz	WTCHG_107225_12_2.fastq.gz	Replicated sample
3	D	14	3D14	FC2	107220	11	BC10	46	Lib11_46_3D14	WTCHG_107220_10_1.fastq.gz	WTCHG_107220_10_2.fastq.gz
3	D	15	3D15	FC2	107220	11	BC11	47	Lib11_47_3D15	WTCHG_107220_11_1.fastq.gz	WTCHG_107220_11_2.fastq.gz
3	D	16	3D16	FC2	107220	11	BC12	48	Lib11_48_3D16	WTCHG_107220_12_1.fastq.gz	WTCHG_107220_12_2.fastq.gz
3	D	16	3D16R	FC2	107225	16	BC13	139	Lib16_139_3D16R	WTCHG_107225_13_1.fastq.gz	WTCHG_107225_13_2.fastq.gz	Replicated sample
3	D	17	3D17	FC2	107220	11	BC13	49	Lib11_49_3D17	WTCHG_107220_13_1.fastq.gz	WTCHG_107220_13_2.fastq.gz
3	D	18	3D18	FC2	107220	11	BC14	50	Lib11_50_3D18	WTCHG_107220_14_1.fastq.gz	WTCHG_107220_14_2.fastq.gz
3	D	19	3D19	FC2	107220	11	BC15	51	Lib11_51_3D19	WTCHG_107220_15_1.fastq.gz	WTCHG_107220_15_2.fastq.gz
3	D	20	3D20	FC2	107220	11	BC16	52	Lib11_52_3D20	WTCHG_107220_16_1.fastq.gz	WTCHG_107220_16_2.fastq.gz
3	D	21	3D21	FC2	107220	11	BC17	53	Lib11_53_3D21	WTCHG_107220_17_1.fastq.gz	WTCHG_107220_17_2.fastq.gz
3	D	22	3D22	FC2	107220	11	BC18	54	Lib11_54_3D22	WTCHG_107220_18_1.fastq.gz	WTCHG_107220_18_2.fastq.gz
3	D	23A	3D23A	FC2	107221	12	BC1	55	Lib12_55_3D23A	WTCHG_107221_01_1.fastq.gz	WTCHG_107221_01_2.fastq.gz
3	D	24A	3D24A	FC2	107221	12	BC2	56	Lib12_56_3D24A	WTCHG_107221_02_1.fastq.gz	WTCHG_107221_02_2.fastq.gz
3	D	25	3D25	FC2	107221	12	BC3	57	Lib12_57_3D25	WTCHG_107221_03_1.fastq.gz	WTCHG_107221_03_2.fastq.gz
3	D	26	3D26	FC2	107221	12	BC4	58	Lib12_58_3D26	WTCHG_107221_04_1.fastq.gz	WTCHG_107221_04_2.fastq.gz
3	D	27	3D27	FC2	107221	12	BC5	59	Lib12_59_3D27	WTCHG_107221_05_1.fastq.gz	WTCHG_107221_05_2.fastq.gz
3	D	28	3D28	FC2	107221	12	BC6	60	Lib12_60_3D28	WTCHG_107221_06_1.fastq.gz	WTCHG_107221_06_2.fastq.gz
3	D	29	3D29	FC2	107221	12	BC7	61	Lib12_61_3D29	WTCHG_107221_07_1.fastq.gz	WTCHG_107221_07_2.fastq.gz
3	D	30	3D30	FC2	107221	12	BC8	62	Lib12_62_3D30	WTCHG_107221_08_1.fastq.gz	WTCHG_107221_08_2.fastq.gz
3	D	31	3D31	FC2	107221	12	BC9	63	Lib12_63_3D31	WTCHG_107221_09_1.fastq.gz	WTCHG_107221_09_2.fastq.gz
3	D	32	3D32	FC2	107221	12	BC10	64	Lib12_64_3D32	WTCHG_107221_10_1.fastq.gz	WTCHG_107221_10_2.fastq.gz
3	D	32	3D32R	FC2	107225	16	BC14	140	Lib16_140_3D32R	WTCHG_107225_14_1.fastq.gz	WTCHG_107225_14_2.fastq.gz	Replicated sample
4	B	1	4B1	FC2	107223	14	BC7	97	Lib14_97_4B1	WTCHG_107223_07_1.fastq.gz	WTCHG_107223_07_2.fastq.gz
4	B	3	4B3	FC2	107223	14	BC8	98	Lib14_98_4B3	WTCHG_107223_08_1.fastq.gz	WTCHG_107223_08_2.fastq.gz
4	B	4	4B4	FC2	107223	14	BC9	99	Lib14_99_4B4	WTCHG_107223_09_1.fastq.gz	WTCHG_107223_09_2.fastq.gz
4	B	6	4B6	FC2	107222	13	BC14	86	Lib13_86_4B6	WTCHG_107222_14_1.fastq.gz	WTCHG_107222_14_2.fastq.gz
4	B	7	4B7	FC2	107222	13	BC15	87	Lib13_87_4B7	WTCHG_107222_15_1.fastq.gz	WTCHG_107222_15_2.fastq.gz
4	B	9	4B9	FC2	107222	13	BC16	88	Lib13_88_4B9	WTCHG_107222_16_1.fastq.gz	WTCHG_107222_16_2.fastq.gz
4	B	10	4B10	FC2	107223	14	BC10	100	Lib14_100_4B10	WTCHG_107223_10_1.fastq.gz	WTCHG_107223_10_2.fastq.gz
4	B	12	4B12	FC2	107223	14	BC11	101	Lib14_101_4B12	WTCHG_107223_11_1.fastq.gz	WTCHG_107223_11_2.fastq.gz
4	B	13	4B13	FC2	107222	13	BC17	89	Lib13_89_4B13	WTCHG_107222_17_1.fastq.gz	WTCHG_107222_17_2.fastq.gz
4	B	14	4B14	FC2	107222	13	BC18	90	Lib13_90_4B14	WTCHG_107222_18_1.fastq.gz	WTCHG_107222_18_2.fastq.gz
4	B	15	4B15	FC2	107223	14	BC1	91	Lib14_91_4B15	WTCHG_107223_01_1.fastq.gz	WTCHG_107223_01_2.fastq.gz
4	B	16	4B16	FC2	107223	14	BC2	92	Lib14_92_4B16	WTCHG_107223_02_1.fastq.gz	WTCHG_107223_02_2.fastq.gz
4	B	17	4B17	FC2	107223	14	BC3	93	Lib14_93_4B17	WTCHG_107223_03_1.fastq.gz	WTCHG_107223_03_2.fastq.gz
4	B	18	4B18	FC2	107223	14	BC4	94	Lib14_94_4B18	WTCHG_107223_04_1.fastq.gz	WTCHG_107223_04_2.fastq.gz
4	B	20	4B20	FC2	107223	14	BC5	95	Lib14_95_4B20	WTCHG_107223_05_1.fastq.gz	WTCHG_107223_05_2.fastq.gz
4	B	21	4B21	FC2	107223	14	BC6	96	Lib14_96_4B21	WTCHG_107223_06_1.fastq.gz	WTCHG_107223_06_2.fastq.gz
4	C	1	4C1	FC2	107223	14	BC13	103	Lib14_103_4C1	WTCHG_107223_13_1.fastq.gz	WTCHG_107223_13_2.fastq.gz
4	C	2	4C2	FC2	107223	14	BC17	107	Lib14_107_4C2	WTCHG_107223_17_1.fastq.gz	WTCHG_107223_17_2.fastq.gz
4	C	3	4C3	FC2	107223	14	BC18	108	Lib14_108_4C3	WTCHG_107223_18_1.fastq.gz	WTCHG_107223_18_2.fastq.gz
4	C	4	4C4	FC1	98544	1	BC1	145	Lib1_145_4C4	WTCHG_98544_01_1.fastq.gz	WTCHG_98544_01_2.fastq.gz
4	C	5	4C5	FC1	98544	1	BC2	146	Lib1_146_4C5	WTCHG_98544_02_1.fastq.gz	WTCHG_98544_02_2.fastq.gz
4	C	6	4C6	FC2	107223	14	BC14	104	Lib14_104_4C6	WTCHG_107223_14_1.fastq.gz	WTCHG_107223_14_2.fastq.gz
4	C	7	4C7	FC1	98544	1	BC3	147	Lib1_147_4C7	WTCHG_98544_03_1.fastq.gz	WTCHG_98544_03_2.fastq.gz
4	C	8	4C8	FC2	107223	14	BC15	105	Lib14_105_4C8	WTCHG_107223_15_1.fastq.gz	WTCHG_107223_15_2.fastq.gz
4	C	9	4C9	FC1	98544	1	BC4	148	Lib1_148_4C9	WTCHG_98544_04_1.fastq.gz	WTCHG_98544_04_2.fastq.gz
4	C	10	4C10	FC1	98544	1	BC5	149	Lib1_149_4C10	WTCHG_98544_05_1.fastq.gz	WTCHG_98544_05_2.fastq.gz
4	C	11	4C11	FC2	107223	14	BC16	106	Lib14_106_4C11	WTCHG_107223_16_1.fastq.gz	WTCHG_107223_16_2.fastq.gz
4	C	12	4C12	FC1	98544	1	BC6	150	Lib1_150_4C12	WTCHG_98544_06_1.fastq.gz	WTCHG_98544_06_2.fastq.gz
4	C	13	4C13	FC1	98544	1	BC7	151	Lib1_151_4C13	WTCHG_98544_07_1.fastq.gz	WTCHG_98544_07_2.fastq.gz
4	C	14	4C14	FC1	98544	1	BC8	152	Lib1_152_4C14	WTCHG_98544_08_1.fastq.gz	WTCHG_98544_08_2.fastq.gz
4	C	15	4C15	FC1	98544	1	BC9	153	Lib1_153_4C15	WTCHG_98544_09_1.fastq.gz	WTCHG_98544_09_2.fastq.gz
4	C	16	4C16	FC1	98544	1	BC10	154	Lib1_154_4C16	WTCHG_98544_10_1.fastq.gz	WTCHG_98544_10_2.fastq.gz
4	C	17	4C17	FC1	98544	1	BC11	155	Lib1_155_4C17	WTCHG_98544_11_1.fastq.gz	WTCHG_98544_11_2.fastq.gz
4	C	18	4C18	FC1	98544	1	BC12	156	Lib1_156_4C18	WTCHG_98544_12_1.fastq.gz	WTCHG_98544_12_2.fastq.gz
4	C	19	4C19	FC1	98544	1	BC13	157	Lib1_157_4C19	WTCHG_98544_13_1.fastq.gz	WTCHG_98544_13_2.fastq.gz
4	C	20	4C20	FC1	98544	1	BC14	158	Lib1_158_4C20	WTCHG_98544_14_1.fastq.gz	WTCHG_98544_14_2.fastq.gz
4	C	21	4C21	FC1	98544	1	BC15	159	Lib1_159_4C21	WTCHG_98544_15_1.fastq.gz	WTCHG_98544_15_2.fastq.gz
4	C	22	4C22	FC1	98544	1	BC16	160	Lib1_160_4C22	WTCHG_98544_16_1.fastq.gz	WTCHG_98544_16_2.fastq.gz
4	C	23	4C23	FC1	98544	1	BC17	161	Lib1_161_4C23	WTCHG_98544_17_1.fastq.gz	WTCHG_98544_17_2.fastq.gz
4	C	24	4C24	FC1	98544	1	BC18	162	Lib1_162_4C24	WTCHG_98544_18_1.fastq.gz	WTCHG_98544_18_2.fastq.gz
4	C	25	4C25	FC1	98545	2	BC1	163	Lib2_163_4C25	WTCHG_98545_01_1.fastq.gz	WTCHG_98545_01_2.fastq.gz
4	C	26	4C26	FC1	98545	2	BC2	164	Lib2_164_4C26	WTCHG_98545_02_1.fastq.gz	WTCHG_98545_02_2.fastq.gz
4	C	27	4C27	FC1	98545	2	BC3	165	Lib2_165_4C27	WTCHG_98545_03_1.fastq.gz	WTCHG_98545_03_2.fastq.gz
4	C	28	4C28	FC1	98545	2	BC4	166	Lib2_166_4C28	WTCHG_98545_04_1.fastq.gz	WTCHG_98545_04_2.fastq.gz
4	D	1	4D1	FC1	98545	2	BC5	167	Lib2_167_4D1	WTCHG_98545_05_1.fastq.gz	WTCHG_98545_05_2.fastq.gz
4	D	2	4D2	FC1	98545	2	BC6	168	Lib2_168_4D2	WTCHG_98545_06_1.fastq.gz	WTCHG_98545_06_2.fastq.gz
4	D	3	4D3	FC2	107224	15	BC14	122	Lib15_122_4D3	WTCHG_107224_14_1.fastq.gz	WTCHG_107224_14_2.fastq.gz
4	D	4	4D4	FC1	98545	2	BC7	169	Lib2_169_4D4	WTCHG_98545_07_1.fastq.gz	WTCHG_98545_07_2.fastq.gz
4	D	4	4D4R	FC2	107225	16	BC7	133	Lib16_133_4D4R	WTCHG_107225_07_1.fastq.gz	WTCHG_107225_07_2.fastq.gz	Replicated sample
4	D	5	4D5	FC1	98545	2	BC8	170	Lib2_170_4D5	WTCHG_98545_08_1.fastq.gz	WTCHG_98545_08_2.fastq.gz
4	D	6	4D6	FC2	107224	15	BC15	123	Lib15_123_4D6	WTCHG_107224_15_1.fastq.gz	WTCHG_107224_15_2.fastq.gz
4	D	7	4D7	FC1	98545	2	BC9	171	Lib2_171_4D7	WTCHG_98545_09_1.fastq.gz	WTCHG_98545_09_2.fastq.gz
4	D	8	4D8	FC1	98545	2	BC10	172	Lib2_172_4D8	WTCHG_98545_10_1.fastq.gz	WTCHG_98545_10_2.fastq.gz
4	D	9	4D9	FC1	98545	2	BC11	173	Lib2_173_4D9	WTCHG_98545_11_1.fastq.gz	WTCHG_98545_11_2.fastq.gz
4	D	10	4D10	FC1	98545	2	BC12	174	Lib2_174_4D10	WTCHG_98545_12_1.fastq.gz	WTCHG_98545_12_2.fastq.gz
4	D	10	4D10R	FC2	107225	16	BC8	134	Lib16_134_4D10R	WTCHG_107225_08_1.fastq.gz	WTCHG_107225_08_2.fastq.gz	Replicated sample
4	D	11	4D11	FC1	98545	2	BC13	175	Lib2_175_4D11	WTCHG_98545_13_1.fastq.gz	WTCHG_98545_13_2.fastq.gz
4	D	12	4D12	FC1	98545	2	BC14	176	Lib2_176_4D12	WTCHG_98545_14_1.fastq.gz	WTCHG_98545_14_2.fastq.gz
4	D	13	4D13	FC1	98545	2	BC15	177	Lib2_177_4D13	WTCHG_98545_15_1.fastq.gz	WTCHG_98545_15_2.fastq.gz
4	D	13	4D13R	FC2	107225	16	BC9	135	Lib16_135_4D13R	WTCHG_107225_09_1.fastq.gz	WTCHG_107225_09_2.fastq.gz	Replicated sample
4	D	14	4D14	FC2	107224	15	BC16	124	Lib15_124_4D14	WTCHG_107224_16_1.fastq.gz	WTCHG_107224_16_2.fastq.gz
4	D	15	4D15	FC1	98545	2	BC16	178	Lib2_178_4D15	WTCHG_98545_16_1.fastq.gz	WTCHG_98545_16_2.fastq.gz
4	D	16	4D16	FC1	98545	2	BC17	179	Lib2_179_4D16	WTCHG_98545_17_1.fastq.gz	WTCHG_98545_17_2.fastq.gz
4	D	17	4D17	FC1	98545	2	BC18	180	Lib2_180_4D17	WTCHG_98545_18_1.fastq.gz	WTCHG_98545_18_2.fastq.gz
4	D	18	4D18	FC1	98546	3	BC1	181	Lib3_181_4D18	WTCHG_98546_01_1.fastq.gz	WTCHG_98546_01_2.fastq.gz
4	D	19	4D19	FC1	98546	3	BC2	182	Lib3_182_4D19	WTCHG_98546_02_1.fastq.gz	WTCHG_98546_02_2.fastq.gz
4	D	20	4D20	FC1	98546	3	BC3	183	Lib3_183_4D20	WTCHG_98546_03_1.fastq.gz	WTCHG_98546_03_2.fastq.gz
4	D	21	4D21	FC1	98546	3	BC4	184	Lib3_184_4D21	WTCHG_98546_04_1.fastq.gz	WTCHG_98546_04_2.fastq.gz
4	D	22	4D22	FC1	98546	3	BC5	185	Lib3_185_4D22	WTCHG_98546_05_1.fastq.gz	WTCHG_98546_05_2.fastq.gz
4	D	23	4D23	FC2	107224	15	BC17	125	Lib15_125_4D23	WTCHG_107224_17_1.fastq.gz	WTCHG_107224_17_2.fastq.gz
4	D	24	4D24	FC1	98546	3	BC6	186	Lib3_186_4D24	WTCHG_98546_06_1.fastq.gz	WTCHG_98546_06_2.fastq.gz
4	D	25	4D25	FC2	107224	15	BC18	126	Lib15_126_4D25	WTCHG_107224_18_1.fastq.gz	WTCHG_107224_18_2.fastq.gz
4	D	26	4D26	FC1	98546	3	BC7	187	Lib3_187_4D26	WTCHG_98546_07_1.fastq.gz	WTCHG_98546_07_2.fastq.gz
4	D	27	4D27	FC2	107225	16	BC1	127	Lib16_127_4D27	WTCHG_107225_01_1.fastq.gz	WTCHG_107225_01_2.fastq.gz
4	D	28	4D28	FC1	98546	3	BC8	188	Lib3_188_4D28	WTCHG_98546_08_1.fastq.gz	WTCHG_98546_08_2.fastq.gz
4	D	28	4D28R	FC2	107225	16	BC10	136	Lib16_136_4D28R	WTCHG_107225_10_1.fastq.gz	WTCHG_107225_10_2.fastq.gz	Replicated sample
4	D	29	4D29	FC1	98546	3	BC9	189	Lib3_189_4D29	WTCHG_98546_09_1.fastq.gz	WTCHG_98546_09_2.fastq.gz
4	D	30	4D30	FC1	98546	3	BC10	190	Lib3_190_4D30	WTCHG_98546_10_1.fastq.gz	WTCHG_98546_10_2.fastq.gz
4	D	31	4D31	FC1	98546	3	BC11	191	Lib3_191_4D31	WTCHG_98546_11_1.fastq.gz	WTCHG_98546_11_2.fastq.gz
4	D	32	4D32	FC1	98546	3	BC12	192	Lib3_192_4D32	WTCHG_98546_12_1.fastq.gz	WTCHG_98546_12_2.fastq.gz
4	D	33	4D33	FC1	98546	3	BC13	193	Lib3_193_4D33	WTCHG_98546_13_1.fastq.gz	WTCHG_98546_13_2.fastq.gz
4	D	34	4D34	FC1	98546	3	BC14	194	Lib3_194_4D34	WTCHG_98546_14_1.fastq.gz	WTCHG_98546_14_2.fastq.gz
4	D	35	4D35	FC1	98546	3	BC15	195	Lib3_195_4D35	WTCHG_98546_15_1.fastq.gz	WTCHG_98546_15_2.fastq.gz
4	D	36	4D36	FC1	98546	3	BC16	196	Lib3_196_4D36	WTCHG_98546_16_1.fastq.gz	WTCHG_98546_16_2.fastq.gz
4	E	1	4E1	FC1	98546	3	BC17	197	Lib3_197_4E1	WTCHG_98546_17_1.fastq.gz	WTCHG_98546_17_2.fastq.gz
4	E	2	4E2	FC1	98546	3	BC18	198	Lib3_198_4E2	WTCHG_98546_18_1.fastq.gz	WTCHG_98546_18_2.fastq.gz
4	E	3	4E3	FC2	107225	16	BC2	128	Lib16_128_4E3	WTCHG_107225_02_1.fastq.gz	WTCHG_107225_02_2.fastq.gz
4	E	4	4E4	FC1	98547	4	BC1	199	Lib4_199_4E4	WTCHG_98547_01_1.fastq.gz	WTCHG_98547_01_2.fastq.gz
4	E	5	4E5	FC1	98547	4	BC2	200	Lib4_200_4E5	WTCHG_98547_02_1.fastq.gz	WTCHG_98547_02_2.fastq.gz
4	E	6	4E6	FC1	98547	4	BC3	201	Lib4_201_4E6	WTCHG_98547_03_1.fastq.gz	WTCHG_98547_03_2.fastq.gz
4	E	7	4E7	FC1	98547	4	BC4	202	Lib4_202_4E7	WTCHG_98547_04_1.fastq.gz	WTCHG_98547_04_2.fastq.gz
4	E	8	4E8	FC1	98547	4	BC5	203	Lib4_203_4E8	WTCHG_98547_05_1.fastq.gz	WTCHG_98547_05_2.fastq.gz
4	E	9	4E9	FC1	98547	4	BC6	204	Lib4_204_4E9	WTCHG_98547_06_1.fastq.gz	WTCHG_98547_06_2.fastq.gz
4	E	10	4E10	FC1	98547	4	BC7	205	Lib4_205_4E10	WTCHG_98547_07_1.fastq.gz	WTCHG_98547_07_2.fastq.gz
4	E	11	4E11	FC1	98547	4	BC8	206	Lib4_206_4E11	WTCHG_98547_08_1.fastq.gz	WTCHG_98547_08_2.fastq.gz
4	E	12	4E12	FC1	98547	4	BC9	207	Lib4_207_4E12	WTCHG_98547_09_1.fastq.gz	WTCHG_98547_09_2.fastq.gz
4	E	13	4E13	FC1	98547	4	BC10	208	Lib4_208_4E13	WTCHG_98547_10_1.fastq.gz	WTCHG_98547_10_2.fastq.gz
4	E	14	4E14	FC1	98547	4	BC11	209	Lib4_209_4E14	WTCHG_98547_11_1.fastq.gz	WTCHG_98547_11_2.fastq.gz
4	E	15	4E15	FC1	98547	4	BC12	210	Lib4_210_4E15	WTCHG_98547_12_1.fastq.gz	WTCHG_98547_12_2.fastq.gz
4	E	16	4E16	FC1	98547	4	BC13	211	Lib4_211_4E16	WTCHG_98547_13_1.fastq.gz	WTCHG_98547_13_2.fastq.gz
4	E	17	4E17	FC1	98547	4	BC14	212	Lib4_212_4E17	WTCHG_98547_14_1.fastq.gz	WTCHG_98547_14_2.fastq.gz
4	E	18	4E18	FC1	98547	4	BC15	213	Lib4_213_4E18	WTCHG_98547_15_1.fastq.gz	WTCHG_98547_15_2.fastq.gz
4	E	19	4E19	FC1	98547	4	BC16	214	Lib4_214_4E19	WTCHG_98547_16_1.fastq.gz	WTCHG_98547_16_2.fastq.gz
4	E	20	4E20	FC1	98547	4	BC17	215	Lib4_215_4E20	WTCHG_98547_17_1.fastq.gz	WTCHG_98547_17_2.fastq.gz
4	E	21	4E21	FC1	98547	4	BC18	216	Lib4_216_4E21	WTCHG_98547_18_1.fastq.gz	WTCHG_98547_18_2.fastq.gz
4	E	22	4E22	FC1	98548	5	BC1	217	Lib5_217_4E22	WTCHG_98548_01_1.fastq.gz	WTCHG_98548_01_2.fastq.gz
4	E	23	4E23	FC1	98548	5	BC2	218	Lib5_218_4E23	WTCHG_98548_02_1.fastq.gz	WTCHG_98548_02_2.fastq.gz
4	E	24	4E24	FC1	98548	5	BC3	219	Lib5_219_4E24	WTCHG_98548_03_1.fastq.gz	WTCHG_98548_03_2.fastq.gz
4	E	25	4E25	FC1	98548	5	BC4	220	Lib5_220_4E25	WTCHG_98548_04_1.fastq.gz	WTCHG_98548_04_2.fastq.gz
4	F	1	4F1	FC1	98548	5	BC5	221	Lib5_221_4F1	WTCHG_98548_05_1.fastq.gz	WTCHG_98548_05_2.fastq.gz
4	F	2	4F2	FC2	107225	16	BC3	129	Lib16_129_4F2	WTCHG_107225_03_1.fastq.gz	WTCHG_107225_03_2.fastq.gz
4	F	3	4F3	FC2	107225	16	BC4	130	Lib16_130_4F3	WTCHG_107225_04_1.fastq.gz	WTCHG_107225_04_2.fastq.gz
4	F	4	4F4	FC1	98548	5	BC6	222	Lib5_222_4F4	WTCHG_98548_06_1.fastq.gz	WTCHG_98548_06_2.fastq.gz
4	F	5	4F5	FC1	98548	5	BC7	223	Lib5_223_4F5	WTCHG_98548_07_1.fastq.gz	WTCHG_98548_07_2.fastq.gz
4	F	6	4F6	FC1	98548	5	BC8	224	Lib5_224_4F6	WTCHG_98548_08_1.fastq.gz	WTCHG_98548_08_2.fastq.gz
4	F	7	4F7	FC2	107223	14	BC12	102	Lib14_102_4F7	WTCHG_107223_12_1.fastq.gz	WTCHG_107223_12_2.fastq.gz
4	F	8	4F8	FC1	98548	5	BC10	226	Lib5_226_4F8	WTCHG_98548_10_1.fastq.gz	WTCHG_98548_10_2.fastq.gz
4	F	9	4F9	FC1	98548	5	BC11	227	Lib5_227_4F9	WTCHG_98548_11_1.fastq.gz	WTCHG_98548_11_2.fastq.gz
4	F	10	4F10	FC1	98548	5	BC12	228	Lib5_228_4F10	WTCHG_98548_12_1.fastq.gz	WTCHG_98548_12_2.fastq.gz
4	F	11	4F11	FC2	107225	16	BC5	131	Lib16_131_4F11	WTCHG_107225_05_1.fastq.gz	WTCHG_107225_05_2.fastq.gz
4	F	12	4F12	FC2	107225	16	BC6	132	Lib16_132_4F12	WTCHG_107225_06_1.fastq.gz	WTCHG_107225_06_2.fastq.gz
4	F	13	4F13	FC1	98548	5	BC13	229	Lib5_229_4F13	WTCHG_98548_13_1.fastq.gz	WTCHG_98548_13_2.fastq.gz
4	F	14	4F14	FC1	98548	5	BC9	225	Lib5_225_4F14	WTCHG_98548_09_1.fastq.gz	WTCHG_98548_09_2.fastq.gz
4	F	15	4F15	FC1	98548	5	BC14	230	Lib5_230_4F15	WTCHG_98548_14_1.fastq.gz	WTCHG_98548_14_2.fastq.gz
4	F	16	4F16	FC1	98548	5	BC15	231	Lib5_231_4F16	WTCHG_98548_15_1.fastq.gz	WTCHG_98548_15_2.fastq.gz
4	F	17	4F17	FC1	98548	5	BC16	232	Lib5_232_4F17	WTCHG_98548_16_1.fastq.gz	WTCHG_98548_16_2.fastq.gz
4	F	18	4F18	FC1	98548	5	BC17	233	Lib5_233_4F18	WTCHG_98548_17_1.fastq.gz	WTCHG_98548_17_2.fastq.gz
4	F	19	4F19	FC1	98548	5	BC18	234	Lib5_234_4F19	WTCHG_98548_18_1.fastq.gz	WTCHG_98548_18_2.fastq.gz
4	F	20	4F20	FC1	98549	6	BC1	235	Lib6_235_4F20	WTCHG_98549_01_1.fastq.gz	WTCHG_98549_01_2.fastq.gz
4	F	21	4F21	FC2	107224	15	BC1	109	Lib15_109_4F21	WTCHG_107224_01_1.fastq.gz	WTCHG_107224_01_2.fastq.gz
4	F	22	4F22	FC2	107224	15	BC2	110	Lib15_110_4F22	WTCHG_107224_02_1.fastq.gz	WTCHG_107224_02_2.fastq.gz
4	F	23	4F23	FC1	98549	6	BC2	236	Lib6_236_4F23	WTCHG_98549_02_1.fastq.gz	WTCHG_98549_02_2.fastq.gz
4	F	24	4F24	FC1	98549	6	BC3	237	Lib6_237_4F24	WTCHG_98549_03_1.fastq.gz	WTCHG_98549_03_2.fastq.gz
4	F	25	4F25	FC1	98549	6	BC4	238	Lib6_238_4F25	WTCHG_98549_04_1.fastq.gz	WTCHG_98549_04_2.fastq.gz
4	F	26	4F26	FC1	98549	6	BC5	239	Lib6_239_4F26	WTCHG_98549_05_1.fastq.gz	WTCHG_98549_05_2.fastq.gz
4	F	27	4F27	FC1	98549	6	BC6	240	Lib6_240_4F27	WTCHG_98549_06_1.fastq.gz	WTCHG_98549_06_2.fastq.gz
4	F	28	4F28	FC1	98549	6	BC7	241	Lib6_241_4F28	WTCHG_98549_07_1.fastq.gz	WTCHG_98549_07_2.fastq.gz
4	G	1	4G1	FC1	98549	6	BC8	242	Lib6_242_4G1	WTCHG_98549_08_1.fastq.gz	WTCHG_98549_08_2.fastq.gz
4	G	2	4G2	FC1	98549	6	BC9	243	Lib6_243_4G2	WTCHG_98549_09_1.fastq.gz	WTCHG_98549_09_2.fastq.gz
4	G	3	4G3	FC1	98549	6	BC10	244	Lib6_244_4G3	WTCHG_98549_10_1.fastq.gz	WTCHG_98549_10_2.fastq.gz
4	G	4	4G4	FC1	98549	6	BC11	245	Lib6_245_4G4	WTCHG_98549_11_1.fastq.gz	WTCHG_98549_11_2.fastq.gz
4	G	5	4G5	FC1	98549	6	BC12	246	Lib6_246_4G5	WTCHG_98549_12_1.fastq.gz	WTCHG_98549_12_2.fastq.gz
4	G	6	4G6	FC2	107224	15	BC3	111	Lib15_111_4G6	WTCHG_107224_03_1.fastq.gz	WTCHG_107224_03_2.fastq.gz
4	G	7	4G7	FC1	98549	6	BC13	247	Lib6_247_4G7	WTCHG_98549_13_1.fastq.gz	WTCHG_98549_13_2.fastq.gz
4	G	8	4G8	FC1	98549	6	BC14	248	Lib6_248_4G8	WTCHG_98549_14_1.fastq.gz	WTCHG_98549_14_2.fastq.gz
4	G	9	4G9	FC1	98549	6	BC15	249	Lib6_249_4G9	WTCHG_98549_15_1.fastq.gz	WTCHG_98549_15_2.fastq.gz
4	G	10	4G10	FC1	98549	6	BC16	250	Lib6_250_4G10	WTCHG_98549_16_1.fastq.gz	WTCHG_98549_16_2.fastq.gz
4	G	11	4G11	FC1	98549	6	BC17	251	Lib6_251_4G11	WTCHG_98549_17_1.fastq.gz	WTCHG_98549_17_2.fastq.gz
4	G	12	4G12	FC1	98549	6	BC18	252	Lib6_252_4G12	WTCHG_98549_18_1.fastq.gz	WTCHG_98549_18_2.fastq.gz
4	G	13	4G13	FC2	107224	15	BC4	112	Lib15_112_4G13	WTCHG_107224_04_1.fastq.gz	WTCHG_107224_04_2.fastq.gz
4	G	14	4G14	FC1	98550	7	BC1	253	Lib7_253_4G14	WTCHG_98550_01_1.fastq.gz	WTCHG_98550_01_2.fastq.gz
4	G	15	4G15	FC2	107224	15	BC5	113	Lib15_113_4G15	WTCHG_107224_05_1.fastq.gz	WTCHG_107224_05_2.fastq.gz
4	G	16	4G16	FC1	98550	7	BC2	254	Lib7_254_4G16	WTCHG_98550_02_1.fastq.gz	WTCHG_98550_02_2.fastq.gz
4	G	17	4G17	FC1	98550	7	BC3	255	Lib7_255_4G17	WTCHG_98550_03_1.fastq.gz	WTCHG_98550_03_2.fastq.gz
4	G	18	4G18	FC1	98550	7	BC4	256	Lib7_256_4G18	WTCHG_98550_04_1.fastq.gz	WTCHG_98550_04_2.fastq.gz
4	G	19	4G19	FC2	107224	15	BC6	114	Lib15_114_4G19	WTCHG_107224_06_1.fastq.gz	WTCHG_107224_06_2.fastq.gz
4	G	20	4G20	FC1	98550	7	BC5	257	Lib7_257_4G20	WTCHG_98550_05_1.fastq.gz	WTCHG_98550_05_2.fastq.gz
5	J	1	5J1	FC2	107221	12	BC11	65	Lib12_65_5J1	WTCHG_107221_11_1.fastq.gz	WTCHG_107221_11_2.fastq.gz
5	J	2	5J2	FC2	107221	12	BC12	66	Lib12_66_5J2	WTCHG_107221_12_1.fastq.gz	WTCHG_107221_12_2.fastq.gz
5	J	3	5J3	FC2	107221	12	BC13	67	Lib12_67_5J3	WTCHG_107221_13_1.fastq.gz	WTCHG_107221_13_2.fastq.gz
5	J	4	5J4	FC2	107221	12	BC14	68	Lib12_68_5J4	WTCHG_107221_14_1.fastq.gz	WTCHG_107221_14_2.fastq.gz
5	J	5	5J5	FC2	107221	12	BC15	69	Lib12_69_5J5	WTCHG_107221_15_1.fastq.gz	WTCHG_107221_15_2.fastq.gz
5	J	6	5J6	FC2	107221	12	BC16	70	Lib12_70_5J6	WTCHG_107221_16_1.fastq.gz	WTCHG_107221_16_2.fastq.gz
5	J	7	5J7	FC2	107224	15	BC8	116	Lib15_116_5J7	WTCHG_107224_08_1.fastq.gz	WTCHG_107224_08_2.fastq.gz
5	J	8	5J8	FC2	107224	15	BC9	117	Lib15_117_5J8	WTCHG_107224_09_1.fastq.gz	WTCHG_107224_09_2.fastq.gz
5	J	9	5J9	FC2	107221	12	BC17	71	Lib12_71_5J9	WTCHG_107221_17_1.fastq.gz	WTCHG_107221_17_2.fastq.gz
5	J	10	5J10	FC2	107221	12	BC18	72	Lib12_72_5J10	WTCHG_107221_18_1.fastq.gz	WTCHG_107221_18_2.fastq.gz
5	J	11	5J11	FC2	107222	13	BC1	73	Lib13_73_5J11	WTCHG_107222_01_1.fastq.gz	WTCHG_107222_01_2.fastq.gz
5	J	12	5J12	FC2	107222	13	BC2	74	Lib13_74_5J12	WTCHG_107222_02_1.fastq.gz	WTCHG_107222_02_2.fastq.gz
5	J	13	5J13	FC2	107224	15	BC10	118	Lib15_118_5J13	WTCHG_107224_10_1.fastq.gz	WTCHG_107224_10_2.fastq.gz
5	J	14	5J14	FC2	107224	15	BC11	119	Lib15_119_5J14	WTCHG_107224_11_1.fastq.gz	WTCHG_107224_11_2.fastq.gz
5	J	15	5J15	FC2	107224	15	BC12	120	Lib15_120_5J15	WTCHG_107224_12_1.fastq.gz	WTCHG_107224_12_2.fastq.gz
5	J	16	5J16	FC2	107222	13	BC3	75	Lib13_75_5J16	WTCHG_107222_03_1.fastq.gz	WTCHG_107222_03_2.fastq.gz
5	J	17	5J17	FC2	107222	13	BC4	76	Lib13_76_5J17	WTCHG_107222_04_1.fastq.gz	WTCHG_107222_04_2.fastq.gz
5	J	17	5J17R	FC2	107225	16	BC15	141	Lib16_141_5J17R	WTCHG_107225_15_1.fastq.gz	WTCHG_107225_15_2.fastq.gz	Replicated sample
5	J	18	5J18	FC2	107222	13	BC5	77	Lib13_77_5J18	WTCHG_107222_05_1.fastq.gz	WTCHG_107222_05_2.fastq.gz
5	J	19	5J19	FC2	107222	13	BC6	78	Lib13_78_5J19	WTCHG_107222_06_1.fastq.gz	WTCHG_107222_06_2.fastq.gz
5	J	20	5J20	FC2	107222	13	BC7	79	Lib13_79_5J20	WTCHG_107222_07_1.fastq.gz	WTCHG_107222_07_2.fastq.gz
5	J	21	5J21	FC2	107224	15	BC13	121	Lib15_121_5J21	WTCHG_107224_13_1.fastq.gz	WTCHG_107224_13_2.fastq.gz
5	J	22	5J22	FC2	107222	13	BC8	80	Lib13_80_5J22	WTCHG_107222_08_1.fastq.gz	WTCHG_107222_08_2.fastq.gz
5	J	23	5J23	FC2	107222	13	BC9	81	Lib13_81_5J23	WTCHG_107222_09_1.fastq.gz	WTCHG_107222_09_2.fastq.gz
5	J	24	5J24	FC2	107222	13	BC10	82	Lib13_82_5J24	WTCHG_107222_10_1.fastq.gz	WTCHG_107222_10_2.fastq.gz
5	J	25	5J25	FC2	107222	13	BC11	83	Lib13_83_5J25	WTCHG_107222_11_1.fastq.gz	WTCHG_107222_11_2.fastq.gz
5	J	25	5J25R	FC2	107225	16	BC16	142	Lib16_142_5J25R	WTCHG_107225_16_1.fastq.gz	WTCHG_107225_16_2.fastq.gz	Replicated sample
5	J	26	5J26	FC2	107222	13	BC12	84	Lib13_84_5J26	WTCHG_107222_12_1.fastq.gz	WTCHG_107222_12_2.fastq.gz
5	J	26	5J26R	FC2	107225	16	BC17	143	Lib16_143_5J26R	WTCHG_107225_17_1.fastq.gz	WTCHG_107225_17_2.fastq.gz	Replicated sample
5	J	27	5J27	FC2	107222	13	BC13	85	Lib13_85_5J27	WTCHG_107222_13_1.fastq.gz	WTCHG_107222_13_2.fastq.gz
5	J	27	5J27R	FC2	107225	16	BC18	144	Lib16_144_5J27R	WTCHG_107225_18_1.fastq.gz	WTCHG_107225_18_2.fastq.gz	Replicated sample
