# Supplementary material for: Selfish mutations dysregulating RAS-MAPK signaling are pervasive in aged human testes
Source: Genome Res. 2018 Dec;28(12):1779–90. doi: 10.1101/gr.239186.118 (PMC6280762; doi:10.1101/gr.239186.118)
Supplement: Supplemental Material [file supp_gr.239186.118_Supplemental_Table_S6.xlsx]

## Sheet: Legend
Supplemental Table S6. Table of primers and smMIP sequences used during library amplification and validation
Legend
Sheet		Description
I	RainDance primers	Primers targeting 500 genomic regions designed by RainDance Technologies
II	Validation primers	Primers used for variant validation
III	Validation smMIPs	smMIPs used for variant validation
IV	Library amplification & seq	Details of indexes and common sequences used for library amplification and sequencing

## Sheet: I. RainDance primers
Gene	Category	Amplicon number	Amplicon arget region overlaps another amplicon target region?	Fw primer (with 5' generic RainDanceFw tail)	Rev primer (with 5' generic RainDanceRev tail)	Amplicon coordinates	Amplicon-Length	Amplicon-%GC	target region coordinates (hg19)
MTOR	Test	1	No	CGCTCTTCCGATCTCTGCACACATGCCATCATTCTAGG	TGCTCTTCCGATCTGACTGACAAGAAAATGGACACCA	chr1:11217180-11217289	110	56	Chr1:11217201-11217269
NRAS	RTK RAS-MAPK	2	Yes	CGCTCTTCCGATCTCTGCCAAGAAACCATATGCTCACC	TGCTCTTCCGATCTGACCTTTTATAGGGTGTTGAAGATGC	chr1:115251132-115251284	153	42	Chr1:115251153-115251261							F primer (with 5' RainDanceFw tail)
NRAS	RTK RAS-MAPK	3	Yes	CGCTCTTCCGATCTCTGTTCATTCGGTACTGGCGTAT	TGCTCTTCCGATCTGACAGATACAAATGCAAGAGAGCTTA	chr1:115251220-115251359	140	35	Chr1:115251240-115251336
NRAS	RTK RAS-MAPK	4	Yes	CGCTCTTCCGATCTCTGCAAACTCTTGCACAAATGCTG	TGCTCTTCCGATCTGACCCTATGGTGCTAGTGGGAAA	chr1:115252154-115252312	159	45	Chr1:115252175-115252292
NRAS	RTK RAS-MAPK	5	Yes	CGCTCTTCCGATCTCTGTGGAATCCCGTAACTCTTGG	TGCTCTTCCGATCTGACCGCTCTTCCGATCTCTGTAATCTTGTT	chr1:115252220-115252405	186	41	Chr1:115252240-115252384
NRAS	RTK RAS-MAPK	6	Yes	CGCTCTTCCGATCTCTGTGGTAACCTCATTTCCCCAT	TGCTCTTCCGATCTGACAGAGTACAGTGCCATGAGAG	chr1:115256348-115256525	178	41	Chr1:115256368-115256505
NRAS	RTK RAS-MAPK	7	Yes	CGCTCTTCCGATCTCTGCAAATACACAGAGGAAGCCT	TGCTCTTCCGATCTGACACAAGTGGTTATAGATGGTGAAAC	chr1:115256464-115256585	122	45	Chr1:115256484-115256561
NRAS	RTK RAS-MAPK	8	Yes	CGCTCTTCCGATCTCTGTATTGGTCTCTCATGGCACT	TGCTCTTCCGATCTGACCCTCCCTGCCCCCTTAC	chr1:115256499-115256631	133	48	Chr1:115256519-115256614
NRAS	RTK RAS-MAPK	9	No	CGCTCTTCCGATCTCTGATCCGACAAGTGAGAGACAG	TGCTCTTCCGATCTGACACTGGTTTCCAACAGGTTCT	chr1:115258619-115258813	195	50	Chr1:115258639-115258793
NOTCH2	Test	10	Yes	CGCTCTTCCGATCTCTGTAGGGCTGGTGGTCACATC	TGCTCTTCCGATCTGACCCCCTTCACAGCACAGTTAT	chr1:120458015-120458188	174	55	Chr1:120458034-120458168
NOTCH2	Test	11	Yes	CGCTCTTCCGATCTCTGACTGTGACTGGGTGTTCG	TGCTCTTCCGATCTGACGTACCAGATTCCAGAAATGGC	chr1:120458130-120458328	199	56	Chr1:120458148-120458307
NOTCH2	Test	12	Yes	CGCTCTTCCGATCTCTGGGGAGAATGGTCTGAGCTAC	TGCTCTTCCGATCTGACGACTTTCCAGCTCATCCCTA	chr1:120458233-120458430	198	62	Chr1:120458253-120458410
NOTCH2	Test	13	No	CGCTCTTCCGATCTCTGGGAATCTGGTACATGGTGGG	TGCTCTTCCGATCTGACCCATCCTGGCATAGCTCC	chr1:120458317-120458511	195	63	Chr1:120458337-120458493
NOTCH2	Test	14	Yes	CGCTCTTCCGATCTCTGGAGCTGGAAAGTCACAATGG	TGCTCTTCCGATCTGACGTCCCAGCAGATTGGATGAA	chr1:120458418-120458600	183	57	Chr1:120458438-120458580
NOTCH2	Test	15	Yes	CGCTCTTCCGATCTCTGGGAGCTATGCCAGGATGG	TGCTCTTCCGATCTGACTCAGTGAGCCAGTTGCTATC	chr1:120458494-120458687	194	55	Chr1:120458512-120458667
NOTCH2	Test	16	Yes	CGCTCTTCCGATCTCTGTGGAGACACAATGTGGTGG	TGCTCTTCCGATCTGACTGGGATCTTACAGGCCTCA	chr1:120458646-120458826	181	55	Chr1:120458665-120458807
NOTCH2	Test	17	Yes	CGCTCTTCCGATCTCTGGATAGTGCATGCTGGGCA	TGCTCTTCCGATCTGACTCTCTGAGTGAGAAGGTCCA	chr1:120458746-120458945	200	52	Chr1:120458764-120458925
NOTCH2	Test	18	Yes	CGCTCTTCCGATCTCTGGAGAGGATGTGGTGTCGG	TGCTCTTCCGATCTGACGCCAAGAGTACCATGCCTA	chr1:120458843-120459023	181	49	Chr1:120458861-120459004
NOTCH2	Test	19	Yes	CGCTCTTCCGATCTCTGTTCAGAACAGTCCCTCCTCT	TGCTCTTCCGATCTGACTTATGCAGGACCTCGTTGTG	chr1:120510005-120510168	164	50	Chr1:120510025-120510148
NOTCH2	Test	20	Yes	CGCTCTTCCGATCTCTGGTCTGAATGGCACTCATTGAT	TGCTCTTCCGATCTGACTTGTGGAAACTCAACTGCTT	chr1:120510120-120510296	177	46	Chr1:120510141-120510276
NOTCH2	Test	21	Yes	CGCTCTTCCGATCTCTGGCTCAACAGACACTTCACAG	TGCTCTTCCGATCTGACATCAGCAATCCTTGCCACAA	chr1:120510655-120510826	172	49	Chr1:120510675-120510806
NOTCH2	Test	22	Yes	CGCTCTTCCGATCTCTGATATTGCCCATTTAGGGGGT	TGCTCTTCCGATCTGACAGAGAAAGCTCTTCCCCAAG	chr1:120510767-120510921	155	50	Chr1:120510787-120510901
SKI	Test	23	No	CGCTCTTCCGATCTCTGAAGACGCTGGAGCAGTTC	TGCTCTTCCGATCTGACCTTGGCGCTCTCCTTCT	chr1:2160260-2160364	105	67	Chr1:2160278-2160347
AKT3	Test	24	No	CGCTCTTCCGATCTCTGAAGAGCTAGGACTGGTGATG	TGCTCTTCCGATCTGACTAGATGTTTCCTGCCCACAG	chr1:243668470-243668656	187	43	Chr1:243668490-243668636
AKT3	Test	25	Yes	CGCTCTTCCGATCTCTGAAATAATGAAAATACTACCATGCAAAT	TGCTCTTCCGATCTGACCGTTTGTGTTTTGTGATGGA	chr1:243776923-243777011	89	35	Chr1:243776950-243776991
AKT3	Test	26	Yes	CGCTCTTCCGATCTCTGCCTCGCCCCCATTAACAT	TGCTCTTCCGATCTGACCTTGAAATATTCCTTCCAGACAAAA	chr1:243776972-243777039	68	41	Chr1:243776990-243777014
COX15	Neutral Test	27	No	CGCTCTTCCGATCTCTGTCTCAAAAGCAGTCACAGTC	TGCTCTTCCGATCTGACTGCCTTCTTTCCTTTGTGAC	chr10:101474301-101474497	197	53	Chr10:101474321-101474477
COX15	Neutral Test	28	No	CGCTCTTCCGATCTCTGGGGGATACTGTCAGAACAAAA	TGCTCTTCCGATCTGACAGAAACCTGGCACTTCTATCT	chr10:101476069-101476267	199	46	Chr10:101476090-101476246
COX15	Neutral Test	29	No	CGCTCTTCCGATCTCTGCCATGGTGGGATTCTCAAAA	TGCTCTTCCGATCTGACCAGAACTAGTATTTGGTCTCTTCTT	chr10:101478126-101478321	196	44	Chr10:101478146-101478296
COX15	Neutral Test	30	No	CGCTCTTCCGATCTCTGGCAGCAGGCAGGATGTA	TGCTCTTCCGATCTGACGACTGAGAAAGAAAGGTTTTGC	chr10:101486804-101487003	200	43	Chr10:101486821-101486981
COX15	Neutral Test	31	No	CGCTCTTCCGATCTCTGTCAACCTGTGCTTCTACTGA	TGCTCTTCCGATCTGACCCATCTCTGAAGTAGCTTTGC	chr10:101489251-101489448	198	51	Chr10:101489271-101489427
SHOC2	RTK RAS-MAPK	32	No	CGCTCTTCCGATCTCTGCTGGAAAATAAAAGGAGTTCATGT	TGCTCTTCCGATCTGACGCATCTTTCCCTTTGGTCTT	chr10:112724068-112724265	198	39	Chr10:112724092-112724245
FGFR2	RTK RAS-MAPK	33	Yes	CGCTCTTCCGATCTCTGAAGTGGAGACAACAAGCTCT	TGCTCTTCCGATCTGACGTTCTTCAGGAGATGATTCTGT	chr10:123239275-123239468	194	49	Chr10:123239295-123239446
FGFR2	RTK RAS-MAPK	34	Yes	CGCTCTTCCGATCTCTGATACTGAGGAAGGCATGGTT	TGCTCTTCCGATCTGACTCACCTTGTTATCCTGACCC	chr10:123239401-123239591	191	43	Chr10:123239421-123239571
FGFR2	RTK RAS-MAPK	35	No	CGCTCTTCCGATCTCTGCAGGAAAAAGCCAGAGAAAAGA	TGCTCTTCCGATCTGACAGTTTTTGCATTTTCCTCTACAT	chr10:123246835-123246967	133	45	Chr10:123246857-123246944
FGFR2	RTK RAS-MAPK	36	No	CGCTCTTCCGATCTCTGCATTCTGAGCCTCACCCC	TGCTCTTCCGATCTGACTCTTGATTTCAGTGTATTCATCG	chr10:123247452-123247639	188	42	Chr10:123247470-123247616
FGFR2	RTK RAS-MAPK	37	Yes	CGCTCTTCCGATCTCTGCCAAGTAGAATGTGAAAGACTCA	TGCTCTTCCGATCTGACAAAGGCAACCTCCGAGAATA	chr10:123256022-123256204	183	53	Chr10:123256045-123256184
FGFR2	RTK RAS-MAPK	38	Yes	CGCTCTTCCGATCTCTGCATGACACCAAGTCCTTGAA	TGCTCTTCCGATCTGACCTCTCTTTAGGGAGCTTCTCTT	chr10:123256092-123256270	179	51	Chr10:123256112-123256248
FGFR2	RTK RAS-MAPK	39	No	CGCTCTTCCGATCTCTGTTGGGCGAATGCAGTTTTTC	TGCTCTTCCGATCTGACTAGCTGCCCATGAGTTAGAG	chr10:123257978-123258177	200	42	Chr10:123257998-123258157
FGFR2	RTK RAS-MAPK	40	No	CGCTCTTCCGATCTCTGCCTCCCCGAGCCTCC	TGCTCTTCCGATCTGACGATGCTATGTGCTAATCCCC	chr10:123260310-123260496	187	57	Chr10:123260325-123260476
FGFR2	RTK RAS-MAPK	41	Yes	CGCTCTTCCGATCTCTGTGGGACATGGCCAAGAG	TGCTCTTCCGATCTGACTTTTGTATCCAGGTTTCGGC	chr10:123263277-123263467	191	52	Chr10:123263294-123263447
FGFR2	RTK RAS-MAPK	42	Yes	CGCTCTTCCGATCTCTGTTGAAGAGAGGCGTGTTGT	TGCTCTTCCGATCTGACCCCCAACCCATTCCTTTCTA	chr10:123263383-123263565	183	51	Chr10:123263402-123263545
FGFR2	RTK RAS-MAPK	43	Yes	CGCTCTTCCGATCTCTGGGTCATGGGGGAGGAGT	TGCTCTTCCGATCTGACAATCGCCTGTATGGTGGTAA	chr10:123274585-123274757	173	49	Chr10:123274602-123274737
FGFR2	RTK RAS-MAPK	44	Yes	CGCTCTTCCGATCTCTGGTGTTCTTCATTCGGCACAG	TGCTCTTCCGATCTGACCTATGATGCGTCAGTCTGGT	chr10:123274710-123274907	198	48	Chr10:123274730-123274887
FGFR2	RTK RAS-MAPK	45	Yes	CGCTCTTCCGATCTCTGACCCAGAGAGAAAGAACAGTAT	TGCTCTTCCGATCTGACTTGCTTCCCTTGTTTTCTAGG	chr10:123276807-123276997	191	45	Chr10:123276829-123276976
FGFR2	RTK RAS-MAPK	46	Yes	CGCTCTTCCGATCTCTGCAGCGTCCTCAAAAGTTACA	TGCTCTTCCGATCTGACCTTTTGCTTCCCTTGTTTTCT	chr10:123276905-123277000	96	45	Chr10:123276925-123276979
FGFR2	RTK RAS-MAPK	47	No	CGCTCTTCCGATCTCTGACAAAAATGAAAGCATTGTTACC	TGCTCTTCCGATCTGACATATTGTTCTCCTGTGTCTGTT	chr10:123278174-123278369	196	45	Chr10:123278197-123278347
FGFR2	RTK RAS-MAPK	48	Yes	CGCTCTTCCGATCTCTGGTTGTGGGTACCTTTAGATTCA	TGCTCTTCCGATCTGACCCAAGCCGGACTGCC	chr10:123279459-123279658	200	55	Chr10:123279481-123279643
FGFR2	RTK RAS-MAPK	49	Yes	CGCTCTTCCGATCTCTGCCGTATTTACTGCCGTTCTT	TGCTCTTCCGATCTGACTCTTCCCTCTCTCCACCA	chr10:123279527-123279702	176	57	Chr10:123279547-123279684
FGFR2	RTK RAS-MAPK	50	Yes	CGCTCTTCCGATCTCTGTGGGCATCACTGTAAACCTT	TGCTCTTCCGATCTGACGGTCTCTCATTCTCCCATCC	chr10:123279578-123279734	157	58	Chr10:123279598-123279714
FGFR2	RTK RAS-MAPK	51	Yes	CGCTCTTCCGATCTCTGTGCTTTCAAACGAGTCAAGC	TGCTCTTCCGATCTGACTTTCAGGTACGAAACCAGCA	chr10:123298039-123298235	197	49	Chr10:123298059-123298215
FGFR2	RTK RAS-MAPK	52	Yes	CGCTCTTCCGATCTCTGTCAGATGGGACCACACTTTC	TGCTCTTCCGATCTGACTCCATACCTTTCTTGCCTCC	chr10:123298180-123298337	158	41	Chr10:123298200-123298317
FGFR2	RTK RAS-MAPK	53	Yes	CGCTCTTCCGATCTCTGGTGATGTTCTGAAAGCTTAATTCT	TGCTCTTCCGATCTGACACAGGAGCACCATACTGGA	chr10:123310778-123310977	200	53	Chr10:123310802-123310958
FGFR2	RTK RAS-MAPK	54	Yes	CGCTCTTCCGATCTCTGCCTTCCCGTTTTTCAGCC	TGCTCTTCCGATCTGACGAGTTTACTCATGGAGGGGA	chr10:123310839-123311036	198	52	Chr10:123310857-123311016
FGFR2	RTK RAS-MAPK	55	No	CGCTCTTCCGATCTCTGCCTCTCTCGGGGACCA	TGCTCTTCCGATCTGACTCCATGGAATATGTTCTTTTGC	chr10:123323978-123324121	144	48	Chr10:123323994-123324099
FGFR2	RTK RAS-MAPK	56	No	CGCTCTTCCGATCTCTGAGAGCATAGTGCTGGCG	TGCTCTTCCGATCTGACACAGTGCTTATTGGGGAGTA	chr10:123324924-123325075	152	51	Chr10:123324941-123325055
RET	RTK RAS-MAPK	57	No	CGCTCTTCCGATCTCTGCTGAGTGGGCTACGTCTG	TGCTCTTCCGATCTGACGAGACCTCTGTGGGGCT	chr10:43608979-43609176	198	65	Chr10:43608997-43609159
RET	RTK RAS-MAPK	58	Yes	CGCTCTTCCGATCTCTGCAAGCCTCACACCACCC	TGCTCTTCCGATCTGACGCCTCCGGAAGGTCATC	chr10:43609901-43610083	183	60	Chr10:43609918-43610066
RET	RTK RAS-MAPK	59	Yes	CGCTCTTCCGATCTCTGATCCACTGCTACCACAAGTT	TGCTCTTCCGATCTGACGATCTTCCCTGCCCCG	chr10:43610017-43610213	197	63	Chr10:43610037-43610197
RET	RTK RAS-MAPK	60	Yes	CGCTCTTCCGATCTCTGATCCTCACACTTTTCCCCC	TGCTCTTCCGATCTGACCTTTCAGCATCTTCACGGC	chr10:43611981-43612179	199	50	Chr10:43612000-43612160
RET	RTK RAS-MAPK	61	Yes	CGCTCTTCCGATCTCTGAGGCGAATTTGGAAAAGTGG	TGCTCTTCCGATCTGACTCTTCAGGGTCCCATGCT	chr10:43612091-43612271	181	63	Chr10:43612111-43612253
RET	RTK RAS-MAPK	62	Yes	CGCTCTTCCGATCTCTGGGTATGGTCATGGAAGGGG	TGCTCTTCCGATCTGACCTGGCCTTACCATCCTGG	chr10:43613757-43613938	182	56	Chr10:43613776-43613920
RET	RTK RAS-MAPK	63	Yes	CGCTCTTCCGATCTCTGGACCTGCTGTCAGAGTTCA	TGCTCTTCCGATCTGACCAGGAGCAGTAGGGAAAGG	chr10:43613847-43614028	182	58	Chr10:43613866-43614009
RET	RTK RAS-MAPK	64	Yes	CGCTCTTCCGATCTCTGTGGAAGACCCAAGCTGC	TGCTCTTCCGATCTGACACTTTGCGGCTCTCGC	chr10:43614923-43615051	129	68	Chr10:43614940-43615035
RET	RTK RAS-MAPK	65	Yes	CGCTCTTCCGATCTCTGTACGCCAAATACGGCTCC	TGCTCTTCCGATCTGACCAGGCAAATGAGATGAGGTC	chr10:43615002-43615153	152	66	Chr10:43615020-43615133
RET	RTK RAS-MAPK	66	Yes	CGCTCTTCCGATCTCTGGCGAGAGCCGCAAAG	TGCTCTTCCGATCTGACCTGGGTGCAGAGCCAT	chr10:43615036-43615219	184	63	Chr10:43615051-43615203
RET	RTK RAS-MAPK	67	Yes	CGCTCTTCCGATCTCTGCAGGCTGAGCCAGTGAC	TGCTCTTCCGATCTGACCCTGGCTCCTCTTCACGTA	chr10:43615463-43615652	190	55	Chr10:43615480-43615633
RET	RTK RAS-MAPK	68	No	CGCTCTTCCGATCTCTGCGGATTTCGGCTTGTCC	TGCTCTTCCGATCTGACGAGCTCCACTAATCTTCGGT	chr10:43615593-43615759	167	59	Chr10:43615610-43615739
RET	RTK RAS-MAPK	69	No	CGCTCTTCCGATCTCTGGAGTTAGAGTAACTTCAATGTCTTT	TGCTCTTCCGATCTGACGAGAGCAACACCCACAC	chr10:43617351-43617485	135	40	Chr10:43617376-43617468
RET	RTK RAS-MAPK	70	Yes	CGCTCTTCCGATCTCTGACTGGTCCTTTCACTCTCT	TGCTCTTCCGATCTGACCATCTCCTCGCTGCAGTT	chr10:43619096-43619257	162	57	Chr10:43619115-43619239
RET	RTK RAS-MAPK	71	Yes	CGCTCTTCCGATCTCTGGATGGTCTTTTGGTGTCCTG	TGCTCTTCCGATCTGACACAGATGTCCCCTCCCTTC	chr10:43619118-43619311	194	59	Chr10:43619138-43619292
RET	RTK RAS-MAPK	72	No	CGCTCTTCCGATCTCTGTGGATCATATTGGCCTGTCT	TGCTCTTCCGATCTGACTTGTGGGAATTGGACCCAG	chr10:43620297-43620457	161	54	Chr10:43620317-43620438
RET	RTK RAS-MAPK	73	No	CGCTCTTCCGATCTCTGCCGGCCATCTCTGTCTTC	TGCTCTTCCGATCTGACAGAATCTAGTAAATGCATGGGAA	chr10:43622002-43622200	199	52	Chr10:43622020-43622177
KAT6B	Test	74	Yes	CGCTCTTCCGATCTCTGGTTGCCCATGGTTATGCTTT	TGCTCTTCCGATCTGACCTCTCTTTGTTTTGCCTCCA	chr10:76788183-76788376	194	40	Chr10:76788203-76788356
KAT6B	Test	75	Yes	CGCTCTTCCGATCTCTGAAACAAGTGTGGCCAAAAGG	TGCTCTTCCGATCTGACCTCAATCCTGATGGGACTGG	chr10:76788315-76788506	192	48	Chr10:76788335-76788486
KAT6B	Test	76	Yes	CGCTCTTCCGATCTCTGAAACACCCATGGAGCCTG	TGCTCTTCCGATCTGACTGTGTTTGGACTTACAGGGG	chr10:76788415-76788593	179	50	Chr10:76788433-76788573
KAT6B	Test	77	No	CGCTCTTCCGATCTCTGGGATGAAGAGCCATCCCAC	TGCTCTTCCGATCTGACTCCATTAAGACCTCTGGGTT	chr10:76788824-76789009	186	50	Chr10:76788843-76788989
PTEN	Test	78	No	CGCTCTTCCGATCTCTGTCCTTTTTCTTCAGCCACAG	TGCTCTTCCGATCTGACGGTAAAGAGGAGCAGCCG	chr10:89624197-89624336	140	45	Chr10:89624217-89624318
PTEN	Test	79	No	CGCTCTTCCGATCTCTGGCATATTTCAGATATTTCTTTCCTTAACT	TGCTCTTCCGATCTGACAAACACAACATGAATATAAACATCAAT	chr10:89653742-89653923	182	29	Chr10:89653771-89653896
PTEN	Test	80	No	CGCTCTTCCGATCTCTGTAATGGTGGCTTTTTGTTTGT	TGCTCTTCCGATCTGACCTCTAACAAGCAGATAACTTTCAC	chr10:89685234-89685393	160	27	Chr10:89685255-89685369
PTEN	Test	81	No	CGCTCTTCCGATCTCTGTTTCTTCCTAAGTGCAAAAGATAA	TGCTCTTCCGATCTGACATACAGTCTATCGGGTTTAAGTT	chr10:89690749-89690900	152	31	Chr10:89690773-89690877
PTEN	Test	82	No	CGCTCTTCCGATCTCTGCTTATTCTGAGGTTATCTTTTTACCA	TGCTCTTCCGATCTGACTCACAAAAGGGTTTGATAAGTTC	chr10:89692741-89692833	93	37	Chr10:89692767-89692810
PTEN	Test	83	Yes	CGCTCTTCCGATCTCTGAACCCACCACAGCTAGAA	TGCTCTTCCGATCTGACTTAAAAATTTGCCCCGATGTAA	chr10:89692796-89692955	160	38	Chr10:89692814-89692933
PTEN	Test	84	Yes	CGCTCTTCCGATCTCTGCTAGAACTTATCAAACCCTTTTGT	TGCTCTTCCGATCTGACAGGGCCTCTTGTGCCT	chr10:89692808-89692971	164	39	Chr10:89692832-89692955
PTEN	Test	85	No	CGCTCTTCCGATCTCTGTTATTACATCGGGGCAAATTTTTA	TGCTCTTCCGATCTGACCCAGGAAGAGGAAAGGAAAAAC	chr10:89692931-89693047	117	38	Chr10:89692955-89693025
PTEN	Test	86	Yes	CGCTCTTCCGATCTCTGAGTGAAATAACTATAATGGAACATTTTT	TGCTCTTCCGATCTGACCGCCACTGAACATTGGAATAG	chr10:89711811-89712007	197	36	Chr10:89711839-89711986
PTEN	Test	87	Yes	CGCTCTTCCGATCTCTGTTTTTCTGTCCACCAGGGAG	TGCTCTTCCGATCTGACTCCAATACATGGAAGGATGAGA	chr10:89711859-89712053	195	40	Chr10:89711879-89712031
PTEN	Test	88	Yes	CGCTCTTCCGATCTCTGTCGTTTTTGACAGTTTGACAGT	TGCTCTTCCGATCTGACCCACACACAGGTAACGGC	chr10:89717540-89717727	188	43	Chr10:89717562-89717709
PTEN	Test	89	Yes	CGCTCTTCCGATCTCTGAAGGTGAAGATATATTCCTCCAAT	TGCTCTTCCGATCTGACAGCTTTTAATCTGTCCTTATTTTGG	chr10:89717636-89717832	197	39	Chr10:89717660-89717807
PTEN	Test	90	Yes	CGCTCTTCCGATCTCTGtGTCATTTCAtttctttttcttttctt	TGCTCTTCCGATCTGACGCACGCTCTATACTGCAAAT	chr10:89720609-89720775	167	32	Chr10:89720636-89720755
PTEN	Test	91	Yes	CGCTCTTCCGATCTCTGCATACCAGGACCAGAGGAAA	TGCTCTTCCGATCTGACTTAACTGACCTTAAAATTTGGAGAA	chr10:89720686-89720884	199	34	Chr10:89720706-89720859
PTEN	Test	92	Yes	CGCTCTTCCGATCTCTGGTGCAGATAATGACAAGGAATATC	TGCTCTTCCGATCTGACGTCAAGCAAGTTCTTCATCAG	chr10:89720772-89720971	200	33	Chr10:89720796-89720950
PTEN	Test	93	Yes	CGCTCTTCCGATCTCTGTGTGGGTTTTCATTTTAAATTTTCTT	TGCTCTTCCGATCTGACCAGAGTCAGTGGTGTCAGAA	chr10:89725011-89725173	163	39	Chr10:89725037-89725153
PTEN	Test	94	Yes	CGCTCTTCCGATCTCTGAATCCAGAGGCTAGCAGTTC	TGCTCTTCCGATCTGACTTTCATGGTGTTTTATCCCTCT	chr10:89725083-89725265	183	35	Chr10:89725103-89725243
ZBTB16	Test	95	Yes	CGCTCTTCCGATCTCTGCCAGAAGGAAAGAAAGCCTC	TGCTCTTCCGATCTGACTGTCCACCATGATGACCAC	chr11:113933980-113934146	167	58	Chr11:113934000-113934127
ZBTB16	Test	96	Yes	CGCTCTTCCGATCTCTGCTACTGTGCAAGGCCAAC	TGCTCTTCCGATCTGACATCTGCTGGAAGGTCTTTGG	chr11:113934080-113934270	191	56	Chr11:113934098-113934250
ZBTB16	Test	97	Yes	CGCTCTTCCGATCTCTGCACCAGCAAGATGTTTGAGA	TGCTCTTCCGATCTGACTTCCTCCAGGTACTCGATCT	chr11:113934184-113934370	187	52	Chr11:113934204-113934350
ZBTB16	Test	98	Yes	CGCTCTTCCGATCTCTGCACGCTGCAAGCCAAG	TGCTCTTCCGATCTGACATGTTCTTGAGGTACCGAGC	chr11:113934292-113934489	198	60	Chr11:113934308-113934469
ZBTB16	Test	99	Yes	CGCTCTTCCGATCTCTGATCCTGGAGATCGAGTACCT	TGCTCTTCCGATCTGACCCAGCCACACTGGCATAC	chr11:113934344-113934540	197	58	Chr11:113934364-113934522
ZBTB16	Test	100	Yes	CGCTCTTCCGATCTCTGGCTCGGTACCTCAAGAACA	TGCTCTTCCGATCTGACGGTCATCAAACTGTCCACTG	chr11:113934470-113934646	177	55	Chr11:113934489-113934626
ZBTB16	Test	101	Yes	CGCTCTTCCGATCTCTGTTTGGTCTTTCAGCCATGAG	TGCTCTTCCGATCTGACCTCATCCACCTGCATCATCT	chr11:113934593-113934772	180	60	Chr11:113934613-113934752
ZBTB16	Test	102	Yes	CGCTCTTCCGATCTCTGCAGGGAACTCTTCAGCCAC	TGCTCTTCCGATCTGACTTGCCTCTTTCCTCAACCTT	chr11:113934665-113934852	188	64	Chr11:113934684-113934832
ZBTB16	Test	103	Yes	CGCTCTTCCGATCTCTGGATGCAGGTGGATGAGGT	TGCTCTTCCGATCTGACGGTGGCACCTGCTCG	chr11:113934757-113934945	189	63	Chr11:113934775-113934930
ZBTB16	Test	104	Yes	CGCTCTTCCGATCTCTGCATCACCAGTGCTAGGGAG	TGCTCTTCCGATCTGACAAGACGGCATGCTCAATACA	chr11:113934886-113935073	188	63	Chr11:113934905-113935053
ZBTB16	Test	105	Yes	CGCTCTTCCGATCTCTGTGAGAAGCATCTGGGCATC	TGCTCTTCCGATCTGACAACAGCTCCCTCTGGATGAA	chr11:113935003-113935176	174	60	Chr11:113935022-113935156
ZBTB16	Test	106	Yes	CGCTCTTCCGATCTCTGTGTATTGAGCATGCCGTCT	TGCTCTTCCGATCTGACCTGCACTGCTCTCCGAT	chr11:113935054-113935242	189	62	Chr11:113935073-113935225
ZBTB16	Test	107	Yes	CGCTCTTCCGATCTCTGCATCCAGAGGGAGCTGTTC	TGCTCTTCCGATCTGACCCTCAAGTCCTACATCAGGT	chr11:113935159-113935332	174	62	Chr11:113935178-113935312
ZBTB16	Test	108	No	CGCTCTTCCGATCTCTGAGCAACCTCTCTTTTCCTTT	TGCTCTTCCGATCTGACTGTATCTGAACGGGCCA	chr11:114027030-114027192	163	53	Chr11:114027050-114027175
ZBTB16	Test	109	No	CGCTCTTCCGATCTCTGTAGTGGTAACTGCCTCTCCT	TGCTCTTCCGATCTGACTGGAGAACAGGAATCCAAGT	chr11:114057645-114057788	144	52	Chr11:114057665-114057768
ZBTB16	Test	110	Yes	CGCTCTTCCGATCTCTGACCTTGTATTCCCACCTTTCT	TGCTCTTCCGATCTGACCGTTTGAGAGCCGTGTG	chr11:114112840-114113039	200	62	Chr11:114112861-114113022
ZBTB16	Test	111	Yes	CGCTCTTCCGATCTCTGTGTCTGCTGTGTGGGAAG	TGCTCTTCCGATCTGACCCATCAGCTGGACTGACC	chr11:114112909-114113080	172	62	Chr11:114112927-114113062
ZBTB16	Test	112	Yes	CGCTCTTCCGATCTCTGGAGAGGCAAAGGCCTGAT	TGCTCTTCCGATCTGACTGATGCTTGAGGCTGAACT	chr11:114117882-114118058	177	57	Chr11:114117900-114118039
ZBTB16	Test	113	Yes	CGCTCTTCCGATCTCTGTCCACACGGGTGAGAAAC	TGCTCTTCCGATCTGACCCTGGGATCATCCTCACTTA	chr11:114117995-114118187	193	58	Chr11:114118013-114118167
ZBTB16	Test	114	Yes	CGCTCTTCCGATCTCTGTGTCTGTCCTCACTTTCTCC	TGCTCTTCCGATCTGACTACTCTGTGCAGATGGTGC	chr11:114121006-114121168	163	60	Chr11:114121026-114121149
ZBTB16	Test	115	Yes	CGCTCTTCCGATCTCTGGCACCTGAGAACGCACA	TGCTCTTCCGATCTGACACACATAGCACAGGTAGAGG	chr11:114121112-114121275	164	59	Chr11:114121129-114121255
ZBTB16	Test	116	Yes	CGCTCTTCCGATCTCTGGCCCGACTGGAGGATAG	TGCTCTTCCGATCTGACGAGAGAATCCAAGGCCAAAA	chr11:114121229-114121428	200	49	Chr11:114121246-114121408
HMBS	Neutral Test	117	No	CGCTCTTCCGATCTCTGTGGCTGCTCATACCCTTT	TGCTCTTCCGATCTGACGCCCCTTACTTGCAAGACT	chr11:118960346-118960494	149	54	Chr11:118960364-118960475
HMBS	Neutral Test	118	No	CGCTCTTCCGATCTCTGGTCCTTAGCAACTCTCCACA	TGCTCTTCCGATCTGACACTGTAAGGCAGAAAGGAGA	chr11:118962102-118962294	193	61	Chr11:118962122-118962274
HMBS	Neutral Test	119	No	CGCTCTTCCGATCTCTGTGTCCTAGGATGTTTTTCCATC	TGCTCTTCCGATCTGACCTTTCCCAGCTCTCCAAGT	chr11:118963090-118963286	197	60	Chr11:118963112-118963267
HMBS	Neutral Test	120	Yes	CGCTCTTCCGATCTCTGGTTCTCACCAAATCCCACCT	TGCTCTTCCGATCTGACATGTTTTTGGCTCCTTTGCT	chr11:118963785-118963956	172	54	Chr11:118963805-118963936
HMBS	Neutral Test	121	Yes	CGCTCTTCCGATCTCTGACAGTTGGTAGGCATCACTG	TGCTCTTCCGATCTGACATCTGTGCCCCACAAACC	chr11:118963846-118964013	168	53	Chr11:118963866-118963995
CBL	RTK RAS-MAPK	122	Yes	CGCTCTTCCGATCTCTGTGCAGTTATTTATTCAACTAATAGTCTTT	TGCTCTTCCGATCTGACTCGCTGTTTAGATCCGTACC	chr11:119148828-119149026	199	36	Chr11:119148857-119149006
CBL	RTK RAS-MAPK	123	Yes	CGCTCTTCCGATCTCTGGGCTCCACATTCCAACTATG	TGCTCTTCCGATCTGACAGTCGCTGTTTAGATCCGTA	chr11:119148903-119149028	126	44	Chr11:119148923-119149008
CBL	RTK RAS-MAPK	124	Yes	CGCTCTTCCGATCTCTGTGCATCTGTTACTATCTTTTGC	TGCTCTTCCGATCTGACTCAGCTCGTTCATCATCATC	chr11:119149187-119149383	197	48	Chr11:119149209-119149363
CBL	RTK RAS-MAPK	125	Yes	CGCTCTTCCGATCTCTGGAGGGAGTGGCAGCCT	TGCTCTTCCGATCTGACTCACAATGGATTTTGCCAGT	chr11:119149302-119149463	162	48	Chr11:119149318-119149443
HRAS	RTK RAS-MAPK	126	No	CGCTCTTCCGATCTCTGCTGGGAGTCCCCCTCAC	TGCTCTTCCGATCTGACGATCCCATCCCTCCTTTCC	chr11:532614-532777	164	61	Chr11:532631-532758
HRAS	RTK RAS-MAPK	127	No	CGCTCTTCCGATCTCTGTCCCGGGAGACTTACAGC	TGCTCTTCCGATCTGACCTCACTGACCCTCTCCCT	chr11:533262-533384	123	69	Chr11:533280-533366
HRAS	RTK RAS-MAPK	128	Yes	CGCTCTTCCGATCTCTGCTAGCTGTGGGGTGGAGA	TGCTCTTCCGATCTGACGATCAAACGGGTGAAGGACT	chr11:533425-533606	182	62	Chr11:533443-533586
HRAS	RTK RAS-MAPK	129	Yes	CGCTCTTCCGATCTCTGGAGCCTGCCGAGATTCC	TGCTCTTCCGATCTGACGTAGCCAGCTCTCGCTTT	chr11:533512-533641	130	60	Chr11:533529-533623
HRAS	RTK RAS-MAPK	130	Yes	CGCTCTTCCGATCTCTGAGCCTCACGGGGTTCA	TGCTCTTCCGATCTGACGTGGTCATTGATGGGGAGAC	chr11:533749-533926	178	58	Chr11:533765-533906
HRAS	RTK RAS-MAPK	131	Yes	CGCTCTTCCGATCTCTGGATGTCCTCAAAAGACTTGGT	TGCTCTTCCGATCTGACCTGAGCCCTGTCCTCCT	chr11:533777-533965	189	58	Chr11:533798-533948
HRAS	RTK RAS-MAPK	132	Yes	CGCTCTTCCGATCTCTGCCTATCCTGGCTGTGTCCT	TGCTCTTCCGATCTGACGAGGAGCGATGACGGAAT	chr11:534143-534330	188	62	Chr11:534162-534312
HRAS	RTK RAS-MAPK	133	Yes	CGCTCTTCCGATCTCTGGGGTCGTATTCGTCCACA	TGCTCTTCCGATCTGACGACCCTGTAGGAGGACCC	chr11:534222-534364	143	62	Chr11:534240-534346
LRP5	Test	134	No	CGCTCTTCCGATCTCTGGACCTACCTGAACCAGACG	TGCTCTTCCGATCTGACGGATGTGCCATTGAGGTTG	chr11:68115490-68115646	157	64	Chr11:68115509-68115627
LRP5	Test	135	No	CGCTCTTCCGATCTCTGGACTGGGTGGGCAAGAA	TGCTCTTCCGATCTGACGAGTCGCAGCAGGGTTTA	chr11:68115569-68115730	162	62	Chr11:68115586-68115712
LRP5	Test	136	No	CGCTCTTCCGATCTCTGCAGATCTGTGTTAGCTGCTTC	TGCTCTTCCGATCTGACGTAGAGCTTCTGCTCCTCC	chr11:68125075-68125259	185	57	Chr11:68125096-68125240
LRP5	Test	137	No	CGCTCTTCCGATCTCTGGGCAGGGATGGATGGC	TGCTCTTCCGATCTGACGGACAAAGGGGAAAGGGG	chr11:68125163-68125359	197	60	Chr11:68125179-68125341
LRP5	Test	138	No	CGCTCTTCCGATCTCTGCCTGATGGCTCCTCCAC	TGCTCTTCCGATCTGACTAGAGGGCACTCAGGATCT	chr11:68131179-68131364	186	63	Chr11:68131196-68131345
LRP5	Test	139	No	CGCTCTTCCGATCTCTGCCATTGCACCTGTCTCCA	TGCTCTTCCGATCTGACCCTCGTCATCTGTCCAGTAG	chr11:68153763-68153948	186	63	Chr11:68153781-68153928
LRP5	Test	140	Yes	CGCTCTTCCGATCTCTGGAGGATCTCGCTGGACAC	TGCTCTTCCGATCTGACTGATCTCGGTGTTGACCA	chr11:68153827-68154014	188	63	Chr11:68153845-68153996
LRP5	Test	141	Yes	CGCTCTTCCGATCTCTGGTCTACTGGACAGATGACGA	TGCTCTTCCGATCTGACGGGAGGTGCCGTTGAG	chr11:68153927-68154116	190	66	Chr11:68153947-68154100
LRP5	Test	142	Yes	CGCTCTTCCGATCTCTGATGGCATCGCGGTCG	TGCTCTTCCGATCTGACCTCCAGGCCCCAGCC	chr11:68154024-68154209	186	68	Chr11:68154039-68154194
LRP5	Test	143	No	CGCTCTTCCGATCTCTGcagagaccagacagacTCAT	TGCTCTTCCGATCTGACCAGTAGAGCTTCCCCTCCT	chr11:68157300-68157492	193	59	Chr11:68157320-68157473
LRP5	Test	144	No	CGCTCTTCCGATCTCTGACTGGGGAGAGAACCCTAAA	TGCTCTTCCGATCTGACCTCCTGGATCAAACATGTCC	chr11:68157366-68157553	188	60	Chr11:68157386-68157533
LRP5	Test	145	No	CGCTCTTCCGATCTCTGACCTATATTTCTGCCGTCCT	TGCTCTTCCGATCTGACGGGCAGCTGGTCAATGAT	chr11:68170927-68171124	198	59	Chr11:68170947-68171106
PTPN11	RTK RAS-MAPK	146	No	CGCTCTTCCGATCTCTGGAGCAAGGAGCGGGTC	TGCTCTTCCGATCTGACcccTCGGGGCTCCTC	chr12:112856872-112856946	75	72	Chr12:112856888-112856931
PTPN11	RTK RAS-MAPK	147	No	CGCTCTTCCGATCTCTGAGAGGAGTTGATGGCAGTTT	TGCTCTTCCGATCTGACCCAAGCATGGTTTTACCACT	chr12:112884132-112884271	140	43	Chr12:112884152-112884251
PTPN11	RTK RAS-MAPK	148	Yes	CGCTCTTCCGATCTCTGTTATTTGTCCCCTTGCCTCC	TGCTCTTCCGATCTGACTCAATGACATCTCCATTCTTCTC	chr12:112888081-112888274	194	42	Chr12:112888101-112888251
PTPN11	RTK RAS-MAPK	149	Yes	CGCTCTTCCGATCTCTGCCTGTATGGAGGGGAGAAAT	TGCTCTTCCGATCTGACCTGACACTCAGGGCACAA	chr12:112888176-112888373	198	44	Chr12:112888196-112888355
PTPN11	RTK RAS-MAPK	150	Yes	CGCTCTTCCGATCTCTGTGAAAGAACAACATGAACCCA	TGCTCTTCCGATCTGACACCAGTGCGCACAGAAA	chr12:112890938-112891128	191	37	Chr12:112890959-112891111
PTPN11	RTK RAS-MAPK	151	Yes	CGCTCTTCCGATCTCTGTCTTGTACGAGAGAGCCAGA	TGCTCTTCCGATCTGACCTTGCCAGACCCATTTTTCA	chr12:112891071-112891224	154	48	Chr12:112891091-112891204
PTPN11	RTK RAS-MAPK	152	No	CGCTCTTCCGATCTCTGgagtgcTTGAAAACACTAATGTAA	TGCTCTTCCGATCTGACCTCACCTGCTTGAGTTGTAG	chr12:112892300-112892489	190	36	Chr12:112892324-112892469
PTPN11	RTK RAS-MAPK	153	No	CGCTCTTCCGATCTCTGTACATCAACTGCTGTACTCG	TGCTCTTCCGATCTGACATAACAACTCACGTAAAAACAGT	chr12:112893729-112893905	177	37	Chr12:112893749-112893882
PTPN11	RTK RAS-MAPK	154	No	CGCTCTTCCGATCTCTGTGTGACTCTTTGACACGTAATAA	TGCTCTTCCGATCTGACCTATTACTGAGCGGAATATTGATAC	chr12:112910702-112910873	172	36	Chr12:112910725-112910848
PTPN11	RTK RAS-MAPK	155	No	CGCTCTTCCGATCTCTGGGAGTAACTGATTTGAACTGTTTT	TGCTCTTCCGATCTGACGAAAACACTGTGAAAAGCAAAG	chr12:112915381-112915561	181	40	Chr12:112915405-112915539
PTPN11	RTK RAS-MAPK	156	Yes	CGCTCTTCCGATCTCTGACTTTAAGGTGTTTGAAGGATTTTC	TGCTCTTCCGATCTGACTCCTCTCTCCACTTCTTTCG	chr12:112915621-112915816	196	41	Chr12:112915646-112915796
PTPN11	RTK RAS-MAPK	157	Yes	CGCTCTTCCGATCTCTGACACGGTGAATGACTTTTGG	TGCTCTTCCGATCTGACTAAACATGGCCAATCTGACA	chr12:112915734-112915890	157	40	Chr12:112915754-112915870
PTPN11	RTK RAS-MAPK	158	No	CGCTCTTCCGATCTCTGTCAGAGTTCACAGAATTAACTTTC	TGCTCTTCCGATCTGACACGACAATATACTTACTTGTCCA	chr12:112919833-112920025	193	38	Chr12:112919857-112920002
PTPN11	RTK RAS-MAPK	159	Yes	CGCTCTTCCGATCTCTGTCTGGTTTTTCTTGGCTCTAC	TGCTCTTCCGATCTGACCCATGATGCTCTCCTGCTTA	chr12:112924253-112924405	153	60	Chr12:112924274-112924385
PTPN11	RTK RAS-MAPK	160	Yes	CGCTCTTCCGATCTCTGGAGAGAACGGTCTGGCAATA	TGCTCTTCCGATCTGACTAGGAGACAGGGACAGGC	chr12:112924288-112924482	195	64	Chr12:112924308-112924464
PTPN11	RTK RAS-MAPK	161	No	CGCTCTTCCGATCTCTGCCTGCTTTTTGTCCTTCTGC	TGCTCTTCCGATCTGACCAGAAACTGTCGCTTCTTGC	chr12:112926221-112926350	130	49	Chr12:112926241-112926330
PTPN11	RTK RAS-MAPK	162	Yes	CGCTCTTCCGATCTCTGCCACTAAAAGTTGTGCATTAAACA	TGCTCTTCCGATCTGACTCAATATAATGCTGGACCGC	chr12:112926750-112926948	199	44	Chr12:112926774-112926928
PTPN11	RTK RAS-MAPK	163	Yes	CGCTCTTCCGATCTCTGAGGGATGGTCCAGACAGAA	TGCTCTTCCGATCTGACTTGTCTATCAGAGCCTGTCC	chr12:112926886-112927076	191	49	Chr12:112926905-112927056
PTPN11	RTK RAS-MAPK	164	Yes	CGCTCTTCCGATCTCTGAAATAACCATTGTCCCTCACA	TGCTCTTCCGATCTGACCTTCAGCACTACTTACTCTGC	chr12:112939905-112940076	172	46	Chr12:112939926-112940055
PTPN11	RTK RAS-MAPK	165	Yes	CGCTCTTCCGATCTCTGAAGTATTCTCTAGCGGACCA	TGCTCTTCCGATCTGACTGAAAGGCATGTGCTACAAA	chr12:112939984-112940165	182	42	Chr12:112940004-112940145
PTPN11	RTK RAS-MAPK	166	No	CGCTCTTCCGATCTCTGCAGCGTGGTCTACATTTTTG	TGCTCTTCCGATCTGACGCTGAAGTTTTGGCAGGTTT	chr12:112942449-112942590	142	40	Chr12:112942469-112942570
KRAS	RTK RAS-MAPK	167	No	CGCTCTTCCGATCTCTGACTTGTACTAGTATGCCTTAAGAA	TGCTCTTCCGATCTGACCATCGTATATATTCACATTTTAATACTTTTT	chr12:25362688-25362887	200	28	Chr12:25362712-25362856
KRAS	RTK RAS-MAPK	168	Yes	CGCTCTTCCGATCTCTGGTTGCCACCTTGTTACCTTT	TGCTCTTCCGATCTGACCAGAGAGTGGAGGATGCTTT	chr12:25368302-25368497	196	35	Chr12:25368322-25368477
KRAS	RTK RAS-MAPK	169	Yes	CGCTCTTCCGATCTCTGAGCCAGGAGTCTTTTCTTCT	TGCTCTTCCGATCTGACAACTTCTTGCACATGGCTTT	chr12:25368407-25368574	168	38	Chr12:25368427-25368554
KRAS	RTK RAS-MAPK	170	Yes	CGCTCTTCCGATCTCTGCAGATCTGTATTTATTTCAGTGTTACTT	TGCTCTTCCGATCTGACAGGACTCTGAAGATGTACCTATG	chr12:25378518-25378687	170	37	Chr12:25378546-25378664
KRAS	RTK RAS-MAPK	171	Yes	CGCTCTTCCGATCTCTGGCCTGTTTTGTGTCTACTGT	TGCTCTTCCGATCTGACAAGTTGTGGACAGGTTTTGA	chr12:25378609-25378778	170	34	Chr12:25378629-25378758
KRAS	RTK RAS-MAPK	172	Yes	CGCTCTTCCGATCTCTGACTCCTTAATGTCAGCTTATTATATTC	TGCTCTTCCGATCTGACTGGAGAAACCTGTCTCTTGG	chr12:25380128-25380317	190	38	Chr12:25380155-25380297
KRAS	RTK RAS-MAPK	173	Yes	CGCTCTTCCGATCTCTGATACACAAAGAAAGCCCTCC	TGCTCTTCCGATCTGACCAGACTGTGTTTCTCCCTTC	chr12:25380214-25380370	157	47	Chr12:25380234-25380350
KRAS	RTK RAS-MAPK	174	Yes	CGCTCTTCCGATCTCTGGTCCTGCACCAGTAATATGC	TGCTCTTCCGATCTGACTAAGGCCTGCTGAAAATGAC	chr12:25398169-25398333	165	40	Chr12:25398189-25398313
KRAS	RTK RAS-MAPK	175	Yes	CGCTCTTCCGATCTCTGTGCATATTAAAACAAGATTTACCTCTAT	TGCTCTTCCGATCTGACACCTTATGTGTGACATGTTCTA	chr12:25398186-25398384	199	35	Chr12:25398214-25398362
MIP	Neutral Test	176	No	CGCTCTTCCGATCTCTGGTTGTCCATTGGAGACATCG	TGCTCTTCCGATCTGACCCCCAAGCCTGAGTATTCC	chr12:56845111-56845284	174	52	Chr12:56845131-56845265
MIP	Neutral Test	177	Yes	CGCTCTTCCGATCTCTGTGAGAAGTTGCTCTCCTTCC	TGCTCTTCCGATCTGACTTGCACAGTTGCACCCT	chr12:56847348-56847547	200	60	Chr12:56847368-56847530
MIP	Neutral Test	178	Yes	CGCTCTTCCGATCTCTGGAGCCCAGTTGGCCATT	TGCTCTTCCGATCTGACGGGAAGTCTTGAGGAGGTAA	chr12:56847424-56847608	185	57	Chr12:56847441-56847588
MIP	Neutral Test	179	Yes	CGCTCTTCCGATCTCTGGTTCCCCATCCCCTCTCA	TGCTCTTCCGATCTGACAATCCTGCAGTCACTTTTGC	chr12:56848008-56848196	189	58	Chr12:56848026-56848176
MIP	Neutral Test	180	Yes	CGCTCTTCCGATCTCTGGGACAGCAGGTGGGGTA	TGCTCTTCCGATCTGACATTTGGCTTGGCCCTGG	chr12:56848061-56848257	197	59	Chr12:56848078-56848240
GAPDH	Neutral Test	181	No	CGCTCTTCCGATCTCTGCTGCTCACATATTCTGGAGG	TGCTCTTCCGATCTGACTTTGGGGCTCACCATGT	chr12:6645600-6645785	186	50	Chr12:6645620-6645768
GAPDH	Neutral Test	182	No	CGCTCTTCCGATCTCTGGAGCCACCTGGCTGATG	TGCTCTTCCGATCTGACCCCAAAGCACATTTCTTCCA	chr12:6645799-6645993	195	50	Chr12:6645816-6645973
GAPDH	Neutral Test	183	No	CGCTCTTCCGATCTCTGAACTGTCTGCTTCTCTGCTG	TGCTCTTCCGATCTGACGAGCGTGTCCATAGGGTG	chr12:6646244-6646439	196	57	Chr12:6646264-6646421
GAPDH	Neutral Test	184	No	CGCTCTTCCGATCTCTGGGGAAACTGTGGCGTGAT	TGCTCTTCCGATCTGACGATGTCATCATATTTGGCAGG	chr12:6646801-6646998	198	59	Chr12:6646819-6646977
GAPDH	Neutral Test	185	No	CGCTCTTCCGATCTCTGGATGACATCAAGAAGGTGGT	TGCTCTTCCGATCTGACGCCACATACCAGGAAATGAG	chr12:6646990-6647171	182	58	Chr12:6647010-6647151
FLT3	Test	186	No	CGCTCTTCCGATCTCTGATTGCCCCTGACAACATAGT	TGCTCTTCCGATCTGACGTGACTTTGGATTGGCTCG	chr13:28592604-28592662	59	44	Chr13:28592624-28592643
AKT1	Test	187	Yes	CGCTCTTCCGATCTCTGGCCTGGTGGGCAAAGAG	TGCTCTTCCGATCTGACGTACATCAAGACCTGGCG	chr14:105246355-105246549	195	58	Chr14:105246372-105246531
AKT1	Test	188	Yes	CGCTCTTCCGATCTCTGCAGAGAAGTTGTTGAGGGGA	TGCTCTTCCGATCTGACCCTGGCGAGGGTCTGA	chr14:105246431-105246611	181	59	Chr14:105246451-105246595
MAP2K1	RTK RAS-MAPK	189	Yes	CGCTCTTCCGATCTCTGCAGTATTGACTTGTGCTCCC	TGCTCTTCCGATCTGACCCCCAGCTCACTGATCTTC	chr15:66727332-66727509	178	52	Chr15:66727352-66727490
MAP2K1	RTK RAS-MAPK	190	Yes	CGCTCTTCCGATCTCTGGAGCTAGAGCTTGATGAGCA	TGCTCTTCCGATCTGACCAAGGCAAACTCACCTTTCT	chr15:66727399-66727589	191	54	Chr15:66727419-66727569
MAP2K1	RTK RAS-MAPK	191	No	CGCTCTTCCGATCTCTGCATCCCTTCCTCCCTCTTTC	TGCTCTTCCGATCTGACGTGCTCCATGCAGATACTGA	chr15:66729028-66729227	200	49	Chr15:66729048-66729207
MAP2K1	RTK RAS-MAPK	192	No	CGCTCTTCCGATCTCTGCTGTGTCAGTTCCCTCCTTT	TGCTCTTCCGATCTGACAGCTCAAGCAATGGAAACTT	chr15:66774052-66774247	196	52	Chr15:66774072-66774227
MAP2K1	RTK RAS-MAPK	193	No	CGCTCTTCCGATCTCTGCATGGGACTGTCTCTGGTAG	TGCTCTTCCGATCTGACGTCCAAGATGGGGACACAC	chr15:66777378-66777560	183	61	Chr15:66777398-66777541
KIF22	Test	194	No	CGCTCTTCCGATCTCTGGGAGAGGAAAACCTCACAGT	TGCTCTTCCGATCTGACCTCACCTTCTCCTGGTAGAT	chr16:29809874-29810073	200	59	Chr16:29809894-29810053
NF1	RTK RAS-MAPK	195	Yes	CGCTCTTCCGATCTCTGTTCTTCCTATTGGTCTTTGTTTTT	TGCTCTTCCGATCTGACTTATCTTACCGGTGCCATTC	chr17:29533228-29533398	171	42	Chr17:29533252-29533378
NF1	RTK RAS-MAPK	196	Yes	CGCTCTTCCGATCTCTGTGTGTATTGTCACTCGGTTG	TGCTCTTCCGATCTGACCCAAAGCAGCAGGAATAGGA	chr17:29533290-29533472	183	39	Chr17:29533310-29533452
NF1	RTK RAS-MAPK	197	Yes	CGCTCTTCCGATCTCTGTTGGATAGCTATTATCCTGAGTC	TGCTCTTCCGATCTGACCTTCTTGTCTCCAGGTCTGT	chr17:29541411-29541539	129	31	Chr17:29541434-29541519
NF1	RTK RAS-MAPK	198	Yes	CGCTCTTCCGATCTCTGCATTTAAAGAAAAAGTAACAAGCCTTA	TGCTCTTCCGATCTGACGCTAAACCCAATTAACTTAGTGTGA	chr17:29541476-29541661	186	31	Chr17:29541503-29541636
NF1	RTK RAS-MAPK	199	Yes	CGCTCTTCCGATCTCTGtcactgtctatttcttcctcctt	TGCTCTTCCGATCTGACCCTTACCTCCATTGCTTCCT	chr17:29545943-29546142	200	42	Chr17:29545966-29546122
NF1	RTK RAS-MAPK	200	Yes	CGCTCTTCCGATCTCTGAGTCACACATGCCAGAGATT	TGCTCTTCCGATCTGACCCACACACCAAAGGAACATC	chr17:29546099-29546214	116	41	Chr17:29546119-29546194
NF1	RTK RAS-MAPK	201	No	CGCTCTTCCGATCTCTGTGTTTGAGTGAGTCTTCTCTTT	TGCTCTTCCGATCTGACGAGTTAATATTTCAAGACaaaaatacaaa	chr17:29548820-29549019	200	29	Chr17:29548842-29548990
NF1	RTK RAS-MAPK	202	No	CGCTCTTCCGATCTCTGTTTTACGGGGTAGGATGTGA	TGCTCTTCCGATCTGACCAGAAAACAAACAGAGCACATAA	chr17:29552146-29552323	178	41	Chr17:29552166-29552300
NF1	RTK RAS-MAPK	203	No	CGCTCTTCCGATCTCTGTGATTTGCTGTTGTATTTGCTT	TGCTCTTCCGATCTGACGGGTGTTTCTGTTGCTAAGG	chr17:29554212-29554335	124	48	Chr17:29554234-29554315
NF1	RTK RAS-MAPK	204	No	CGCTCTTCCGATCTCTGGCTCTAGACTAAGTTGCTTTCA	TGCTCTTCCGATCTGACAGCAGATCAGTTAACAGACAA	chr17:29554496-29554666	171	38	Chr17:29554518-29554645
NF1	RTK RAS-MAPK	205	No	CGCTCTTCCGATCTCTGGACCATTGTTAAGAGGCGAA	TGCTCTTCCGATCTGACCAGGCCAGAATTGCTTCTC	chr17:29556063-29556213	151	51	Chr17:29556083-29556194
NF1	RTK RAS-MAPK	206	No	CGCTCTTCCGATCTCTGCTCCAGCAGAGAAGCAATTC	TGCTCTTCCGATCTGACAAGTCCCACTTTCTCATGGT	chr17:29556187-29556366	180	47	Chr17:29556207-29556346
NF1	RTK RAS-MAPK	207	No	CGCTCTTCCGATCTCTGAGATTCAGTTTAGGAGTTAATGTTTT	TGCTCTTCCGATCTGACAGTGCTATTACTGTAGCTTCTATC	chr17:29665654-29665795	142	31	Chr17:29665680-29665771
NF1	RTK RAS-MAPK	208	Yes	CGCTCTTCCGATCTCTGCACTTACAACAGTCAAGTTCTG	TGCTCTTCCGATCTGACAGTAATTACCTTATTAAGAAGTGGCT	chr17:29665751-29665832	82	34	Chr17:29665773-29665806
NF1	RTK RAS-MAPK	209	Yes	CGCTCTTCCGATCTCTGGCTACAGTAATAGCACTAACCAA	TGCTCTTCCGATCTGACACTAAACTTTAAGAGGTTCTACTTTAAC	chr17:29665779-29665970	192	28	Chr17:29665802-29665942
ERBB2	Test	210	No	CGCTCTTCCGATCTCTGGAAAATTCCAGTGGCCATCA	TGCTCTTCCGATCTGACCATATCTCCCCAAACCCCAA	chr17:37880194-37880361	168	52	Chr17:37880214-37880341
ERBB2	Test	211	Yes	CGCTCTTCCGATCTCTGCATACCCTCTCAGCGTACC	TGCTCTTCCGATCTGACGGCAGCCATAGGGCATAAG	chr17:37880949-37881087	139	59	Chr17:37880968-37881068
ERBB2	Test	212	Yes	CGCTCTTCCGATCTCTGGGCATCTGCCTGACATCC	TGCTCTTCCGATCTGACCTTGTGGACATAGGGGTTTG	chr17:37881030-37881219	190	58	Chr17:37881048-37881199
ERBB2	Test	213	No	CGCTCTTCCGATCTCTGGAAGGTCTACATGGGTGCT	TGCTCTTCCGATCTGACCTGCATGGTACTCTGTCTCG	chr17:37881272-37881446	175	56	Chr17:37881291-37881426
TP53	Test	214	No	CGCTCTTCCGATCTCTGGCTGTCAGTGGGGAACAA	TGCTCTTCCGATCTGACTCCCTGCTTCTGTCTCCTA	chr17:7572896-7573030	135	50	Chr17:7572914-7573011
TP53	Test	215	No	CGCTCTTCCGATCTCTGCCAACCTAGGAAGGCAGG	TGCTCTTCCGATCTGACCTTACTTCTCCCCCTCCTCT	chr17:7573875-7574063	189	61	Chr17:7573893-7574043
TP53	Test	216	Yes	CGCTCTTCCGATCTCTGgctaagctatgatgttccttagatt	TGCTCTTCCGATCTGACAAAATGGTTCTATGACTTTGCC	chr17:7576472-7576614	143	34	Chr17:7576497-7576592
TP53	Test	217	Yes	CGCTCTTCCGATCTCTGCAGGCAAAGTCATAGAACCAT	TGCTCTTCCGATCTGACTTCAGAACACCAACTTATACCA	chr17:7576591-7576696	106	32	Chr17:7576612-7576674
TP53	Test	218	No	CGCTCTTCCGATCTCTGGCATTTTGAGTGTTAGACTGG	TGCTCTTCCGATCTGACTTATGCCTCAGATTCACTTTTATC	chr17:7576794-7576973	180	45	Chr17:7576815-7576949
TP53	Test	219	No	CGCTCTTCCGATCTCTGCGCTTCTTGTCCTGCTTG	TGCTCTTCCGATCTGACGGGAGCCTCACCACG	chr17:7576996-7577060	65	63	Chr17:7577014-7577045
TP53	Test	220	No	CGCTCTTCCGATCTCTGAGCTCGTGGTGAGGC	TGCTCTTCCGATCTGACGGACAGGTAGGACCTGATTT	chr17:7577042-7577214	173	53	Chr17:7577057-7577194
TP53	Test	221	No	CGCTCTTCCGATCTCTGCAGGCCAGTGTGCAGG	TGCTCTTCCGATCTGACATCTTGGGCCTGTGTTATCT	chr17:7577464-7577633	170	55	Chr17:7577480-7577613
TP53	Test	222	No	CGCTCTTCCGATCTCTGCAGCAGGAGAAAGCCCC	TGCTCTTCCGATCTGACTCCTCAGCATCTTATCCGAG	chr17:7578085-7578279	195	54	Chr17:7578102-7578259
TP53	Test	223	No	CGCTCTTCCGATCTCTGCCACACGCAAATTTCCTTCC	TGCTCTTCCGATCTGACGGTCCCCAGGCCTCT	chr17:7578239-7578327	89	55	Chr17:7578259-7578312
TP53	Test	224	Yes	CGCTCTTCCGATCTCTGCCTGGGCAACCAGCC	TGCTCTTCCGATCTGACGCAGCTGTGGGTTGATTC	chr17:7578327-7578501	175	65	Chr17:7578342-7578483
TP53	Test	225	Yes	CGCTCTTCCGATCTCTGCCGTCATGTGCTGTGACT	TGCTCTTCCGATCTGACTTGTGCCCTGACTTTCAACT	chr17:7578419-7578597	179	58	Chr17:7578437-7578577
TP53	Test	226	Yes	CGCTCTTCCGATCTCTGGGCATTGAAGTCTCATGGAA	TGCTCTTCCGATCTGACCAGCAGCTCCTACACCG	chr17:7579269-7579457	189	60	Chr17:7579289-7579440
TP53	Test	227	Yes	CGCTCTTCCGATCTCTGGGAAGGGACAGAAGATGACA	TGCTCTTCCGATCTGACACAATGGTTCACTGAAGACC	chr17:7579390-7579534	145	64	Chr17:7579410-7579514
TP53	Test	228	Yes	CGCTCTTCCGATCTCTGGGTGTAGGAGCTGCTGG	TGCTCTTCCGATCTGACCTGACTGCTCTTTTCACCC	chr17:7579442-7579617	176	56	Chr17:7579459-7579598
TP53	Test	229	Yes	CGCTCTTCCGATCTCTGCAGCATCAAATCATCCATTGC	TGCTCTTCCGATCTGACGGACTGACTTTCTGCTCTTG	chr17:7579552-7579749	198	57	Chr17:7579573-7579729
TP53	Test	230	No	CGCTCTTCCGATCTCTGTGCTAGGGGGCTGGG	TGCTCTTCCGATCTGACGACTGCCTTCCGGGTC	chr17:7579778-7579934	157	60	Chr17:7579793-7579918
SMAD4	Test	231	Yes	CGCTCTTCCGATCTCTGGATGTTCTTTCCCATTTATTTCCT	TGCTCTTCCGATCTGACATGGCTTCTGTCCTGTGG	chr18:48591765-48591964	200	43	Chr18:48591789-48591946
SMAD4	Test	232	Yes	CGCTCTTCCGATCTCTGTTCCTTCAAGCTGCCCTATT	TGCTCTTCCGATCTGACACATAACCTTGAATAAAAGACAATGTA	chr18:48591859-48592049	191	39	Chr18:48591879-48592022
SMAD4	Test	233	No	CGCTCTTCCGATCTCTGGTCCCTCTGATGTCTTCCAA	TGCTCTTCCGATCTGACGGCCCGGTGTAAGTGAATTT	chr18:48604592-48604774	183	47	Chr18:48604612-48604754
PIK3R2	Test	234	No	CGCTCTTCCGATCTCTGaaaaGGGGACAGGGATTGAG	TGCTCTTCCGATCTGACCTCGGTGGAAGACCTTGAT	chr19:18273708-18273817	110	60	Chr19:18273728-18273798
AKT2	Test	235	No	CGCTCTTCCGATCTCTGCAGAACACTGACCCACTCAT	TGCTCTTCCGATCTGACTGTCCTAACCTCTCTCCCTC	chr19:40762801-40763000	200	55	Chr19:40762821-40762980
MAP2K2	RTK RAS-MAPK	236	Yes	CGCTCTTCCGATCTCTGCCAGACCGGAAGTTGCAG	TGCTCTTCCGATCTGACGGAAGGTACCCCATCCCC	chr19:4099168-4099331	164	69	Chr19:4099186-4099313
MAP2K2	RTK RAS-MAPK	237	Yes	CGCTCTTCCGATCTCTGGGCCAAAGATGGCCTCC	TGCTCTTCCGATCTGACCTCTGGGCTCTTTCCTCC	chr19:4099277-4099445	169	65	Chr19:4099294-4099427
MAP2K2	RTK RAS-MAPK	238	No	CGCTCTTCCGATCTCTGGGAGAGCTTGGGGGAGA	TGCTCTTCCGATCTGACAGATGTGAAGCCCTCCAAC	chr19:4100956-4101143	188	61	Chr19:4100973-4101124
MAP2K2	RTK RAS-MAPK	239	Yes	CGCTCTTCCGATCTCTGGGTCTTCCTTCTCCCCAAC	TGCTCTTCCGATCTGACCCATCCGGAACCAGATCAT	chr19:4110436-4110628	193	61	Chr19:4110455-4110609
MAP2K2	RTK RAS-MAPK	240	Yes	CGCTCTTCCGATCTCTGGTACGGCGAGTTGCATTC	TGCTCTTCCGATCTGACAGTTGGTCTTGACCACTGTT	chr19:4110570-4110760	191	60	Chr19:4110588-4110740
MAP2K2	RTK RAS-MAPK	241	Yes	CGCTCTTCCGATCTCTGCCTGCCTCCTGTTTCCAG	TGCTCTTCCGATCTGACCACCCAGAAAGCCAAGGT	chr19:4117350-4117546	197	63	Chr19:4117368-4117528
MAP2K2	RTK RAS-MAPK	242	Yes	CGCTCTTCCGATCTCTGGCCCAGCTCTGAGATCC	TGCTCTTCCGATCTGACTCCCTAGGTAGCTAACCCC	chr19:4117483-4117667	185	57	Chr19:4117500-4117648
RPL13A	Neutral Test	243	No	CGCTCTTCCGATCTCTGCCCTTGGAAGTGGGGTTT	TGCTCTTCCGATCTGACTCACCACCTGCAGTCC	chr19:49993665-49993864	200	64	Chr19:49993683-49993848
RPL13A	Neutral Test	244	No	CGCTCTTCCGATCTCTGGGGGGCTTAGATATCCTTACA	TGCTCTTCCGATCTGACCCAGCCCCTGGCCTC	chr19:49994625-49994821	197	58	Chr19:49994646-49994806
RPL13A	Neutral Test	245	No	CGCTCTTCCGATCTCTGCCCTGGAATGTACGGGAC	TGCTCTTCCGATCTGACCTGGCTCCCTTTCACTCATA	chr19:49995127-49995326	200	54	Chr19:49995145-49995306
RPL13A	Neutral Test	246	No	CGCTCTTCCGATCTCTGAGCAACCAGTTACTATGAGTG	TGCTCTTCCGATCTGACCCAAGTGCTTGCACATTCT	chr19:49995294-49995423	130	49	Chr19:49995315-49995404
RPL13A	Neutral Test	247	No	CGCTCTTCCGATCTCTGGTGCAAGCACTTGGGGA	TGCTCTTCCGATCTGACCCTGCCTCCACAGCA	chr19:49995410-49995602	193	46	Chr19:49995427-49995587
RALB	RTK RAS-MAPK	248	No	CGCTCTTCCGATCTCTGCTCTTCAGTGGGTCATCTGT	TGCTCTTCCGATCTGACCAGGGCTTACCTCGTCATAC	chr2:121036194-121036364	171	56	Chr2:121036214-121036344
ACVR1	Test	249	No	CGCTCTTCCGATCTCTGGGCCCAAATATCGACCCTT	TGCTCTTCCGATCTGACTGAGAAAGGAAGTGGGTTGA	chr2:158617438-158617635	198	48	Chr2:158617457-158617615
ACVR1	Test	250	No	CGCTCTTCCGATCTCTGACAAAAATAAAACTGGTGAGGAA	TGCTCTTCCGATCTGACAGCTAGTGGTCTTGCACATT	chr2:158622388-158622563	176	36	Chr2:158622411-158622543
ACVR1	Test	251	No	CGCTCTTCCGATCTCTGTTCCAAGTTCCATCTTTTACTTC	TGCTCTTCCGATCTGACTGTACATCAGGAAGTGGCT	chr2:158630522-158630681	160	38	Chr2:158630545-158630662
DNMT3A	Test	252	No	CGCTCTTCCGATCTCTGCCAGCAGTCTCTGCCTC	TGCTCTTCCGATCTGACCCCTCTCTGCCTTTTCTCC	chr2:25457219-25457313	95	56	Chr2:25457236-25457294
ALK	Test	253	No	CGCTCTTCCGATCTCTGGGGGTGAGGCAGTCTTTAC	TGCTCTTCCGATCTGACCCGTTGTACACTCATCTTCC	chr2:29432629-29432803	175	50	Chr2:29432648-29432783
ALK	Test	254	No	CGCTCTTCCGATCTCTGCGACAGGATGACAGGAAGAG	TGCTCTTCCGATCTGACGCTTCTGTCTCCCCACA	chr2:29436811-29436965	155	57	Chr2:29436831-29436948
ALK	Test	255	No	CGCTCTTCCGATCTCTGCTCTCGGAGGAAGGACTTG	TGCTCTTCCGATCTGACACTTTGTATCCTGTTCCTCCC	chr2:29443587-29443784	198	52	Chr2:29443606-29443763
SOS1	RTK RAS-MAPK	256	No	CGCTCTTCCGATCTCTGTCATAGCACTGACAACCTCA	TGCTCTTCCGATCTGACTGGAAAAACTCTAAAACCTTTAGTTC	chr2:39234210-39234379	170	33	Chr2:39234230-39234353
SOS1	RTK RAS-MAPK	257	Yes	CGCTCTTCCGATCTCTGTGAGCAGGTCAAAAGTCTCT	TGCTCTTCCGATCTGACTGCAGGTAAAGCAATGAAAAA	chr2:39239325-39239494	170	39	Chr2:39239345-39239473
SOS1	RTK RAS-MAPK	258	Yes	CGCTCTTCCGATCTCTGTCCTTTGGATTATTTTAGTGATGG	TGCTCTTCCGATCTGACTTTTCATTTTGATCATTTGAACTTTTT	chr2:39239439-39239625	187	23	Chr2:39239463-39239598
SOS1	RTK RAS-MAPK	259	No	CGCTCTTCCGATCTCTGAGTCACCGTGTTGGTACTTT	TGCTCTTCCGATCTGACTCCCATGTAATTCAATTCTGTGT	chr2:39240541-39240738	198	34	Chr2:39240561-39240715
SOS1	RTK RAS-MAPK	260	No	CGCTCTTCCGATCTCTGAGACTTATTTACTTCATTTATTTAATGCTT	TGCTCTTCCGATCTGACTTGTTCTATTTTATGTTAGGTTTGAAAT	chr2:39240976-39241149	174	36	Chr2:39241006-39241121
SOS1	RTK RAS-MAPK	261	No	CGCTCTTCCGATCTCTGCATCTAACATTTCTGAAAAGGATCT	TGCTCTTCCGATCTGACGTTTAATAAGATATTTTTCCTTTTTCTTCTT	chr2:39241821-39242020	200	27	Chr2:39241846-39241989
SOS1	RTK RAS-MAPK	262	Yes	CGCTCTTCCGATCTCTGACAGGCAACTGCATAATTCTT	TGCTCTTCCGATCTGACAAAGAGGAGCAGATGAGGC	chr2:39249688-39249882	195	40	Chr2:39249709-39249863
SOS1	RTK RAS-MAPK	263	Yes	CGCTCTTCCGATCTCTGGGAATTCCAGCCTTGGGC	TGCTCTTCCGATCTGACAAAACAATTGGATGGCAGCA	chr2:39249773-39249968	196	42	Chr2:39249791-39249948
SOS1	RTK RAS-MAPK	264	Yes	CGCTCTTCCGATCTCTGGCCTCATCTGCTCCTCTTTC	TGCTCTTCCGATCTGACTGACACCAATGAATACAAGCAT	chr2:39249864-39250054	191	37	Chr2:39249884-39250032
SOS1	RTK RAS-MAPK	265	Yes	CGCTCTTCCGATCTCTGTTCTCTTCAGCTGACTTGGC	TGCTCTTCCGATCTGACGTAAATCAAATCATGGGCAGC	chr2:39249968-39250157	190	32	Chr2:39249988-39250136
SOS1	RTK RAS-MAPK	266	Yes	CGCTCTTCCGATCTCTGTCATTAATTTGTACCTTTCGCAT	TGCTCTTCCGATCTGACTTGGACAGTGTTGTAATGAATTT	chr2:39250061-39250259	199	36	Chr2:39250084-39250236
SOS1	RTK RAS-MAPK	267	Yes	CGCTCTTCCGATCTCTGCATTAAGCCATCAAAGAGAAATATG	TGCTCTTCCGATCTGACCTGCATGTCGGTTTTATAGTCA	chr2:39250165-39250361	197	38	Chr2:39250190-39250339
SOS1	RTK RAS-MAPK	268	Yes	CGCTCTTCCGATCTCTGTCCCTCCCAACCATCAATA	TGCTCTTCCGATCTGACCATGAGCTCTAGGTTTTCTGTC	chr2:39250267-39250424	158	37	Chr2:39250286-39250402
SOS1	RTK RAS-MAPK	269	Yes	CGCTCTTCCGATCTCTGTCCCTGAATTTACACCACAAT	TGCTCTTCCGATCTGACGCTTTACAGCAGTTAGAAGAAAA	chr2:39251088-39251287	200	31	Chr2:39251109-39251264
SOS1	RTK RAS-MAPK	270	Yes	CGCTCTTCCGATCTCTGTCACCTCAGTCTTCGTTTTG	TGCTCTTCCGATCTGACTTTTATCCAAAAATGTACTACTGGT	chr2:39251147-39251329	183	32	Chr2:39251167-39251304
SOS1	RTK RAS-MAPK	271	No	CGCTCTTCCGATCTCTGTGAATATGTTACAAATAACAATAAAGAGT	TGCTCTTCCGATCTGACGTACAATGTCTGAAAAGTAAACTTAAA	chr2:39262316-39262506	191	32	Chr2:39262345-39262479
SOS1	RTK RAS-MAPK	272	Yes	CGCTCTTCCGATCTCTGTTCAGACATTGTACATCTTCATTT	TGCTCTTCCGATCTGACTCTTTATTTTCTAAGGAACTGGCAT	chr2:39262493-39262656	164	35	Chr2:39262517-39262631
SOS1	RTK RAS-MAPK	273	Yes	CGCTCTTCCGATCTCTGATGAAAACCAGGTCGCAAAA	TGCTCTTCCGATCTGACGCATAGTCGTGCCCCATAAT	chr2:39262582-39262721	140	33	Chr2:39262602-39262701
SOS1	RTK RAS-MAPK	274	No	CGCTCTTCCGATCTCTGAGACTTTTCGGGTATATAATTGAAGT	TGCTCTTCCGATCTGACTTCCCCCAAACAGGATGTAG	chr2:39278253-39278441	189	38	Chr2:39278279-39278421
SOS1	RTK RAS-MAPK	275	No	CGCTCTTCCGATCTCTGTCCCTTAAAAGGCAAGAAGG	TGCTCTTCCGATCTGACTTCCAAGGAACGTGTTCAAA	chr2:39285777-39285952	176	38	Chr2:39285797-39285932
MDH1	Neutral Test	276	No	CGCTCTTCCGATCTCTGGAAATTGTCCCCGCAGTTTT	TGCTCTTCCGATCTGACCCAAAAGTCCCTAAAGTGCAA	chr2:63816153-63816261	109	57	Chr2:63816173-63816240
MDH1	Neutral Test	277	No	CGCTCTTCCGATCTCTGCAGATGCTGTCCTTGCTATT	TGCTCTTCCGATCTGACTTAACAAAAACCTAAAACCTGTATTTT	chr2:63822531-63822727	197	44	Chr2:63822551-63822700
MDH1	Neutral Test	278	Yes	CGCTCTTCCGATCTCTGAACAGGTCCCAATTGGAAATA	TGCTCTTCCGATCTGACACACCAACTTCCTTTCCTTG	chr2:63831765-63831957	193	37	Chr2:63831786-63831937
MDH1	Neutral Test	279	Yes	CGCTCTTCCGATCTCTGGTATCCAGATGTCAACCATGC	TGCTCTTCCGATCTGACGACCTGCCCTCTTTAAGGTT	chr2:63831904-63832094	191	43	Chr2:63831925-63832074
MDH1	Neutral Test	280	No	CGCTCTTCCGATCTCTGCTGCAAAGGAACTGACAGAA	TGCTCTTCCGATCTGACTGTACCAAGAAGCACGTAATC	chr2:63834063-63834262	200	32	Chr2:63834083-63834241
BFSP1	Neutral Test	281	No	CGCTCTTCCGATCTCTGCCATGAAACATGTGGGAAGC	TGCTCTTCCGATCTGACGCATGTCCCATGAGTCTGA	chr20:17489483-17489680	198	64	Chr20:17489503-17489661
BFSP1	Neutral Test	282	No	CGCTCTTCCGATCTCTGGGCATCCAGCTGCCTC	TGCTCTTCCGATCTGACCGCAAGGAGCAGTACGAG	chr20:17511753-17511944	192	78	Chr20:17511769-17511926
GNAS	Test	283	No	CGCTCTTCCGATCTCTGCCCTGACCGCTTTGCTAAAT	TGCTCTTCCGATCTGACGGGCTAAGGCCACACAA	chr20:57478698-57478880	183	56	Chr20:57478718-57478863
GNAS	Test	284	No	CGCTCTTCCGATCTCTGAGCTCTTGCCTTTCTCTAAAC	TGCTCTTCCGATCTGACTGTGCTGATGGGTTGGG	chr20:57480397-57480566	170	50	Chr20:57480418-57480549
GNAS	Test	285	No	CGCTCTTCCGATCTCTGCCCACGTGTCTTTCTTTTTC	TGCTCTTCCGATCTGACGCCAATCTAAAGCAAAGGTC	chr20:57484191-57484347	157	52	Chr20:57484211-57484327
GNAS	Test	286	No	CGCTCTTCCGATCTCTGGGCTTTGGTGAGATCCATT	TGCTCTTCCGATCTGACAGAGGGACTGGGGTGA	chr20:57484367-57484545	179	45	Chr20:57484386-57484529
GNAS	Test	287	No	CGCTCTTCCGATCTCTGTAACCAGCTGTCCTCCTCC	TGCTCTTCCGATCTGACCGTTCTTTACGAACAGCCAA	chr20:57484550-57484670	121	57	Chr20:57484569-57484650
RAF1	RTK RAS-MAPK	288	No	CGCTCTTCCGATCTCTGTTCAACCTGCTGAGAACCA	TGCTCTTCCGATCTGACACAGAGGTAAGGTGGAGAGA	chr3:12627207-12627403	197	38	Chr3:12627226-12627383
RAF1	RTK RAS-MAPK	289	No	CGCTCTTCCGATCTCTGTGAACTCAACAACCAAAGGAT	TGCTCTTCCGATCTGACGGCTTTACTTCTTAGCTGTAGTT	chr3:12629067-12629221	155	35	Chr3:12629088-12629198
RAF1	RTK RAS-MAPK	290	No	CGCTCTTCCGATCTCTGAGGCATCAGACCATCTACTC	TGCTCTTCCGATCTGACGGCATGTGAACATTCTGCTT	chr3:12632275-12632465	191	51	Chr3:12632295-12632445
RAF1	RTK RAS-MAPK	291	No	CGCTCTTCCGATCTCTGACCGTGCCATTTACCCTTAT	TGCTCTTCCGATCTGACGGTTGATCCTTTGATGCCCT	chr3:12641188-12641386	199	41	Chr3:12641208-12641366
RAF1	RTK RAS-MAPK	292	No	CGCTCTTCCGATCTCTGTTGTTGGCTAAATGACTATGGA	TGCTCTTCCGATCTGACTTGTGTGTAGGAGTTGACCA	chr3:12641858-12641954	97	41	Chr3:12641880-12641934
RAF1	RTK RAS-MAPK	293	Yes	CGCTCTTCCGATCTCTGTGACATTACCACCCCCAAG	TGCTCTTCCGATCTGACCACGCCTTCACCTTTAACAC	chr3:12645604-12645763	160	55	Chr3:12645623-12645743
RAF1	RTK RAS-MAPK	294	Yes	CGCTCTTCCGATCTCTGCTCTGGGAGAGGGAACCT	TGCTCTTCCGATCTGACACAGGTAGAGTTTGCCCTTA	chr3:12645708-12645897	190	43	Chr3:12645726-12645877
RAF1	RTK RAS-MAPK	295	No	CGCTCTTCCGATCTCTGCCCACCACCCCAAATAAC	TGCTCTTCCGATCTGACAGTCTTTCCCTGCTTTTGTTTA	chr3:12647649-12647821	173	41	Chr3:12647667-12647799
RHO	Neutral Test	296	No	CGCTCTTCCGATCTCTGGCTGAGCCATGGCAGT	TGCTCTTCCGATCTGACTGAGCAGGATGTAGTTGAGAG	chr3:129247670-129247808	139	57	Chr3:129247686-129247787
RHO	Neutral Test	297	No	CGCTCTTCCGATCTCTGGCCTCTCAACTACATCCTGC	TGCTCTTCCGATCTGACCTCCTGCACACCCCAC	chr3:129247786-129247970	185	58	Chr3:129247806-129247954
RHO	Neutral Test	298	No	CGCTCTTCCGATCTCTGCTGCTGACTGCCTTGC	TGCTCTTCCGATCTGACTCAGTGCCATTACCTGGA	chr3:129249701-129249900	200	62	Chr3:129249717-129249882
RHO	Neutral Test	299	No	CGCTCTTCCGATCTCTGCCAAGTCCCTCACAGGC	TGCTCTTCCGATCTGACTGAAGACGAGCTGCCC	chr3:129251050-129251248	199	53	Chr3:129251067-129251232
RHO	Neutral Test	300	No	CGCTCTTCCGATCTCTGCTCCCTGGAGGAGCCAT	TGCTCTTCCGATCTGACAAGATGTAGAATGCCACGCT	chr3:129251330-129251506	177	61	Chr3:129251347-129251486
BFSP2	Neutral Test	301	No	CGCTCTTCCGATCTCTGTGGACTCTGTAAACCCACTG	TGCTCTTCCGATCTGACCAAGGCCACTCATGGCA	chr3:133118884-133119078	195	63	Chr3:133118904-133119061
BFSP2	Neutral Test	302	No	CGCTCTTCCGATCTCTGACTCAGTTATGCTAATTAAGTTCCTT	TGCTCTTCCGATCTGACCCTACCTCTTCATAGTTTCTTGA	chr3:133167298-133167494	197	37	Chr3:133167324-133167471
BFSP2	Neutral Test	303	No	CGCTCTTCCGATCTCTGCTCCAGAACCTGGGCG	TGCTCTTCCGATCTGACCTCTTGGATAATTGACGCGG	chr3:133191243-133191442	200	66	Chr3:133191259-133191422
PIK3CA	Test	304	No	CGCTCTTCCGATCTCTGGCAAGAAAATACCCCCTCCA	TGCTCTTCCGATCTGACTGCCTACTGGTTCAATTACTTT	chr3:178916770-178916932	163	36	Chr3:178916790-178916910
PIK3CA	Test	305	No	CGCTCTTCCGATCTCTGCATCTACAAAATCCCTTTGGGT	TGCTCTTCCGATCTGACACTACAGGTCAACAGATTACTG	chr3:178921483-178921667	185	30	Chr3:178921505-178921645
PIK3CA	Test	306	Yes	CGCTCTTCCGATCTCTGTGAACAAAAATTCCGTGGTTTTAT	TGCTCTTCCGATCTGACTGAGTGTTCACATTGTCACATA	chr3:178922192-178922352	161	34	Chr3:178922216-178922330
PIK3CA	Test	307	Yes	CGCTCTTCCGATCTCTGACCATGGAGGAGAACCCT	TGCTCTTCCGATCTGACgggtcttgctttgttgcc	chr3:178922313-178922486	174	37	Chr3:178922331-178922468
PIK3CA	Test	308	Yes	CGCTCTTCCGATCTCTGAAGTGTTTTGAAATGTGTTTTATAATTT	TGCTCTTCCGATCTGACAACACCAATAGGGTTCAGCA	chr3:178927914-178928105	192	33	Chr3:178927942-178928085
PIK3CA	Test	309	Yes	CGCTCTTCCGATCTCTGTGAATCTTTGGCCAGTACCT	TGCTCTTCCGATCTGACAGAGAGAAGGTTTGACTGCC	chr3:178928050-178928183	134	33	Chr3:178928070-178928163
PIK3CA	Test	310	Yes	CGCTCTTCCGATCTCTGTTGAAAATGTATTTGCTTTTTCTGT	TGCTCTTCCGATCTGACAGAAATTGCTTTGAGCTGTTCT	chr3:178935902-178936063	162	29	Chr3:178935927-178936041
PIK3CA	Test	311	Yes	CGCTCTTCCGATCTCTGCAGACTAGCTAGAGACAATGAATTA	TGCTCTTCCGATCTGACTCTGTAATAAAGAAAAAGAAACAGAGAAT	chr3:178936003-178936169	167	37	Chr3:178936028-178936140
PIK3CA	Test	312	Yes	CGCTCTTCCGATCTCTGGCAAAGATTATTTGTATACTGATTTAAGAC	TGCTCTTCCGATCTGACGTTAATGAGCTTTTCCATTGCC	chr3:178938706-178938900	195	35	Chr3:178938736-178938878
PIK3CA	Test	313	Yes	CGCTCTTCCGATCTCTGAGTCCTATTGTCGTGCATGT	TGCTCTTCCGATCTGACggctTCTAAACAACTCTGCC	chr3:178938824-178939010	187	42	Chr3:178938844-178938990
PIK3CA	Test	314	No	CGCTCTTCCGATCTCTGGTGAGAAAGAGATTAGCAGTTAGT	TGCTCTTCCGATCTGACCCCCCAAGAAAGTACCTGAG	chr3:178941791-178941990	200	39	Chr3:178941815-178941970
PIK3CA	Test	315	Yes	CGCTCTTCCGATCTCTGTCTTTTCTCAAGTTGGCCTG	TGCTCTTCCGATCTGACAAACCATTACTTGTCCATCGT	chr3:178947726-178947919	194	38	Chr3:178947746-178947898
PIK3CA	Test	316	Yes	CGCTCTTCCGATCTCTGTCATGTGCTGGATACTGTGT	TGCTCTTCCGATCTGACAGAACACCAAAACATTTTAAACAGA	chr3:178947823-178947946	124	37	Chr3:178947843-178947921
PIK3CA	Test	317	Yes	CGCTCTTCCGATCTCTGACTGACCAAACTGTTCTTATTACT	TGCTCTTCCGATCTGACAAAGCCTCTTGCTCAGTTTT	chr3:178951853-178952052	200	38	Chr3:178951877-178952032
PIK3CA	Test	318	Yes	CGCTCTTCCGATCTCTGGACAGCATGCCAATCTCTTC	TGCTCTTCCGATCTGACCATTTTTGTTGTCCAGCCAC	chr3:178951920-178952110	191	39	Chr3:178951940-178952090
PIK3CA	Test	319	No	CGCTCTTCCGATCTCTGGCAAGAGGCTTTGGAGTATT	TGCTCTTCCGATCTGACCCTATGCAATCGGTCTTTGC	chr3:178952041-178952238	198	40	Chr3:178952061-178952218
TP63	Test	320	No	CGCTCTTCCGATCTCTGCCTCAGGGAGCTGTTATCC	TGCTCTTCCGATCTGACCTGAATCAGGTAGGTGGGTC	chr3:189582099-189582298	200	50	Chr3:189582118-189582278
TP63	Test	321	Yes	CGCTCTTCCGATCTCTGTCCTGTTCATGCAATTTCATTTT	TGCTCTTCCGATCTGACTTACCTGGGGTGGCTCATAA	chr3:189584392-189584590	199	41	Chr3:189584415-189584570
TP63	Test	322	Yes	CGCTCTTCCGATCTCTGGCCATGCCCAGTATGTAGAA	TGCTCTTCCGATCTGACGAAACATCCCTGTTGCTGAA	chr3:189584516-189584675	160	45	Chr3:189584536-189584655
TP63	Test	323	No	CGCTCTTCCGATCTCTGCAGATTATTTACCCCTTGTTTTCA	TGCTCTTCCGATCTGACGATTTCACTTTGCCCTCTGC	chr3:189585597-189585796	200	40	Chr3:189585621-189585776
TP63	Test	324	Yes	CGCTCTTCCGATCTCTGTTGAATTTAACTCTTTCTTCCCC	TGCTCTTCCGATCTGACTCGTACCATCACCGTTCTTT	chr3:189586329-189586499	171	49	Chr3:189586352-189586479
TP63	Test	325	Yes	CGCTCTTCCGATCTCTGTCTAATTCCTAGTGGGCAAGT	TGCTCTTCCGATCTGACAGAAGATTCAACCCTACCCC	chr3:189586357-189586548	192	52	Chr3:189586378-189586528
TGFBR2	Test	326	No	CGCTCTTCCGATCTCTGGGCCTCACTGTCTGTTTTTG	TGCTCTTCCGATCTGACACCACTACACAATGATGCTG	chr3:30715571-30715770	200	49	Chr3:30715591-30715750
TGFBR2	Test	327	No	CGCTCTTCCGATCTCTGCCTCCATTTGGTTCCAAGGT	TGCTCTTCCGATCTGACGAGGCAACTTGGTTGAATCT	chr3:30729893-30730053	161	51	Chr3:30729913-30730033
TGFBR2	Test	328	Yes	CGCTCTTCCGATCTCTGGGTGCCCTTTGGATCTCTT	TGCTCTTCCGATCTGACGCCGTCTTCAGGAATCTTCT	chr3:30732882-30733070	189	60	Chr3:30732901-30733050
TGFBR2	Test	329	Yes	CGCTCTTCCGATCTCTGCTGAGTGCTGGGACCAC	TGCTCTTCCGATCTGACCAGCCTCTTTGGACATGG	chr3:30732940-30733129	190	60	Chr3:30732957-30733111
CTNNB1	Test	330	No	CGCTCTTCCGATCTCTGCCATGGAACCAGACAGAAAA	TGCTCTTCCGATCTGACTGAGTGAAGGACTGAGAAAATC	chr3:41266041-41266230	190	50	Chr3:41266061-41266208
FGFR3	RTK RAS-MAPK	331	No	CGCTCTTCCGATCTCTGCTGTCTGGGTCAAGGATGG	TGCTCTTCCGATCTGACTCCTTTCTGTAGCTGGCG	chr4:1801086-1801284	199	67	Chr4:1801105-1801266
FGFR3	RTK RAS-MAPK	332	No	CGCTCTTCCGATCTCTGGGGCATTGGTTGCGG	TGCTCTTCCGATCTGACGCTTGGCGGTGGCAG	chr4:1801442-1801598	157	66	Chr4:1801457-1801583
FGFR3	RTK RAS-MAPK	333	Yes	CGCTCTTCCGATCTCTGCTCGGGTCATGGCCTTC	TGCTCTTCCGATCTGACCTTCAGCCAGGAGATGGAG	chr4:1803057-1803218	162	69	Chr4:1803074-1803199
FGFR3	RTK RAS-MAPK	334	Yes	CGCTCTTCCGATCTCTGCCCTTACTGGACACGGC	TGCTCTTCCGATCTGACCCAGGCCCAGAGCCA	chr4:1803098-1803293	196	69	Chr4:1803115-1803278
FGFR3	RTK RAS-MAPK	335	Yes	CGCTCTTCCGATCTCTGCTCCGCTCACTCACCC	TGCTCTTCCGATCTGACTCACCCAGCACGTCCA	chr4:1803313-1803474	162	65	Chr4:1803329-1803458
FGFR3	RTK RAS-MAPK	336	Yes	CGCTCTTCCGATCTCTGGAGAACAAGTTTGGCAGCAT	TGCTCTTCCGATCTGACGCAGATGACGCTCAGGG	chr4:1803422-1803553	132	71	Chr4:1803442-1803536
FGFR3	RTK RAS-MAPK	337	Yes	CGCTCTTCCGATCTCTGCCTGAGCGTCATCTGCC	TGCTCTTCCGATCTGACCACTGGATGTGGGGCTG	chr4:1803538-1803682	145	68	Chr4:1803555-1803665
FGFR3	RTK RAS-MAPK	338	Yes	CGCTCTTCCGATCTCTGGTGGAGTTCCACTGCAAG	TGCTCTTCCGATCTGACGGGGCACCCTTGGGG	chr4:1803633-1803816	184	66	Chr4:1803651-1803801
FGFR3	RTK RAS-MAPK	339	Yes	CGCTCTTCCGATCTCTGCTGAGCCGGGTCTCTTG	TGCTCTTCCGATCTGACATGGGACAGAGTCGTTACCT	chr4:1804615-1804809	195	64	Chr4:1804632-1804789
FGFR3	RTK RAS-MAPK	340	Yes	CGCTCTTCCGATCTCTGGGATCAGTGAGAGTGTGGAG	TGCTCTTCCGATCTGACGCATGGGACAGAGTCGTT	chr4:1804645-1804811	167	64	Chr4:1804665-1804793
FGFR3	RTK RAS-MAPK	341	Yes	CGCTCTTCCGATCTCTGCCGTGTGGACTCTGTGC	TGCTCTTCCGATCTGACCCACGCAGAGTGATGAGA	chr4:1805348-1805547	200	61	Chr4:1805365-1805529
FGFR3	RTK RAS-MAPK	342	Yes	CGCTCTTCCGATCTCTGGACGCCGGGGAGTACA	TGCTCTTCCGATCTGACCCGTAAGTCACAGGATTCCC	chr4:1805485-1805664	180	63	Chr4:1805501-1805644
FGFR3	RTK RAS-MAPK	343	Yes	CGCTCTTCCGATCTCTGGGCCAGGGGCATCCAT	TGCTCTTCCGATCTGACGCGGCAGAGCGTCAC	chr4:1805986-1806172	187	68	Chr4:1806002-1806157
FGFR3	RTK RAS-MAPK	344	Yes	CGCTCTTCCGATCTCTGCCTGTTCATCCTGGTGGTG	TGCTCTTCCGATCTGACGCTCAGAACCTGGTATCTACT	chr4:1806133-1806277	145	62	Chr4:1806152-1806256
FGFR3	RTK RAS-MAPK	345	Yes	CGCTCTTCCGATCTCTGTACCTCCACGCCCTGTC	TGCTCTTCCGATCTGACCCGAGACAGCTCCCATTTG	chr4:1806495-1806691	197	67	Chr4:1806512-1806672
FGFR3	RTK RAS-MAPK	346	Yes	CGCTCTTCCGATCTCTGGACCCAAGCAGGTGTCC	TGCTCTTCCGATCTGACAAGCCCCCTACAGCCAA	chr4:1806540-1806736	197	65	Chr4:1806557-1806719
FGFR3	RTK RAS-MAPK	347	Yes	CGCTCTTCCGATCTCTGCTGAGAGTGGGCGAGTTT	TGCTCTTCCGATCTGACCCCTCCTCACCTTTCAGC	chr4:1807031-1807213	183	64	Chr4:1807049-1807195
FGFR3	RTK RAS-MAPK	348	Yes	CGCTCTTCCGATCTCTGGCCATCGGCATTGACAAG	TGCTCTTCCGATCTGACCCCCAGCCCTGCTCT	chr4:1807140-1807243	104	67	Chr4:1807158-1807228
FGFR3	RTK RAS-MAPK	349	Yes	CGCTCTTCCGATCTCTGAAGGTGAGGAGGGGGC	TGCTCTTCCGATCTGACCTACCGCCCTGCGTG	chr4:1807201-1807400	200	64	Chr4:1807217-1807385
FGFR3	RTK RAS-MAPK	350	Yes	CGCTCTTCCGATCTCTGGAAGATGATCGGGAAACACAA	TGCTCTTCCGATCTGACcAGAAACTCCCGCAGGTTA	chr4:1807338-1807532	195	66	Chr4:1807359-1807513
FGFR3	RTK RAS-MAPK	351	Yes	CGCTCTTCCGATCTCTGGTCTGAGGAGCCCGTG	TGCTCTTCCGATCTGACGGTCCTTGAAGGTGAGCTG	chr4:1807454-1807611	158	68	Chr4:1807470-1807592
FGFR3	RTK RAS-MAPK	352	Yes	CGCTCTTCCGATCTCTGGGTAACCTGCGGGAGTTTC	TGCTCTTCCGATCTGACCCTACTCCACCCACACCT	chr4:1807512-1807699	188	68	Chr4:1807531-1807681
FGFR3	RTK RAS-MAPK	353	No	CGCTCTTCCGATCTCTGGCTTCAGCCCTGCCTC	TGCTCTTCCGATCTGACTACTGGCATGACCCCCA	chr4:1807747-1807943	197	64	Chr4:1807763-1807926
FGFR3	RTK RAS-MAPK	354	No	CGCTCTTCCGATCTCTGAACACCGCCTTCCCAC	TGCTCTTCCGATCTGACGAGCTCTGCAGGACACG	chr4:1807958-1808074	117	62	Chr4:1807974-1808057
FGFR3	RTK RAS-MAPK	355	No	CGCTCTTCCGATCTCTGGGGACGACTCCGTGTTTG	TGCTCTTCCGATCTGACTGTCTCTCCATCTGCACTG	chr4:1808919-1809091	173	67	Chr4:1808937-1809072
KIT	Test	356	No	CGCTCTTCCGATCTCTGGTGGTAGAGATCCCATCCTG	TGCTCTTCCGATCTGACAGAGCACTCTGGAGAGAGAA	chr4:55593327-55593525	199	42	Chr4:55593347-55593505
KIT	Test	357	No	CGCTCTTCCGATCTCTGATTTTTCCCTTTCTCCCCAC	TGCTCTTCCGATCTGACACCCAAAAAGGTGACATGGA	chr4:55593560-55593749	190	41	Chr4:55593580-55593729
KIT	Test	358	Yes	CGCTCTTCCGATCTCTGACCTTGTTGTCTTCCTTCCT	TGCTCTTCCGATCTGACACCATACAGGAACTTACGCT	chr4:55593965-55594110	146	48	Chr4:55593985-55594090
KIT	Test	359	Yes	CGCTCTTCCGATCTCTGTCCTTCCTACAGGGAAAACC	TGCTCTTCCGATCTGACCACAACTGGCAAACTGATGT	chr4:55593977-55594144	168	49	Chr4:55593997-55594124
KIT	Test	360	No	CGCTCTTCCGATCTCTGGCCAGTTGTGCTTTTTGCTA	TGCTCTTCCGATCTGACGACAATAAAAGGCAGCTTGGA	chr4:55594135-55594319	185	44	Chr4:55594155-55594298
KIT	Test	361	No	CGCTCTTCCGATCTCTGTCTAACCTTTTCTTATGTGCTTTTA	TGCTCTTCCGATCTGACATTTATGTAAATCAGTCTTACCAGG	chr4:55595475-55595672	198	35	Chr4:55595500-55595647
KIT	Test	362	No	CGCTCTTCCGATCTCTGTGGTTTTCTTTTCTCCTCCAAC	TGCTCTTCCGATCTGACTCAAGCAGAGAATGGGTACT	chr4:55599207-55599381	175	40	Chr4:55599229-55599361
APC	Test	363	No	CGCTCTTCCGATCTCTGATACAGGTCACGGGGAGC	TGCTCTTCCGATCTGACCATTATATTTTATGCTATAATTTGTTGGTC	chr5:112174594-112174793	200	36	Chr5:112174612-112174763
APC	Test	364	Yes	CGCTCTTCCGATCTCTGTGCACAGAGTAGAAGTGGTC	TGCTCTTCCGATCTGACAGAATCTGCTTCCTGTGTCG	chr5:112174996-112175185	190	37	Chr5:112175016-112175165
APC	Test	365	Yes	CGCTCTTCCGATCTCTGAGTTCATTATCATCTTTGTCATCAG	TGCTCTTCCGATCTGACAGTCTGCTGGATTTGGTTCT	chr5:112175114-112175301	188	42	Chr5:112175139-112175281
APC	Test	366	Yes	CGCTCTTCCGATCTCTGAGCAGTGTCACAGCACC	TGCTCTTCCGATCTGACCCTGGCTGATTCTGAAGATAA	chr5:112175263-112175335	73	49	Chr5:112175280-112175314
APC	Test	367	Yes	CGCTCTTCCGATCTCTGACAGCACCCTAGAACCAAAT	TGCTCTTCCGATCTGACCAAGTGAACTGACAGAAGTACA	chr5:112175272-112175471	200	46	Chr5:112175292-112175449
APC	Test	368	Yes	CGCTCTTCCGATCTCTGGACCCCACTCATGTTTAGCA	TGCTCTTCCGATCTGACGTGGTGGAGGTGTTTTACTTC	chr5:112175428-112175615	188	47	Chr5:112175448-112175594
APC	Test	369	Yes	CGCTCTTCCGATCTCTGGTTCAGAGTGAACCATGCAG	TGCTCTTCCGATCTGACGCAGCTTGCTTAGGTCC	chr5:112175504-112175703	200	47	Chr5:112175524-112175686
APC	Test	370	Yes	CGCTCTTCCGATCTCTGGCCACCAAGCAGAAGTAAAA	TGCTCTTCCGATCTGACATCAGCATCTGGAAGAACCT	chr5:112175584-112175749	166	47	Chr5:112175604-112175729
APC	Test	371	Yes	CGCTCTTCCGATCTCTGACCTAAGCAAGCTGCAGTAA	TGCTCTTCCGATCTGACTCAGGCTGGATGAACAAGAA	chr5:112175689-112175810	122	44	Chr5:112175709-112175790
APC	Test	372	Yes	CGCTCTTCCGATCTCTGCAGGTTCTTCCAGATGCTGA	TGCTCTTCCGATCTGACTTTCCTGAACTGGAGGCATT	chr5:112175729-112175882	154	41	Chr5:112175749-112175862
APC	Test	373	Yes	CGCTCTTCCGATCTCTGGATGAGCCATTTATACAGAAAGAT	TGCTCTTCCGATCTGACTCAATATCATCATCATCTGAATCATC	chr5:112175825-112176009	185	34	Chr5:112175849-112175983
APC	Test	374	Yes	CGCTCTTCCGATCTCTGAGCCTAAAGAATCAAATGAAAACC	TGCTCTTCCGATCTGACATTTTGAAGCAGTCTGGGCT	chr5:112175913-112176092	180	34	Chr5:112175937-112176072
CSF1R	Test	375	No	CGCTCTTCCGATCTCTGAGTGGTACTCCCTGTCGT	TGCTCTTCCGATCTGACGGTCCCTCCCACCCTC	chr5:149433607-149433805	199	60	Chr5:149433625-149433789
CSF1R	Test	376	No	CGCTCTTCCGATCTCTGCCTGGGATCCCTTCGCTTA	TGCTCTTCCGATCTGACTGGCCTCTTACCTGATCTTG	chr5:149434780-149434929	150	51	Chr5:149434799-149434909
CSF1R	Test	377	No	CGCTCTTCCGATCTCTGGCAACCAGAGGAGCCAG	TGCTCTTCCGATCTGACGGCCCAAAATAACTGGGGA	chr5:149435536-149435731	196	60	Chr5:149435553-149435712
CSF1R	Test	378	No	CGCTCTTCCGATCTCTGAAGCCCTCCCAGCACTTA	TGCTCTTCCGATCTGACAGAAGGCCCAAGACTAACC	chr5:149435763-149435942	180	55	Chr5:149435781-149435923
CSF1R	Test	379	No	CGCTCTTCCGATCTCTGCAGACCTGGGTGGCTATG	TGCTCTTCCGATCTGACGACGCCTCTTCCCACC	chr5:149436808-149436967	160	61	Chr5:149436826-149436951
CSF1R	Test	380	No	CGCTCTTCCGATCTCTGCAGAGGCCCCAAGACCT	TGCTCTTCCGATCTGACCTTTGGGACTGTGGTTCTTC	chr5:149440381-149440562	182	60	Chr5:149440398-149440542
CSF1R	Test	381	No	CGCTCTTCCGATCTCTGCATCCCCTCCCCTCACT	TGCTCTTCCGATCTGACGGGACTTAAGGGACCTGTG	chr5:149441034-149441187	154	60	Chr5:149441051-149441168
MET	Test	382	No	CGCTCTTCCGATCTCTGGGAAAGATAACATCAACATGGC	TGCTCTTCCGATCTGACCACCACACAGTCAGGACA	chr7:116339473-116339669	197	49	Chr7:116339495-116339651
MET	Test	383	No	CGCTCTTCCGATCTCTGTGTCCTGACTGTGTGGTGA	TGCTCTTCCGATCTGACTGGTCCGTCAAAAACATAAAAC	chr7:116339652-116339833	182	42	Chr7:116339671-116339811
MET	Test	384	No	CGCTCTTCCGATCTCTGCAGATTCTGCCGAACCAATG	TGCTCTTCCGATCTGACAAGTGGGGAACTGATGTGAC	chr7:116340190-116340362	173	42	Chr7:116340210-116340342
MET	Test	385	No	CGCTCTTCCGATCTCTGAGCTCTTTCTTTCTCTCTGTTTT	TGCTCTTCCGATCTGACAGGTATTTCTCAGAACAATAAACTG	chr7:116411877-116412076	200	40	Chr7:116411900-116412051
MET	Test	386	No	CGCTCTTCCGATCTCTGAGTCATCCCAATGTCCTCTC	TGCTCTTCCGATCTGACGCTGGCTTACAGCTAGTTTG	chr7:116418892-116419060	169	47	Chr7:116418912-116419040
MET	Test	387	No	CGCTCTTCCGATCTCTGACAGTAGATGCTTAGTTTATGCTT	TGCTCTTCCGATCTGACTGGCACAGAGATTCTGATACTT	chr7:116421996-116422175	180	38	Chr7:116422020-116422153
MET	Test	388	No	CGCTCTTCCGATCTCTGTGTCCTTTCTGTAGGCTGGA	TGCTCTTCCGATCTGACAGAGATAACCAATACATTACCACAT	chr7:116423344-116423543	200	40	Chr7:116423364-116423518
BRAF	RTK RAS-MAPK	389	Yes	CGCTCTTCCGATCTCTGAGTCTGTTCTTTTGGATAGCA	TGCTCTTCCGATCTGACTTTTATGGTGGGACGAGGAT	chr7:140439575-140439741	167	42	Chr7:140439596-140439721
BRAF	RTK RAS-MAPK	390	Yes	CGCTCTTCCGATCTCTGTTGGACAGTTACTCCGTACC	TGCTCTTCCGATCTGACttgtgttttcaATGAGTGTGAA	chr7:140439680-140439826	147	36	Chr7:140439700-140439804
BRAF	RTK RAS-MAPK	391	Yes	CGCTCTTCCGATCTCTGTGTATATAGACGGTAAAATAAACACCA	TGCTCTTCCGATCTGACTCTAACAGGCACCAGAAGTC	chr7:140449041-140449226	186	36	Chr7:140449068-140449206
BRAF	RTK RAS-MAPK	392	Yes	CGCTCTTCCGATCTCTGTCTGACTGAAAGCTGTATGG	TGCTCTTCCGATCTGACGGTGTTTTAATGGTAAAAGCATTG	chr7:140449166-140449321	156	32	Chr7:140449186-140449297
BRAF	RTK RAS-MAPK	393	No	CGCTCTTCCGATCTCTGAGCATCTCAGGGCCAAAAA	TGCTCTTCCGATCTGACGTTTTCCTTTACTTACTACACCTCA	chr7:140453023-140453219	197	38	Chr7:140453042-140453194
BRAF	RTK RAS-MAPK	394	No	CGCTCTTCCGATCTCTGGCAGACAAATTTCAGGAAGG	TGCTCTTCCGATCTGACAGTCCTTTAGCCCTACTCAG	chr7:140453963-140454078	116	38	Chr7:140453983-140454058
BRAF	RTK RAS-MAPK	395	Yes	CGCTCTTCCGATCTCTGAGCAGCCAAAACCTTTAAAAC	TGCTCTTCCGATCTGACCTGGCTATTGTTACCCAGTG	chr7:140476637-140476833	197	40	Chr7:140476658-140476813
BRAF	RTK RAS-MAPK	396	Yes	CGCTCTTCCGATCTCTGGATGGTGATACAAGCTGGAG	TGCTCTTCCGATCTGACGACAGACTACTTTGGTTCTCTT	chr7:140476785-140476970	186	40	Chr7:140476805-140476948
BRAF	RTK RAS-MAPK	397	No	CGCTCTTCCGATCTCTGGGGAACCAGGAGCTAATAAAAA	TGCTCTTCCGATCTGACAAAATTGAAATGACACTTGGAGTA	chr7:140477728-140477914	187	39	Chr7:140477750-140477890
BRAF	RTK RAS-MAPK	398	Yes	CGCTCTTCCGATCTCTGAGTTGTTAAACATATCCTATTATGACTT	TGCTCTTCCGATCTGACGTTTTTATCAAGAAAACACTTGGTAG	chr7:140481319-140481505	187	40	Chr7:140481347-140481479
BRAF	RTK RAS-MAPK	399	Yes	CGCTCTTCCGATCTCTGCATGCCACTTTCCCTTGTAG	TGCTCTTCCGATCTGACCTGTTTGGCTTGACTTGACT	chr7:140481376-140481533	158	42	Chr7:140481396-140481513
BRAF	RTK RAS-MAPK	400	Yes	CGCTCTTCCGATCTCTGGGATAATATTACATTTGGCTGTGAC	TGCTCTTCCGATCTGACAGGTTTGTCTGCTACCCC	chr7:140482748-140482947	200	41	Chr7:140482773-140482929
BRAF	RTK RAS-MAPK	401	Yes	CGCTCTTCCGATCTCTGAGATGACTTCCTTTCTCGCT	TGCTCTTCCGATCTGACCCAACCTTCTACCCCTGATAA	chr7:140482848-140483031	184	42	Chr7:140482868-140483010
BRAF	RTK RAS-MAPK	402	No	CGCTCTTCCGATCTCTGAAGAGGCAAGTATAAAGGAAATAAG	TGCTCTTCCGATCTGACTCTGATTATATGCTTGCTTGGAA	chr7:140487266-140487434	169	33	Chr7:140487291-140487411
BRAF	RTK RAS-MAPK	403	Yes	CGCTCTTCCGATCTCTGTCACAAGAAGCTTATCACTTAAAA	TGCTCTTCCGATCTGACCAGCTCCCAATGTGCATATAAA	chr7:140493971-140494154	184	29	Chr7:140493995-140494132
BRAF	RTK RAS-MAPK	404	Yes	CGCTCTTCCGATCTCTGGCAATGCTGGATACTTACATCA	TGCTCTTCCGATCTGACTTTCCAGGCCCCAAATTCTC	chr7:140494090-140494274	185	44	Chr7:140494112-140494254
BRAF	RTK RAS-MAPK	405	Yes	CGCTCTTCCGATCTCTGATATGCACATTGGGAGCTGA	TGCTCTTCCGATCTGACTCTTCCAATGACTTCATTTTTCC	chr7:140494136-140494292	157	46	Chr7:140494156-140494269
BRAF	RTK RAS-MAPK	406	Yes	CGCTCTTCCGATCTCTGAAGAAAGCGGTTCAAGTAGC	TGCTCTTCCGATCTGACTTTTGCCTCACAGTTTGCTG	chr7:140500111-140500294	184	50	Chr7:140500131-140500274
BRAF	RTK RAS-MAPK	407	Yes	CGCTCTTCCGATCTCTGGAAGGGGATGATCCAGATGT	TGCTCTTCCGATCTGACTTCTGGGTTTTGCACAAGTT	chr7:140500186-140500326	141	46	Chr7:140500206-140500306
BRAF	RTK RAS-MAPK	408	Yes	CGCTCTTCCGATCTCTGGGTAGGTAGAAAAGAGATATTTTTGG	TGCTCTTCCGATCTGACCTTTGCAGGTACGAAAAACG	chr7:140501177-140501368	192	38	Chr7:140501203-140501348
BRAF	RTK RAS-MAPK	409	Yes	CGCTCTTCCGATCTCTGTGTACTACAACGCTGGTGAA	TGCTCTTCCGATCTGACGTGAGTTTTTGAAATCTCTGTGA	chr7:140501250-140501398	149	37	Chr7:140501270-140501375
BRAF	RTK RAS-MAPK	410	No	CGCTCTTCCGATCTCTGTCCCTAAATAAAAATTCATTCATTAAAATC	TGCTCTTCCGATCTGACGGCTTGTGTCTACATTTTTCAG	chr7:140507687-140507884	198	32	Chr7:140507717-140507862
BRAF	RTK RAS-MAPK	411	No	CGCTCTTCCGATCTCTGTCACGTCACATACAAACCAT	TGCTCTTCCGATCTGACTGCTCCCTTTACCTCTTATCAA	chr7:140508670-140508836	167	42	Chr7:140508690-140508814
EZH2	Test	412	No	CGCTCTTCCGATCTCTGGAGTTCCAATTCTCACGTCAA	TGCTCTTCCGATCTGACACTGGGCTGTGCTTACTTTT	chr7:148506371-148506512	142	40	Chr7:148506392-148506492
EZH2	Test	413	No	CGCTCTTCCGATCTCTGCCTCCCAGCTCTGAAACA	TGCTCTTCCGATCTGACGGCTTGATCACCTTTATCCA	chr7:148507404-148507557	154	37	Chr7:148507422-148507537
EZH2	Test	414	No	CGCTCTTCCGATCTCTGGAATACAGGTTATCAGTGCCTT	TGCTCTTCCGATCTGACGTCCATTTTCACCCTCCTTTT	chr7:148508693-148508863	171	41	Chr7:148508715-148508842
EZH2	Test	415	No	CGCTCTTCCGATCTCTGGCCCCTTTTTCCAAGAGAAG	TGCTCTTCCGATCTGACTTTAGGTGGAAGATGAAACTGT	chr7:148526785-148526945	161	36	Chr7:148526805-148526923
EGFR	Test	416	Yes	CGCTCTTCCGATCTCTGTGACCCTTGTCTCTGTGTTC	TGCTCTTCCGATCTGACTGCCAGGGACCTTACCTT	chr7:55241581-55241751	171	52	Chr7:55241601-55241733
EGFR	Test	417	Yes	CGCTCTTCCGATCTCTGTTACACCCAGTGGAGAAGC	TGCTCTTCCGATCTGACTATACAGCTTGCAAGGACTC	chr7:55241627-55241822	196	55	Chr7:55241646-55241802
EGFR	Test	418	No	CGCTCTTCCGATCTCTGGCATGTGGCACCATCTC	TGCTCTTCCGATCTGACCCCCACACAGCAAAGCA	chr7:55242358-55242539	182	46	Chr7:55242375-55242522
EGFR	Test	419	Yes	CGCTCTTCCGATCTCTGCACTGACGTGCCTCTCC	TGCTCTTCCGATCTGACCTTTGTGTTCCCGGACATAG	chr7:55248959-55249121	163	63	Chr7:55248976-55249101
EGFR	Test	420	Yes	CGCTCTTCCGATCTCTGGGCATCTGCCTCACCTC	TGCTCTTCCGATCTGACGGATCCTGGCTCCTTATCTC	chr7:55249037-55249220	184	57	Chr7:55249054-55249200
EGFR	Test	421	Yes	CGCTCTTCCGATCTCTGCCCATGATGATCTGTCCCTC	TGCTCTTCCGATCTGACGCCTCCTTCTGCATGGTAT	chr7:55259368-55259564	197	54	Chr7:55259388-55259545
EGFR	Test	422	Yes	CGCTCTTCCGATCTCTGCAGCATGTCAAGATCACAGAT	TGCTCTTCCGATCTGACCCCAGAATGTCTGGAGAGC	chr7:55259487-55259683	197	51	Chr7:55259508-55259664
EGFR	Test	423	No	CGCTCTTCCGATCTCTGTTAACTTTTTCCAACAGAGGGA	TGCTCTTCCGATCTGACCAGTACAAACTCATTAGCATCAG	chr7:55260395-55260570	176	42	Chr7:55260417-55260547
EGFR	Test	424	Yes	CGCTCTTCCGATCTCTGCCTGCTCCTATAGCCAAGAA	TGCTCTTCCGATCTGACCCCTGCTGTGGGATGAG	chr7:55268808-55268999	192	51	Chr7:55268828-55268982
EGFR	Test	425	Yes	CGCTCTTCCGATCTCTGCGTGGTGGATGCCGAC	TGCTCTTCCGATCTGACGTAGACACAGCTTGAGAGAGA	chr7:55268961-55269091	131	57	Chr7:55268977-55269070
FGFR1	RTK RAS-MAPK	426	No	CGCTCTTCCGATCTCTGGTTACAGCTGACGGTGGA	TGCTCTTCCGATCTGACGTACTCCCCCAGCTTTCC	chr8:38271102-38271290	189	65	Chr8:38271120-38271272
FGFR1	RTK RAS-MAPK	427	No	CGCTCTTCCGATCTCTGCACACCTCCCTGGCAAT	TGCTCTTCCGATCTGACACTCCAACCTCCCCTGT	chr8:38272043-38272175	133	54	Chr8:38272060-38272158
FGFR1	RTK RAS-MAPK	428	Yes	CGCTCTTCCGATCTCTGAAACCACCAGCACAGGG	TGCTCTTCCGATCTGACtcctccttccTCAGTGCATA	chr8:38272261-38272433	173	53	Chr8:38272278-38272413
FGFR1	RTK RAS-MAPK	429	Yes	CGCTCTTCCGATCTCTGAGGCCAAAGTCTGCTATCTT	TGCTCTTCCGATCTGACGTTCTATGAGACAAGTCGGC	chr8:38272343-38272520	178	58	Chr8:38272363-38272500
FGFR1	RTK RAS-MAPK	430	Yes	CGCTCTTCCGATCTCTGCACAGGCTGGAAGACTAGG	TGCTCTTCCGATCTGACCCCAGGGCTGGAATACTG	chr8:38273317-38273508	192	61	Chr8:38273336-38273490
FGFR1	RTK RAS-MAPK	431	Yes	CGCTCTTCCGATCTCTGGCTCCTCTGGGTTGTGG	TGCTCTTCCGATCTGACGGGTTTCTTTGAGGTGAAGC	chr8:38273462-38273650	189	61	Chr8:38273479-38273630
FGFR1	RTK RAS-MAPK	432	No	CGCTCTTCCGATCTCTGAGTCTGGCCGGCACC	TGCTCTTCCGATCTGACTTAGCCTTTATCCTGCCCTC	chr8:38274806-38274995	190	50	Chr8:38274821-38274975
FGFR1	RTK RAS-MAPK	433	No	CGCTCTTCCGATCTCTGCAAGGACAGAAGCATCACTT	TGCTCTTCCGATCTGACAAGGTTTGAACTTCACCAGC	chr8:38275366-38275563	198	53	Chr8:38275386-38275543
FGFR1	RTK RAS-MAPK	434	Yes	CGCTCTTCCGATCTCTGTGCCTTCAAAAAGTTGGGAG	TGCTCTTCCGATCTGACCAGTGCATCCATGAACTCTG	chr8:38275711-38275877	167	55	Chr8:38275731-38275857
FGFR1	RTK RAS-MAPK	435	Yes	CGCTCTTCCGATCTCTGATACTCAGAGACCCCTGCT	TGCTCTTCCGATCTGACGCCCTGACTAAGAATGGGAA	chr8:38275787-38275965	179	58	Chr8:38275806-38275945
FGFR1	RTK RAS-MAPK	436	Yes	CGCTCTTCCGATCTCTGGTGCAAATCCCCCATCTACT	TGCTCTTCCGATCTGACTTCCTCATCTCCTGCATGGT	chr8:38277028-38277182	155	52	Chr8:38277048-38277162
FGFR1	RTK RAS-MAPK	437	Yes	CGCTCTTCCGATCTCTGGGTACCACTCTTCATCTTGTAG	TGCTCTTCCGATCTGACTTTCTAATGGAGCGGGACC	chr8:38277126-38277325	200	58	Chr8:38277148-38277306
FGFR1	RTK RAS-MAPK	438	Yes	CGCTCTTCCGATCTCTGGCGAGGGCAGGACATC	TGCTCTTCCGATCTGACTACCACCGACAAAGAGATGG	chr8:38279275-38279445	171	52	Chr8:38279291-38279425
FGFR1	RTK RAS-MAPK	439	Yes	CGCTCTTCCGATCTCTGGAGTCCGATAGAGTTACCCG	TGCTCTTCCGATCTGACTTGCTTCCGTTGTCTCTTCT	chr8:38279349-38279481	133	48	Chr8:38279369-38279461
FGFR1	RTK RAS-MAPK	440	Yes	CGCTCTTCCGATCTCTGGAAGACTGGTGCCATGATTA	TGCTCTTCCGATCTGACCAACGTGGAGTTCATGTGTA	chr8:38282006-38282150	145	51	Chr8:38282026-38282130
FGFR1	RTK RAS-MAPK	441	Yes	CGCTCTTCCGATCTCTGTCGATGTGCTTTAGCCACT	TGCTCTTCCGATCTGACCAAGGTCCCCATGACAAGT	chr8:38282082-38282259	178	58	Chr8:38282101-38282240
FGFR1	RTK RAS-MAPK	442	No	CGCTCTTCCGATCTCTGCTAAACTCATTCCTCCTGCTG	TGCTCTTCCGATCTGACCTGGACCCTCAATGTATCCC	chr8:38283604-38283801	198	53	Chr8:38283625-38283781
FGFR1	RTK RAS-MAPK	443	Yes	CGCTCTTCCGATCTCTGTAACTTTCGCATGCACACA	TGCTCTTCCGATCTGACTCCATATTGGACATCCCCAG	chr8:38285413-38285604	192	47	Chr8:38285432-38285584
FGFR1	RTK RAS-MAPK	444	Yes	CGCTCTTCCGATCTCTGCATTTTTCAACCAGCGCAGT	TGCTCTTCCGATCTGACCTGCTCCTGAGCCTGAC	chr8:38285480-38285677	198	55	Chr8:38285500-38285660
FGFR1	RTK RAS-MAPK	445	No	CGCTCTTCCGATCTCTGCCCAATGCCCAGACCC	TGCTCTTCCGATCTGACAGTGCCCCTTCTTCTTCC	chr8:38285816-38285976	161	49	Chr8:38285832-38285958
TGFBR1	Test	446	No	CGCTCTTCCGATCTCTGATTGGCAAAGGTCGATTTGG	TGCTCTTCCGATCTGACTGTCTGCTGCTATAAATCCCA	chr9:101900197-101900365	169	43	Chr9:101900217-101900344
ABL1	Test	447	Yes	CGCTCTTCCGATCTCTGGGGTCCCAAGCAACTACATC	TGCTCTTCCGATCTGACCCTGTAATGGTACACCCTCC	chr9:133730263-133730459	197	56	Chr9:133730283-133730439
ABL1	Test	448	Yes	CGCTCTTCCGATCTCTGGGATCAATGGCAGCTTCTTG	TGCTCTTCCGATCTGACTTATCAATCCGACAGCAGGA	chr9:133730365-133730557	193	58	Chr9:133730385-133730537
ABL1	Test	449	Yes	CGCTCTTCCGATCTCTGCTCTTTGAGCTTGCCTGTCT	TGCTCTTCCGATCTGACCCATAGACAGTGGGCTTGTT	chr9:133738096-133738280	185	56	Chr9:133738116-133738260
ABL1	Test	450	Yes	CGCTCTTCCGATCTCTGCATCACCACGCTCCATTATC	TGCTCTTCCGATCTGACGGCTGTATTTCTTCCACACG	chr9:133738227-133738396	170	58	Chr9:133738247-133738376
ABL1	Test	451	Yes	CGCTCTTCCGATCTCTGACTACGACAAGTGGGAGATG	TGCTCTTCCGATCTGACATGCATCGCCTAATGCCA	chr9:133738292-133738491	200	61	Chr9:133738312-133738473
ABL1	Test	452	No	CGCTCTTCCGATCTCTGCTGAAAAGCACTTCCTGAAATAA	TGCTCTTCCGATCTGACGCCCCGGGCTTACTC	chr9:133747465-133747617	153	47	Chr9:133747488-133747602
ABL1	Test	453	Yes	CGCTCTTCCGATCTCTGTGTTGAAGTCCTCGTTGTCT	TGCTCTTCCGATCTGACAGTGGCCATGTACAGCAG	chr9:133748218-133748374	157	57	Chr9:133748238-133748356
ABL1	Test	454	Yes	CGCTCTTCCGATCTCTGAACCTCCTGGACTACCTGAG	TGCTCTTCCGATCTGACCTGGCCAGGCCCCTA	chr9:133748303-133748440	138	57	Chr9:133748323-133748425
ABL1	Test	455	Yes	CGCTCTTCCGATCTCTGTTTGTGAAGTGGAAGGTTGG	TGCTCTTCCGATCTGACCATTTGATGGGGAACTTGGC	chr9:133750198-133750383	186	51	Chr9:133750218-133750363
ABL1	Test	456	Yes	CGCTCTTCCGATCTCTGAAGGTAGCTGATTTTGGCCT	TGCTCTTCCGATCTGACGTAGTCAGGAAGGACCACTT	chr9:133750301-133750480	180	55	Chr9:133750321-133750460
NOTCH1	Test	457	No	CGCTCTTCCGATCTCTGTGGGACCAGCGAGGAT	TGCTCTTCCGATCTGACCACAGCCGCACCTTGG	chr9:139390769-139390947	179	70	Chr9:139390785-139390931
NOTCH1	Test	458	Yes	CGCTCTTCCGATCTCTGGGCAGAGCCTGTTCCC	TGCTCTTCCGATCTGACCAGCTCCATCGTCTACCTG	chr9:139397599-139397785	187	63	Chr9:139397615-139397766
NOTCH1	Test	459	Yes	CGCTCTTCCGATCTCTGCGGTGGCACTCTGGAAG	TGCTCTTCCGATCTGACCTCACCATGTCCTGACTGT	chr9:139397709-139397899	191	65	Chr9:139397726-139397880
NOTCH1	Test	460	Yes	CGCTCTTCCGATCTCTGCGCCGGGTCTCACTC	TGCTCTTCCGATCTGACAGCAGATGATCTTCCCCTAC	chr9:139399108-139399305	198	71	Chr9:139399123-139399285
NOTCH1	Test	461	Yes	CGCTCTTCCGATCTCTGGCGAGGCCTTCACCTG	TGCTCTTCCGATCTGACAACAGCTCCTTCCACTTCCT	chr9:139399189-139399384	196	66	Chr9:139399205-139399364
NOTCH1	Test	462	Yes	CGCTCTTCCGATCTCTGAGGGGAAGATCATCTGCTG	TGCTCTTCCGATCTGACGACTGTGCGGAGCATGTA	chr9:139399288-139399465	178	65	Chr9:139399307-139399447
NOTCH1	Test	463	Yes	CGCTCTTCCGATCTCTGGGAAGTGGAAGGAGCTGTTG	TGCTCTTCCGATCTGACGTACGACCAGTACTGCAAGG	chr9:139399366-139399550	185	67	Chr9:139399386-139399530
JAK2	Test	464	No	CGCTCTTCCGATCTCTGAGCAAGTATGATGAGCAAGC	TGCTCTTCCGATCTGACGGCATTAGAAAGCCTGTAGTT	chr9:5073712-5073814	103	38	Chr9:5073732-5073793
MECP2	Test	465	No	CGCTCTTCCGATCTCTGCCACTTCCTTGACCTCGAT	TGCTCTTCCGATCTGACTTCTATCCGATCTGTGCAGG	chrX:153296321-153296406	86	56	ChrX:153296340-153296386
MECP2	Test	466	Yes	CGCTCTTCCGATCTCTGCTTGATGGGGAGTACGGTC	TGCTCTTCCGATCTGACAAAAAGAAAGCCGTGAAGGA	chrX:153296367-153296429	63	49	ChrX:153296386-153296409
MECP2	Test	467	Yes	CGCTCTTCCGATCTCTGCCTGCACAGATCGGATAGAA	TGCTCTTCCGATCTGACCAGGCCATTCCCAAGAAAC	chrX:153296387-153296495	109	61	ChrX:153296407-153296476
MECP2	Test	468	No	CGCTCTTCCGATCTCTGTTTCTTGGGAATGGCCTGA	TGCTCTTCCGATCTGACCACCCAGGTCATGGTGAT	chrX:153296478-153296553	76	59	ChrX:153296497-153296535
MECP2	Test	469	No	CGCTCTTCCGATCTCTGTTGGGAGATTTGGGCTTCTT	TGCTCTTCCGATCTGACCACATCCCTGGACCCTAATG	chrX:153296740-153296838	99	54	ChrX:153296760-153296818
MECP2	Test	470	No	CGCTCTTCCGATCTCTGCGAAGTACGCAATCAACTCC	TGCTCTTCCGATCTGACGTCTTTCTGTTTGTCCCCAC	chrX:153296852-153296923	72	50	ChrX:153296872-153296903
MECP2	Test	471	No	CGCTCTTCCGATCTCTGGGGCACATACATTTTCCTGC	TGCTCTTCCGATCTGACCATCCGTGACCGGGG	chrX:153297575-153297774	200	53	ChrX:153297595-153297759
MECP2	Test	472	No	CGCTCTTCCGATCTCTGCCCCGGTCACGGATG	TGCTCTTCCGATCTGACCAGAGGCAGGCAAAGCA	chrX:153297760-153297865	106	66	ChrX:153297775-153297848
MED12	Test	473	No	CGCTCTTCCGATCTCTGAAACAACTAAACGCCGCT	TGCTCTTCCGATCTGACTCTTCCAGCCTTTTCCTTCA	chrX:70339193-70339367	175	50	ChrX:70339211-70339347
MED12	Test	474	No	CGCTCTTCCGATCTCTGGAGGCTTGAATCTGTTTGGA	TGCTCTTCCGATCTGACAGAGCTCCCCAAATTTGTTC	chrX:70347116-70347313	198	52	ChrX:70347136-70347293
MED12	Test	475	No	CGCTCTTCCGATCTCTGCCTTTCCTGACCATCCCTC	TGCTCTTCCGATCTGACTGTAGGTGAAGGTGTGAGC	chrX:70347671-70347870	200	51	ChrX:70347690-70347851
MED12	Test	476	No	CGCTCTTCCGATCTCTGACTGAGTCATGGTGTCTGTC	TGCTCTTCCGATCTGACCAGATTGGTAGTTCACCAGC	chrX:70348413-70348584	172	48	ChrX:70348433-70348564
MED12	Test	477	No	CGCTCTTCCGATCTCTGTCATCCCTTCCAGATCTGTTT	TGCTCTTCCGATCTGACAGGGGAACCACACTTTCTAC	chrX:70348929-70349115	187	51	ChrX:70348950-70349095
CHIC1	Neutral Test	478	Yes	CGCTCTTCCGATCTCTGCAGGTTCAAACTCTTCTCCG	TGCTCTTCCGATCTGACatcctcctcGTCATCGTC	chrX:72783071-72783261	191	61	ChrX:72783091-72783243
CHIC1	Neutral Test	479	Yes	CGCTCTTCCGATCTCTGGAGGAAGAAGAAGCGGCA	TGCTCTTCCGATCTGACGGGAGCATATCTCCGCA	chrX:72783181-72783378	198	63	ChrX:72783199-72783361
CHIC1	Neutral Test	480	No	CGCTCTTCCGATCTCTGTGCATGTTTGAAAAAGGCTCT	TGCTCTTCCGATCTGACacttgaaaagagttcatagcacat	chrX:72804294-72804491	198	37	ChrX:72804315-72804467
CHIC1	Neutral Test	481	No	CGCTCTTCCGATCTCTGTCAAATGTATAGGTTGTAATTAGTTTAAG	TGCTCTTCCGATCTGACCACAGGAAAATGGTACATTTAGAA	chrX:72899422-72899609	188	27	ChrX:72899451-72899585
CHIC1	Neutral Test	482	No	CGCTCTTCCGATCTCTGGGTTCAGGATTGAAATATTGTCCTA	TGCTCTTCCGATCTGACACAGAAGTGACTGGATAAAACT	chrX:72900676-72900864	189	27	ChrX:72900701-72900842
PDGFRA	Test	483	No	CGCTCTTCCGATCTCTGTGGCTTGATCCTGAGTCATT	TGCTCTTCCGATCTGACACACTGCCTTTCGACACATA	chr4:55151970-55152132	163	49	Chr4:55151990-55152112
FBN1	Test	484	No	CGCTCTTCCGATCTCTGATGCTAACACAAAGGCAAAAA	TGCTCTTCCGATCTGACCCCATCCCACCTTTGTTTAAT	chr15:48752388-48752543	156	44	Chr15:48752409-48752522
FBN1	Test	485	Yes	CGCTCTTCCGATCTCTGGCTAAGACTGATTTCCCCAAC	TGCTCTTCCGATCTGACCTGACAACCAGACCTGTGAT	chr15:48755202-48755401	200	43	Chr15:48755223-48755381
FBN1	Test	486	Yes	CGCTCTTCCGATCTCTGAACAGCAGCACATCTTCTTG	TGCTCTTCCGATCTGACGTGATTTCCCACATGGCATC	chr15:48755339-48755494	156	41	Chr15:48755359-48755474
NOTCH3	Test	487	Yes	CGCTCTTCCGATCTCTGACCCCTCTGACTCTCCTG	TGCTCTTCCGATCTGACACCTGCCTCAACACACC	chr19:15302737-15302933	197	62	Chr19:15302755-15302916
NOTCH3	Test	488	Yes	CGCTCTTCCGATCTCTGCCGTTACGGCATGGTGA	TGCTCTTCCGATCTGACCTGCCCACCTGGCTAC	chr19:15302824-15303015	192	67	Chr19:15302841-15302999
NOTCH3	Test	489	No	CGCTCTTCCGATCTCTGCCTCCCCTCCAGACTCTT	TGCTCTTCCGATCTGACGGACCCCTGTCACTCAGG	chr19:15303160-15303291	132	67	Chr19:15303178-15303273
ATP1A3	Test	490	No	CGCTCTTCCGATCTCTGTCACCAATCTGCCCGT	TGCTCTTCCGATCTGACCTCACCCGGCCTCCT	chr19:42474333-42474483	151	59	Chr19:42474349-42474468
ATP1A3	Test	491	No	CGCTCTTCCGATCTCTGTGCAGAGGATGGTGATGG	TGCTCTTCCGATCTGACATGGGCGCCTGCTCT	chr19:42474560-42474728	169	59	Chr19:42474578-42474713
IDH1	Test	492	No	CGCTCTTCCGATCTCTGCAAGTTGGAAATTTCTGGGC	TGCTCTTCCGATCTGACTCCCCCGGCTTGTGA	chr2:209113025-209113157	133	41	Chr2:209113045-209113142
VHL	Test	493	No	CGCTCTTCCGATCTCTGCGGGTGGTCTGGATCG	TGCTCTTCCGATCTGACCCGGCCTCCATCTCCT	chr3:10183508-10183701	194	72	Chr3:10183524-10183685
VHL	Test	494	No	CGCTCTTCCGATCTCTGCAACGCTGCCGCCTG	TGCTCTTCCGATCTGACCTTCAGACCGTGCTATCGT	chr3:10183827-10183925	99	70	Chr3:10183842-10183906
VHL	Test	495	No	CGCTCTTCCGATCTCTGGTGTGGCTCTTTAACAACCT	TGCTCTTCCGATCTGACTTGGCAAAAATAGGCTGTCC	chr3:10188162-10188306	145	46	Chr3:10188182-10188286
VHL	Test	496	No	CGCTCTTCCGATCTCTGGACGGACAGCCTATTTTTGC	TGCTCTTCCGATCTGACTGGGCTTAATTTTTCAAGTGGT	chr3:10188284-10188397	114	38	Chr3:10188304-10188375
VHL	Test	497	Yes	CGCTCTTCCGATCTCTGGCCACTGAGGATTTGGTTTT	TGCTCTTCCGATCTGACCAATGCGCTCCTGTGTC	chr3:10191440-10191626	187	52	Chr3:10191460-10191609
VHL	Test	498	Yes	CGCTCTTCCGATCTCTGAGCCTAGTCAAGCCTGAGA	TGCTCTTCCGATCTGACTCAGTACCATCAAAAGCTGAG	chr3:10191509-10191700	192	47	Chr3:10191528-10191679
IDH2	Test	499	No	CGCTCTTCCGATCTCTGCCTGGCCTACCTGGTC	TGCTCTTCCGATCTGACTGGGACCACTATTATCTCTGTC	chr15:90631809-90632008	200	56	Chr15:90631825-90631986
SETBP1	Test	500	No	CGCTCTTCCGATCTCTGTTGGCTCCCTAAAGGAAATC	TGCTCTTCCGATCTGACACCTCCTTCGGGATTCTG	chr18:42531839-42531979	141	56	Chr18:42531859-42531961

## Sheet: II. Validation primers
Gene	Variants targeted	Fw primer (with 5' CS1 tail)	Rev primer (with 5' CS2 tail)	Tm (°C)
ABL1	c.440A>T (p.Y147F)	ACACTGACGACATGGTTCTACAGCACACACACGTACCTTGTAGC	TACGGTAGCAGAGACTTGGTCTCAGATGGGCAAGACACCTCCAG	64
AKT3	c.1416C>G (p.S472S)	ACACTGACGACATGGTTCTACACTGGTCTGGGATGTCGGAAG	TACGGTAGCAGAGACTTGGTCTAGGATGGTATGGACTGCATGG	64
ALK	c.3769T>G (p.L1257V)	ACACTGACGACATGGTTCTACATTTACTCACCTGTAGATGTCTCGG	TACGGTAGCAGAGACTTGGTCTTCCTAGTGATGGCCGTTGT	60
APC	c.4471T>G (p.F1491V)	ACACTGACGACATGGTTCTACACAGAGGGTCCAGGTTCTTCC	TACGGTAGCAGAGACTTGGTCTCCTGAACTGGAGGCATTATTCT	60
APC	c.3882G>A (p.Q1294Q)	ACACTGACGACATGGTTCTACAGGCAGAATCAGCTCCATCCA	TACGGTAGCAGAGACTTGGTCTTCGCTCACAGGATCTTCAGC	64
BRAF	c.G1406G>C (p.G469A)	ACACTGACGACATGGTTCTACATGTCACAATGTCACCACATTACA	TACGGTAGCAGAGACTTGGTCTTTGGGAGATTCCTGATGGGC	60
BRAF	c.1780G>C (p.D594H); c.1803A>C (p.K601N); c.1839G>C (p.L613F)	ACACTGACGACATGGTTCTACACCTTTACTTACTACACCTCAGATATATTTC	TACGGTAGCAGAGACTTGGTCTGCCTCAATTCTTACCATCCACAAAATG	60
BRAF	c.2060A>C (p.K687T)	ACACTGACGACATGGTTCTACATGGTGGGACGAGGATACCTG	TACGGTAGCAGAGACTTGGTCTGGCACTCTGCCATTAATCTCTTC	64
CBL	c.1211G>A (p.C404Y)	ACACTGACGACATGGTTCTACATGCAGTTATTTATTCAACTAATAGTCTTT	TACGGTAGCAGAGACTTGGTCTCGCTGTTTAGATCCGTACCTGCC	60
CSF1R	c.2639T>G (p.F880C)	ACACTGACGACATGGTTCTACATTGGACAGGGAAAGATCAGG	TACGGTAGCAGAGACTTGGTCTGGGAATGGGGAGAAGACAAT	60
FGFR1	c.487T>G (p.L163V)	ACACTGACGACATGGTTCTACACAAGCAACTACATCACGCCAGTC	TACGGTAGCAGAGACTTGGTCTCCTACCTTGCCATCAGAAGCAGT	62
FGFR2	c.1024T>A (p.C342S)	ACACTGACGACATGGTTCTACACATTCCTGTGTCGTCTAGCCT	TACGGTAGCAGAGACTTGGTCTCCTGGCAGAACTGTCAACCA	60
FGFR2	c.427T>G (p.F143V)	ACACTGACGACATGGTTCTACAACAAGAAGACAGGTGACAGGC	TACGGTAGCAGAGACTTGGTCTTCCTGGGTTGTTGACTTTGCT	60
FGFR2	c.1647T>G (p.N549K)	ACACTGACGACATGGTTCTACAATGATGCCACAGAGAAAGACCT	TACGGTAGCAGAGACTTGGTCTATCTGGAAGCCCAGCCATTT	64
FGFR3	c.1657G>A (p.V553M)	ACACTGACGACATGGTTCTACAAGGGCGGTAGGTGCGGTA	TACGGTAGCAGAGACTTGGTCTGCAGAAACTCCCGCAGGTTA	64
FGFR3	c.2005C>G (p.R669G)	ACACTGACGACATGGTTCTACAAGAAGACGACCAACGTGAGC	TACGGTAGCAGAGACTTGGTCTGGACACGTACACGTCACTCT	64
GAPDH	c.616A>G (p.I206V)	ACACTGACGACATGGTTCTACACATGGTATGAGAGCTGGGGAATGG	TACGGTAGCAGAGACTTGGTCTACTGACACGTTGGCAGTGG	64
KRAS	intronic	ACACTGACGACATGGTTCTACATATTGTCGGATCTCCCTCACCA	TACGGTAGCAGAGACTTGGTCTCTTGCACATGGCTTTCCCAGTA	64
KRAS	c.182A>G (p.Q61R)	ACACTGACGACATGGTTCTACACCAGACTGTGTTTCTCCCTTCTCA	ACGGTAGCAGAGACTTGGTCTGGTCCCTCATTGCACTGTACTCC	64
LRP5	c.291C>T (p.A97A)	ACACTGACGACATGGTTCTACACAAGGGAGCCGTGTACTGG	TACGGTAGCAGAGACTTGGTCTATGCGGTTGGTCTCTGAGTC	64
MAP2K1	c.167A>C (p.Q56P); c.171G>C (p.K57N)	ACACTGACGACATGGTTCTACAGTGACAGTATTGACTTGTGCTCCCCACT	TACGGTAGCAGAGACTTGGTCTAAGGCAAACTCACCTTTCTGGCCATG	60
MAP2K2	c.373T>A (p.C125S)	ACACTGACGACATGGTTCTACACATGCTCTGTTCCGTGGAG	TACGGTAGCAGAGACTTGGTCTTTGCAGCTGATCCACCTTGA	60
MAP2K2	intronic	ACACTGACGACATGGTTCTACACCTCCAGGGCAGAAAGTAGTC	TACGGTAGCAGAGACTTGGTCTGGTCACCAAAGTCCAGCACA	64
MDH1	intronic	ACACTGACGACATGGTTCTACATCAATCATGGTGAGTGTGGGC	TACGGTAGCAGAGACTTGGTCTCCGCAAGGTGGAAATCAATCC	64
MED12	c.3559C>A (p.P1187T)	ACACTGACGACATGGTTCTACACTGCTCTACCTCGCTTTCAATA	TACGGTAGCAGAGACTTGGTCTCAGGGTCACTTACTTCCATCAG	60
NF1	c.2280G>A (p.M760I)	ACACTGACGACATGGTTCTACAAGGGCTCTAAGTGCAGTAACTT	TACGGTAGCAGAGACTTGGTCTGTGTTTCTGTTGCTAAGGGCA	60
NF1	c.1274G>C (p.W425S)	ACACTGACGACATGGTTCTACATGGTGTGTGTTTGCATGGTC	TACGGTAGCAGAGACTTGGTCTCGGTGCCATTCGTATTGCTG	60
NOTCH1	c.4771C>G (p.H1591D)	ACACTGACGACATGGTTCTACATAGGGGAAGATCATCTGCTGGC	TACGGTAGCAGAGACTTGGTCTGACCAGTACTGCAAGGACCACT	62
NOTCH3	c.311T>G (p.F104C)	ACACTGACGACATGGTTCTACACCAGGACAGGGTGAGTTTAGG	TACGGTAGCAGAGACTTGGTCTTTCTTTGTGTCTGGGGCCATC	60
PTEN	c.867A>T (p.K289N)	ACACTGACGACATGGTTCTACACATACCAGGACCAGAGGAAACC	TACGGTAGCAGAGACTTGGTCTCTGCTACGTAAACACTGCTTCG	60
PTPN11	c.178G>C (p.G60R); c.182A>C (p.D61A); c.182A>G (p.D61G); c.214G>C (p.A72P); c.215C>G (p.A72G); c.226G>C (p.E76Q); c.227A>C (p.E76A); c.227A>T (p.E76V)	ACACTGACGACATGGTTCTACAGAGCTGTCACCCACATCAAG	TACGGTAGCAGAGACTTGGTCTTCTGACACTCAGGGCACAAG	60
PTPN11	c.417G>T (p.E139D)	ACACTGACGACATGGTTCTACAACATCTCTCTGGGAAAGAAGCAG	TACGGTAGCAGAGACTTGGTCTACTGGAGATTTACCTGACAGCG	60
PTPN11	c.1510A>G (p.M504V)	ACACTGACGACATGGTTCTACATCCTTCGTAGGTGTTGACTGC	TACGGTAGCAGAGACTTGGTCTCCTGCTCAAAAGGAGAGCGT	64
PTPN11	c.922A>G (p.N308D)	ACACTGACGACATGGTTCTACACTGAAGCAGTCCAGGACTTATGTGAC	TACGGTAGCAGAGACTTGGTCTATAGGCTAGAAATGTATGGTCAGAAAACACT	60
RAF1	c.770C>T (p.S257L); c.781C>G (p.P261A)	ACACTGACGACATGGTTCTACATGACATTACCACCCCCAAGGTGC	TACGGTAGCAGAGACTTGGTCTCACGCCTTCACCTTTAACACCTCCA	60
SOS1	c.1277A>C (p.Q426P)	ACACTGACGACATGGTTCTACATGAGCTCTAGGTTTTCTGTCATCT	TACGGTAGCAGAGACTTGGTCTCTCATGTTTGGCTCCTACACG	60
SOS1	c.280A>C (p.I94L)	ACACTGACGACATGGTTCTACAAGCATCCCTTCTCACCACAT	TACGGTAGCAGAGACTTGGTCTGCAATAGCTGATGCCCAATC	60
TGFBR2	c.1505G>T (p.S502I)	ACACTGACGACATGGTTCTACACCATTTGGTTCCAAGGTGCG	TACGGTAGCAGAGACTTGGTCTCACTCACTCCTTACCTGGTGG	60
TP53	c.949C>G (p.Q317E)	ACACTGACGACATGGTTCTACAACAACCAGGAGCCATTGTCT	TACGGTAGCAGAGACTTGGTCTTGCCTCTTTCCTAGCACTGC	60
TP53	c.779AC> (p.S260Y)	ACACTGACGACATGGTTCTACAGGTCCCAAAGCCAGAGAAA	TACGGTAGCAGAGACTTGGTCTCCCATCCTCACCATCATCA	60
TP53	splicing	ACACTGACGACATGGTTCTACAGAGCACTAAGCGAGGTAAGC	TACGGTAGCAGAGACTTGGTCTCCAAGACTTAGTACCTGAAGGG	64
TP63	intronic	ACACTGACGACATGGTTCTACACCTCAGGGAGCTGTTATCCG	TACGGTAGCAGAGACTTGGTCTCTGATCTGCCATCGGAGTGC	64
ZBTB16	c.T334T>A (p.L445X)	ACACTGACGACATGGTTCTACAACAGGAAGCTGCACAGTGG	TACGGTAGCAGAGACTTGGTCTGAGGGTCCAGGGAACAAGA	60
ZBTB16	c.735G>C (p.M245I); c.737T>G (p.M246R)	ACACTGACGACATGGTTCTACAAGGGAACTCTTCAGCCACCT	TACGGTAGCAGAGACTTGGTCTCTCTCCTCTCGCCCATAGTG	60
ZBTB16	c.1066C>G (p.L356V)	ACACTGACGACATGGTTCTACACATCTGGGCATCTACTCCGTG	TACGGTAGCAGAGACTTGGTCTACAGCCTCGTTATCAGGAAGC	60

## Sheet: III. Validation smMIPs
Gene	Variants targeted	smMIP 1	smMIP 2	smMIP 3	smMIP 4	smMIP 5	smMIP 6
APC	c.4471T>G (p.F1491V)	GCTTGCTTAGGTCCACTCNNNNNCTTCAGCTTCCCGATATCCGACGGTAGTGTNNNNNACTCAGGCTGGATGAACAAGAA	ATAATGCCTCCAGTTCAGGAAAANNNNNCTTCAGCTTCCCGATATCCGACGGTAGTGTNNNNNGTTCTTCCAGATGCTGA	-	-	-	-
BRAF	c.1406G>C (p.G469A)	CCCGTCTACCAAGTGTTTTCTTGANNNNNCTTCAGCTTCCCGATATCCGACGGTAGTGTNNNNNTACTTACCATGCCACT	GGTAAGTATGTAATGTGGTGACATNNNNNCTTCAGCTTCCCGATATCCGACGGTAGTGTNNNNNTAGACGGGACTCGAGT	-	-	-	-
CBL	c.1211G>A (p.C404Y)	CATGAGGTGTCCACAGGGCNNNNNCTTCAGCTTCCCGATATCCGACGGTAGTGTNNNNNCCCCTTGTATCAGTAAAGGCT	CGACTTTTTTCAGCTATGTAATAANNNNNCTTCAGCTTCCCGATATCCGACGGTAGTGTNNNNNTGAGATGGGCTCCACA	-	-	-	-
FGFR2	c.1052C>G (p.S351C)	CCTCAAAAGTTACATTCCGAATNNNNNCTTCAGCTTCCCGATATCCGACGGTAGTGTNNNNNGCAGTCAACCAAGAAAAG	ACTCTGCATGGTTGACAGTTCTNNNNNCTTCAGCTTCCCGATATCCGACGGTAGTGTNNNNNCTTGTTTTCTAGGCCGCC	-	-	-	-
FGFR2	c.1024T>A (p.C342S)	CCTCAAAAGTTACATTCCGAATNNNNNCTTCAGCTTCCCGATATCCGACGGTAGTGTNNNNNGCAGTCAACCAAGAAAAG	ACTCTGCATGGTTGACAGTTCTNNNNNCTTCAGCTTCCCGATATCCGACGGTAGTGTNNNNNCTTGTTTTCTAGGCCGCC	-	-	-	-
KRAS	c.35G>C (p.G12A); c.35G>A (p.G12D)	ACAAGTTTATATTCAGTCATTTNNNNNCTTCAGCTTCCCGATATCCGACGGTAGTGTNNNNNGATTTACCTCTATTGTTG	GCTAATTCAGAATCATTTTGTGNNNNNCTTCAGCTTCCCGATATCCGACGGTAGTGTNNNNNTTATAAGGCCTGCTGAAA	TTTCAGCAGGCCTTATAATAAANNNNNCTTCAGCTTCCCGATATCCGACGGTAGTGTNNNNNTGATTCTGAATTAGCTGT	AAGAGTGCCTTGACGATACAGCNNNNNCTTCAGCTTCCCGATATCCGACGGTAGTGTNNNNNCATGTTCTAATATAGTCA	-	-
KRAS	c.176C>A (p.A59E); c.176C>G (p.A59G)	GTATTTGCCATAAATAATACTAAANNNNNCTTCAGCTTCCCGATATCCGACGGTAGTGTNNNNNGAAACCTGTCTCTTGG	GGGGAGGGCTTTCTTTGTGNNNNNCTTCAGCTTCCCGATATCCGACGGTAGTGTNNNNNGGAAGCAAGTAGTAATTGATG	GCTTCCTGTAGGAATCCTGAGNNNNNCTTCAGCTTCCCGATATCCGACGGTAGTGTNNNNNCCCAGTCCTCATGTACTGG	GAGAAGGGAGAAACACAGTCNNNNNCTTCAGCTTCCCGATATCCGACGGTAGTGTNNNNNTGGTCCCTCATTGCACTGTA	-	-
PTPN11	c.182A>G (p.D61G)	GTCCATTGGAAAGGGAGGCNNNNNCTTCAGCTTCCCGATATCCGACGGTAGTGTNNNNNAACTCAGCCAAAGTGGCAAAT	GCTCCATTTCTTCTAAAATAGTCCNNNNNCTTCAGCTTCCCGATATCCGACGGTAGTGTNNNNNGGACCAACTCAGCCAA	CGGGCAATTAAAAGAGAAGAANNNNNCTTCAGCTTCCCGATATCCGACGGTAGTGTNNNNNTGGAGCTGTCACCCACATC	AGAATGGAGATGTCATTGAGCNNNNNCTTCAGCTTCCCGATATCCGACGGTAGTGTNNNNNCAAGATTCAGAACACTGGT	-	-
PTPN11	c.215C>G (p.A72G)	GTCCATTGGAAAGGGAGGCNNNNNCTTCAGCTTCCCGATATCCGACGGTAGTGTNNNNNAACTCAGCCAAAGTGGCAAAT	GCTCCATTTCTTCTAAAATAGTCCNNNNNCTTCAGCTTCCCGATATCCGACGGTAGTGTNNNNNGGACCAACTCAGCCAA	CGGGCAATTAAAAGAGAAGAANNNNNCTTCAGCTTCCCGATATCCGACGGTAGTGTNNNNNTGGAGCTGTCACCCACATC	AGAATGGAGATGTCATTGAGCNNNNNCTTCAGCTTCCCGATATCCGACGGTAGTGTNNNNNCAAGATTCAGAACACTGGT	TAGTAATCACCAGTGTTCTGAANNNNNCTTCAGCTTCCCGATATCCGACGGTAGTGTNNNNNGCTCAATGACATCTCCAT	TTTCTCCCCTCCATACAGGTCNNNNNCTTCAGCTTCCCGATATCCGACGGTAGTGTNNNNNCAATGACATCTCCATTCTT
PTPN11	c.227A>C (p.E76A)	CGGGCAATTAAAAGAGAAGAANNNNNCTTCAGCTTCCCGATATCCGACGGTAGTGTNNNNNTGGAGCTGTCACCCACATC	AGAATGGAGATGTCATTGAGCNNNNNCTTCAGCTTCCCGATATCCGACGGTAGTGTNNNNNCAAGATTCAGAACACTGGT	TAGTAATCACCAGTGTTCTGAANNNNNCTTCAGCTTCCCGATATCCGACGGTAGTGTNNNNNGCTCAATGACATCTCCAT	TTTCTCCCCTCCATACAGGTCNNNNNCTTCAGCTTCCCGATATCCGACGGTAGTGTNNNNNCAATGACATCTCCATTCTT	-	-
PTPN11	c.854T>G (p.F285C)	ATAAGTCCTGGACTGCTTCAGGNNNNNCTTCAGCTTCCCGATATCCGACGGTAGTGTNNNNNTCTGAAACAGGCTCATTG	GCCTGTTTCAGATTACATCAATGNNNNNCTTCAGCTTCCCGATATCCGACGGTAGTGTNNNNNTCCTGAAGCAGTCCAGG	CATCAATGCAAATATCATCATGGNNNNNCTTCAGCTTCCCGATATCCGACGGTAGTGTNNNNNGTCCAGGACTTATGTGA	-	-	-
PTPN11	c.1504T>A (p.S502T)	AAGAGAAACTGCAGAGCCAGGNNNNNCTTCAGCTTCCCGATATCCGACGGTAGTGTNNNNNGGTACTGTGCTTCTGTCTG	CTACGAAGGAAACATCATGAAGNNNNNCTTCAGCTTCCCGATATCCGACGGTAGTGTNNNNNCTGTGCTTCTGTCTGGAC	GTCCAGACAGAAGCACAGTACCNNNNNCTTCAGCTTCCCGATATCCGACGGTAGTGTNNNNNATGATGTTTCCTTCGTAG	GTCAATATCGCAGTCAACACCTACNNNNNCTTCAGCTTCCCGATATCCGACGGTAGTGTNNNNNATAATGCTGGACCGCC	-	-
PTPN11	c.1510A>G (p.M504V)	AAGAGAAACTGCAGAGCCAGGNNNNNCTTCAGCTTCCCGATATCCGACGGTAGTGTNNNNNGGTACTGTGCTTCTGTCTG	CTACGAAGGAAACATCATGAAGNNNNNCTTCAGCTTCCCGATATCCGACGGTAGTGTNNNNNCTGTGCTTCTGTCTGGAC	GTCCAGACAGAAGCACAGTACCNNNNNCTTCAGCTTCCCGATATCCGACGGTAGTGTNNNNNATGATGTTTCCTTCGTAG	GTCAATATCGCAGTCAACACCTACNNNNNCTTCAGCTTCCCGATATCCGACGGTAGTGTNNNNNATAATGCTGGACCGCC	CCTGACCTCTGAGACCGCACCANNNNNCTTCAGCTTCCCGATATCCGACGGTAGTGTNNNNNTCAGGCTGGTACCTGCTC	AGAGCAGGTACCAGCCTGAGNNNNNCTTCAGCTTCCCGATATCCGACGGTAGTGTNNNNNCGGTCTCAGAGGTCAGGGAT
PTPN11	c.1528C>A (p.Q510K)	GTCAATATCGCAGTCAACACCTACNNNNNCTTCAGCTTCCCGATATCCGACGGTAGTGTNNNNNATAATGCTGGACCGCC	CCTGACCTCTGAGACCGCACCANNNNNCTTCAGCTTCCCGATATCCGACGGTAGTGTNNNNNTCAGGCTGGTACCTGCTC	AGAGCAGGTACCAGCCTGAGNNNNNCTTCAGCTTCCCGATATCCGACGGTAGTGTNNNNNCGGTCTCAGAGGTCAGGGAT	-	-	-
RAF1	c.770C>T (p.S257L)	AAGAAAATTCCATGATTGGCACNNNNNCTTCAGCTTCCCGATATCCGACGGTAGTGTNNNNNTGACCATGTGGACATTAG	GGGGGTGGTAATGTCAGTCAATNNNNNCTTCAGCTTCCCGATATCCGACGGTAGTGTNNNNNTAACACCTCCAGTCCCTC	-	-	-	-

## Sheet: IV. Library amplification & seq
Library	Method	Fw primer	Rev primer	Index length (nt)
RainDance	Indexing-BC01	AATGATACGGCGACCACCGAGATCTACACTCTTTCCCTACACGA-CGCTCTTCCGATCTCTG	CAAGCAGAAGACGGCATACGAGATTCAGTAGTGTGACTGGAGTTCAGACGTGTGCTCTTCCGATCTGAC	8
RainDance	Indexing-BC02	AATGATACGGCGACCACCGAGATCTACACTCTTTCCCTACACGA-CGCTCTTCCGATCTCTG	CAAGCAGAAGACGGCATACGAGATTGGTCGATGTGACTGGAGTTCAGACGTGTGCTCTTCCGATCTGAC	8
RainDance	Indexing-BC03	AATGATACGGCGACCACCGAGATCTACACTCTTTCCCTACACGA-CGCTCTTCCGATCTCTG	CAAGCAGAAGACGGCATACGAGATTTCGATGGGTGACTGGAGTTCAGACGTGTGCTCTTCCGATCTGAC	8
RainDance	Indexing-BC04	AATGATACGGCGACCACCGAGATCTACACTCTTTCCCTACACGA-CGCTCTTCCGATCTCTG	CAAGCAGAAGACGGCATACGAGATGTACGTCGGTGACTGGAGTTCAGACGTGTGCTCTTCCGATCTGAC	8
RainDance	Indexing-BC05	AATGATACGGCGACCACCGAGATCTACACTCTTTCCCTACACGA-CGCTCTTCCGATCTCTG	CAAGCAGAAGACGGCATACGAGATGCCAATGCGTGACTGGAGTTCAGACGTGTGCTCTTCCGATCTGAC	8
RainDance	Indexing-BC06	AATGATACGGCGACCACCGAGATCTACACTCTTTCCCTACACGA-CGCTCTTCCGATCTCTG	CAAGCAGAAGACGGCATACGAGATGTCATTGCGTGACTGGAGTTCAGACGTGTGCTCTTCCGATCTGAC	8
RainDance	Indexing-BC07	AATGATACGGCGACCACCGAGATCTACACTCTTTCCCTACACGA-CGCTCTTCCGATCTCTG	CAAGCAGAAGACGGCATACGAGATAGATCGCAGTGACTGGAGTTCAGACGTGTGCTCTTCCGATCTGAC	8
RainDance	Indexing-BC08	AATGATACGGCGACCACCGAGATCTACACTCTTTCCCTACACGA-CGCTCTTCCGATCTCTG	CAAGCAGAAGACGGCATACGAGATAGCAGGAAGTGACTGGAGTTCAGACGTGTGCTCTTCCGATCTGAC	8
RainDance	Indexing-BC09	AATGATACGGCGACCACCGAGATCTACACTCTTTCCCTACACGA-CGCTCTTCCGATCTCTG	CAAGCAGAAGACGGCATACGAGATAGTCACTAGTGACTGGAGTTCAGACGTGTGCTCTTCCGATCTGAC	8
RainDance	Indexing-BC10	AATGATACGGCGACCACCGAGATCTACACTCTTTCCCTACACGA-CGCTCTTCCGATCTCTG	CAAGCAGAAGACGGCATACGAGATATCCTGTAGTGACTGGAGTTCAGACGTGTGCTCTTCCGATCTGAC	8
RainDance	Indexing-BC11	AATGATACGGCGACCACCGAGATCTACACTCTTTCCCTACACGA-CGCTCTTCCGATCTCTG	CAAGCAGAAGACGGCATACGAGATATTGAGGAGTGACTGGAGTTCAGACGTGTGCTCTTCCGATCTGAC	8
RainDance	Indexing-BC12	AATGATACGGCGACCACCGAGATCTACACTCTTTCCCTACACGA-CGCTCTTCCGATCTCTG	CAAGCAGAAGACGGCATACGAGATCAAGACTAGTGACTGGAGTTCAGACGTGTGCTCTTCCGATCTGAC	8
RainDance	Indexing-BC13	AATGATACGGCGACCACCGAGATCTACACTCTTTCCCTACACGA-CGCTCTTCCGATCTCTG	CAAGCAGAAGACGGCATACGAGATCACTTCGAGTGACTGGAGTTCAGACGTGTGCTCTTCCGATCTGAC	8
RainDance	Indexing-BC14	AATGATACGGCGACCACCGAGATCTACACTCTTTCCCTACACGA-CGCTCTTCCGATCTCTG	CAAGCAGAAGACGGCATACGAGATCAGCGTTAGTGACTGGAGTTCAGACGTGTGCTCTTCCGATCTGAC	8
RainDance	Indexing-BC15	AATGATACGGCGACCACCGAGATCTACACTCTTTCCCTACACGA-CGCTCTTCCGATCTCTG	CAAGCAGAAGACGGCATACGAGATCATACCAAGTGACTGGAGTTCAGACGTGTGCTCTTCCGATCTGAC	8
RainDance	Indexing-BC16	AATGATACGGCGACCACCGAGATCTACACTCTTTCCCTACACGA-CGCTCTTCCGATCTCTG	CAAGCAGAAGACGGCATACGAGATCCAGTTCAGTGACTGGAGTTCAGACGTGTGCTCTTCCGATCTGAC	8
RainDance	Indexing-BC17	AATGATACGGCGACCACCGAGATCTACACTCTTTCCCTACACGA-CGCTCTTCCGATCTCTG	CAAGCAGAAGACGGCATACGAGATCCGAAGTAGTGACTGGAGTTCAGACGTGTGCTCTTCCGATCTGAC	8
RainDance	Indexing-BC18	AATGATACGGCGACCACCGAGATCTACACTCTTTCCCTACACGA-CGCTCTTCCGATCTCTG	CAAGCAGAAGACGGCATACGAGATCGCATACAGTGACTGGAGTTCAGACGTGTGCTCTTCCGATCTGAC	8
Validation - CS-tagged amplicon	Indexing	AATGATACGGCGACCACCGAGATCTACACTGACGACATGGTTCTACA	CAAGCAGAAGACGGCATACGAGATNNNNNNNNNNTACGGTAGCAGAGACTTGGTCT	10
Validation - smMIPs	Indexing	AATGATACGGCGACCACCGAGATCTACACATACGAGATCCGTAATCGGGAAGCTGAAG	CAAGCAGAAGACGGCATACGAGATNNNNNNNNNNACACGCACGATCCGACGGTAGTGT	10
RainDance	Library quantification	AATGATACGGCGACCACCGAGATCTA	CAAGCAGAAGACGGCATACGAGAT
		Read1 primer	Read2 primer	Indexing primer
RainDance	Sequencing	CACTCTTTCCCTACACGACGCTCTTCCGATCTC	TGACTGGAGTTCAGACGTGTGCTCTTCCGATCTGAC	GATCGGAAGAGCACACGTCTGAACTCCAGTCAC
Validation - CS-tagged amplicon	Sequencing	ACACTGACGACATGGTTCTACA	TACGGTAGCAGAGACTTGGTCT	AGACCAAGTCTCTGCTACCGTA
Validation - smMIPs	Sequencing	ACACGCACGATCCGACGGTAGTGT	CATACGAGATCCGTAATCGGGAAGCTGAAG	ACACTACCGTCGGATCGTGCGTGT
